# Supplementary material for: Stimulating T cell responses against patient-derived breast cancer cells with neoantigen peptide-loaded peripheral blood mononuclear cells
Source: Springer Nature journal article supplement (doi:10.1007/s00262-024-03627-3), 2024-02-13
Supplement: MOESM3 [file 26729214]

**Supplementary Table S1. Primers of neoantigens**

| <b>Gene name</b> | <b>Ref gene No.</b> | <b>Forward primer (5'-3')</b> | <b>Reverse primer (5'-3')</b> | <b>Amplicon length (bp)</b> | <b>T<sub>m</sub> (C°)</b> |
|------------------|---------------------|-------------------------------|-------------------------------|-----------------------------|---------------------------|
| <i>ADGRL1</i>    | NM_001008701        | GCAGAAAGTCTTCGTGTG            | CCTCAGTGGCGTAGATGA            | 452                         | 53                        |
| <i>PARP1</i>     | NM_0001618          | GGAGGATGCCATTGAGCA            | CCTCTTCATCCTGGCCATAG          | 131                         | 55                        |
| <i>SEC14L2</i>   | NM_033382           | CCAAGTTTCGGGAGAATGT           | CCTTTTGCTTTCGGAACTC           | 150                         | 47                        |
| <i>LSR</i>       | NM_205834.4         | CTACGTTGAGTGCCAGGACA          | CAAAGGTCAGGTCAGCATTCC         | 131                         | 59                        |
| <i>ALKBH6</i>    | NM_001297701.2      | CAGAACTGGGGTGGGCT             | CACGAGGACATGGTTAGCTG          | 132                         | 58                        |
| <i>GAA</i>       | NM_000152.5         | CAGACGGTGCCAGTAGAG            | CTCTGTGGTTGTGAGGCC            | 180                         | 57                        |
