# Supplementary material for: Stimulating T cell responses against patient-derived breast cancer cells with neoantigen peptide-loaded peripheral blood mononuclear cells
Source: Springer Nature journal article supplement (doi:10.1007/s00262-024-03627-3), 2024-02-13
Supplement: MOESM4 [file 26729214]

**Supplementary Table S2. HLA class I phenotypes of patients and healthy donors in this study**

| Cancer cell lines | Donor no. | HLA class I alleles |        |          |        |        |        |
|-------------------|-----------|---------------------|--------|----------|--------|--------|--------|
|                   |           | HLA-A*              | HLA-A* | HLA-B*   | HLA-B* | HLA-C* | HLA-C* |
| PC-B-142CA        |           | 11:01               | 24:02  | 07:05/06 | 54:01  | 01:02  | 07:02  |
|                   | 1         | 11:01               | 24:10  | 18:02    | 40:01  | 07:02  | 07:04  |
|                   | 2         | 11:01               | 24:07  | 35:01    | 44:03  | 03:03  | 07:06  |
|                   | 3         | 11:01               | 11:01  | 40:01    | 40:01  | 03:03  | 07:02  |
| PC-B-148CA        |           | 24:02               | 33:03  | 52:01    | 52:01  | 07:02  | 07:02  |
|                   | 4         | 24:02               | 34:01  | 15:35    | 51:01  | 07:02  | 14:02  |
|                   | 5         | 24:02               | 24:02  | 08:01    | 51:01  | 07:02  | 14:02  |
|                   | 6         | 02:01               | 24:02  | 07:05/06 | 15:02  | 07:02  | 08:01  |
