# Supplementary material for: Stimulating T cell responses against patient-derived breast cancer cells with neoantigen peptide-loaded peripheral blood mononuclear cells
Source: Springer Nature journal article supplement (doi:10.1007/s00262-024-03627-3), 2024-02-13
Supplement: MOESM5 [file 26729214]

Supplementary Table S3a. List of 2,513 somatic mutations of PC-B-142CA

| Number | Gene name  | Chromosome | Gene_ID         | Mutation    | Nucleotide substitution |
|--------|------------|------------|-----------------|-------------|-------------------------|
| 1      | AICF       | chr10      | ENSG00000148584 | Silent      | c.1071C>A               |
| 2      | A4GALT     | chr22      | ENSG00000128274 | 3'UTR       | c.*35G>C                |
| 3      | AASDH      | chr4       | ENSG00000157426 | 3'UTR       | c.*273A>C               |
| 4      | AASDH      | chr4       | ENSG00000157426 | Missense    | c.431T>G                |
| 5      | ABCA10     | chr17      | ENSG00000154263 | Missense    | c.1654G>C               |
| 6      | ABCA13     | chr7       | ENSG00000179869 | Nonsense    | c.6989C>G               |
| 7      | ABCA6      | chr17      | ENSG00000154262 | Silent      | c.2073G>A               |
| 8      | ABCA6      | chr17      | ENSG00000154262 | Missense    | c.1975G>C               |
| 9      | ABCA8      | chr17      | ENSG00000141338 | Intron      | c.4371-15G>A            |
| 10     | ABCC6      | chr16      | ENSG00000091262 | Intron      | c.1943+78G>A            |
| 11     | ABCG1      | chr21      | ENSG00000160179 | Missense    | c.792C>G                |
| 12     | ABCG2      | chr4       | ENSG00000118777 | 3'UTR       | c.*750G>A               |
| 13     | ABHD11     | chr7       | ENSG00000106077 | Missense    | c.713C>T                |
| 14     | ABHD17B    | chr9       | ENSG00000107362 | 3'UTR       | c.*227A>T               |
| 15     | ABL2       | chr1       | ENSG00000143322 | Missense    | c.2158G>C               |
| 16     | AC004890.2 | chr7       | ENSG00000244560 | Intron      | n.1386-70C>T            |
| 17     | AC007318.2 | chr2       | ENSG00000273763 | Intron      | n.314-690C>G            |
| 18     | AC007405.3 | chr2       | ENSG00000239467 | Intron      | n.724+78G>C             |
| 19     | AC008753.3 | chr19      | ENSG00000269877 | Intron      | n.283+11C>G             |
| 20     | AC015910.1 | chr17      | ENSG00000265460 | 5'Flank     |                         |
| 21     | AC015910.1 | chr17      | ENSG00000265460 | 5'Flank     |                         |
| 22     | AC015910.1 | chr17      | ENSG00000265460 | Intron      | n.202-106G>C            |
| 23     | AC015910.1 | chr17      | ENSG00000265460 | RNA         | n.207G>C                |
| 24     | AC025165.3 | chr12      | ENSG00000257921 | Intron      | c.77-562G>C             |
| 25     | AC048338.2 | chr12      | ENSG00000284934 | 5'UTR       | c.-309G>A               |
| 26     | AC053481.3 | chr17      | ENSG00000266365 | RNA         | n.34C>G                 |
| 27     | AC068633.1 | chr3       | ENSG00000243276 | Intron      | n.245+52C>A             |
| 28     | AC079395.2 | chr2       | ENSG00000273634 | RNA         | n.2G>A                  |
| 29     | AC093802.1 | chr2       | ENSG00000220256 | RNA         | n.2079C>G               |
| 30     | AC099489.1 | chr16      | ENSG00000188897 | Silent      | c.3819C>A               |
| 31     | AC104771.1 | chr4       | ENSG00000271676 | RNA         | n.197C>A                |
| 32     | AC112482.2 | chr3       | ENSG00000287784 | 3'Flank     |                         |
| 33     | AC118758.3 | chr7       | ENSG00000279072 | RNA         | n.596C>G                |
| 34     | ACADM      | chr1       | ENSG00000117054 | 5'UTR       | c.-23G>C                |
| 35     | ACADSB     | chr10      | ENSG00000196177 | 5'Flank     |                         |
| 36     | ACAP3      | chr1       | ENSG00000131584 | Missense    | c.1873G>A               |
| 37     | ACBD6      | chr1       | ENSG00000230124 | 5'UTR       | c.-680T>A               |
| 38     | ACCS       | chr11      | ENSG00000110455 | Missense    | c.1459G>A               |
| 39     | ACCS       | chr11      | ENSG00000110455 | 3'UTR       | c.*284G>C               |
| 40     | ACOT12     | chr5       | ENSG00000172497 | Intron      | c.654-29C>T             |
| 41     | ACP2       | chr11      | ENSG00000134575 | Missense    | c.940G>C                |
| 42     | ACP4       | chr19      | ENSG00000142513 | Silent      | c.1044C>T               |
| 43     | ACSBG1     | chr15      | ENSG00000103740 | 3'UTR       | c.*3810C>T              |
| 44     | ACSL6      | chr5       | ENSG00000164398 | Missense    | c.1745C>T               |
| 45     | ACTL7A     | chr9       | ENSG00000187003 | Missense    | c.977C>G                |
| 46     | ACTN2      | chr1       | ENSG00000077522 | 3'UTR       | c.*359A>C               |
| 47     | ACTR2      | chr2       | ENSG00000138071 | Splice site | c.160-1G>A              |
| 48     | ACTR3B     | chr7       | ENSG00000133627 | Intron      | c.952-53G>A             |
| 49     | ACTR5      | chr20      | ENSG00000101442 | Missense    | c.1426C>G               |
| 50     | ACTR8      | chr3       | ENSG00000113812 | 3'UTR       | c.*363G>A               |
| 51     | ACTR8      | chr3       | ENSG00000113812 | Missense    | c.619G>A                |

| Number | Gene name | Chromosome | Gene_ID         | Mutation      | Nucleotide substitution |
|--------|-----------|------------|-----------------|---------------|-------------------------|
| 52     | ACVR2A    | chr2       | ENSG00000121989 | 3'UTR         | c.*832C>G               |
| 53     | ADA2      | chr22      | ENSG00000093072 | 5'UTR         | c.-73T>G                |
| 54     | ADAM12    | chr10      | ENSG00000148848 | 3'UTR         | c.*1495 *1496delinsAT   |
| 55     | ADAM12    | chr10      | ENSG00000148848 | Missense      | c.1711G>A               |
| 56     | ADAM23    | chr2       | ENSG00000114948 | 3'UTR         | c.*1646G>C              |
| 57     | ADAM23    | chr2       | ENSG00000114948 | 3'UTR         | c.*2136C>T              |
| 58     | ADAM28    | chr8       | ENSG00000042980 | 3'UTR         | c.*4130C>G              |
| 59     | ADAM28    | chr8       | ENSG00000042980 | 3'UTR         | c.*4558G>A              |
| 60     | ADAM29    | chr4       | ENSG00000168594 | Missense      | c.374G>A                |
| 61     | ADAM8     | chr10      | ENSG00000151651 | Missense      | c.1307A>C               |
| 62     | ADAMTS12  | chr5       | ENSG00000151388 | Silent        | c.1050C>T               |
| 63     | ADAP1     | chr7       | ENSG00000105963 | Intron        | c.214-388G>A            |
| 64     | ADARB2    | chr10      | ENSG00000185736 | 3'UTR         | c.*595G>A               |
| 65     | ADCY1     | chr7       | ENSG00000164742 | 3'UTR         | c.*961C>G               |
| 66     | ADCY10    | chr1       | ENSG00000143199 | Missense      | c.3460C>G               |
| 67     | ADCY4     | chr14      | ENSG00000129467 | Splice region | c.357+3G>A              |
| 68     | ADCY5     | chr3       | ENSG00000173175 | Silent        | c.1200G>A               |
| 69     | ADCY9     | chr16      | ENSG00000162104 | Missense      | c.419C>G                |
| 70     | ADD2      | chr2       | ENSG00000075340 | Intron        | c.475-23G>A             |
| 71     | ADGRD1    | chr12      | ENSG00000111452 | Intron        | c.104-14C>G             |
| 72     | ADGRF1    | chr6       | ENSG00000153292 | Splice region | c.552+6C>A              |
| 73     | ADGRL1    | chr19      | ENSG00000072071 | Missense      | c.820G>A                |
| 74     | ADGRL3    | chr4       | ENSG00000150471 | Intron        | c.587+9G>C              |
| 75     | ADK       | chr10      | ENSG00000156110 | Missense      | c.1018G>C               |
| 76     | ADNP      | chr20      | ENSG00000101126 | Silent        | c.1764A>T               |
| 77     | ADORA1    | chr1       | ENSG00000163485 | Nonsense      | c.17C>G                 |
| 78     | ADRA2A    | chr10      | ENSG00000150594 | Missense      | c.1215C>A               |
| 79     | AEBP1     | chr7       | ENSG00000106624 | Silent        | c.3114C>G               |
| 80     | AEBP1     | chr7       | ENSG00000106624 | 3'UTR         | c.*274C>T               |
| 81     | AFAP1     | chr4       | ENSG00000196526 | 3'UTR         | c.*611G>A               |
| 82     | AFAP1L1   | chr5       | ENSG00000157510 | Intron        | c.1698+25G>C            |
| 83     | AFDN      | chr6       | ENSG00000130396 | Nonsense      | c.2491G>T               |
| 84     | AFF2      | chrX       | ENSG00000155966 | 3'UTR         | c.*8743G>C              |
| 85     | AFF4      | chr5       | ENSG00000072364 | 3'UTR         | c.*3947G>C              |
| 86     | AFTPH     | chr2       | ENSG00000119844 | Intron        | c.2214+27C>T            |
| 87     | AGA       | chr4       | ENSG00000038002 | 3'UTR         | c.*411G>C               |
| 88     | AGAP1     | chr2       | ENSG00000157985 | Missense      | c.41C>A                 |
| 89     | AGAP2     | chr12      | ENSG00000135439 | Silent        | c.2484C>T               |
| 90     | AGFG1     | chr2       | ENSG00000173744 | Missense      | c.487C>G                |
| 91     | AGFG2     | chr7       | ENSG00000106351 | 3'UTR         | c.*1027C>G              |
| 92     | AGO4      | chr1       | ENSG00000134698 | 5'UTR         | c.-123C>G               |
| 93     | AGT       | chr1       | ENSG00000135744 | 3'UTR         | c.*357C>G               |
| 94     | AHCY      | chr20      | ENSG00000101444 | Nonstop       | c.1298G>C               |
| 95     | AHCYL2    | chr7       | ENSG00000158467 | Missense      | c.1663G>A               |
| 96     | AHCYL2    | chr7       | ENSG00000158467 | 3'UTR         | c.*2025C>G              |
| 97     | AHI1      | chr6       | ENSG00000135541 | Missense      | c.168G>C                |
| 98     | AHNAK2    | chr14      | ENSG00000185567 | Missense      | c.7360G>A               |
| 99     | AHNAK2    | chr14      | ENSG00000185567 | Silent        | c.7356T>C               |
| 100    | AJUBA     | chr14      | ENSG00000129474 | 3'UTR         | c.*274C>T               |
| 101    | AKAP13    | chr15      | ENSG00000170776 | Intron        | c.34-876C>G             |
| 102    | AKAP13    | chr15      | ENSG00000170776 | Missense      | c.3406C>G               |
| 103    | AKAP17A   | chrX       | ENSG00000197976 | Missense      | c.953G>C                |
| 104    | AKAP8     | chr19      | ENSG00000105127 | Silent        | c.564G>T                |

| Number | Gene name  | Chromosome | Gene_ID         | Mutation      | Nucleotide substitution |
|--------|------------|------------|-----------------|---------------|-------------------------|
| 105    | AKR1B15    | chr7       | ENSG00000227471 | Intron        | c.825+37C>G             |
| 106    | AL445250.1 | chr6       | ENSG00000225096 | Intron        | n.185-43268C>T          |
| 107    | AL583810.2 | chr14      | ENSG00000258811 | RNA           | n.430C>T                |
| 108    | AL589645.1 | chr9       | ENSG00000287368 | Intron        | n.140+20843C>G          |
| 109    | ALDH7A1    | chr5       | ENSG00000164904 | Intron        | c.192+749T>G            |
| 110    | ALDH9A1    | chr1       | ENSG00000143149 | Missense      | c.149C>T                |
| 111    | ALK        | chr2       | ENSG00000171094 | Missense      | c.977C>T                |
| 112    | ALMS1      | chr2       | ENSG00000116127 | Missense      | c.6973G>C               |
| 113    | ALPI       | chr2       | ENSG00000163295 | 3'UTR         | c.*644G>C               |
| 114    | ALPK3      | chr15      | ENSG00000136383 | Missense      | c.4228C>G               |
| 115    | AMER3      | chr2       | ENSG00000178171 | Missense      | c.503G>C                |
| 116    | AMER3      | chr2       | ENSG00000178171 | Missense      | c.590G>A                |
| 117    | AMER3      | chr2       | ENSG00000178171 | Silent        | c.2136G>A               |
| 118    | AMOTL2     | chr3       | ENSG00000114019 | 5'UTR         | c.-115C>T               |
| 119    | AMPD3      | chr11      | ENSG00000133805 | Splice region | c.1430+7G>A             |
| 120    | AMPH       | chr7       | ENSG00000078053 | 5'Flank       |                         |
| 121    | ANAPC5     | chr12      | ENSG00000089053 | Missense      | c.937C>T                |
| 122    | ANAPC7     | chr12      | ENSG00000196510 | Intron        | c.1235-341C>G           |
| 123    | ANGPT4     | chr20      | ENSG00000101280 | Silent        | c.663G>T                |
| 124    | ANGPTL3    | chr1       | ENSG00000132855 | Missense      | c.91C>G                 |
| 125    | ANK1       | chr8       | ENSG00000029534 | 3'UTR         | c.*2191C>G              |
| 126    | ANK2       | chr4       | ENSG00000145362 | Silent        | c.1249C>T               |
| 127    | ANK2       | chr4       | ENSG00000145362 | 5'UTR         | c.-83G>C                |
| 128    | ANK2       | chr4       | ENSG00000145362 | Missense      | c.3511G>C               |
| 129    | ANK3       | chr10      | ENSG00000151150 | Missense      | c.9613G>C               |
| 130    | ANK3       | chr10      | ENSG00000151150 | Missense      | c.3015G>A               |
| 131    | ANK3       | chr10      | ENSG00000151150 | 3'UTR         | c.*164G>C               |
| 132    | ANK3       | chr10      | ENSG00000151150 | Splice site   | c.997-1G>C              |
| 133    | ANKEF1     | chr20      | ENSG00000132623 | 3'UTR         | c.*99C>G                |
| 134    | ANKH       | chr5       | ENSG00000154122 | 3'UTR         | c.*598G>A               |
| 135    | ANKRD26P1  | chr16      | ENSG00000261239 | Intron        | n.1543+111C>A           |
| 136    | ANKRD44    | chr2       | ENSG00000065413 | Missense      | c.850C>G                |
| 137    | ANKRD52    | chr12      | ENSG00000139645 | 3'UTR         | c.*2971C>G              |
| 138    | ANKRD6     | chr6       | ENSG00000135299 | 5'UTR         | c.-124C>T               |
| 139    | ANKS1A     | chr6       | ENSG00000064999 | Intron        | c.2011-14374G>C         |
| 140    | ANXA1      | chr9       | ENSG00000135046 | Silent        | c.138G>C                |
| 141    | ANXA11     | chr10      | ENSG00000122359 | 3'UTR         | c.*1190G>A              |
| 142    | AP001042.1 | chr21      | ENSG00000205622 | RNA           | n.2404C>T               |
| 143    | AP2M1      | chr3       | ENSG00000161203 | 3'UTR         | c.*469G>C               |
| 144    | AP3B2      | chr15      | ENSG00000103723 | Intron        | c.2977+25G>A            |
| 145    | AP3M1      | chr10      | ENSG00000185009 | 3'UTR         | c.*1310C>G              |
| 146    | AP3M2      | chr8       | ENSG00000070718 | Missense      | c.331G>C                |
| 147    | AP4E1      | chr15      | ENSG00000081014 | 3'UTR         | c.*1852G>A              |
| 148    | APAF1      | chr12      | ENSG00000120868 | Missense      | c.784C>G                |
| 149    | APC        | chr5       | ENSG00000134982 | 3'UTR         | c.*597G>A               |
| 150    | APLP1      | chr19      | ENSG00000105290 | Silent        | c.1758G>A               |
| 151    | APP        | chr21      | ENSG00000142192 | 5'UTR         | c.-158C>T               |
| 152    | AQP2       | chr12      | ENSG00000167580 | 3'UTR         | c.*855G>C               |
| 153    | ARFGEF1    | chr8       | ENSG00000066777 | Missense      | c.4552G>C               |
| 154    | ARFGEF1    | chr8       | ENSG00000066777 | Intron        | c.4339-15G>T            |
| 155    | ARFGEF3    | chr6       | ENSG00000112379 | Intron        | c.352-20C>G             |
| 156    | ARHGAP15   | chr2       | ENSG00000075884 | Splice region | c.-14-3C>G              |
| 157    | ARHGAP19   | chr10      | ENSG00000213390 | 3'UTR         | c.*3800G>C              |

| Number | Gene name    | Chromosome | Gene_ID         | Mutation      | Nucleotide substitution |
|--------|--------------|------------|-----------------|---------------|-------------------------|
| 158    | ARHGAP26     | chr5       | ENSG00000145819 | Missense      | c.82G>C                 |
| 159    | ARHGAP26     | chr5       | ENSG00000145819 | 3'UTR         | c.*1888C>G              |
| 160    | 27P1-BPTFP1- | chr17      | ENSG00000215769 | RNA           | n.1063C>G               |
| 161    | ARHGAP28     | chr18      | ENSG00000088756 | Silent        | c.1338C>G               |
| 162    | ARHGAP39     | chr8       | ENSG00000147799 | Missense      | c.2524A>G               |
| 163    | ARHGEF11     | chr1       | ENSG00000132694 | Silent        | c.3579C>T               |
| 164    | ARHGEF11     | chr1       | ENSG00000132694 | Intron        | c.1985+33C>T            |
| 165    | ARHGEF33     | chr2       | ENSG00000214694 | 3'UTR         | c.*730G>T               |
| 166    | ARHGEF40     | chr14      | ENSG00000165801 | Splice region | c.2035-3C>T             |
| 167    | ARL6IP1      | chr16      | ENSG00000170540 | 3'UTR         | c.*1136C>G              |
| 168    | ARMC10P1     | chr3       | ENSG00000178660 | 3'Flank       |                         |
| 169    | ARMC4        | chr10      | ENSG00000169126 | Intron        | c.*40+82G>C             |
| 170    | ARMC9        | chr2       | ENSG00000135931 | Intron        | c.2132-9C>A             |
| 171    | ARMCX4       | chrX       | ENSG00000196440 | Silent        | c.2184C>T               |
| 172    | ARNT2        | chr15      | ENSG00000172379 | Missense      | c.1279G>A               |
| 173    | ARNTL2       | chr12      | ENSG00000029153 | Intron        | c.183-3843G>C           |
| 174    | ARNTL2       | chr12      | ENSG00000029153 | Splice site   | c.631+1G>T              |
| 175    | ARPC1B       | chr7       | ENSG00000130429 | Splice region | c.987C>G                |
| 176    | ARRB1        | chr11      | ENSG00000137486 | 3'UTR         | c.*1702G>C              |
| 177    | ARRDC5       | chr19      | ENSG00000205784 | Silent        | c.972C>G                |
| 178    | ARSH         | chrX       | ENSG00000205667 | Splice region | c.902-4C>G              |
| 179    | ASAP1        | chr8       | ENSG00000153317 | 3'UTR         | c.*2487G>C              |
| 180    | ASCL4        | chr12      | ENSG00000187855 | 5'UTR         | c.-189G>T               |
| 181    | ASPH         | chr8       | ENSG00000198363 | Silent        | c.2208G>C               |
| 182    | ASPHD2       | chr22      | ENSG00000128203 | 3'UTR         | c.*637C>G               |
| 183    | ASPN         | chr9       | ENSG00000106819 | Splice region | c.276T>G                |
| 184    | ATAD2B       | chr2       | ENSG00000119778 | Missense      | c.2278C>T               |
| 185    | ATAD3A       | chr1       | ENSG00000197785 | 5'Flank       |                         |
| 186    | ATE1         | chr10      | ENSG00000107669 | 3'UTR         | c.*2973G>C              |
| 187    | ATF2         | chr2       | ENSG00000115966 | Intron        | c.978+31C>G             |
| 188    | ATF6         | chr1       | ENSG00000118217 | 3'UTR         | c.*661G>C               |
| 189    | ATG13        | chr11      | ENSG00000175224 | Intron        | c.499+9C>G              |
| 190    | ATG13        | chr11      | ENSG00000175224 | Missense      | c.1264C>T               |
| 191    | ATG16L2      | chr11      | ENSG00000168010 | Intron        | c.644+17C>A             |
| 192    | ATG16L2      | chr11      | ENSG00000168010 | Missense      | c.39C>T                 |
| 193    | ATG2A        | chr11      | ENSG00000110046 | Silent        | c.4782C>G               |
| 194    | ATG2A        | chr11      | ENSG00000110046 | Intron        | c.3778-30C>G            |
| 195    | ATG4B        | chr2       | ENSG00000168397 | 3'UTR         | c.*229G>A               |
| 196    | ATG4B        | chr2       | ENSG00000168397 | 3'UTR         | c.*708G>C               |
| 197    | ATG5         | chr6       | ENSG00000057663 | 3'UTR         | c.*1122C>T              |
| 198    | ATG9A        | chr2       | ENSG00000198925 | 5'UTR         | c.-47C>T                |
| 199    | ATIC         | chr2       | ENSG00000138363 | Missense      | c.1039G>A               |
| 200    | ATIC         | chr2       | ENSG00000138363 | Silent        | c.1778G>A               |
| 201    | ATMIN        | chr16      | ENSG00000166454 | Missense      | c.719C>G                |
| 202    | ATP11C       | chrX       | ENSG00000101974 | 3'UTR         | c.*1079G>A              |
| 203    | ATP11C       | chrX       | ENSG00000101974 | 5'UTR         | c.-748G>A               |
| 204    | ATP1A4       | chr1       | ENSG00000132681 | Silent        | c.2548C>T               |
| 205    | ATP2B4       | chr1       | ENSG00000058668 | Intron        | c.392-17C>T             |
| 206    | ATP2C2       | chr16      | ENSG00000064270 | Intron        | c.1929+39C>T            |
| 207    | ATP5F1B      | chr12      | ENSG00000110955 | Missense      | c.1342G>A               |
| 208    | ATP5F1C      | chr10      | ENSG00000165629 | Intron        | c.223+10G>C             |
| 209    | ATP6V0B      | chr1       | ENSG00000117410 | Silent        | c.785G>A                |
| 210    | ATP6V0C      | chr16      | ENSG00000185883 | 5'UTR         | c.-76C>T                |

| Number | Gene name | Chromosome | Gene_ID         | Mutation      | Nucleotide substitution |
|--------|-----------|------------|-----------------|---------------|-------------------------|
| 211    | ATP6V1A   | chr3       | ENSG00000114573 | Silent        | c.1206G>C               |
| 212    | ATP6V1G1  | chr9       | ENSG00000136888 | 5'UTR         | c.-46C>G                |
| 213    | ATP8B3    | chr19      | ENSG00000130270 | Silent        | c.1656C>G               |
| 214    | ATXN2     | chr12      | ENSG00000204842 | 5'Flank       |                         |
| 215    | ATXN2L    | chr16      | ENSG00000168488 | 5'UTR         | c.-184C>T               |
| 216    | ATXN3     | chr14      | ENSG00000066427 | 3'UTR         | c.*1923G>A              |
| 217    | AURKC     | chr19      | ENSG00000105146 | Missense      | c.271G>A                |
| 218    | AVPR1A    | chr12      | ENSG00000166148 | Silent        | c.543G>A                |
| 219    | B3GALT5   | chr21      | ENSG00000183778 | 3'UTR         | c.*679C>T               |
| 220    | B3GNT5    | chr3       | ENSG00000176597 | Missense      | c.314C>A                |
| 221    | B3GNT8    | chr19      | ENSG00000177191 | Silent        | c.828C>G                |
| 222    | B4GALNT4  | chr11      | ENSG00000182272 | Missense      | c.1234G>A               |
| 223    | BACE2     | chr21      | ENSG00000182240 | Intron        | .312+10976 312+10978dur |
| 224    | BAHCC1    | chr17      | ENSG00000266074 | Intron        | c.178+11253C>G          |
| 225    | BAHCC1    | chr17      | ENSG00000266074 | Splice region | c.5796+3G>T             |
| 226    | BAIAP3    | chr16      | ENSG00000007516 | Intron        | c.324+82C>T             |
| 227    | BAZ1A     | chr14      | ENSG00000198604 | 5'UTR         | c.-345C>T               |
| 228    | BBC3      | chr19      | ENSG00000105327 | Missense      | c.220C>G                |
| 229    | BBS10     | chr12      | ENSG00000179941 | 3'UTR         | c.*464G>C               |
| 230    | BCAS1     | chr20      | ENSG00000064787 | 3'UTR         | c.*3658G>T              |
| 231    | BCAS1     | chr20      | ENSG00000064787 | 3'UTR         | c.*3652G>C              |
| 232    | BCAS1     | chr20      | ENSG00000064787 | 3'UTR         | c.*3274G>T              |
| 233    | BCL10     | chr1       | ENSG00000142867 | 3'UTR         | c.*590C>G               |
| 234    | BCL2L11   | chr2       | ENSG00000153094 | Missense      | c.171C>A                |
| 235    | BCL7B     | chr7       | ENSG00000106635 | Intron        | c.265+569C>G            |
| 236    | BCOR      | chrX       | ENSG00000183337 | Missense      | c.1190C>G               |
| 237    | BEST1     | chr11      | ENSG00000167995 | Missense      | c.1335G>T               |
| 238    | BHLHE41   | chr12      | ENSG00000123095 | Missense      | c.242G>C                |
| 239    | BICDL1    | chr12      | ENSG00000135127 | Intron        | c.1560+850C>T           |
| 240    | BICDL2    | chr16      | ENSG00000162069 | Intron        | c.-31+298G>C            |
| 241    | BICRA     | chr19      | ENSG00000063169 | Missense      | c.2821C>T               |
| 242    | BLM       | chr15      | ENSG00000197299 | Nonsense      | c.311C>G                |
| 243    | BLM       | chr15      | ENSG00000197299 | Missense      | c.1843C>G               |
| 244    | BLZF1     | chr1       | ENSG00000117475 | Nonsense      | c.364G>T                |
| 245    | BLZF1     | chr1       | ENSG00000117475 | Missense      | c.409G>A                |
| 246    | BMI1      | chr10      | ENSG00000168283 | 3'UTR         | c.*767C>T               |
| 247    | BMPR1B    | chr4       | ENSG00000138696 | Intron        | c.73+54G>C              |
| 248    | BMT2      | chr7       | ENSG00000164603 | Missense      | c.1007G>C               |
| 249    | BNC1      | chr15      | ENSG00000169594 | 3'UTR         | c.*470G>A               |
| 250    | BNIP2     | chr15      | ENSG00000140299 | 3'UTR         | c.*1801G>A              |
| 251    | BNIP1     | chr1       | ENSG00000163141 | Intron        | c.792-113C>G            |
| 252    | BPIFC     | chr22      | ENSG00000184459 | 3'UTR         | c.*35G>C                |
| 253    | BRAF      | chr7       | ENSG00000157764 | Missense      | c.1925C>G               |
| 254    | BRCA1     | chr17      | ENSG00000012048 | Missense      | c.1274C>G               |
| 255    | BRI3BP    | chr12      | ENSG00000184992 | 3'UTR         | c.*3457C>G              |
| 256    | BRI3BP    | chr12      | ENSG00000184992 | 3'UTR         | c.*4685C>T              |
| 257    | BRMS1     | chr11      | ENSG00000174744 | Splice site   | c.140-1G>C              |
| 258    | BRWD1     | chr21      | ENSG00000185658 | Missense      | c.2830C>G               |
| 259    | BRWD1     | chr21      | ENSG00000185658 | 3'UTR         | c.*243G>C               |
| 260    | BRWD3     | chrX       | ENSG00000165288 | Missense      | c.3586G>C               |
| 261    | BTBD18    | chr11      | ENSG00000233436 | Missense      | c.306A>C                |
| 262    | BTD       | chr3       | ENSG00000169814 | 3'UTR         | c.*2178C>T              |
| 263    | BTF3L4    | chr1       | ENSG00000134717 | 3'UTR         | c.*3581G>C              |

| Number | Gene name | Chromosome | Gene_ID         | Mutation      | Nucleotide substitution |
|--------|-----------|------------|-----------------|---------------|-------------------------|
| 264    | BTG1      | chr12      | ENSG00000133639 | 3'UTR         | c.*1505G>C              |
| 265    | BTNL9     | chr5       | ENSG00000165810 | Missense      | c.1513C>G               |
| 266    | BUB1B     | chr15      | ENSG00000156970 | Missense      | c.1990C>G               |
| 267    | BUD23     | chr7       | ENSG00000071462 | Silent        | c.843C>T                |
| 268    | C10orf113 | chr10      | ENSG00000204683 | Missense      | c.421G>C                |
| 269    | C10orf120 | chr10      | ENSG00000183559 | Missense      | c.69A>T                 |
| 270    | C11orf80  | chr11      | ENSG00000173715 | Missense      | c.1031C>T               |
| 271    | C11orf96  | chr11      | ENSG00000187479 | Intron        | c.300+72C>T             |
| 272    | C16orf97  | chr16      | ENSG00000261190 | Intron        | n.76+24G>C              |
| 273    | C1orf105  | chr1       | ENSG00000180999 | Intron        | c.199-3614G>C           |
| 274    | C1orf141  | chr1       | ENSG00000203963 | Nonsense      | c.1060G>T               |
| 275    | C1orf226  | chr1       | ENSG00000239887 | 3'UTR         | c.*642C>T               |
| 276    | C1orf56   | chr1       | ENSG00000143443 | Missense      | c.689C>T                |
| 277    | C1orf61   | chr1       | ENSG00000125462 | 3'UTR         | c.*219T>A               |
| 278    | C1orf94   | chr1       | ENSG00000142698 | Splice region | c.1152-6T>G             |
| 279    | C1QC      | chr1       | ENSG00000159189 | Silent        | c.201G>A                |
| 280    | C1QL4     | chr12      | ENSG00000186897 | 5'UTR         | c.-242G>C               |
| 281    | C1QTNF6   | chr22      | ENSG00000133466 | Intron        | c.51+42G>C              |
| 282    | C1QTNF7   | chr4       | ENSG00000163145 | 3'UTR         | c.*2283C>G              |
| 283    | C1QTNF7   | chr4       | ENSG00000163145 | 3'UTR         | c.*2796G>A              |
| 284    | C20orf144 | chr20      | ENSG00000149609 | Silent        | c.99C>A                 |
| 285    | C22orf34  | chr22      | ENSG00000188511 | RNA           | n.1010C>T               |
| 286    | C2orf78   | chr2       | ENSG00000187833 | Missense      | c.664C>G                |
| 287    | C3orf20   | chr3       | ENSG00000131379 | Missense      | c.25G>C                 |
| 288    | C4orf54   | chr4       | ENSG00000248713 | Missense      | c.2758G>A               |
| 289    | C4orf54   | chr4       | ENSG00000248713 | Silent        | c.222C>T                |
| 290    | C5orf22   | chr5       | ENSG00000082213 | 3'UTR         | c.*1337C>G              |
| 291    | C7        | chr5       | ENSG00000112936 | Nonsense      | c.365C>G                |
| 292    | C7orf25   | chr7       | ENSG00000136197 | 5'UTR         | c.-451G>C               |
| 293    | C8orf34   | chr8       | ENSG00000165084 | Missense      | c.54C>G                 |
| 294    | C9orf135  | chr9       | ENSG00000204711 | Intron        | c.508-3716C>G           |
| 295    | C9orf72   | chr9       | ENSG00000147894 | Missense      | c.468G>T                |
| 296    | CA14      | chr1       | ENSG00000118298 | Intron        | c.948-19G>C             |
| 297    | CA9       | chr9       | ENSG00000107159 | Missense      | c.779C>T                |
| 298    | CAAP1     | chr9       | ENSG00000120159 | 3'UTR         | c.*1313T>G              |
| 299    | CAAP1     | chr9       | ENSG00000120159 | Missense      | c.1026G>C               |
| 300    | CACNA1A   | chr19      | ENSG00000141837 | Splice region | c.3553+3G>C             |
| 301    | CACNA1A   | chr19      | ENSG00000141837 | Missense      | c.955G>C                |
| 302    | CACNA1D   | chr3       | ENSG00000157388 | Silent        | c.2706C>A               |
| 303    | CACNA1E   | chr1       | ENSG00000198216 | 3'UTR         | c.*1251G>T              |
| 304    | CACNA1F   | chrX       | ENSG00000102001 | Nonsense      | c.73G>T                 |
| 305    | CACNA2D1  | chr7       | ENSG00000153956 | Intron        | c.3112+58C>T            |
| 306    | CACNB1    | chr17      | ENSG00000067191 | Intron        | c.1333-42C>T            |
| 307    | CACNB1    | chr17      | ENSG00000067191 | Intron        | c.629-11C>G             |
| 308    | CACNB1    | chr17      | ENSG00000067191 | 5'UTR         | c.-128G>A               |
| 309    | CACNB4    | chr2       | ENSG00000182389 | 3'UTR         | c.*4993C>G              |
| 310    | CACNB4    | chr2       | ENSG00000182389 | Intron        | c.521+39G>C             |
| 311    | CACNG6    | chr19      | ENSG00000130433 | Missense      | c.603G>C                |
| 312    | CAD       | chr2       | ENSG00000084774 | 5'UTR         | c.-26C>T                |
| 313    | CADPS2    | chr7       | ENSG00000081803 | 5'UTR         | c.-329C>A               |
| 314    | CALB2     | chr16      | ENSG00000172137 | Intron        | c.261+14C>T             |
| 315    | CALCRL    | chr2       | ENSG00000064989 | 3'UTR         | c.*549G>T               |
| 316    | CALD1     | chr7       | ENSG00000122786 | Splice site   | c.72-1G>A               |

| Number | Gene name | Chromosome | Gene_ID         | Mutation | Nucleotide substitution |
|--------|-----------|------------|-----------------|----------|-------------------------|
| 317    | CALM3     | chr19      | ENSG00000160014 | Intron   | c.422-45T>G             |
| 318    | CALN1     | chr7       | ENSG00000183166 | 3'UTR    | c.*1370G>A              |
| 319    | CALN1     | chr7       | ENSG00000183166 | 3'UTR    | c.*441C>A               |
| 320    | CAMK2D    | chr4       | ENSG00000145349 | 5'UTR    | c.-43C>G                |
| 321    | CAMSAP1   | chr9       | ENSG00000130559 | Intron   | c.-107-92C>T            |
| 322    | CAMSAP3   | chr19      | ENSG00000076826 | Missense | c.3055C>T               |
| 323    | CAMSAP3   | chr19      | ENSG00000076826 | Missense | c.3663G>C               |
| 324    | CAND1     | chr12      | ENSG00000111530 | 3'UTR    | c.*649C>G               |
| 325    | CAPN12    | chr19      | ENSG00000182472 | Intron   | c.730-22C>T             |
| 326    | CAPN15    | chr16      | ENSG00000103326 | Silent   | c.2031C>T               |
| 327    | CAPN5     | chr11      | ENSG00000149260 | Intron   | c.1288-39C>T            |
| 328    | CAPRIN1   | chr11      | ENSG00000135387 | 3'UTR    | c.*504 *508dup          |
| 329    | CARD14    | chr17      | ENSG00000141527 | Intron   | c.2570-31C>G            |
| 330    | CARF      | chr2       | ENSG00000138380 | Missense | c.901C>T                |
| 331    | CARMIL2   | chr16      | ENSG00000159753 | Silent   | c.918G>C                |
| 332    | CARMIL3   | chr14      | ENSG00000186648 | 5'Flank  |                         |
| 333    | CASTOR1   | chr22      | ENSG00000239282 | Missense | c.332C>T                |
| 334    | CASTOR2   | chr7       | ENSG00000274070 | 3'UTR    | c.*3777G>C              |
| 335    | CASZ1     | chr1       | ENSG00000130940 | Missense | c.3229G>A               |
| 336    | CATSPER2  | chr15      | ENSG00000166762 | 3'UTR    | c.*2162G>T              |
| 337    | CBFA2T2   | chr20      | ENSG00000078699 | Intron   | c.34+55C>T              |
| 338    | CBFA2T2   | chr20      | ENSG00000078699 | 3'UTR    | c.*126G>A               |
| 339    | CBFA2T2   | chr20      | ENSG00000078699 | 3'UTR    | c.*2374G>A              |
| 340    | CBX6      | chr22      | ENSG00000183741 | 3'UTR    | c.*3545C>G              |
| 341    | CC2D1A    | chr19      | ENSG00000132024 | Missense | c.1915G>C               |
| 342    | CCDC113   | chr16      | ENSG00000103021 | Silent   | c.588C>G                |
| 343    | CCDC130   | chr19      | ENSG00000104957 | Missense | c.608G>C                |
| 344    | CCDC134   | chr22      | ENSG00000100147 | 3'UTR    | c.*338G>T               |
| 345    | CCDC136   | chr7       | ENSG00000128596 | Silent   | c.3150G>A               |
| 346    | CCDC140   | chr2       | ENSG00000163081 | 3'UTR    | c.*496C>T               |
| 347    | CCDC158   | chr4       | ENSG00000163749 | Missense | c.324G>C                |
| 348    | CCDC171   | chr9       | ENSG00000164989 | Missense | c.2723C>G               |
| 349    | CCDC180   | chr9       | ENSG00000197816 | Intron   | c.1793+33G>A            |
| 350    | CCDC184   | chr12      | ENSG00000177875 | 3'UTR    | c.*1171C>G              |
| 351    | CCDC3     | chr10      | ENSG00000151468 | 3'UTR    | c.*681G>A               |
| 352    | CCDC30    | chr1       | ENSG00000186409 | 3'UTR    | c.*91G>C                |
| 353    | CCDC39    | chr3       | ENSG00000284862 | Missense | c.241G>A                |
| 354    | CCDC6     | chr10      | ENSG00000108091 | Missense | c.92C>T                 |
| 355    | CCDC65    | chr12      | ENSG00000139537 | 3'UTR    | c.*90G>C                |
| 356    | CCDC69    | chr5       | ENSG00000198624 | Silent   | c.669T>C                |
| 357    | CCDC7     | chr10      | ENSG00000216937 | Intron   | c.2123-10306G>A         |
| 358    | CCDC85A   | chr2       | ENSG00000055813 | Missense | c.583C>A                |
| 359    | CCDC88A   | chr2       | ENSG00000115355 | Missense | c.3961G>C               |
| 360    | CCDC97    | chr19      | ENSG00000142039 | 5'UTR    | c.-1G>C                 |
| 361    | CCER1     | chr12      | ENSG00000197651 | 3'UTR    | c.*1069C>G              |
| 362    | CCER1     | chr12      | ENSG00000197651 | 3'UTR    | c.*484C>G               |
| 363    | CCNB2     | chr15      | ENSG00000157456 | Intron   | c.976-35C>T             |
| 364    | CCNC      | chr6       | ENSG00000112237 | 3'UTR    | c.*554C>T               |
| 365    | CCNL2     | chr1       | ENSG00000221978 | Silent   | c.1392G>A               |
| 366    | CCNYL1    | chr2       | ENSG00000163249 | 3'UTR    | c.*1364C>G              |
| 367    | CCPG1     | chr15      | ENSG00000260916 | Intron   | c.176-49G>A             |
| 368    | CCR6      | chr6       | ENSG00000112486 | Missense | c.1017G>T               |
| 369    | CCT6A     | chr7       | ENSG00000146731 | Silent   | c.66C>T                 |

| Number | Gene name | Chromosome | Gene_ID         | Mutation      | Nucleotide substitution |
|--------|-----------|------------|-----------------|---------------|-------------------------|
| 370    | CD109     | chr6       | ENSG00000156535 | Missense      | c.2431C>T               |
| 371    | CD177     | chr19      | ENSG00000204936 | Missense      | c.393G>C                |
| 372    | CD44      | chr11      | ENSG00000026508 | 3'UTR         | c.*317C>T               |
| 373    | CD46      | chr1       | ENSG00000117335 | Silent        | c.564T>G                |
| 374    | CD47      | chr3       | ENSG00000196776 | 3'UTR         | c.*1794G>C              |
| 375    | CD86      | chr3       | ENSG00000114013 | 3'UTR         | c.*625G>A               |
| 376    | CDADC1    | chr13      | ENSG00000102543 | 3'UTR         | c.*1471C>G              |
| 377    | CDC14A    | chr1       | ENSG00000079335 | Missense      | c.601G>C                |
| 378    | CDC20B    | chr5       | ENSG00000164287 | Intron        | c.63+100C>G             |
| 379    | CDH26     | chr20      | ENSG00000124215 | Silent        | c.1479C>T               |
| 380    | CDH6      | chr5       | ENSG00000113361 | 3'UTR         | c.*5808G>C              |
| 381    | CDH8      | chr16      | ENSG00000150394 | Missense      | c.1270C>G               |
| 382    | CDHR3     | chr7       | ENSG00000128536 | 5'UTR         | c.-121G>C               |
| 383    | CDHR3     | chr7       | ENSG00000128536 | Missense      | c.592G>C                |
| 384    | CDK11B    | chr1       | ENSG00000248333 | Missense      | c.260G>A                |
| 385    | CDK19     | chr6       | ENSG00000155111 | Intron        | c.25-123del             |
| 386    | CDK3      | chr17      | ENSG00000250506 | 5'UTR         | c.-59C>T                |
| 387    | CDKL2     | chr4       | ENSG00000138769 | Intron        | c.1020+17C>T            |
| 388    | CDKL3     | chr5       | ENSG00000006837 | Missense      | c.1670C>T               |
| 389    | CDR1      | chrX       | ENSG00000184258 | Missense      | c.135G>C                |
| 390    | CEBPB     | chr20      | ENSG00000172216 | 5'UTR         | c.-1C>T                 |
| 391    | CEBPB     | chr20      | ENSG00000172216 | Missense      | c.1022C>A               |
| 392    | CEBPZ     | chr2       | ENSG00000115816 | 5'UTR         | c.-23C>G                |
| 393    | CELA3A    | chr1       | ENSG00000142789 | Intron        | c.362+285C>T            |
| 394    | CENPC     | chr4       | ENSG00000145241 | Missense      | c.2401C>G               |
| 395    | CEP128    | chr14      | ENSG00000100629 | 3'UTR         | c.*931G>T               |
| 396    | CEP162    | chr6       | ENSG00000135315 | Silent        | c.336A>G                |
| 397    | CEP164    | chr11      | ENSG00000110274 | 3'UTR         | c.*582C>G               |
| 398    | CEP57     | chr11      | ENSG00000166037 | Missense      | c.88C>T                 |
| 399    | CEP57L1   | chr6       | ENSG00000183137 | 3'UTR         | c.*1818G>C              |
| 400    | CEP78     | chr9       | ENSG00000148019 | Intron        | c.499+24C>G             |
| 401    | CERCAM    | chr9       | ENSG00000167123 | Missense      | c.515A>T                |
| 402    | CERS5     | chr12      | ENSG00000139624 | Intron        | c.493-26G>A             |
| 403    | CERS5     | chr12      | ENSG00000139624 | Intron        | c.493-33G>T             |
| 404    | CERT1     | chr5       | ENSG00000113163 | 5'UTR         | c.-160G>A               |
| 405    | CERT1     | chr5       | ENSG00000113163 | 5'UTR         | c.-166G>C               |
| 406    | CES3      | chr16      | ENSG00000172828 | Silent        | c.648C>T                |
| 407    | CFAP100   | chr3       | ENSG00000163885 | Intron        | c.419-28C>T             |
| 408    | CFAP100   | chr3       | ENSG00000163885 | Splice region | c.1083-8C>G             |
| 409    | CFAP47    | chrX       | ENSG00000165164 | Missense      | c.8011G>A               |
| 410    | CFAP65    | chr2       | ENSG00000181378 | Silent        | c.1836C>A               |
| 411    | CFAP99    | chr4       | ENSG00000206113 | Intron        | c.795+47C>G             |
| 412    | CFAP99    | chr4       | ENSG00000206113 | Missense      | c.449C>T                |
| 413    | CFHR3     | chr1       | ENSG00000116785 | Intron        | c.563-14G>C             |
| 414    | CFL1      | chr11      | ENSG00000172757 | 5'UTR         | c.-347C>G               |
| 415    | CFL2      | chr14      | ENSG00000165410 | Intron        | c.4-70C>G               |
| 416    | CFL2      | chr14      | ENSG00000165410 | 5'UTR         | c.-54C>T                |
| 417    | CFP       | chrX       | ENSG00000126759 | Missense      | c.683A>G                |
| 418    | CGN       | chr1       | ENSG00000143375 | Intron        | c.2905-12C>G            |
| 419    | CGN       | chr1       | ENSG00000143375 | 3'UTR         | c.*1259C>G              |
| 420    | CGRRF1    | chr14      | ENSG00000100532 | 3'UTR         | c.*318G>C               |
| 421    | CHD1L     | chr1       | ENSG00000131778 | Missense      | c.1182A>C               |
| 422    | CHD2      | chr15      | ENSG00000173575 | Intron        | c.1198+33C>T            |



| Number | Gene name | Chromosome | Gene_ID         | Mutation      | Nucleotide substitution |
|--------|-----------|------------|-----------------|---------------|-------------------------|
| 423    | CHD2      | chr15      | ENSG00000173575 | Intron        | c.3414-39C>A            |
| 424    | CHD5      | chr1       | ENSG00000116254 | 5'UTR         | c.-90C>T                |
| 425    | CHD6      | chr20      | ENSG00000124177 | Intron        | c.-88+31C>T             |
| 426    | CHD7      | chr8       | ENSG00000171316 | Missense      | c.3774C>G               |
| 427    | CHD9      | chr16      | ENSG00000177200 | Missense      | c.7744G>T               |
| 428    | CHIC1     | chrX       | ENSG00000204116 | 5'UTR         | c.-78C>A                |
| 429    | CHIC1     | chrX       | ENSG00000204116 | 3'UTR         | c.*373G>A               |
| 430    | CHML      | chr1       | ENSG00000203668 | 3'UTR         | c.*1999C>T              |
| 431    | CHPF2     | chr7       | ENSG00000033100 | Missense      | c.2299G>C               |
| 432    | CHRNA1    | chr2       | ENSG00000138435 | Missense      | c.1285G>C               |
| 433    | CHRNA10   | chr11      | ENSG00000129749 | 3'UTR         | c.*122G>C               |
| 434    | CHRNA3    | chr15      | ENSG00000080644 | 5'UTR         | c.-464G>C               |
| 435    | CHTOP     | chr1       | ENSG00000160679 | Intron        | c.65+32C>G              |
| 436    | CHURC1    | chr14      | ENSG00000258289 | 3'UTR         | c.*217G>A               |
| 437    | CIAO2A    | chr15      | ENSG00000166797 | 3'UTR         | c.*1154C>T              |
| 438    | CIITA     | chr16      | ENSG00000179583 | Missense      | c.1616G>A               |
| 439    | CIP2A     | chr3       | ENSG00000163507 | 3'UTR         | c.*444G>C               |
| 440    | CLCA2     | chr1       | ENSG00000137975 | Intron        | c.1488+14C>A            |
| 441    | CLCF1     | chr11      | ENSG00000175505 | Intron        | c.183+51G>A             |
| 442    | CLCN2     | chr3       | ENSG00000114859 | Missense      | c.1423G>A               |
| 443    | CLCN3     | chr4       | ENSG00000109572 | Silent        | c.1368C>T               |
| 444    | CLCN7     | chr16      | ENSG00000103249 | Intron        | c.1082-10C>T            |
| 445    | CLDN4     | chr7       | ENSG00000189143 | 5'UTR         | c.-1791C>T              |
| 446    | CLEC3A    | chr16      | ENSG00000166509 | Missense      | c.20T>C                 |
| 447    | CLIP1     | chr12      | ENSG00000130779 | Splice region | c.3934-3C>T             |
| 448    | CLK1      | chr2       | ENSG00000013441 | Intron        | c.1311+37G>C            |
| 449    | CLUU1OS   | chr12      | ENSG00000205057 | Intron        | c.53-1365C>G            |
| 450    | CLN3      | chr16      | ENSG00000188603 | Intron        | c.222+523G>A            |
| 451    | CLPB      | chr11      | ENSG00000162129 | Missense      | c.994G>C                |
| 452    | CLSTN2    | chr3       | ENSG00000158258 | Intron        | c.1223-58C>G            |
| 453    | CLTC      | chr17      | ENSG00000141367 | Intron        | c.519+31G>C             |
| 454    | CLTRN     | chrX       | ENSG00000147003 | Nonstop       | c.668G>T                |
| 455    | CLUAP1    | chr16      | ENSG00000103351 | Intron        | c.928+70G>C             |
| 456    | CMPK2     | chr2       | ENSG00000134326 | Missense      | c.1289C>G               |
| 457    | CMTM1     | chr16      | ENSG00000089505 | Intron        | c.690+88C>G             |
| 458    | CNGA3     | chr2       | ENSG00000144191 | 3'UTR         | c.*658A>T               |
| 459    | CNKSR2    | chrX       | ENSG00000149970 | Intron        | c.1886+14G>C            |
| 460    | CNMD      | chr13      | ENSG00000136110 | Intron        | c.354+23G>C             |
| 461    | CNN3      | chr1       | ENSG00000117519 | 5'UTR         | c.-279C>G               |
| 462    | CNNM1     | chr10      | ENSG00000119946 | 3'UTR         | c.*192G>C               |
| 463    | CNOT6     | chr5       | ENSG00000113300 | 3'UTR         | c.*1551G>C              |
| 464    | CNOT6L    | chr4       | ENSG00000138767 | 3'UTR         | c.*5663G>A              |
| 465    | CNPPD1    | chr2       | ENSG00000115649 | 3'UTR         | c.*617C>G               |
| 466    | CNRIP1    | chr2       | ENSG00000119865 | 3'UTR         | c.*144C>G               |
| 467    | CNTNAP5   | chr2       | ENSG00000155052 | Missense      | c.3484G>A               |
| 468    | CNTRL     | chr9       | ENSG00000119397 | Intron        | c.1651-20G>A            |
| 469    | COL11A1   | chr1       | ENSG00000060718 | Intron        | c.3268-24C>G            |
| 470    | COL12A1   | chr6       | ENSG00000111799 | Silent        | c.3069C>G               |
| 471    | COL16A1   | chr1       | ENSG00000084636 | Silent        | c.432C>T                |
| 472    | COL22A1   | chr8       | ENSG00000169436 | Intron        | c.2356-64G>T            |
| 473    | COL22A1   | chr8       | ENSG00000169436 | Silent        | c.1107G>A               |
| 474    | COL22A1   | chr8       | ENSG00000169436 | Silent        | c.543C>G                |
| 475    | COL24A1   | chr1       | ENSG00000171502 | Missense      | c.2195G>C               |

| Number | Gene name | Chromosome | Gene_ID         | Mutation      | Nucleotide substitution |
|--------|-----------|------------|-----------------|---------------|-------------------------|
| 476    | COL27A1   | chr9       | ENSG00000196739 | Missense      | c.654C>G                |
| 477    | COL4A3    | chr2       | ENSG00000169031 | Missense      | c.1639G>A               |
| 478    | COL4A4    | chr2       | ENSG00000081052 | Missense      | c.929G>A                |
| 479    | COL5A2    | chr2       | ENSG00000204262 | 5'UTR         | c.-79C>G                |
| 480    | COL5A3    | chr19      | ENSG00000080573 | Intron        | c.3936+19C>G            |
| 481    | COL6A3    | chr2       | ENSG00000163359 | Missense      | c.8741C>G               |
| 482    | COL6A5    | chr3       | ENSG00000172752 | Missense      | c.100C>G                |
| 483    | COL6A5    | chr3       | ENSG00000172752 | Silent        | c.3525A>G               |
| 484    | COL6A6    | chr3       | ENSG00000206384 | Missense      | c.2481C>G               |
| 485    | COL6A6    | chr3       | ENSG00000206384 | Splice region | c.5092-3G>C             |
| 486    | COL6A6    | chr3       | ENSG00000206384 | Missense      | c.5471T>G               |
| 487    | COLGALT2  | chr1       | ENSG00000198756 | 3'UTR         | c.*610A>C               |
| 488    | COMMD2    | chr3       | ENSG00000114744 | 3'UTR         | c.*2013C>G              |
| 489    | COMP      | chr19      | ENSG00000105664 | 3'Flank       |                         |
| 490    | COPG1     | chr3       | ENSG00000181789 | Intron        | c.2257-652G>C           |
| 491    | COPZ2     | chr17      | ENSG00000005243 | Silent        | c.162G>A                |
| 492    | COPZ2     | chr17      | ENSG00000005243 | Missense      | c.7G>A                  |
| 493    | COX6A2    | chr16      | ENSG00000156885 | 3'UTR         | c.*42G>A                |
| 494    | COX7A2L   | chr2       | ENSG00000115944 | Intron        | c.204+335G>C            |
| 495    | CPS1      | chr2       | ENSG00000021826 | Missense      | c.2593G>A               |
| 496    | CR1       | chr1       | ENSG00000203710 | Intron        | c.3952+94C>G            |
| 497    | CRB1      | chr1       | ENSG00000134376 | 3'UTR         | c.*56C>G                |
| 498    | CREBRF    | chr5       | ENSG00000164463 | Missense      | c.1322T>G               |
| 499    | CREG1     | chr1       | ENSG00000143162 | Missense      | c.183C>A                |
| 500    | CRHR2     | chr7       | ENSG00000106113 | 3'UTR         | c.*378G>C               |
| 501    | CRLF3     | chr17      | ENSG00000176390 | Missense      | c.214G>A                |
| 502    | CRNKL1    | chr20      | ENSG00000101343 | Intron        | c.1419+42G>A            |
| 503    | CRNKL1    | chr20      | ENSG00000101343 | Silent        | c.1392G>C               |
| 504    | CROCC     | chr1       | ENSG00000058453 | Missense      | c.4984G>A               |
| 505    | CROCCP2   | chr1       | ENSG00000215908 | 5'Flank       |                         |
| 506    | CROCCP5   | chr1       | ENSG00000186543 | 5'Flank       |                         |
| 507    | CRYBG3    | chr3       | ENSG00000080200 | Missense      | c.2350G>C               |
| 508    | CRYBG3    | chr3       | ENSG00000080200 | Nonsense      | c.2363C>G               |
| 509    | CRYBG3    | chr3       | ENSG00000080200 | Missense      | c.6562G>C               |
| 510    | CSAD      | chr12      | ENSG00000139631 | Silent        | c.600C>G                |
| 511    | CSMD3     | chr8       | ENSG00000164796 | Missense      | c.10011G>C              |
| 512    | CSN1S1    | chr4       | ENSG00000126545 | Intron        | c.276+89C>T             |
| 513    | CSTF3     | chr11      | ENSG00000176102 | Missense      | c.1205G>A               |
| 514    | CTBP2     | chr10      | ENSG00000175029 | Silent        | c.294G>A                |
| 515    | CTDSP2    | chr12      | ENSG00000175215 | 3'UTR         | c.*3284C>G              |
| 516    | CTDSPL2   | chr15      | ENSG00000137770 | 3'UTR         | c.*2975C>G              |
| 517    | CTNNA1    | chr5       | ENSG00000044115 | Silent        | c.52C>T                 |
| 518    | CTNS      | chr17      | ENSG00000040531 | 5'Flank       |                         |
| 519    | CTNS      | chr17      | ENSG00000040531 | Intron        | c.62-86C>T              |
| 520    | CTNS      | chr17      | ENSG00000040531 | Missense      | c.343C>G                |
| 521    | CTNS      | chr17      | ENSG00000040531 | 3'UTR         | c.*18C>G                |
| 522    | CTPS1     | chr1       | ENSG00000171793 | Intron        | c.1296+119G>A           |
| 523    | CTSH      | chr15      | ENSG00000103811 | Intron        | c.124-336G>A            |
| 524    | CTTN      | chr11      | ENSG00000085733 | Intron        | c.790+12C>T             |
| 525    | CTTNBP2NL | chr1       | ENSG00000143079 | 3'UTR         | c.*1178G>A              |
| 526    | CTXN2     | chr15      | ENSG00000233932 | 3'UTR         | c.*562G>A               |
| 527    | CUX2      | chr12      | ENSG00000111249 | 5'Flank       |                         |
| 528    | CXCR5     | chr11      | ENSG00000160683 | 3'UTR         | c.*78G>C                |

| Number | Gene name | Chromosome | Gene_ID         | Mutation      | Nucleotide substitution |
|--------|-----------|------------|-----------------|---------------|-------------------------|
| 529    | CXorf38   | chrX       | ENSG00000185753 | Missense      | c.455G>A                |
| 530    | CXXC4     | chr4       | ENSG00000168772 | 3'Flank       |                         |
| 531    | CYBB      | chrX       | ENSG00000165168 | Missense      | c.1486G>A               |
| 532    | CYBRD1    | chr2       | ENSG00000071967 | 3'UTR         | c.*1193G>C              |
| 533    | CYP1A2    | chr15      | ENSG00000140505 | Missense      | c.100C>T                |
| 534    | CYP1A2    | chr15      | ENSG00000140505 | Silent        | c.432C>G                |
| 535    | CYP1A2    | chr15      | ENSG00000140505 | Missense      | c.481C>A                |
| 536    | CYP1A2    | chr15      | ENSG00000140505 | Missense      | c.817C>G                |
| 537    | CYP1A2    | chr15      | ENSG00000140505 | Intron        | c.1043-13C>A            |
| 538    | CYP2A7    | chr19      | ENSG00000198077 | Silent        | c.663C>T                |
| 539    | CYP2C18   | chr10      | ENSG00000108242 | Missense      | c.1135T>C               |
| 540    | CYP2C18   | chr10      | ENSG00000108242 | Nonsense      | c.1137C>G               |
| 541    | CYP2W1    | chr7       | ENSG00000073067 | Missense      | c.613G>A                |
| 542    | CYP4V2    | chr4       | ENSG00000145476 | Intron        | c.214+258C>G            |
| 543    | CYP4V2    | chr4       | ENSG00000145476 | Missense      | c.1445C>G               |
| 544    | CYTH1     | chr17      | ENSG00000108669 | 3'UTR         | c.*742G>A               |
| 545    | CYTH4     | chr22      | ENSG00000100055 | Missense      | c.28G>A                 |
| 546    | CYTIP     | chr2       | ENSG00000115165 | 3'UTR         | c.*606G>C               |
| 547    | DAAM2     | chr6       | ENSG00000146122 | 3'UTR         | c.*471G>T               |
| 548    | DACH1     | chr13      | ENSG00000276644 | 3'UTR         | c.*2166C>T              |
| 549    | DALRD3    | chr3       | ENSG00000178149 | Missense      | c.338C>T                |
| 550    | DAP3      | chr1       | ENSG00000132676 | Silent        | c.564G>A                |
| 551    | DAPK1     | chr9       | ENSG00000196730 | Intron        | c.553+9C>G              |
| 552    | DARS2     | chr1       | ENSG00000117593 | Missense      | c.1205G>C               |
| 553    | DCAF6     | chr1       | ENSG00000143164 | Intron        | c.688+36C>A             |
| 554    | DCBLD1    | chr6       | ENSG00000164465 | Silent        | c.1596C>T               |
| 555    | DCBLD2    | chr3       | ENSG00000057019 | 5'UTR         | c.-95G>A                |
| 556    | DCD       | chr12      | ENSG00000161634 | Intron        | c.98-402G>A             |
| 557    | DCHS1     | chr11      | ENSG00000166341 | Silent        | c.915C>T                |
| 558    | DCLK2     | chr4       | ENSG00000170390 | Silent        | c.618G>A                |
| 559    | DCLRE1C   | chr10      | ENSG00000152457 | Missense      | c.1603G>C               |
| 560    | DCUN1D2   | chr13      | ENSG00000150401 | Silent        | c.75G>C                 |
| 561    | DBI       | chr11      | ENSG00000167986 | Splice region | c.666C>G                |
| 562    | DDHD1     | chr14      | ENSG00000100523 | Silent        | c.252C>T                |
| 563    | DDI2      | chr1       | ENSG00000197312 | Missense      | c.198G>C                |
| 564    | DDIT3     | chr12      | ENSG00000175197 | Nonsense      | c.4G>T                  |
| 565    | DDIT4L    | chr4       | ENSG00000145358 | 3'UTR         | c.*1193A>C              |
| 566    | DDX11     | chr12      | ENSG00000013573 | Missense      | c.26C>G                 |
| 567    | DDX21     | chr10      | ENSG00000165732 | Missense      | c.1051G>A               |
| 568    | DDX41     | chr5       | ENSG00000183258 | Missense      | c.518G>A                |
| 569    | DDX41     | chr5       | ENSG00000183258 | 5'Flank       |                         |
| 570    | DDX53     | chrX       | ENSG00000184735 | Missense      | c.83G>C                 |
| 571    | DDX56     | chr7       | ENSG00000136271 | 3'UTR         | c.*526C>T               |
| 572    | DECR1     | chr8       | ENSG00000104325 | Intron        | c.885+18C>G             |
| 573    | DEFB115   | chr20      | ENSG00000215547 | Nonsense      | c.151G>T                |
| 574    | DELE1     | chr5       | ENSG00000081791 | 3'UTR         | c.*3264C>T              |
| 575    | DENND1A   | chr9       | ENSG00000119522 | 3'UTR         | c.*375G>A               |
| 576    | DENND1B   | chr1       | ENSG00000213047 | 3'UTR         | c.*3791C>G              |
| 577    | DENND5A   | chr11      | ENSG00000184014 | Missense      | c.2613C>G               |
| 578    | DENND5A   | chr11      | ENSG00000184014 | Intron        | c.1907-201G>A           |
| 579    | DEPTOR    | chr8       | ENSG00000155792 | 3'UTR         | c.*544G>T               |
| 580    | DGAT2L6   | chrX       | ENSG00000184210 | Silent        | c.501G>A                |
| 581    | DGKH      | chr13      | ENSG00000102780 | 3'UTR         | c.*499G>C               |

| Number | Gene name | Chromosome | Gene_ID         | Mutation | Nucleotide substitution |
|--------|-----------|------------|-----------------|----------|-------------------------|
| 582    | DGKI      | chr7       | ENSG00000157680 | Missense | c.910C>G                |
| 583    | DGKQ      | chr4       | ENSG00000145214 | Missense | c.860G>C                |
| 584    | DGLUCY    | chr14      | ENSG00000133943 | 3'UTR    | c.*272C>T               |
| 585    | DGLUCY    | chr14      | ENSG00000133943 | 3'UTR    | c.*447C>T               |
| 586    | DHRS4     | chr14      | ENSG00000157326 | Missense | c.463G>C                |
| 587    | DIAPH1    | chr5       | ENSG00000131504 | Missense | c.83C>T                 |
| 588    | DICER1    | chr14      | ENSG00000100697 | 3'UTR    | c.*424G>C               |
| 589    | DIDO1     | chr20      | ENSG00000101191 | Missense | c.1155C>G               |
| 590    | DIP2B     | chr12      | ENSG00000066084 | 3'UTR    | c.*2933C>G              |
| 591    | DIP2B     | chr12      | ENSG00000066084 | 3'UTR    | c.*3037C>T              |
| 592    | DIPK2A    | chr3       | ENSG00000181744 | 3'UTR    | c.*1458C>G              |
| 593    | DIRAS3    | chr1       | ENSG00000162595 | Silent   | c.390C>T                |
| 594    | DIRAS3    | chr1       | ENSG00000162595 | Missense | c.58C>A                 |
| 595    | DIS3L2    | chr2       | ENSG00000144535 | Intron   | c.1581+36628G>T         |
| 596    | DLG1      | chr3       | ENSG00000075711 | 3'UTR    | c.*360G>A               |
| 597    | DLGAP1    | chr18      | ENSG00000170579 | Silent   | c.1533G>C               |
| 598    | DLL3      | chr19      | ENSG00000090932 | Intron   | c.352-22C>G             |
| 599    | DLX5      | chr7       | ENSG00000105880 | Silent   | c.381G>A                |
| 600    | DMD       | chrX       | ENSG00000198947 | Intron   | c.4674+42C>A            |
| 601    | DMKN      | chr19      | ENSG00000161249 | Intron   | c.1192-31C>G            |
| 602    | DMKN      | chr19      | ENSG00000161249 | Silent   | c.6C>T                  |
| 603    | DMTF1     | chr7       | ENSG00000135164 | Intron   | c.1049+12G>A            |
| 604    | DMTN      | chr8       | ENSG00000158856 | 3'UTR    | c.*708G>A               |
| 605    | DMXL1     | chr5       | ENSG00000172869 | Missense | c.1219G>C               |
| 606    | DMXL1     | chr5       | ENSG00000172869 | Intron   | c.2377-11A>T            |
| 607    | DMXL1     | chr5       | ENSG00000172869 | Missense | c.7706G>T               |
| 608    | DNAAF1    | chr16      | ENSG00000154099 | Missense | c.1051G>T               |
| 609    | DNAH11    | chr7       | ENSG00000105877 | Silent   | c.1485C>G               |
| 610    | DNAH17    | chr17      | ENSG00000187775 | Missense | c.1474G>A               |
| 611    | DNAH5     | chr5       | ENSG00000039139 | Silent   | c.12165C>T              |
| 612    | DNAH5     | chr5       | ENSG00000039139 | Intron   | c.9373+49C>G            |
| 613    | DNAH6     | chr2       | ENSG00000115423 | Intron   | c.1602+69C>G            |
| 614    | DNAH7     | chr2       | ENSG00000118997 | Intron   | c.743+53T>A             |
| 615    | DNAH8     | chr6       | ENSG00000124721 | Silent   | c.5256T>A               |
| 616    | DNAH8     | chr6       | ENSG00000124721 | Silent   | c.7578C>T               |
| 617    | DNAJB14   | chr4       | ENSG00000164031 | 3'UTR    | c.*3091T>G              |
| 618    | DNAJB6    | chr7       | ENSG00000105993 | Silent   | c.828C>G                |
| 619    | DNAJC1    | chr10      | ENSG00000136770 | Intron   | c.537+182C>G            |
| 620    | DNAJC10   | chr2       | ENSG00000077232 | Missense | c.2102G>C               |
| 621    | DNAJC2    | chr7       | ENSG00000105821 | 3'UTR    | c.*1924G>A              |
| 622    | DNAJC30   | chr7       | ENSG00000176410 | 3'UTR    | c.*107G>A               |
| 623    | DNAJC30   | chr7       | ENSG00000176410 | Missense | c.265G>A                |
| 624    | DNLZ      | chr9       | ENSG00000213221 | 3'UTR    | c.*1995C>G              |
| 625    | DNM1      | chr9       | ENSG00000106976 | Intron   | c.1422+111C>G           |
| 626    | DNM3      | chr1       | ENSG00000197959 | Intron   | c.849+16C>T             |
| 627    | DNM3      | chr1       | ENSG00000197959 | Intron   | c.1546-14C>G            |
| 628    | DNM3      | chr1       | ENSG00000197959 | Silent   | c.1833G>A               |
| 629    | DNMT3B    | chr20      | ENSG00000088305 | 3'UTR    | c.*375C>G               |
| 630    | DOC2A     | chr16      | ENSG00000149927 | Missense | c.1034T>C               |
| 631    | DOCK4     | chr7       | ENSG00000128512 | Missense | c.111G>C                |
| 632    | DOCK6     | chr19      | ENSG00000130158 | Missense | c.5268C>G               |
| 633    | DOP1A     | chr6       | ENSG00000083097 | Missense | c.3686C>T               |
| 634    | DPF1      | chr19      | ENSG00000011332 | 3'UTR    | c.*869T>G               |

| Number | Gene name | Chromosome | Gene_ID         | Mutation | Nucleotide substitution |
|--------|-----------|------------|-----------------|----------|-------------------------|
| 635    | DPP3      | chr11      | ENSG00000254986 | 5'UTR    | c.-49G>T                |
| 636    | DPP4      | chr2       | ENSG00000197635 | 5'Flank  |                         |
| 637    | DPP8      | chr15      | ENSG00000074603 | 3'UTR    | c.*3083G>C              |
| 638    | DPP8      | chr15      | ENSG00000074603 | 3'UTR    | c.*1608C>G              |
| 639    | DPP8      | chr15      | ENSG00000074603 | Intron   | c.2271+42G>C            |
| 640    | DPY19L1   | chr7       | ENSG00000173852 | 3'UTR    | c.*1602C>T              |
| 641    | DPY19L1   | chr7       | ENSG00000173852 | Missense | c.62C>T                 |
| 642    | DPY19L4   | chr8       | ENSG00000156162 | 3'UTR    | c.*2928G>C              |
| 643    | DPYD      | chr1       | ENSG00000188641 | Intron   | c.484-16dup             |
| 644    | DPYSL4    | chr10      | ENSG00000151640 | 3'UTR    | c.*688G>A               |
| 645    | DRGX      | chr10      | ENSG00000165606 | 3'UTR    | c.*947C>T               |
| 646    | DROSHA    | chr5       | ENSG00000113360 | Intron   | c.1669-42C>G            |
| 647    | DTD1      | chr20      | ENSG00000125821 | Intron   | c.134+18C>T             |
| 648    | DTL       | chr1       | ENSG00000143476 | Silent   | c.1560G>A               |
| 649    | DUSP22    | chr6       | ENSG00000112679 | 3'UTR    | c.*623G>A               |
| 650    | DYNLRB1   | chr20      | ENSG00000125971 | 5'UTR    | c.-173C>G               |
| 651    | DYRK2     | chr12      | ENSG00000127334 | 5'UTR    | c.-272G>A               |
| 652    | DYRK2     | chr12      | ENSG00000127334 | 3'UTR    | c.*6546G>A              |
| 653    | E2F3      | chr6       | ENSG00000112242 | 3'UTR    | c.*395C>A               |
| 654    | E2F3      | chr6       | ENSG00000112242 | 3'UTR    | c.*534G>A               |
| 655    | E2F8      | chr11      | ENSG00000129173 | Missense | c.2461G>A               |
| 656    | EAF2      | chr3       | ENSG00000145088 | Missense | c.31G>C                 |
| 657    | EBF1      | chr5       | ENSG00000164330 | Missense | c.277G>A                |
| 658    | ECE2      | chr3       | ENSG00000145194 | Missense | c.970C>G                |
| 659    | ECI2      | chr6       | ENSG00000198721 | Intron   | c.-31+436C>G            |
| 660    | ECPAS     | chr9       | ENSG00000136813 | Intron   | c.4644+45C>G            |
| 661    | ECPAS     | chr9       | ENSG00000136813 | Missense | c.819T>G                |
| 662    | ECT2L     | chr6       | ENSG00000203734 | 3'UTR    | c.*1217G>C              |
| 663    | EDDM3A    | chr14      | ENSG00000181562 | 3'UTR    | c.*340T>G               |
| 664    | EEF1A1    | chr6       | ENSG00000156508 | 3'UTR    | c.*1567C>G              |
| 665    | EFCAB6    | chr22      | ENSG00000186976 | Missense | c.3556G>C               |
| 666    | EFHC1     | chr6       | ENSG00000096093 | Missense | c.1029C>G               |
| 667    | EFNA5     | chr5       | ENSG00000184349 | 3'UTR    | c.*3118G>C              |
| 668    | EGFL6     | chrX       | ENSG00000198759 | Missense | c.242G>T                |
| 669    | EHBP1     | chr2       | ENSG00000115504 | Missense | c.3251A>G               |
| 670    | EIF1AX    | chrX       | ENSG00000173674 | 3'UTR    | c.*3225C>G              |
| 671    | EIF4A2    | chr3       | ENSG00000156976 | Intron   | c.1080-99G>A            |
| 672    | EIF4E2    | chr2       | ENSG00000135930 | 5'Flank  |                         |
| 673    | EIF4E3    | chr3       | ENSG00000163412 | 3'UTR    | c.*1810C>G              |
| 674    | EIF5A2    | chr3       | ENSG00000163577 | 3'UTR    | c.*4854T>G              |
| 675    | ELMO1     | chr7       | ENSG00000155849 | Intron   | c.1438-24394C>T         |
| 676    | ELMO3     | chr16      | ENSG00000102890 | Intron   | c.192+159C>T            |
| 677    | ELMO3     | chr16      | ENSG00000102890 | 3'Flank  |                         |
| 678    | ELOVL2    | chr6       | ENSG00000197977 | 3'UTR    | c.*2259C>A              |
| 679    | EMC1      | chr1       | ENSG00000127463 | Missense | c.1045G>C               |
| 680    | EML1      | chr14      | ENSG00000066629 | Intron   | c.67+16161G>A           |
| 681    | EML4      | chr2       | ENSG00000143924 | 3'UTR    | c.*1515C>T              |
| 682    | EML5      | chr14      | ENSG00000165521 | Missense | c.4889G>T               |
| 683    | EMSY      | chr11      | ENSG00000158636 | 3'UTR    | c.*412G>A               |
| 684    | ENPP3     | chr6       | ENSG00000154269 | Intron   | c.78+982G>C             |
| 685    | EP300     | chr22      | ENSG00000100393 | 5'Flank  |                         |
| 686    | EPGN      | chr4       | ENSG00000182585 | Intron   | c.408-27C>G             |
| 687    | EPHA10    | chr1       | ENSG00000183317 | 3'UTR    | c.*700G>A               |

| Number | Gene name | Chromosome | Gene_ID         | Mutation    | Nucleotide substitution |
|--------|-----------|------------|-----------------|-------------|-------------------------|
| 688    | EPHB3     | chr3       | ENSG00000182580 | 3'UTR       | c.*414G>A               |
| 689    | EPHX2     | chr8       | ENSG00000120915 | Missense    | c.1144G>C               |
| 690    | EPYC      | chr12      | ENSG00000083782 | Missense    | c.730C>T                |
| 691    | ERAP1     | chr5       | ENSG00000164307 | 3'UTR       | c.*1845G>A              |
| 692    | ERBB2     | chr17      | ENSG00000141736 | Intron      | c.73+87G>A              |
| 693    | ERBB2     | chr17      | ENSG00000141736 | 3'UTR       | c.*51C>T                |
| 694    | ERBB2     | chr17      | ENSG00000141736 | Missense    | c.3631C>G               |
| 695    | ERBB2     | chr17      | ENSG00000141736 | Silent      | c.3651C>T               |
| 696    | ERBB3     | chr12      | ENSG00000065361 | Intron      | c.1274+103C>G           |
| 697    | ERCC4     | chr16      | ENSG00000175595 | Splice site | c.585-1G>A              |
| 698    | ERCC6     | chr10      | ENSG00000225830 | Intron      | c.543+19C>T             |
| 699    | ERCC8     | chr5       | ENSG00000049167 | 5'Flank     |                         |
| 700    | ERG       | chr21      | ENSG00000157554 | 3'UTR       | c.*769G>A               |
| 701    | ERG       | chr21      | ENSG00000157554 | Missense    | c.853G>T                |
| 702    | ERG       | chr21      | ENSG00000157554 | Intron      | c.19-1172C>T            |
| 703    | ERICH4    | chr19      | ENSG00000204978 | Nonsense    | c.103C>T                |
| 704    | ERICH6    | chr3       | ENSG00000163645 | Intron      | c.1343+12C>G            |
| 705    | ERICH6    | chr3       | ENSG00000163645 | Missense    | c.1309C>G               |
| 706    | ERLEC1    | chr2       | ENSG00000068912 | 5'UTR       | c.-113G>A               |
| 707    | ERV3-1    | chr7       | ENSG00000213462 | 3'UTR       | c.*145G>C               |
| 708    | ESPN      | chr1       | ENSG00000187017 | Intron      | c.717+9G>C              |
| 709    | ESYT1     | chr12      | ENSG00000139641 | Intron      | c.2367+49G>A            |
| 710    | ESYT1     | chr12      | ENSG00000139641 | 3'UTR       | c.*477C>G               |
| 711    | ETFA      | chr15      | ENSG00000140374 | Intron      | c.518-13C>A             |
| 712    | ETV5      | chr3       | ENSG00000244405 | 3'UTR       | c.*1300 *1301delinsAT   |
| 713    | ETV5      | chr3       | ENSG00000244405 | Missense    | c.625G>A                |
| 714    | EVC       | chr4       | ENSG00000072840 | Intron      | c.1465-71G>C            |
| 715    | EVPL      | chr17      | ENSG00000167880 | Missense    | c.4355G>A               |
| 716    | EXOC7     | chr17      | ENSG00000182473 | Intron      | c.1207-44G>A            |
| 717    | EXT1      | chr8       | ENSG00000182197 | 3'UTR       | c.*1931C>G              |
| 718    | EXT1      | chr8       | ENSG00000182197 | 3'UTR       | c.*977C>G               |
| 719    | EYA3      | chr1       | ENSG00000158161 | 3'UTR       | c.*1049G>C              |
| 720    | EYS       | chr6       | ENSG00000188107 | Missense    | c.5221G>A               |
| 721    | EYS       | chr6       | ENSG00000188107 | Missense    | c.5155C>G               |
| 722    | EYS       | chr6       | ENSG00000188107 | 3'UTR       | c.*2177C>T              |
| 723    | F13B      | chr1       | ENSG00000143278 | Intron      | c.985+18G>C             |
| 724    | F13B      | chr1       | ENSG00000143278 | Silent      | c.888A>G                |
| 725    | F8        | chrX       | ENSG00000185010 | Missense    | c.627G>C                |
| 726    | FABP1     | chr2       | ENSG00000163586 | 3'UTR       | c.*510G>C               |
| 727    | FAIM2     | chr12      | ENSG00000135472 | 5'UTR       | c.-538C>T               |
| 728    | FAM102B   | chr1       | ENSG00000162636 | 3'UTR       | c.*37A>C                |
| 729    | FAM114A1  | chr4       | ENSG00000197712 | Intron      | c.437-28C>A             |
| 730    | FAM114A1  | chr4       | ENSG00000197712 | Missense    | c.547G>C                |
| 731    | FAM114A1  | chr4       | ENSG00000197712 | Intron      | c.550+59G>C             |
| 732    | FAM118A   | chr22      | ENSG00000100376 | Intron      | c.-9-129C>G             |
| 733    | FAM135B   | chr8       | ENSG00000147724 | Silent      | c.504C>G                |
| 734    | FAM13A    | chr4       | ENSG00000138640 | 3'UTR       | c.*2070C>T              |
| 735    | FAM13A    | chr4       | ENSG00000138640 | 3'UTR       | c.*463T>A               |
| 736    | FAM13B    | chr5       | ENSG00000031003 | Missense    | c.2134C>T               |
| 737    | FAM162A   | chr3       | ENSG00000114023 | Missense    | c.321C>A                |
| 738    | FAM170A   | chr5       | ENSG00000164334 | Intron      | c.70+21C>T              |
| 739    | FAM172BP  | chr3       | ENSG00000175841 | RNA         | n.92G>A                 |
| 740    | FAM182B   | chr20      | ENSG00000175170 | Intron      | n.646-18C>G             |

| Number | Gene name | Chromosome | Gene_ID         | Mutation        | Nucleotide substitution |
|--------|-----------|------------|-----------------|-----------------|-------------------------|
| 741    | FAM184A   | chr6       | ENSG00000111879 | 3'UTR           | c.*627A>G               |
| 742    | FAM205A   | chr9       | ENSG00000205108 | Missense        | c.2732G>C               |
| 743    | FAM214B   | chr9       | ENSG00000005238 | 3'UTR           | c.*732G>A               |
| 744    | FAM214B   | chr9       | ENSG00000005238 | Intron          | c.1288-19T>G            |
| 745    | FAM228B   | chr2       | ENSG00000219626 | Intron          | c.932+1052G>A           |
| 746    | FAM3A     | chrX       | ENSG00000071889 | 5'UTR           | c.-277C>T               |
| 747    | FAM3A     | chrX       | ENSG00000071889 | 5'UTR           | c.-325G>T               |
| 748    | FAM83A    | chr8       | ENSG00000147689 | Missense        | c.46G>A                 |
| 749    | FAM8A1    | chr6       | ENSG00000137414 | 5'UTR           | c.-66G>C                |
| 750    | FASN      | chr17      | ENSG00000169710 | Silent          | c.1362G>A               |
| 751    | FASTKD5   | chr20      | ENSG00000215251 | 5'UTR           | c.-158G>A               |
| 752    | FAT1      | chr4       | ENSG00000083857 | Silent          | c.9339C>T               |
| 753    | FBL       | chr19      | ENSG00000105202 | Intron          | c.549+12G>C             |
| 754    | FBLN1     | chr22      | ENSG00000077942 | Missense        | c.1723G>A               |
| 755    | FBLN1     | chr22      | ENSG00000077942 | 3'UTR           | c.*118C>A               |
| 756    | FBLN1     | chr22      | ENSG00000077942 | 3'UTR           | c.*122C>G               |
| 757    | FBN1      | chr15      | ENSG00000166147 | Missense        | c.3102G>A               |
| 758    | FBRS      | chr16      | ENSG00000156860 | Splice region   | c.316-7C>T              |
| 759    | FBRSL1    | chr12      | ENSG00000112787 | Silent          | c.2019C>T               |
| 760    | FBXL22    | chr15      | ENSG00000197361 | 3'UTR           | c.*8C>G                 |
| 761    | FBXO4     | chr5       | ENSG00000151876 | Missense        | c.904G>C                |
| 762    | FCAMR     | chr1       | ENSG00000162897 | 3'UTR           | c.*311C>T               |
| 763    | FCGR3B    | chr1       | ENSG00000162747 | Silent          | c.114T>C                |
| 764    | FCGR3B    | chr1       | ENSG00000162747 | Missense        | c.108C>G                |
| 765    | FCHO1     | chr19      | ENSG00000130475 | Splice region   | c.790+3G>A              |
| 766    | FCRL3     | chr1       | ENSG00000160856 | 3'UTR           | c.*2174C>G              |
| 767    | FCRL4     | chr1       | ENSG00000163518 | 3'UTR           | c.*227G>C               |
| 768    | FCRL5     | chr1       | ENSG00000143297 | Intron          | c.32-44T>A              |
| 769    | FCSK      | chr16      | ENSG00000157353 | Missense        | c.340G>C                |
| 770    | FCSK      | chr16      | ENSG00000157353 | Missense        | c.622G>C                |
| 771    | FER1L5    | chr2       | ENSG00000249715 | Silent          | c.3900G>A               |
| 772    | FER1L6    | chr8       | ENSG00000214814 | Missense        | c.446C>T                |
| 773    | FERMT1    | chr20      | ENSG00000101311 | 3'UTR           | c.*399G>C               |
| 774    | FERMT2    | chr14      | ENSG00000073712 | Intron          | c.157+1831G>C           |
| 775    | FES       | chr15      | ENSG00000182511 | Missense        | c.912G>C                |
| 776    | FGA       | chr4       | ENSG00000171560 | Missense        | c.1141G>A               |
| 777    | FGD1      | chrX       | ENSG00000102302 | Intron          | c.1636+49C>G            |
| 778    | FGD2      | chr6       | ENSG00000146192 | Missense        | c.1881G>C               |
| 779    | FGF3      | chr11      | ENSG00000186895 | Missense        | c.448G>A                |
| 780    | FGFR1     | chr8       | ENSG00000077782 | 3'UTR           | c.*2447G>T              |
| 781    | FGFR2     | chr10      | ENSG00000066468 | Intron          | c.673-495G>C            |
| 782    | FHAD1     | chr1       | ENSG00000142621 | Intron          | c.1827+6241G>C          |
| 783    | FIBCD1    | chr9       | ENSG00000130720 | Intron          | c.-402-860C>T           |
| 784    | FIG4      | chr6       | ENSG00000112367 | Intron          | c.1271+28G>C            |
| 785    | FIGNL1    | chr7       | ENSG00000132436 | Silent          | c.45G>A                 |
| 786    | FKBP14    | chr7       | ENSG00000106080 | Missense        | c.454G>A                |
| 787    | FKBP15    | chr9       | ENSG00000119321 | 3'UTR           | c.*260A>C               |
| 788    | FKBP15    | chr9       | ENSG00000119321 | Missense        | c.2642C>G               |
| 789    | FKBP5     | chr6       | ENSG00000096060 | 3'UTR           | c.*889C>G               |
| 790    | FKBP7     | chr2       | ENSG00000079150 | Intron          | c.374-3348G>A           |
| 791    | FKBP7     | chr2       | ENSG00000079150 | 5'UTR           | c.-66C>G                |
| 792    | FLG       | chr1       | ENSG00000143631 | Frame Shift Ins | c.477dup                |
| 793    | FLNA      | chrX       | ENSG00000196924 | Missense        | c.6166G>C               |

| Number | Gene name   | Chromosome | Gene_ID         | Mutation | Nucleotide substitution |
|--------|-------------|------------|-----------------|----------|-------------------------|
| 794    | FLNA        | chrX       | ENSG00000196924 | 5'UTR    | c.-95C>T                |
| 795    | FLOT2       | chr17      | ENSG00000132589 | Missense | c.1108G>C               |
| 796    | FMN1        | chr15      | ENSG00000248905 | Missense | c.1744G>A               |
| 797    | FMN1        | chr15      | ENSG00000248905 | Intron   | c.1554+41G>C            |
| 798    | FMNL2       | chr2       | ENSG00000157827 | Missense | c.530G>A                |
| 799    | FMNL2       | chr2       | ENSG00000157827 | Intron   | c.2845-46C>G            |
| 800    | FMNL3       | chr12      | ENSG00000161791 | 3'UTR    | c.*9C>T                 |
| 801    | FMO1        | chr1       | ENSG0000010932  | Missense | c.1497C>G               |
| 802    | FNDC1       | chr6       | ENSG00000164694 | Missense | c.1299C>G               |
| 803    | FNDC3B      | chr3       | ENSG00000075420 | 3'UTR    | c.*223G>T               |
| 804    | FNDC3B      | chr3       | ENSG00000075420 | 3'UTR    | c.*1430G>C              |
| 805    | FOLH1       | chr11      | ENSG00000086205 | Missense | c.96C>G                 |
| 806    | FOS         | chr14      | ENSG00000170345 | 5'UTR    | c.-398G>T               |
| 807    | FOXK2       | chr17      | ENSG00000141568 | 3'UTR    | c.*1358G>C              |
| 808    | FOXL1       | chr16      | ENSG00000176678 | Missense | c.1012C>G               |
| 809    | FOXL1       | chr16      | ENSG00000176678 | 3'UTR    | c.*1154C>G              |
| 810    | FOXP2       | chr7       | ENSG00000128573 | 3'UTR    | c.*516G>A               |
| 811    | FOXP4       | chr6       | ENSG00000137166 | Intron   | c.1150-52C>T            |
| 812    | FPGS        | chr9       | ENSG00000136877 | Intron   | c.430-41G>A             |
| 813    | FPGT-TNNI3K | chr1       | ENSG00000259030 | 3'UTR    | c.*2050C>T              |
| 814    | FRAT2       | chr10      | ENSG00000181274 | 3'UTR    | c.*1245G>A              |
| 815    | FREM2       | chr13      | ENSG00000150893 | Missense | c.6063G>C               |
| 816    | FRMD3       | chr9       | ENSG00000172159 | 3'UTR    | c.*1532C>G              |
| 817    | FRMD8P1     | chrX       | ENSG00000227942 | RNA      | n.1179C>A               |
| 818    | FRMPD4      | chrX       | ENSG00000169933 | 3'UTR    | c.*2841G>A              |
| 819    | FRY         | chr13      | ENSG00000073910 | Silent   | c.3342C>T               |
| 820    | FRY         | chr13      | ENSG00000073910 | Intron   | c.7414-118G>C           |
| 821    | FRYL        | chr4       | ENSG00000075539 | 3'UTR    | c.*1760G>C              |
| 822    | FRYL        | chr4       | ENSG00000075539 | Intron   | c.4266+16C>G            |
| 823    | FSD1L       | chr9       | ENSG00000106701 | Intron   | c.369-7240G>T           |
| 824    | FSIP2       | chr2       | ENSG00000188738 | Missense | c.10984C>G              |
| 825    | FSIP2       | chr2       | ENSG00000188738 | Missense | c.17044G>C              |
| 826    | FSTL1       | chr3       | ENSG00000163430 | 3'UTR    | c.*3742C>G              |
| 827    | FSTL1       | chr3       | ENSG00000163430 | 3'UTR    | c.*3183C>G              |
| 828    | FSTL1       | chr3       | ENSG00000163430 | 3'UTR    | c.*1954C>G              |
| 829    | FSTL1       | chr3       | ENSG00000163430 | 3'UTR    | c.*1288C>G              |
| 830    | FSTL1       | chr3       | ENSG00000163430 | 3'UTR    | c.*1219C>G              |
| 831    | FTCDNL1     | chr2       | ENSG00000226124 | Missense | c.398C>A                |
| 832    | FTO         | chr16      | ENSG00000140718 | 3'UTR    | c.*7652G>C              |
| 833    | FTSJ3       | chr17      | ENSG00000108592 | Intron   | c.68-42C>A              |
| 834    | FUT4        | chr11      | ENSG00000196371 | Missense | c.680C>T                |
| 835    | FUT8        | chr14      | ENSG00000033170 | Silent   | c.123C>T                |
| 836    | FXR1        | chr3       | ENSG00000114416 | 3'UTR    | c.*165del               |
| 837    | FYCO1       | chr3       | ENSG00000163820 | Missense | c.177G>C                |
| 838    | FZD7        | chr2       | ENSG00000155760 | Nonsense | c.626C>G                |
| 839    | G3BP1       | chr5       | ENSG00000145907 | Missense | c.372C>G                |
| 840    | GAA         | chr17      | ENSG00000171298 | Nonsense | c.118C>T                |
| 841    | GAB4        | chr22      | ENSG00000215568 | 3'UTR    | c.*545C>T               |
| 842    | GABRA2      | chr4       | ENSG00000151834 | 5'UTR    | c.-92G>A                |
| 843    | GABRA3      | chrX       | ENSG00000011677 | 3'UTR    | c.*360G>C               |
| 844    | GABRR2      | chr6       | ENSG00000111886 | Missense | c.961G>A                |
| 845    | GABRR2      | chr6       | ENSG00000111886 | Missense | c.789C>G                |
| 846    | GABRR2      | chr6       | ENSG00000111886 | Intron   | c.737-26C>T             |



| Number | Gene name | Chromosome | Gene_ID         | Mutation | Nucleotide substitution |
|--------|-----------|------------|-----------------|----------|-------------------------|
| 847    | GAD1      | chr2       | ENSG00000128683 | Missense | c.564C>A                |
| 848    | GAD2      | chr10      | ENSG00000136750 | Intron   | c.286+17G>C             |
| 849    | GALK2     | chr15      | ENSG00000156958 | Intron   | c.20+13966C>G           |
| 850    | GALM      | chr2       | ENSG00000143891 | Intron   | c.553-30G>T             |
| 851    | GALNT16   | chr14      | ENSG00000100626 | Missense | c.931G>T                |
| 852    | GALNTL6   | chr4       | ENSG00000174473 | Intron   | c.924-40C>T             |
| 853    | GALR1     | chr18      | ENSG00000166573 | Missense | c.237C>G                |
| 854    | GALR2     | chr17      | ENSG00000182687 | 3'Flank  |                         |
| 855    | GAS2L3    | chr12      | ENSG00000139354 | Intron   | c.446-72C>T             |
| 856    | GASK1B    | chr4       | ENSG00000164125 | 3'UTR    | c.*2918G>C              |
| 857    | GATA1     | chrX       | ENSG00000102145 | Intron   | c.599-26C>A             |
| 858    | GATA3     | chr10      | ENSG00000107485 | Intron   | c.-369-4007C>G          |
| 859    | GATM      | chr15      | ENSG00000171766 | Missense | c.137C>T                |
| 860    | GBX2      | chr2       | ENSG00000168505 | Silent   | c.120C>T                |
| 861    | GBX2      | chr2       | ENSG00000168505 | Silent   | c.84C>T                 |
| 862    | GBX2      | chr2       | ENSG00000168505 | 5'UTR    | c.-213C>G               |
| 863    | GCKR      | chr2       | ENSG00000084734 | Silent   | c.180C>A                |
| 864    | GCKR      | chr2       | ENSG00000084734 | Silent   | c.348C>T                |
| 865    | GCNT2     | chr6       | ENSG00000111846 | Missense | c.994G>C                |
| 866    | GCOM1     | chr15      | ENSG00000137878 | Intron   | c.1305-7845C>G          |
| 867    | GDA       | chr9       | ENSG00000119125 | 3'UTR    | c.*2375C>A              |
| 868    | GDF5      | chr20      | ENSG00000125965 | 3'UTR    | c.*269G>T               |
| 869    | GDI1      | chrX       | ENSG00000203879 | Intron   | c.719+34G>A             |
| 870    | GDPD1     | chr17      | ENSG00000153982 | 3'UTR    | c.*31G>C                |
| 871    | GET1      | chr21      | ENSG00000182093 | Intron   | c.-1+2449C>A            |
| 872    | GET3      | chr19      | ENSG00000198356 | Intron   | c.717+41G>C             |
| 873    | GET4      | chr7       | ENSG00000239857 | 5'Flank  |                         |
| 874    | GFM1      | chr3       | ENSG00000168827 | Intron   | c.1658+581C>G           |
| 875    | GFRA1     | chr10      | ENSG00000151892 | Missense | c.907G>C                |
| 876    | GFRA3     | chr5       | ENSG00000146013 | Missense | c.910T>G                |
| 877    | GGA3      | chr17      | ENSG00000125447 | Missense | c.1766C>G               |
| 878    | GGT1      | chr22      | ENSG00000286070 | Intron   | c.296-55C>T             |
| 879    | GIGYF2    | chr2       | ENSG00000204120 | Intron   | c.492-35G>C             |
| 880    | GIMAP2    | chr7       | ENSG00000106560 | Silent   | c.453C>T                |
| 881    | GIMAP5    | chr7       | ENSG00000196329 | RNA      | n.428C>A                |
| 882    | GIMAP6    | chr7       | ENSG00000133561 | 3'UTR    | c.*2174C>G              |
| 883    | GIMAP7    | chr7       | ENSG00000179144 | Missense | c.43G>C                 |
| 884    | GIMAP8    | chr7       | ENSG00000171115 | Missense | c.1615G>A               |
| 885    | GINS1     | chr20      | ENSG00000101003 | 3'UTR    | c.*1501C>T              |
| 886    | GINS3     | chr16      | ENSG00000181938 | Missense | c.516G>C                |
| 887    | GIPC3     | chr19      | ENSG00000179855 | Intron   | c.411+59C>G             |
| 888    | GJB1      | chrX       | ENSG00000169562 | Missense | c.389C>T                |
| 889    | GK2       | chr4       | ENSG00000196475 | Missense | c.229G>A                |
| 890    | GLI2      | chr2       | ENSG00000074047 | Missense | c.4213G>T               |
| 891    | GLIPR1L2  | chr12      | ENSG00000180481 | Missense | c.604G>C                |
| 892    | GLIPR2    | chr9       | ENSG00000122694 | 3'UTR    | c.*648C>G               |
| 893    | GLIPR2    | chr9       | ENSG00000122694 | 3'UTR    | c.*932C>G               |
| 894    | GLO1      | chr6       | ENSG00000124767 | 3'UTR    | c.*673G>C               |
| 895    | GLP2R     | chr17      | ENSG00000065325 | Intron   | c.382+88C>A             |
| 896    | GLRA3     | chr4       | ENSG00000145451 | 3'UTR    | c.*3609G>C              |
| 897    | GLRA3     | chr4       | ENSG00000145451 | 5'UTR    | c.-375C>G               |
| 898    | GLRX3     | chr10      | ENSG00000108010 | Missense | c.281C>T                |
| 899    | GLUD1     | chr10      | ENSG00000148672 | Intron   | c.742-34G>A             |

| Number | Gene name | Chromosome | Gene_ID         | Mutation      | Nucleotide substitution |
|--------|-----------|------------|-----------------|---------------|-------------------------|
| 900    | GMCL1     | chr2       | ENSG00000087338 | 5'UTR         | c.-112G>C               |
| 901    | GMEB1     | chr1       | ENSG00000162419 | Missense      | c.572G>A                |
| 902    | GMFB      | chr14      | ENSG00000197045 | Splice site   | c.4-1G>C                |
| 903    | GMNC      | chr3       | ENSG00000205835 | 3'UTR         | c.*2026A>G              |
| 904    | GMPS      | chr3       | ENSG00000163655 | Splice region | c.123C>T                |
| 905    | GMPS      | chr3       | ENSG00000163655 | 3'UTR         | c.*1882C>T              |
| 906    | GMPS      | chr3       | ENSG00000163655 | 3'UTR         | c.*2269C>A              |
| 907    | GNB2      | chr7       | ENSG00000172354 | Missense      | c.482C>G                |
| 908    | GNE       | chr9       | ENSG00000159921 | 3'UTR         | c.*1994C>T              |
| 909    | GNG7      | chr19      | ENSG00000176533 | Silent        | c.186G>A                |
| 910    | GNGT2     | chr17      | ENSG00000167083 | 3'UTR         | c.*356C>G               |
| 911    | GNPDA2    | chr4       | ENSG00000163281 | Intron        | c.226+24A>C             |
| 912    | GOLGA1    | chr9       | ENSG00000136935 | Silent        | c.963G>A                |
| 913    | GOLGA6L2  | chr15      | ENSG00000174450 | Missense      | c.654G>C                |
| 914    | GOLGB1    | chr3       | ENSG00000173230 | 3'UTR         | c.*387G>C               |
| 915    | GOLT1A    | chr1       | ENSG00000174567 | Silent        | c.156G>C                |
| 916    | GP5       | chr3       | ENSG00000178732 | 3'UTR         | c.*775C>G               |
| 917    | GP5       | chr3       | ENSG00000178732 | Missense      | c.176G>C                |
| 918    | GPA33     | chr1       | ENSG00000143167 | Missense      | c.695C>T                |
| 919    | GPAT4     | chr8       | ENSG00000158669 | 3'UTR         | c.*2615G>A              |
| 920    | GPD1      | chr12      | ENSG00000167588 | Intron        | c.612+172C>G            |
| 921    | GPD2      | chr2       | ENSG00000115159 | Intron        | c.2181-60C>G            |
| 922    | GPHN      | chr14      | ENSG00000171723 | Missense      | c.171G>C                |
| 923    | GPNMB     | chr7       | ENSG00000136235 | 5'Flank       |                         |
| 924    | GPR160    | chr3       | ENSG00000173890 | Silent        | c.702G>C                |
| 925    | GPR162    | chr12      | ENSG00000250510 | Missense      | c.779C>G                |
| 926    | GPR173    | chrX       | ENSG00000184194 | 3'UTR         | c.*1618G>C              |
| 927    | GPR61     | chr1       | ENSG00000156097 | 3'UTR         | c.*2048G>A              |
| 928    | GPRC5C    | chr17      | ENSG00000170412 | Silent        | c.69G>A                 |
| 929    | GPRIN2    | chr10      | ENSG00000204175 | Missense      | c.927G>T                |
| 930    | GRAMD4    | chr22      | ENSG00000075240 | 3'UTR         | c.*1989C>T              |
| 931    | GRHL1     | chr2       | ENSG00000134317 | Intron        | c.20+1150C>G            |
| 932    | GRIA1     | chr5       | ENSG00000155511 | 3'UTR         | c.*784G>C               |
| 933    | GRIK3     | chr1       | ENSG00000163873 | 3'UTR         | c.*5696G>C              |
| 934    | GRIK3     | chr1       | ENSG00000163873 | 3'UTR         | c.*5562G>A              |
| 935    | GRIK3     | chr1       | ENSG00000163873 | 3'UTR         | c.*4511G>A              |
| 936    | GRIN2B    | chr12      | ENSG00000273079 | Silent        | c.1461G>A               |
| 937    | GRK4      | chr4       | ENSG00000125388 | 3'UTR         | c.*1309G>C              |
| 938    | GRM5      | chr11      | ENSG00000168959 | Silent        | c.2460G>A               |
| 939    | GSDMB     | chr17      | ENSG00000073605 | Missense      | c.348G>C                |
| 940    | GSE1      | chr16      | ENSG00000131149 | Silent        | c.2523G>A               |
| 941    | GSK3B     | chr3       | ENSG00000082701 | 3'UTR         | c.*843G>C               |
| 942    | GSS       | chr20      | ENSG00000100983 | 3'UTR         | c.*676G>A               |
| 943    | GTDC1     | chr2       | ENSG00000121964 | Missense      | c.667G>A                |
| 944    | GTF2A1    | chr14      | ENSG00000165417 | 3'UTR         | c.*2572C>G              |
| 945    | GTF2F1    | chr19      | ENSG00000125651 | 3'UTR         | c.*581C>A               |
| 946    | GTPBP8    | chr3       | ENSG00000163607 | Silent        | c.69G>C                 |
| 947    | GTPBP8    | chr3       | ENSG00000163607 | Missense      | c.103G>A                |
| 948    | GUCY1A1   | chr4       | ENSG00000164116 | Missense      | c.1694C>A               |
| 949    | GYS2      | chr12      | ENSG00000111713 | Intron        | c.1169+41G>A            |
| 950    | H1FX      | chr3       | ENSG00000184897 | 3'Flank       |                         |
| 951    | H1FX      | chr3       | ENSG00000184897 | 3'UTR         | c.*289C>T               |
| 952    | HAEO      | chr2       | ENSG00000162882 | Silent        | c.531C>T                |

| Number | Gene name | Chromosome | Gene_ID         | Mutation      | Nucleotide substitution |
|--------|-----------|------------|-----------------|---------------|-------------------------|
| 953    | HAAO      | chr2       | ENSG00000162882 | Intron        | c.80+36C>T              |
| 954    | HAND2-AS1 | chr4       | ENSG00000237125 | RNA           | n.641C>T                |
| 955    | HAP1      | chr17      | ENSG00000173805 | 3'UTR         | c.*1853C>G              |
| 956    | HAPLN2    | chr1       | ENSG00000132702 | Silent        | c.483C>T                |
| 957    | HBA1      | chr16      | ENSG00000206172 | 3'UTR         | c.*41C>A                |
| 958    | HBD       | chr11      | ENSG00000223609 | Missense      | c.152C>G                |
| 959    | HBM       | chr16      | ENSG00000206177 | Intron        | c.298-21C>G             |
| 960    | HCFC2     | chr12      | ENSG00000111727 | Missense      | c.370C>G                |
| 961    | HDAC11    | chr3       | ENSG00000163517 | Intron        | c.490-214G>C            |
| 962    | HDAC5     | chr17      | ENSG00000108840 | Missense      | c.2707C>G               |
| 963    | HDC       | chr15      | ENSG00000140287 | 5'Flank       |                         |
| 964    | HDGF      | chr1       | ENSG00000143321 | Silent        | c.66C>G                 |
| 965    | HEATR3    | chr16      | ENSG00000155393 | Intron        | c.139-26C>G             |
| 966    | HEATR5B   | chr2       | ENSG00000008869 | Silent        | c.1302C>T               |
| 967    | HECTD1    | chr14      | ENSG00000092148 | Missense      | c.5689G>C               |
| 968    | HECTD4    | chr12      | ENSG00000173064 | Splice region | c.7230+3G>C             |
| 969    | HEG1      | chr3       | ENSG00000173706 | Missense      | c.2714G>T               |
| 970    | HELQ      | chr4       | ENSG00000163312 | Intron        | c.1662+62T>G            |
| 971    | HELQ      | chr4       | ENSG00000163312 | Missense      | c.241G>C                |
| 972    | HELQ      | chr4       | ENSG00000163312 | 5'UTR         | c.-130G>A               |
| 973    | HELZ      | chr17      | ENSG00000198265 | Silent        | c.5226C>A               |
| 974    | HERC1     | chr15      | ENSG00000103657 | Missense      | c.14380C>G              |
| 975    | HERC1     | chr15      | ENSG00000103657 | Missense      | c.14271C>G              |
| 976    | HERC3     | chr4       | ENSG00000138641 | Intron        | c.778-53G>C             |
| 977    | HFM1      | chr1       | ENSG00000162669 | Missense      | c.3867G>C               |
| 978    | HGSNAT    | chr8       | ENSG00000165102 | Missense      | c.1436C>G               |
| 979    | HHEX      | chr10      | ENSG00000152804 | Silent        | c.666C>A                |
| 980    | HIC2      | chr22      | ENSG00000169635 | 3'UTR         | c.*2619G>C              |
| 981    | HID1      | chr17      | ENSG00000167861 | 3'UTR         | c.*219C>T               |
| 982    | HIP1      | chr7       | ENSG00000127946 | Missense      | c.982G>C                |
| 983    | HIP1R     | chr12      | ENSG00000130787 | Nonsense      | c.445C>T                |
| 984    | HIP1R     | chr12      | ENSG00000130787 | 3'UTR         | c.*1074C>G              |
| 985    | HIPK2     | chr7       | ENSG00000064393 | 3'UTR         | c.*9581G>C              |
| 986    | HIPK2     | chr7       | ENSG00000064393 | 3'UTR         | c.*7421G>A              |
| 987    | HIPK3     | chr11      | ENSG00000110422 | Missense      | c.1568C>G               |
| 988    | HIST1H1C  | chr6       | ENSG00000187837 | 5'Flank       |                         |
| 989    | HIST1H2AG | chr6       | ENSG00000196787 | 3'UTR         | c.*1468G>C              |
| 990    | HIST1H2AH | chr6       | ENSG00000274997 | Missense      | c.89G>C                 |
| 991    | HIST1H3C  | chr6       | ENSG00000287080 | Missense      | c.292G>A                |
| 992    | HIST1H3J  | chr6       | ENSG00000197153 | 5'Flank       |                         |
| 993    | HIVEP2    | chr6       | ENSG00000010818 | Missense      | c.7309G>T               |
| 994    | HK1       | chr10      | ENSG00000156515 | Missense      | c.533G>T                |
| 995    | HKDC1     | chr10      | ENSG00000156510 | Missense      | c.2014G>A               |
| 996    | HMCN1     | chr1       | ENSG00000143341 | Silent        | c.7902C>T               |
| 997    | HMGA2     | chr12      | ENSG00000149948 | 3'UTR         | c.*3161C>T              |
| 998    | HMGCLL1   | chr6       | ENSG00000146151 | 3'UTR         | c.*1648T>C              |
| 999    | HMGN2     | chr1       | ENSG00000198830 | Intron        | c.91-65G>C              |
| 1000   | HMX3      | chr10      | ENSG00000188620 | Silent        | c.522G>A                |
| 1001   | HNF4G     | chr8       | ENSG00000164749 | 3'Flank       |                         |
| 1002   | HNRNPLL   | chr2       | ENSG00000143889 | Intron        | c.714+15C>T             |
| 1003   | HNRNPUL2  | chr11      | ENSG00000214753 | 5'UTR         | c.-158G>A               |
| 1004   | HOXD9     | chr2       | ENSG00000128709 | 3'UTR         | c.*269G>A               |
| 1005   | HRH1      | chr3       | ENSG00000196639 | Silent        | c.445C>T                |

| Number | Gene name  | Chromosome | Gene_ID         | Mutation      | Nucleotide substitution |
|--------|------------|------------|-----------------|---------------|-------------------------|
| 1006   | HRH3       | chr20      | ENSG00000101180 | Silent        | c.126G>A                |
| 1007   | HS3ST1     | chr4       | ENSG00000002587 | 3'UTR         | c.*5654G>T              |
| 1008   | HS6ST1     | chr2       | ENSG00000136720 | 3'UTR         | c.*283C>T               |
| 1009   | HSD17B13   | chr4       | ENSG00000170509 | Missense      | c.670C>G                |
| 1010   | HSF4       | chr16      | ENSG00000102878 | Intron        | c.123+86G>A             |
| 1011   | HSPA12A    | chr10      | ENSG00000165868 | 3'UTR         | c.*886C>G               |
| 1012   | HSPA2      | chr14      | ENSG00000126803 | Missense      | c.319G>C                |
| 1013   | HSPA4L     | chr4       | ENSG00000164070 | Intron        | c.-92+96G>C             |
| 1014   | HSPB6      | chr19      | ENSG00000004776 | Intron        | c.-25-207C>G            |
| 1015   | HTRA1      | chr10      | ENSG00000166033 | Silent        | c.1407C>T               |
| 1016   | HTT        | chr4       | ENSG00000197386 | 3'UTR         | c.*693C>T               |
| 1017   | HUWE1      | chrX       | ENSG00000086758 | Silent        | c.1728C>G               |
| 1018   | IDH1       | chr2       | ENSG00000138413 | Missense      | c.1039G>C               |
| 1019   | IDS        | chrX       | ENSG00000010404 | 3'UTR         | c.*3944C>T              |
| 1020   | IFI6       | chr1       | ENSG00000126709 | 3'UTR         | c.*14G>A                |
| 1021   | IFIT5      | chr10      | ENSG00000152778 | 3'UTR         | c.*181C>G               |
| 1022   | IFITM10    | chr11      | ENSG00000244242 | Missense      | c.180C>A                |
| 1023   | IFRD1      | chr7       | ENSG00000006652 | 3'UTR         | c.*44dup                |
| 1024   | IFT122     | chr3       | ENSG00000163913 | Silent        | c.2487C>G               |
| 1025   | IFT140     | chr16      | ENSG00000187535 | Missense      | c.410G>A                |
| 1026   | IFT172     | chr2       | ENSG00000138002 | 3'UTR         | c.*18G>C                |
| 1027   | IFT172     | chr2       | ENSG00000138002 | 3'UTR         | c.*7G>A                 |
| 1028   | IFT172     | chr2       | ENSG00000138002 | Missense      | c.4822G>C               |
| 1029   | IFT81      | chr12      | ENSG00000122970 | Intron        | c.1848+43C>A            |
| 1030   | IFT88      | chr13      | ENSG00000032742 | Missense      | c.2050G>C               |
| 1031   | GHV3OR16-1 | chr16      | ENSG00000271178 | 3'Flank       |                         |
| 1032   | IGKC       | chr2       | ENSG00000211592 | Missense      | c.299G>C                |
| 1033   | IGSF10     | chr3       | ENSG00000152580 | Missense      | c.1702G>A               |
| 1034   | IGSF8      | chr1       | ENSG00000162729 | Intron        | c.64+65del              |
| 1035   | IKZF1      | chr7       | ENSG00000185811 | 3'UTR         | c.*1295G>A              |
| 1036   | IKZF3      | chr17      | ENSG00000161405 | 3'UTR         | c.*5912G>A              |
| 1037   | IKZF3      | chr17      | ENSG00000161405 | Missense      | c.994C>T                |
| 1038   | IL13RA1    | chrX       | ENSG00000131724 | Intron        | c.1192-11del            |
| 1039   | IL17D      | chr13      | ENSG00000172458 | Missense      | c.118G>C                |
| 1040   | IL27       | chr16      | ENSG00000197272 | 3'Flank       |                         |
| 1041   | IL6ST      | chr5       | ENSG00000134352 | Splice region | c.1552+4A>C             |
| 1042   | IL7R       | chr5       | ENSG00000168685 | Missense      | c.1144C>T               |
| 1043   | ILVBL      | chr19      | ENSG00000105135 | Silent        | c.186G>A                |
| 1044   | IMPG2      | chr3       | ENSG00000081148 | Silent        | c.507G>A                |
| 1045   | INPP5E     | chr9       | ENSG00000148384 | 5'UTR         | c.-32C>G                |
| 1046   | INSM1      | chr20      | ENSG00000173404 | Missense      | c.693C>A                |
| 1047   | INTS13     | chr12      | ENSG00000064102 | Intron        | c.979+21G>A             |
| 1048   | IP6K1      | chr3       | ENSG00000176095 | 3'UTR         | c.*2584C>G              |
| 1049   | IP6K1      | chr3       | ENSG00000176095 | 3'UTR         | c.*1419C>G              |
| 1050   | IP6K1      | chr3       | ENSG00000176095 | 3'UTR         | c.*623C>T               |
| 1051   | IPO4       | chr14      | ENSG00000196497 | Silent        | c.3144G>A               |
| 1052   | IQCB1      | chr3       | ENSG00000173226 | Intron        | c.1129+15C>G            |
| 1053   | IQCG       | chr3       | ENSG00000114473 | Missense      | c.130G>C                |
| 1054   | IQSEC2     | chrX       | ENSG00000124313 | Missense      | c.1064C>T               |
| 1055   | IRAK3      | chr12      | ENSG00000090376 | Missense      | c.34T>A                 |
| 1056   | IRAK3      | chr12      | ENSG00000090376 | 3'UTR         | c.*4549C>G              |
| 1057   | IRS2       | chr13      | ENSG00000185950 | Missense      | c.1226G>A               |
| 1058   | IRX5       | chr16      | ENSG00000176842 | 5'UTR         | c.-63C>T                |

| Number | Gene name | Chromosome | Gene_ID         | Mutation      | Nucleotide substitution |
|--------|-----------|------------|-----------------|---------------|-------------------------|
| 1059   | ISL2      | chr15      | ENSG00000159556 | 3'UTR         | c.*32C>G                |
| 1060   | ISY1      | chr3       | ENSG00000240682 | 3'UTR         | c.*1996C>T              |
| 1061   | ISY1      | chr3       | ENSG00000240682 | 3'UTR         | c.*1783G>T              |
| 1062   | ITCH      | chr20      | ENSG00000078747 | Missense      | c.2370G>C               |
| 1063   | ITGA1     | chr5       | ENSG00000213949 | Missense      | c.779A>G                |
| 1064   | ITGA1     | chr5       | ENSG00000213949 | Nonsense      | c.2050C>T               |
| 1065   | ITGA5     | chr12      | ENSG00000161638 | Missense      | c.2737G>C               |
| 1066   | ITGA8     | chr10      | ENSG00000077943 | 3'UTR         | c.*373G>A               |
| 1067   | ITGA8     | chr10      | ENSG00000077943 | 3'UTR         | c.*294G>C               |
| 1068   | ITGA9     | chr3       | ENSG00000144668 | 3'UTR         | c.*1616G>C              |
| 1069   | ITGB1     | chr10      | ENSG00000150093 | Intron        | c.2332-48A>C            |
| 1070   | ITGB4     | chr17      | ENSG00000132470 | Missense      | c.51G>C                 |
| 1071   | ITGB6     | chr2       | ENSG00000115221 | Missense      | c.1465C>T               |
| 1072   | ITPKA     | chr15      | ENSG00000137825 | 3'Flank       |                         |
| 1073   | ITPR1     | chr3       | ENSG00000150995 | Intron        | c.1961+61G>C            |
| 1074   | ITPR2     | chr12      | ENSG00000123104 | Missense      | c.3831C>G               |
| 1075   | ITSN1     | chr21      | ENSG00000205726 | 3'UTR         | c.*3018G>C              |
| 1076   | IYD       | chr6       | ENSG00000009765 | 3'UTR         | c.*5363_*5372del        |
| 1077   | JAK3      | chr19      | ENSG00000105639 | Intron        | c.421-25G>A             |
| 1078   | JAKMIP1   | chr4       | ENSG00000152969 | Silent        | c.1515C>A               |
| 1079   | JCAD      | chr10      | ENSG00000165757 | Missense      | c.1931G>C               |
| 1080   | JMJD1C    | chr10      | ENSG00000171988 | Missense      | c.7359C>A               |
| 1081   | JPT2      | chr16      | ENSG00000206053 | Intron        | c.45-1976C>T            |
| 1082   | JUN       | chr1       | ENSG00000177606 | 3'UTR         | c.*242T>G               |
| 1083   | KALRN     | chr3       | ENSG00000160145 | Intron        | c.67+30G>C              |
| 1084   | KALRN     | chr3       | ENSG00000160145 | 3'UTR         | c.*589C>T               |
| 1085   | KANK4     | chr1       | ENSG00000132854 | Missense      | c.1398G>C               |
| 1086   | KAT5      | chr11      | ENSG00000172977 | Missense      | c.1422C>G               |
| 1087   | KATNB1    | chr16      | ENSG00000140854 | Intron        | c.391-29C>G             |
| 1088   | KCNAB1    | chr3       | ENSG00000169282 | 5'UTR         | c.-828C>A               |
| 1089   | KCNC1     | chr11      | ENSG00000129159 | 3'UTR         | c.*319C>G               |
| 1090   | KCND1     | chrX       | ENSG00000102057 | Missense      | c.1811C>A               |
| 1091   | KCNE4     | chr2       | ENSG00000152049 | Silent        | c.618C>G                |
| 1092   | KCNIP4    | chr4       | ENSG00000185774 | 5'UTR         | c.-39G>A                |
| 1093   | KCNJ13    | chr2       | ENSG00000115474 | 3'UTR         | c.*562G>C               |
| 1094   | KCNJ15    | chr21      | ENSG00000157551 | Intron        | c.-398-48543G>A         |
| 1095   | KCNJ4     | chr22      | ENSG00000168135 | Silent        | c.45G>A                 |
| 1096   | KCNK10    | chr14      | ENSG00000100433 | 3'UTR         | c.*537G>A               |
| 1097   | KCNK9     | chr8       | ENSG00000169427 | Silent        | c.795C>A                |
| 1098   | KCNMA1    | chr10      | ENSG00000156113 | Intron        | c.1335-17C>T            |
| 1099   | KCNMB2    | chr3       | ENSG00000197584 | Intron        | c.-67-19C>A             |
| 1100   | KCNN2     | chr5       | ENSG00000080709 | Missense      | c.521C>G                |
| 1101   | KCNQ1     | chr11      | ENSG00000053918 | Intron        | c.387-6496G>A           |
| 1102   | KCTD12    | chr13      | ENSG00000178695 | Silent        | c.105C>T                |
| 1103   | KCTD3     | chr1       | ENSG00000136636 | Intron        | c.1021+27C>T            |
| 1104   | KCTD4     | chr13      | ENSG00000180332 | Missense      | c.220G>A                |
| 1105   | KCTD7     | chr7       | ENSG00000243335 | 5'UTR         | c.-159G>C               |
| 1106   | KDM2B     | chr12      | ENSG00000089094 | Missense      | c.25G>A                 |
| 1107   | KDM6A     | chrX       | ENSG00000147050 | Intron        | c.975-30G>A             |
| 1108   | KDR       | chr4       | ENSG00000128052 | Splice region | c.3848+4A>C             |
| 1109   | KHDC1L    | chr6       | ENSG00000256980 | 3'UTR         | c.*110C>G               |
| 1110   | KHDC1L    | chr6       | ENSG00000256980 | Silent        | c.24C>T                 |
| 1111   | KHDRBS1   | chr1       | ENSG00000121774 | 5'Flank       |                         |

| Number | Gene name | Chromosome | Gene_ID         | Mutation      | Nucleotide substitution |
|--------|-----------|------------|-----------------|---------------|-------------------------|
| 1112   | KIAA0319  | chr6       | ENSG00000137261 | Missense      | c.791C>G                |
| 1113   | KIAA1549  | chr7       | ENSG00000122778 | 3'UTR         | c.*4897C>G              |
| 1114   | KIAA1549  | chr7       | ENSG00000122778 | 3'UTR         | c.*3448C>T              |
| 1115   | KIAA1549  | chr7       | ENSG00000122778 | 3'UTR         | c.*1002C>T              |
| 1116   | KIAA1958  | chr9       | ENSG00000165185 | 3'UTR         | c.*7028G>T              |
| 1117   | KIAA2012  | chr2       | ENSG00000182329 | Splice region | c.2491+7G>C             |
| 1118   | KIF11     | chr10      | ENSG00000138160 | Missense      | c.1465G>C               |
| 1119   | KIF11     | chr10      | ENSG00000138160 | 3'UTR         | c.*713C>G               |
| 1120   | KIF13B    | chr8       | ENSG00000197892 | Missense      | c.1032C>A               |
| 1121   | KIF13B    | chr8       | ENSG00000197892 | Missense      | c.707C>A                |
| 1122   | KIF13B    | chr8       | ENSG00000197892 | Silent        | c.687C>T                |
| 1123   | KIF16B    | chr20      | ENSG00000089177 | Missense      | c.2164G>A               |
| 1124   | KIF19     | chr17      | ENSG00000196169 | Intron        | c.121-1001G>C           |
| 1125   | KIF1A     | chr2       | ENSG00000130294 | Splice region | c.3729-3C>G             |
| 1126   | KIF1B     | chr1       | ENSG00000054523 | Missense      | c.520C>T                |
| 1127   | KIF1B     | chr1       | ENSG00000054523 | Splice region | c.1223-7C>G             |
| 1128   | KIF1B     | chr1       | ENSG00000054523 | 3'UTR         | c.*2191C>G              |
| 1129   | KIF3C     | chr2       | ENSG00000084731 | Missense      | c.568G>C                |
| 1130   | KIFC3     | chr16      | ENSG00000140859 | Intron        | c.316-46G>A             |
| 1131   | KIT       | chr4       | ENSG00000157404 | Missense      | c.2515G>A               |
| 1132   | KLB       | chr4       | ENSG00000134962 | Missense      | c.173G>C                |
| 1133   | KLC4      | chr6       | ENSG00000137171 | 3'UTR         | c.*72C>T                |
| 1134   | KLF11     | chr2       | ENSG00000172059 | 3'UTR         | c.*240G>C               |
| 1135   | KLF17     | chr1       | ENSG00000171872 | Missense      | c.361C>G                |
| 1136   | KLF3      | chr4       | ENSG00000109787 | 3'UTR         | c.*1658C>T              |
| 1137   | KLHDC2    | chr14      | ENSG00000165516 | 5'Flank       |                         |
| 1138   | KLHL22    | chr22      | ENSG00000099910 | Intron        | c.228-41C>G             |
| 1139   | KLHL30    | chr2       | ENSG00000168427 | 3'UTR         | c.*202G>A               |
| 1140   | KLHL36    | chr16      | ENSG00000135686 | 3'UTR         | c.*543G>C               |
| 1141   | KLK1      | chr19      | ENSG00000167748 | Missense      | c.725C>T                |
| 1142   | KLK10     | chr19      | ENSG00000129451 | Intron        | c.270-14C>G             |
| 1143   | KLLN      | chr10      | ENSG00000227268 | Missense      | c.479G>C                |
| 1144   | KMT2D     | chr12      | ENSG00000167548 | Intron        | c.16053-40G>C           |
| 1145   | KNL1      | chr15      | ENSG00000137812 | Missense      | c.1340C>G               |
| 1146   | KNTC1     | chr12      | ENSG00000184445 | Missense      | c.1733G>C               |
| 1147   | KPNA1     | chr3       | ENSG00000114030 | 3'UTR         | c.*691G>C               |
| 1148   | KPNA1     | chr3       | ENSG00000114030 | Intron        | c.1122+25C>G            |
| 1149   | KPRP      | chr1       | ENSG00000203786 | Missense      | c.772C>A                |
| 1150   | KPTN      | chr19      | ENSG00000118162 | Silent        | c.153C>G                |
| 1151   | KRBOX1    | chr3       | ENSG00000240747 | 5'UTR         | c.-456C>T               |
| 1152   | KRT17     | chr17      | ENSG00000128422 | 3'UTR         | c.*6C>T                 |
| 1153   | KRT71     | chr12      | ENSG00000139648 | Intron        | c.657-14C>T             |
| 1154   | KRTAP19-8 | chr21      | ENSG00000206102 | 3'UTR         | c.*62C>T                |
| 1155   | KTNI      | chr14      | ENSG00000126777 | 5'UTR         | c.-243C>G               |
| 1156   | KY        | chr3       | ENSG00000174611 | Intron        | c.1090+167G>A           |
| 1157   | KYAT3     | chr1       | ENSG00000137944 | Intron        | c.-1-61C>G              |
| 1158   | L1TD1     | chr1       | ENSG00000240563 | Missense      | c.1840G>A               |
| 1159   | L2HGDH    | chr14      | ENSG00000087299 | 3'UTR         | c.*1261G>A              |
| 1160   | LAMC2     | chr1       | ENSG00000058085 | Silent        | c.1404C>T               |
| 1161   | LAMP1     | chr13      | ENSG00000185896 | Intron        | c.877-16C>A             |
| 1162   | LAT2      | chr7       | ENSG00000086730 | Intron        | c.178+52C>G             |
| 1163   | LCOR      | chr10      | ENSG00000196233 | 3'UTR         | c.*4508G>C              |
| 1164   | LCOR      | chr10      | ENSG00000196233 | Missense      | c.1445G>T               |

| Number | Gene name | Chromosome | Gene_ID         | Mutation | Nucleotide substitution |
|--------|-----------|------------|-----------------|----------|-------------------------|
| 1165   | LCOR      | chr10      | ENSG00000196233 | Missense | c.2209C>G               |
| 1166   | LCOR      | chr10      | ENSG00000196233 | Missense | c.2254G>A               |
| 1167   | LCOR      | chr10      | ENSG00000196233 | Missense | c.2565G>C               |
| 1168   | LCOR      | chr10      | ENSG00000196233 | Missense | c.2775G>C               |
| 1169   | LCOR      | chr10      | ENSG00000196233 | Nonsense | c.3673C>T               |
| 1170   | LCORL     | chr4       | ENSG00000178177 | Missense | c.5284C>G               |
| 1171   | LCP2      | chr5       | ENSG00000043462 | 5'UTR    | c.-12G>T                |
| 1172   | LDB1      | chr10      | ENSG00000198728 | 3'Flank  |                         |
| 1173   | LDB3      | chr10      | ENSG00000122367 | Silent   | c.1626C>T               |
| 1174   | LDLR      | chr19      | ENSG00000130164 | 3'UTR    | c.*719G>A               |
| 1175   | LEKR1     | chr3       | ENSG00000197980 | Intron   | c.264-32103C>G          |
| 1176   | LEPR      | chr1       | ENSG00000116678 | Silent   | c.3336C>T               |
| 1177   | LERFS     | chr9       | ENSG00000234665 | Intron   | n.445-3148C>G           |
| 1178   | LGALS3BP  | chr17      | ENSG00000108679 | 3'UTR    | c.*53C>G                |
| 1179   | LHPP      | chr10      | ENSG00000107902 | 3'UTR    | c.*154C>T               |
| 1180   | LIF       | chr22      | ENSG00000128342 | 3'UTR    | c.*1966C>G              |
| 1181   | LIF       | chr22      | ENSG00000128342 | 3'UTR    | c.*1501G>C              |
| 1182   | LIG1      | chr19      | ENSG00000105486 | Intron   | c.243+33G>A             |
| 1183   | LIMK1     | chr7       | ENSG00000106683 | Intron   | c.153-3639C>G           |
| 1184   | LIN54     | chr4       | ENSG00000189308 | 3'UTR    | c.*2819G>C              |
| 1185   | LIN7B     | chr19      | ENSG00000104863 | Missense | c.271C>T                |
| 1186   | LINC00636 | chr3       | ENSG00000240423 | RNA      | n.594G>C                |
| 1187   | LINC01405 | chr12      | ENSG00000185847 | RNA      | n.185C>G                |
| 1188   | LINC01804 | chr2       | ENSG00000231031 | Intron   | n.283-38G>A             |
| 1189   | LINC02520 | chr6       | ENSG00000204110 | 3'Flank  |                         |
| 1190   | LIPE      | chr19      | ENSG00000079435 | Silent   | c.2085G>A               |
| 1191   | LLGL2     | chr17      | ENSG00000073350 | Missense | c.1233G>C               |
| 1192   | LNPEP     | chr5       | ENSG00000113441 | 3'UTR    | c.*3608C>G              |
| 1193   | LONP2     | chr16      | ENSG00000102910 | Missense | c.1208G>A               |
| 1194   | LONP2     | chr16      | ENSG00000102910 | 3'UTR    | c.*2757G>C              |
| 1195   | LOX       | chr5       | ENSG00000113083 | 3'UTR    | c.*2991T>G              |
| 1196   | LPA       | chr6       | ENSG00000198670 | Missense | c.5075G>C               |
| 1197   | LPIN3     | chr20      | ENSG00000132793 | Missense | c.1156T>G               |
| 1198   | LPP       | chr3       | ENSG00000145012 | 3'UTR    | c.*2123G>A              |
| 1199   | LPP       | chr3       | ENSG00000145012 | 3'UTR    | c.*5255G>C              |
| 1200   | LPP       | chr3       | ENSG00000145012 | 3'UTR    | c.*13523C>T             |
| 1201   | LPP       | chr3       | ENSG00000145012 | 3'UTR    | c.*14279G>C             |
| 1202   | LRCH1     | chr13      | ENSG00000136141 | Missense | c.331G>A                |
| 1203   | LRCH3     | chr3       | ENSG00000186001 | Intron   | c.2053-3038T>G          |
| 1204   | LRFN5     | chr14      | ENSG00000165379 | Missense | c.376C>T                |
| 1205   | LRIT2     | chr10      | ENSG00000204033 | Nonsense | c.430G>T                |
| 1206   | LRP1      | chr12      | ENSG00000123384 | Missense | c.6392C>T               |
| 1207   | LRP10     | chr14      | ENSG00000197324 | Intron   | c.1425-58G>C            |
| 1208   | LRP11     | chr6       | ENSG00000120256 | Missense | c.535A>G                |
| 1209   | LRP8      | chr1       | ENSG00000157193 | Silent   | c.1011G>A               |
| 1210   | LRRC27    | chr10      | ENSG00000148814 | Intron   | c.*17-33C>A             |
| 1211   | LRRC40    | chr1       | ENSG00000066557 | Missense | c.532G>A                |
| 1212   | LRRC41    | chr1       | ENSG00000132128 | Missense | c.1048G>C               |
| 1213   | LRRD1     | chr7       | ENSG00000240720 | 3'UTR    | c.*916G>C               |
| 1214   | LRRN4     | chr20      | ENSG00000125872 | Silent   | c.168G>T                |
| 1215   | LSG1      | chr3       | ENSG00000041802 | Intron   | c.1544-29G>C            |
| 1216   | LTBP1     | chr2       | ENSG00000049323 | Missense | c.162C>G                |
| 1217   | LTBP3     | chr11      | ENSG00000168056 | Missense | c.3253G>C               |

| Number | Gene name | Chromosome | Gene_ID         | Mutation      | Nucleotide substitution |
|--------|-----------|------------|-----------------|---------------|-------------------------|
| 1218   | LTBP4     | chr19      | ENSG00000090006 | Missense      | c.198G>C                |
| 1219   | LTF       | chr3       | ENSG00000012223 | Intron        | c.43+34G>C              |
| 1220   | LTK       | chr15      | ENSG00000062524 | Intron        | c.1541+203C>G           |
| 1221   | LUC7L     | chr16      | ENSG00000007392 | Intron        | c.157-11C>G             |
| 1222   | LUC7L2    | chr7       | ENSG00000146963 | 3'UTR         | c.*1006C>T              |
| 1223   | LVRN      | chr5       | ENSG00000172901 | Intron        | c.2757-1352C>G          |
| 1224   | LVRN      | chr5       | ENSG00000172901 | Intron        | c.2757-703C>G           |
| 1225   | LY6K      | chr8       | ENSG00000160886 | 3'UTR         | c.*4G>A                 |
| 1226   | LY9       | chr1       | ENSG00000122224 | Splice region | c.1498+8C>A             |
| 1227   | LYG1      | chr2       | ENSG00000144214 | Missense      | c.196C>G                |
| 1228   | LYG1      | chr2       | ENSG00000144214 | 5'Flank       |                         |
| 1229   | LYSMD2    | chr15      | ENSG00000140280 | Silent        | c.636C>G                |
| 1230   | LYZL1     | chr10      | ENSG00000120563 | Intron        | c.437-13C>T             |
| 1231   | LYZL1     | chr10      | ENSG00000120563 | Intron        | c.437-9C>G              |
| 1232   | LZIC      | chr1       | ENSG00000162441 | 3'UTR         | c.*786G>A               |
| 1233   | LZTS2     | chr10      | ENSG00000107816 | 5'UTR         | c.-2822G>C              |
| 1234   | MACF1     | chr1       | ENSG00000127603 | Missense      | c.2245G>A               |
| 1235   | MACF1     | chr1       | ENSG00000127603 | Silent        | c.2715G>A               |
| 1236   | MAFG      | chr17      | ENSG00000197063 | Missense      | c.208G>A                |
| 1237   | MAGEE1    | chrX       | ENSG00000198934 | Missense      | c.776C>T                |
| 1238   | MAN1A1    | chr6       | ENSG00000111885 | 3'UTR         | c.*1286G>C              |
| 1239   | MAP1A     | chr15      | ENSG00000166963 | Missense      | c.633G>C                |
| 1240   | MAP1LC3B  | chr16      | ENSG00000140941 | 5'UTR         | c.-322G>A               |
| 1241   | MAP1LC3B  | chr16      | ENSG00000140941 | Missense      | c.52G>C                 |
| 1242   | MAP2K5    | chr15      | ENSG00000137764 | Missense      | c.845G>C                |
| 1243   | MAP4      | chr3       | ENSG00000047849 | Silent        | c.1206C>T               |
| 1244   | MAP4      | chr3       | ENSG00000047849 | Missense      | c.889G>A                |
| 1245   | MAP4K5    | chr14      | ENSG00000012983 | Missense      | c.2467G>C               |
| 1246   | MAP6      | chr11      | ENSG00000171533 | 3'UTR         | c.*55C>T                |
| 1247   | MAP7D1    | chr1       | ENSG00000116871 | Intron        | c.2117-42C>G            |
| 1248   | MAP7D3    | chrX       | ENSG00000129680 | Missense      | c.521C>G                |
| 1249   | MAP9      | chr4       | ENSG00000164114 | Missense      | c.1115C>T               |
| 1250   | MAPK8IP1  | chr11      | ENSG00000121653 | Missense      | c.1000G>A               |
| 1251   | MARCH9    | chr12      | ENSG00000139266 | 5'UTR         | c.-327C>T               |
| 1252   | MARCO     | chr2       | ENSG00000019169 | Intron        | c.568+20G>C             |
| 1253   | MARK2     | chr11      | ENSG00000072518 | Intron        | c.55-6093G>C            |
| 1254   | MARK4     | chr19      | ENSG00000007047 | Silent        | c.732C>T                |
| 1255   | MASP1     | chr3       | ENSG00000127241 | Missense      | c.1433C>G               |
| 1256   | MAST2     | chr1       | ENSG00000086015 | Missense      | c.4318G>A               |
| 1257   | MAST4     | chr5       | ENSG00000069020 | Missense      | c.1828G>A               |
| 1258   | MAT2B     | chr5       | ENSG00000038274 | 3'UTR         | c.*118C>G               |
| 1259   | MAVS      | chr20      | ENSG00000088888 | Silent        | c.48C>T                 |
| 1260   | MAX       | chr14      | ENSG00000125952 | 3'UTR         | c.*1350C>G              |
| 1261   | MAZ       | chr16      | ENSG00000103495 | Missense      | c.541G>C                |
| 1262   | MAZ       | chr16      | ENSG00000103495 | Missense      | c.1032G>C               |
| 1263   | MBD3L1    | chr19      | ENSG00000170948 | Nonsense      | c.251C>G                |
| 1264   | MBD6      | chr12      | ENSG00000166987 | Silent        | c.1245G>C               |
| 1265   | MBD6      | chr12      | ENSG00000166987 | Nonsense      | c.2003C>G               |
| 1266   | MBD6      | chr12      | ENSG00000166987 | Silent        | c.2334C>A               |
| 1267   | MBOAT2    | chr2       | ENSG00000143797 | Missense      | c.1485G>C               |
| 1268   | MCFD2     | chr2       | ENSG00000180398 | 3'UTR         | c.*2867G>A              |
| 1269   | MCIDAS    | chr5       | ENSG00000234602 | Intron        | c.309+53C>T             |
| 1270   | MCM2      | chr3       | ENSG00000073111 | Missense      | c.2584G>A               |



| Number | Gene name | Chromosome | Gene_ID         | Mutation      | Nucleotide substitution   |
|--------|-----------|------------|-----------------|---------------|---------------------------|
| 1271   | MCM4      | chr8       | ENSG00000104738 | 3'UTR         | c.*1082C>T                |
| 1272   | MCMBP     | chr10      | ENSG00000197771 | Intron        | c.1548+41G>T              |
| 1273   | MCMBP     | chr10      | ENSG00000197771 | 5'UTR         | c.-160G>C                 |
| 1274   | MDGA1     | chr6       | ENSG00000112139 | 5'UTR         | c.-114C>G                 |
| 1275   | MDH1B     | chr2       | ENSG00000138400 | Missense      | c.280G>C                  |
| 1276   | MDK       | chr11      | ENSG00000110492 | 5'UTR         | c.-32G>C                  |
| 1277   | MECOM     | chr3       | ENSG00000085276 | 3'UTR         | c.*1202G>A                |
| 1278   | MED13     | chr17      | ENSG00000108510 | Splice region | c.1010-3C>T               |
| 1279   | MED13     | chr17      | ENSG00000108510 | 5'UTR         | c.-73C>G                  |
| 1280   | MED16     | chr19      | ENSG00000175221 | Missense      | c.1085C>T                 |
| 1281   | MED24     | chr17      | ENSG00000008838 | Silent        | c.1158G>A                 |
| 1282   | MED24     | chr17      | ENSG00000008838 | Missense      | c.924G>C                  |
| 1283   | MEF2B     | chr19      | ENSG00000213999 | Missense      | c.727C>T                  |
| 1284   | MEF2D     | chr1       | ENSG00000116604 | 3'UTR         | c.*1440C>G                |
| 1285   | MEGF10    | chr5       | ENSG00000145794 | Silent        | c.201T>C                  |
| 1286   | MEGF10    | chr5       | ENSG00000145794 | Intron        | c.1693+110G>A             |
| 1287   | MEGF11    | chr15      | ENSG00000157890 | 3'UTR         | c.*135G>C                 |
| 1288   | MEIOB     | chr16      | ENSG00000162039 | Splice region | c.1308C>T                 |
| 1289   | MEPE      | chr4       | ENSG00000152595 | Missense      | c.1534G>A                 |
| 1290   | METAP1    | chr4       | ENSG00000164024 | Missense      | c.700G>A                  |
| 1291   | METRN     | chr16      | ENSG00000103260 | Silent        | c.648C>G                  |
| 1292   | METTL25   | chr12      | ENSG00000127720 | Silent        | c.1533C>G                 |
| 1293   | MFN1      | chr3       | ENSG00000171109 | Silent        | c.954G>A                  |
| 1294   | MFSD1     | chr3       | ENSG00000118855 | Intron        | c.864-406G>C              |
| 1295   | MFSD1     | chr3       | ENSG00000118855 | Intron        | c.864-388 864-387delinsCC |
| 1296   | MFSD13A   | chr10      | ENSG00000138111 | 3'Flank       |                           |
| 1297   | MFSD14A   | chr1       | ENSG00000156875 | 3'UTR         | c.*1125C>T                |
| 1298   | MFSD4B    | chr6       | ENSG00000173214 | 5'UTR         | c.-159G>C                 |
| 1299   | MFSD6     | chr2       | ENSG00000151690 | Missense      | c.548C>T                  |
| 1300   | MFSD6     | chr2       | ENSG00000151690 | Intron        | c.2172+41C>G              |
| 1301   | MFSD9     | chr2       | ENSG00000135953 | Silent        | c.882G>A                  |
| 1302   | MGA       | chr15      | ENSG00000174197 | Missense      | c.1844G>T                 |
| 1303   | MGA       | chr15      | ENSG00000174197 | Missense      | c.2701C>G                 |
| 1304   | MGAT4EP   | chr1       | ENSG00000184774 | RNA           | n.1497G>A                 |
| 1305   | MGRN1     | chr16      | ENSG00000102858 | 5'UTR         | c.-22C>G                  |
| 1306   | MID1      | chrX       | ENSG00000101871 | Missense      | c.898G>C                  |
| 1307   | MIF4GD    | chr17      | ENSG00000125457 | Silent        | c.663C>G                  |
| 1308   | MIIP      | chr1       | ENSG00000116691 | Missense      | c.1151C>G                 |
| 1309   | MIR4771-1 | chr2       | ENSG00000264793 | 3'Flank       |                           |
| 1310   | MIR5692B  | chr21      | ENSG00000264580 | 3'Flank       |                           |
| 1311   | MLANA     | chr9       | ENSG00000120215 | Missense      | c.241C>G                  |
| 1312   | MLH3      | chr14      | ENSG00000119684 | 3'UTR         | c.*599G>C                 |
| 1313   | MLLT1     | chr19      | ENSG00000130382 | Silent        | c.867C>T                  |
| 1314   | MLLT3     | chr9       | ENSG00000171843 | 3'UTR         | c.*596C>A                 |
| 1315   | MLLT3     | chr9       | ENSG00000171843 | Intron        | c.194-45414C>G            |
| 1316   | MLXIP     | chr12      | ENSG00000175727 | 3'UTR         | c.*1519C>T                |
| 1317   | MMACHC    | chr1       | ENSG00000132763 | Missense      | c.310G>C                  |
| 1318   | MMACHC    | chr1       | ENSG00000132763 | 3'UTR         | c.*2311C>A                |
| 1319   | MMP1      | chr11      | ENSG00000196611 | Missense      | c.403G>A                  |
| 1320   | MMP14     | chr14      | ENSG00000157227 | 3'UTR         | c.*257G>A                 |
| 1321   | MMRN1     | chr4       | ENSG00000138722 | 3'UTR         | c.*587C>G                 |
| 1322   | MMRN1     | chr4       | ENSG00000138722 | 3'UTR         | c.*804C>T                 |
| 1323   | MMS22L    | chr6       | ENSG00000146263 | 3'UTR         | c.*4549G>A                |

| Number | Gene name | Chromosome | Gene_ID         | Mutation        | Nucleotide substitution |
|--------|-----------|------------|-----------------|-----------------|-------------------------|
| 1324   | MN1       | chr22      | ENSG00000169184 | 3'UTR           | c.*1980C>T              |
| 1325   | MNX1      | chr7       | ENSG00000130675 | Silent          | c.33T>C                 |
| 1326   | MOCOS     | chr18      | ENSG00000075643 | 3'UTR           | c.*940C>T               |
| 1327   | MOCOS3    | chr20      | ENSG00000124217 | Nonsense        | c.419C>A                |
| 1328   | MOGAT3    | chr7       | ENSG00000106384 | Silent          | c.402C>T                |
| 1329   | MON2      | chr12      | ENSG00000061987 | Intron          | c.2365-48C>T            |
| 1330   | MOV10L1   | chr22      | ENSG00000073146 | Missense        | c.1504G>C               |
| 1331   | MOV10L1   | chr22      | ENSG00000073146 | Missense        | c.1567G>A               |
| 1332   | MPEG1     | chr11      | ENSG00000197629 | Missense        | c.1939G>A               |
| 1333   | MPI       | chr15      | ENSG00000178802 | 3'UTR           | c.*1145C>A              |
| 1334   | MR1       | chr1       | ENSG00000153029 | 3'UTR           | c.*112G>T               |
| 1335   | MR1       | chr1       | ENSG00000153029 | 3'UTR           | c.*729G>C               |
| 1336   | MRGPRX4   | chr11      | ENSG00000179817 | 5'UTR           | c.-352C>T               |
| 1337   | MROH1     | chr8       | ENSG00000179832 | Missense        | c.2011G>C               |
| 1338   | MROH2B    | chr5       | ENSG00000171495 | Missense        | c.3325G>A               |
| 1339   | MROH8     | chr20      | ENSG00000101353 | Missense        | c.445G>C                |
| 1340   | MRPL11    | chr11      | ENSG00000174547 | Silent          | c.33C>T                 |
| 1341   | MRPL11    | chr11      | ENSG00000174547 | 5'UTR           | c.-48C>A                |
| 1342   | MRPL11    | chr11      | ENSG00000174547 | 5'Flank         |                         |
| 1343   | MRPL18    | chr6       | ENSG00000112110 | Intron          | c.52+84C>G              |
| 1344   | MRPL30    | chr2       | ENSG00000185414 | Intron          | c.-27-282C>T            |
| 1345   | MRPS26    | chr20      | ENSG00000125901 | Silent          | c.366G>A                |
| 1346   | MRPS35    | chr12      | ENSG00000061794 | Frame Shift Ins | c.121dup                |
| 1347   | MRTFB     | chr16      | ENSG00000186260 | Missense        | c.466G>C                |
| 1348   | MT3       | chr16      | ENSG00000087250 | Missense        | c.163G>C                |
| 1349   | MTA1      | chr14      | ENSG00000182979 | Intron          | c.1813+880C>G           |
| 1350   | MTERF1    | chr7       | ENSG00000127989 | Missense        | c.46A>C                 |
| 1351   | MTFR1L    | chr1       | ENSG00000117640 | 5'UTR           | c.-1211G>C              |
| 1352   | MTHFR     | chr1       | ENSG00000177000 | 3'UTR           | c.*3085G>A              |
| 1353   | MTRF1L    | chr6       | ENSG00000112031 | Missense        | c.229G>A                |
| 1354   | MUC16     | chr19      | ENSG00000181143 | Missense        | c.42778G>A              |
| 1355   | MUC16     | chr19      | ENSG00000181143 | Missense        | c.36653C>A              |
| 1356   | MUC16     | chr19      | ENSG00000181143 | Missense        | c.30806C>T              |
| 1357   | MUC5AC    | chr11      | ENSG00000215182 | Nonsense        | c.1592C>G               |
| 1358   | MUC5AC    | chr11      | ENSG00000215182 | Silent          | c.1755C>T               |
| 1359   | MUC5AC    | chr11      | ENSG00000215182 | Silent          | c.15462C>G              |
| 1360   | MUC5B     | chr11      | ENSG00000117983 | Silent          | c.1146C>T               |
| 1361   | MUCL1     | chr12      | ENSG00000172551 | 3'UTR           | c.*22C>A                |
| 1362   | MVB12B    | chr9       | ENSG00000196814 | Intron          | c.874-76G>C             |
| 1363   | MVD       | chr16      | ENSG00000167508 | Splice region   | c.142-3C>A              |
| 1364   | MX2       | chr21      | ENSG00000183486 | Missense        | c.1832C>G               |
| 1365   | MXD4      | chr4       | ENSG00000123933 | Intron          | c.65-21G>A              |
| 1366   | MXRA5     | chrX       | ENSG00000101825 | Missense        | c.2932T>A               |
| 1367   | MYBPC3    | chr11      | ENSG00000134571 | Silent          | c.1785C>T               |
| 1368   | MYBPHL    | chr1       | ENSG00000221986 | Intron          | c.570+33G>A             |
| 1369   | MYBPHL    | chr1       | ENSG00000221986 | Silent          | c.177G>A                |
| 1370   | MYH14     | chr19      | ENSG00000105357 | Silent          | c.225G>A                |
| 1371   | MYH15     | chr3       | ENSG00000144821 | Missense        | c.3130G>A               |
| 1372   | MYL9      | chr20      | ENSG00000101335 | 3'UTR           | c.*351G>T               |
| 1373   | MYLK      | chr3       | ENSG00000065534 | Intron          | c.166-25T>G             |
| 1374   | MYLPF     | chr16      | ENSG00000180209 | Missense        | c.193G>A                |
| 1375   | MYO16     | chr13      | ENSG00000041515 | 3'UTR           | c.*238C>T               |
| 1376   | MYO18B    | chr22      | ENSG00000133454 | Missense        | c.4582G>C               |

| Number | Gene name | Chromosome | Gene_ID         | Mutation      | Nucleotide substitution |
|--------|-----------|------------|-----------------|---------------|-------------------------|
| 1377   | MYO1B     | chr2       | ENSG00000128641 | 3'UTR         | c.*923C>T               |
| 1378   | MYO9A     | chr15      | ENSG00000066933 | Missense      | c.1576C>G               |
| 1379   | MYOF      | chr10      | ENSG00000138119 | Intron        | c.346-61G>C             |
| 1380   | NAA15     | chr4       | ENSG00000164134 | 3'UTR         | c.*808C>G               |
| 1381   | NAA30     | chr14      | ENSG00000139977 | 3'UTR         | c.*945C>T               |
| 1382   | NAAA      | chr4       | ENSG00000138744 | Intron        | c.903-78C>T             |
| 1383   | NAALADL2  | chr3       | ENSG00000177694 | 3'UTR         | c.*1702G>C              |
| 1384   | NAB2      | chr12      | ENSG00000166886 | Missense      | c.1115G>A               |
| 1385   | NABP1     | chr2       | ENSG00000173559 | Intron        | c.-149-261C>G           |
| 1386   | NACAD     | chr7       | ENSG00000136274 | Missense      | c.692C>T                |
| 1387   | NAE1      | chr16      | ENSG00000159593 | Silent        | c.63C>T                 |
| 1388   | NAGA      | chr22      | ENSG00000198951 | Missense      | c.906G>A                |
| 1389   | NANOS1    | chr10      | ENSG00000188613 | 3'UTR         | c.*120C>T               |
| 1390   | NAT10     | chr11      | ENSG00000135372 | Missense      | c.37C>G                 |
| 1391   | NBEAL1    | chr2       | ENSG00000144426 | Missense      | c.2026G>A               |
| 1392   | NBEAL1    | chr2       | ENSG00000144426 | 3'UTR         | c.*2195C>G              |
| 1393   | NBL1      | chr1       | ENSG00000158747 | 5'UTR         | c.-6G>A                 |
| 1394   | NCAN      | chr19      | ENSG00000130287 | Intron        | c.1661-36G>C            |
| 1395   | NCF1      | chr7       | ENSG00000158517 | Intron        | c.73-44C>G              |
| 1396   | NCKAP5    | chr2       | ENSG00000176771 | Missense      | c.4552C>T               |
| 1397   | NCL       | chr2       | ENSG00000115053 | Missense      | c.700G>A                |
| 1398   | NCLN      | chr19      | ENSG00000125912 | Silent        | c.867G>A                |
| 1399   | NCMAP     | chr1       | ENSG00000184454 | 3'UTR         | c.*2529C>G              |
| 1400   | NCMAP     | chr1       | ENSG00000184454 | 3'UTR         | c.*2603G>C              |
| 1401   | NCOR1     | chr17      | ENSG00000141027 | Intron        | c.909+83G>C             |
| 1402   | NCOR2     | chr12      | ENSG00000196498 | Intron        | c.312-13C>G             |
| 1403   | NCS1      | chr9       | ENSG00000107130 | Intron        | c.308-22C>G             |
| 1404   | NDRG3     | chr20      | ENSG00000101079 | 5'UTR         | c.-14C>T                |
| 1405   | NDRG4     | chr16      | ENSG00000103034 | Intron        | c.72+87G>A              |
| 1406   | NDUFAF7   | chr2       | ENSG00000003509 | Intron        | c.217-46T>G             |
| 1407   | NDUFV3    | chr21      | ENSG00000160194 | Missense      | c.325G>T                |
| 1408   | NDUFV3    | chr21      | ENSG00000160194 | Missense      | c.583G>C                |
| 1409   | NDUFV3    | chr21      | ENSG00000160194 | Missense      | c.664G>C                |
| 1410   | NDUFV3    | chr21      | ENSG00000160194 | Missense      | c.769G>C                |
| 1411   | NDUFV3    | chr21      | ENSG00000160194 | Missense      | c.1122G>C               |
| 1412   | NEDD4     | chr15      | ENSG00000069869 | Missense      | c.2018G>T               |
| 1413   | NEK1      | chr4       | ENSG00000137601 | Missense      | c.1041G>C               |
| 1414   | NEK7      | chr1       | ENSG00000151414 | 3'UTR         | c.*2348G>A              |
| 1415   | NEK8      | chr17      | ENSG00000160602 | Missense      | c.147G>C                |
| 1416   | NELL2     | chr12      | ENSG00000184613 | Intron        | c.125-145C>G            |
| 1417   | NEUROD2   | chr17      | ENSG00000171532 | Silent        | c.586C>T                |
| 1418   | NFASC     | chr1       | ENSG00000163531 | Intron        | c.1391+50C>T            |
| 1419   | NFIA      | chr1       | ENSG00000162599 | 3'UTR         | c.*2501C>T              |
| 1420   | NGEF      | chr2       | ENSG00000066248 | 3'UTR         | c.*598G>C               |
| 1421   | NGFR      | chr17      | ENSG00000064300 | 3'UTR         | c.*942C>G               |
| 1422   | NIN       | chr14      | ENSG00000100503 | 3'UTR         | c.*371G>C               |
| 1423   | NINL      | chr20      | ENSG00000101004 | Intron        | c.518-58G>A             |
| 1424   | NKX6-1    | chr4       | ENSG00000163623 | 3'UTR         | c.*209C>T               |
| 1425   | NLGN1     | chr3       | ENSG00000169760 | 3'UTR         | c.*612G>A               |
| 1426   | NLGN3     | chrX       | ENSG00000196338 | Splice region | c.1703+8G>C             |
| 1427   | NLRP5     | chr19      | ENSG00000171487 | Intron        | c.2277-18C>G            |
| 1428   | NMRK1     | chr9       | ENSG00000106733 | 3'UTR         | c.*294C>G               |
| 1429   | NOC3L     | chr10      | ENSG00000173145 | Splice region | c.859-3C>G              |

| Number | Gene name | Chromosome | Gene_ID         | Mutation      | Nucleotide substitution |
|--------|-----------|------------|-----------------|---------------|-------------------------|
| 1430   | NORAD     | chr20      | ENSG00000260032 | RNA           | n.410C>T                |
| 1431   | NOX5      | chr15      | ENSG00000255346 | 3'UTR         | c.*663G>C               |
| 1432   | NPAS4     | chr11      | ENSG00000174576 | 3'UTR         | c.*452C>T               |
| 1433   | NPBWR1    | chr8       | ENSG00000183729 | 5'UTR         | c.-501C>T               |
| 1434   | NPDC1     | chr9       | ENSG00000107281 | Silent        | c.366G>T                |
| 1435   | NPHP3     | chr3       | ENSG00000113971 | Intron        | c.1351-46C>G            |
| 1436   | NR2F2     | chr15      | ENSG00000185551 | 3'UTR         | c.*2110C>G              |
| 1437   | NR3C2     | chr4       | ENSG00000151623 | Missense      | c.2930A>C               |
| 1438   | NR5A2     | chr1       | ENSG00000116833 | 3'UTR         | c.*2405G>C              |
| 1439   | NRBP2     | chr8       | ENSG00000185189 | Intron        | c.1382-21C>T            |
| 1440   | NRG2      | chr5       | ENSG00000158458 | Missense      | c.2483G>C               |
| 1441   | NRG2      | chr5       | ENSG00000158458 | Missense      | c.1561G>A               |
| 1442   | NRL       | chr14      | ENSG00000129535 | 3'UTR         | c.*678C>T               |
| 1443   | NRL       | chr14      | ENSG00000129535 | 5'UTR         | c.-219G>A               |
| 1444   | NSG2      | chr5       | ENSG00000170091 | 3'UTR         | c.*184C>G               |
| 1445   | NSUN6     | chr10      | ENSG00000241058 | 5'UTR         | c.-364C>A               |
| 1446   | NT5C2     | chr10      | ENSG00000076685 | Missense      | c.471C>G                |
| 1447   | NT5DC4    | chr2       | ENSG00000144130 | Intron        | c.887-23C>G             |
| 1448   | NT5DC4    | chr2       | ENSG00000144130 | Missense      | c.1079G>A               |
| 1449   | NTMT1     | chr9       | ENSG00000148335 | 5'UTR         | c.-25G>A                |
| 1450   | NTRK1     | chr1       | ENSG00000198400 | Silent        | c.259C>T                |
| 1451   | NUAK1     | chr12      | ENSG00000074590 | 3'UTR         | c.*2945C>G              |
| 1452   | NUBP1     | chr16      | ENSG00000103274 | Intron        | c.328-86C>G             |
| 1453   | NUDCD3    | chr7       | ENSG00000015676 | 3'UTR         | c.*3583C>G              |
| 1454   | NUDCD3    | chr7       | ENSG00000015676 | Intron        | c.643-29G>A             |
| 1455   | NUDT3     | chr6       | ENSG00000272325 | 3'UTR         | c.*456C>G               |
| 1456   | NUP155    | chr5       | ENSG00000113569 | Splice region | c.3794-3C>G             |
| 1457   | NUP188    | chr9       | ENSG00000095319 | Intron        | c.2394-25C>T            |
| 1458   | NUP205    | chr7       | ENSG00000155561 | Intron        | c.4231+34C>G            |
| 1459   | NUP210    | chr3       | ENSG00000132182 | 3'UTR         | c.*501G>A               |
| 1460   | NUP210    | chr3       | ENSG00000132182 | Silent        | c.4686C>A               |
| 1461   | NUP214    | chr9       | ENSG00000126883 | Missense      | c.94G>A                 |
| 1462   | NUP214    | chr9       | ENSG00000126883 | Silent        | c.3225G>T               |
| 1463   | NXF1      | chr11      | ENSG00000162231 | Missense      | c.10G>A                 |
| 1464   | NXN       | chr17      | ENSG00000167693 | 3'UTR         | c.*489C>G               |
| 1465   | NXPE2     | chr11      | ENSG00000204361 | Silent        | c.120A>G                |
| 1466   | NYAP1     | chr7       | ENSG00000166924 | Missense      | c.811G>A                |
| 1467   | NYAP1     | chr7       | ENSG00000166924 | Missense      | c.2279C>A               |
| 1468   | NYAP2     | chr2       | ENSG00000144460 | Missense      | c.704C>T                |
| 1469   | OAF       | chr11      | ENSG00000184232 | 3'UTR         | c.*521G>A               |
| 1470   | OASL      | chr12      | ENSG00000135114 | 3'UTR         | c.*66C>T                |
| 1471   | OBSL1     | chr2       | ENSG00000124006 | Intron        | c.2953+731G>T           |
| 1472   | ODF3L1    | chr15      | ENSG00000182950 | 5'Flank       |                         |
| 1473   | OFCC1     | chr6       | ENSG00000181355 | RNA           | n.1271C>G               |
| 1474   | OLFM1     | chr9       | ENSG00000130558 | 3'UTR         | c.*315C>T               |
| 1475   | OMD       | chr9       | ENSG00000127083 | Missense      | c.1066C>G               |
| 1476   | ONECUT3   | chr19      | ENSG00000205922 | 5'Flank       |                         |
| 1477   | OOSP1     | chr11      | ENSG00000284873 | Missense      | c.326C>G                |
| 1478   | OPTN      | chr10      | ENSG00000123240 | Intron        | c.883-733G>C            |
| 1479   | OR13C8    | chr9       | ENSG00000186943 | Missense      | c.597G>A                |
| 1480   | OR2L13    | chr1       | ENSG00000196071 | Missense      | c.379C>T                |
| 1481   | OR51B5    | chr11      | ENSG00000167355 | Missense      | c.181C>G                |
| 1482   | OR51E1    | chr11      | ENSG00000180785 | Missense      | c.500A>C                |

| Number | Gene name  | Chromosome | Gene_ID         | Mutation      | Nucleotide substitution |
|--------|------------|------------|-----------------|---------------|-------------------------|
| 1483   | OR51I2     | chr11      | ENSG00000187918 | Missense      | c.415G>A                |
| 1484   | OR52L1     | chr11      | ENSG00000183313 | Silent        | c.813C>A                |
| 1485   | OR5A2      | chr11      | ENSG00000172324 | 3'UTR         | c.*104C>A               |
| 1486   | OR5H6      | chr3       | ENSG00000230301 | Intron        | c.-18-144C>G            |
| 1487   | OR6C68     | chr12      | ENSG00000205327 | Missense      | c.585G>C                |
| 1488   | ORMDL1     | chr2       | ENSG00000128699 | 3'UTR         | c.*279C>T               |
| 1489   | OSBPL1A    | chr18      | ENSG00000141447 | Missense      | c.1580C>G               |
| 1490   | OSBPL3     | chr7       | ENSG00000070882 | Silent        | c.765C>T                |
| 1491   | OTUB1      | chr11      | ENSG00000167770 | Silent        | c.819C>T                |
| 1492   | OTUD3      | chr1       | ENSG00000169914 | 3'UTR         | c.*3352C>G              |
| 1493   | OTUD4      | chr4       | ENSG00000164164 | 3'UTR         | c.*3215C>G              |
| 1494   | OVOL1      | chr11      | ENSG00000172818 | 5'UTR         | c.-264G>A               |
| 1495   | OXSRI      | chr3       | ENSG00000172939 | 3'UTR         | c.*255G>C               |
| 1496   | P2RY1      | chr3       | ENSG00000169860 | 5'UTR         | c.-324C>T               |
| 1497   | PA2G4      | chr12      | ENSG00000170515 | Intron        | c.487-35G>A             |
| 1498   | PAFAH1B2   | chr11      | ENSG00000168092 | Missense      | c.262C>G                |
| 1499   | PAG1       | chr8       | ENSG00000076641 | 3'UTR         | c.*301G>A               |
| 1500   | PAH        | chr12      | ENSG00000171759 | 3'UTR         | c.*1353G>C              |
| 1501   | PAIP2B     | chr2       | ENSG00000124374 | 3'UTR         | c.*1809C>G              |
| 1502   | PAK2       | chr3       | ENSG00000180370 | 3'UTR         | c.*3750G>A              |
| 1503   | PALD1      | chr10      | ENSG00000107719 | Silent        | c.2469C>T               |
| 1504   | PALM       | chr19      | ENSG00000099864 | Intron        | c.421-14C>T             |
| 1505   | PAM        | chr5       | ENSG00000145730 | Missense      | c.1375C>T               |
| 1506   | PAMR1      | chr11      | ENSG00000149090 | Splice region | c.259+8G>C              |
| 1507   | PANX3      | chr11      | ENSG00000154143 | Nonsense      | c.1126G>T               |
| 1508   | PAPOLG     | chr2       | ENSG00000115421 | Missense      | c.619G>A                |
| 1509   | PAQR6      | chr1       | ENSG00000160781 | Missense      | c.41C>T                 |
| 1510   | PARD6G     | chr18      | ENSG00000178184 | Intron        | c.296-2820G>A           |
| 1511   | PARD6G     | chr18      | ENSG00000178184 | 5'UTR         | c.-41G>A                |
| 1512   | PARM1      | chr4       | ENSG00000169116 | 5'UTR         | c.-146C>T               |
| 1513   | PARP1      | chr1       | ENSG00000143799 | Missense      | c.1855G>A               |
| 1514   | PARP8      | chr5       | ENSG00000151883 | 3'UTR         | c.*77C>G                |
| 1515   | PASK       | chr2       | ENSG00000115687 | Silent        | c.972G>A                |
| 1516   | PATL1      | chr11      | ENSG00000166889 | Nonsense      | c.13G>T                 |
| 1517   | PATZ1      | chr22      | ENSG00000100105 | Missense      | c.893G>A                |
| 1518   | PATZ1      | chr22      | ENSG00000100105 | 5'Flank       |                         |
| 1519   | PAWR       | chr12      | ENSG00000177425 | 3'UTR         | c.*1463G>A              |
| 1520   | PAX2       | chr10      | ENSG00000075891 | 3'UTR         | c.*2162G>C              |
| 1521   | PAX3       | chr2       | ENSG00000135903 | 3'UTR         | c.*363C>G               |
| 1522   | PAX5       | chr9       | ENSG00000196092 | 3'UTR         | c.*5193G>C              |
| 1523   | PAXIP1-AS2 | chr7       | ENSG00000214106 | RNA           | n.301G>A                |
| 1524   | PBLD       | chr10      | ENSG00000108187 | 5'UTR         | c.-31dup                |
| 1525   | PCARE      | chr2       | ENSG00000179270 | 3'UTR         | c.*1032C>G              |
| 1526   | PCDH10     | chr4       | ENSG00000138650 | Missense      | c.803T>A                |
| 1527   | PCDH18     | chr4       | ENSG00000189184 | Missense      | c.2032G>C               |
| 1528   | PCDH19     | chrX       | ENSG00000165194 | 3'UTR         | c.*1881G>T              |
| 1529   | PCDHB8     | chr5       | ENSG00000120322 | Nonsense      | c.2290G>T               |
| 1530   | PCDHGA5    | chr5       | ENSG00000253485 | Missense      | c.1528G>A               |
| 1531   | PCDHGA5    | chr5       | ENSG00000253485 | Missense      | c.1883C>T               |
| 1532   | PCDHGC4    | chr5       | ENSG00000242419 | Missense      | c.1600G>A               |
| 1533   | PCDHGC5    | chr5       | ENSG00000240764 | Nonsense      | c.277G>T                |
| 1534   | PCNX2      | chr1       | ENSG00000135749 | Missense      | c.5570G>A               |
| 1535   | PCNX4      | chr14      | ENSG00000126773 | Intron        | c.168-41C>G             |

| Number | Gene name | Chromosome | Gene_ID         | Mutation      | Nucleotide substitution |
|--------|-----------|------------|-----------------|---------------|-------------------------|
| 1536   | PCYT1B    | chrX       | ENSG00000102230 | 3'UTR         | c.*3580G>A              |
| 1537   | PDE10A    | chr6       | ENSG00000112541 | Intron        | c.1986-20C>G            |
| 1538   | PDE4C     | chr19      | ENSG00000285188 | Missense      | c.58C>T                 |
| 1539   | PDE4D     | chr5       | ENSG00000113448 | 3'UTR         | c.*2258G>A              |
| 1540   | PDE4D     | chr5       | ENSG00000113448 | Intron        | c.42+24717C>T           |
| 1541   | PDE6B     | chr4       | ENSG00000133256 | Silent        | c.1764C>T               |
| 1542   | PDE6B     | chr4       | ENSG00000133256 | Intron        | c.2269-26C>G            |
| 1543   | PDE6D     | chr2       | ENSG00000156973 | Intron        | c.-22+507G>A            |
| 1544   | PDE9A     | chr21      | ENSG00000160191 | Intron        | c.219-28C>G             |
| 1545   | PDE9A     | chr21      | ENSG00000160191 | Intron        | c.1768+77G>A            |
| 1546   | PDGFC     | chr4       | ENSG00000145431 | 3'UTR         | c.*136C>T               |
| 1547   | PDGFRA    | chr4       | ENSG00000134853 | Intron        | c.2156+421G>T           |
| 1548   | PDGFRA    | chr4       | ENSG00000134853 | Silent        | c.2244G>A               |
| 1549   | PDP1      | chr8       | ENSG00000164951 | 5'UTR         | c.-118G>C               |
| 1550   | PDZK1IP1  | chr1       | ENSG00000162366 | Intron        | c.176+24G>A             |
| 1551   | PEAK1     | chr15      | ENSG00000173517 | 3'UTR         | c.*582G>C               |
| 1552   | PER1      | chr17      | ENSG00000179094 | Intron        | c.1049-11C>T            |
| 1553   | PER3      | chr1       | ENSG00000049246 | Missense      | c.766G>C                |
| 1554   | PEX1      | chr7       | ENSG00000127980 | Missense      | c.1450G>C               |
| 1555   | PEX11A    | chr15      | ENSG00000166821 | Missense      | c.238C>G                |
| 1556   | PFKM      | chr12      | ENSG00000152556 | 5'UTR         | c.-32C>G                |
| 1557   | PGLS      | chr19      | ENSG00000130313 | Silent        | c.426C>T                |
| 1558   | PGLYRP4   | chr1       | ENSG00000163218 | 3'UTR         | c.*570C>T               |
| 1559   | PHACTR1   | chr6       | ENSG00000112137 | Silent        | c.702G>T                |
| 1560   | PHC1P1    | chr12      | ENSG00000179899 | 3'Flank       |                         |
| 1561   | PHC2      | chr1       | ENSG00000134686 | 3'UTR         | c.*756G>C               |
| 1562   | PHEX      | chrX       | ENSG00000102174 | Missense      | c.1270G>C               |
| 1563   | PHF21B    | chr22      | ENSG00000056487 | Intron        | c.1038+108G>A           |
| 1564   | PHF24     | chr9       | ENSG00000122733 | Splice region | c.1107-4C>G             |
| 1565   | PHKB      | chr16      | ENSG00000102893 | Intron        | c.2337-948G>C           |
| 1566   | PHLDB1    | chr11      | ENSG00000019144 | Missense      | c.2917C>T               |
| 1567   | PHLDB2    | chr3       | ENSG00000144824 | Intron        | c.1945-33G>A            |
| 1568   | PHLDB3    | chr19      | ENSG00000176531 | Intron        | c.952-62G>C             |
| 1569   | PII5      | chr8       | ENSG00000137558 | 3'UTR         | c.*2326C>G              |
| 1570   | PICALM    | chr11      | ENSG00000073921 | Missense      | c.1237C>G               |
| 1571   | PIEZO2    | chr18      | ENSG00000154864 | Missense      | c.3310G>C               |
| 1572   | PIGG      | chr4       | ENSG00000174227 | Missense      | c.437G>A                |
| 1573   | PIGQ      | chr16      | ENSG00000007541 | Silent        | c.261C>T                |
| 1574   | PIK3C3    | chr18      | ENSG00000078142 | 3'UTR         | c.*5771C>G              |
| 1575   | PIK3CA    | chr3       | ENSG00000121879 | Missense      | c.1258T>C               |
| 1576   | PIM2      | chrX       | ENSG00000102096 | 3'UTR         | c.*662G>C               |
| 1577   | PIP5K1B   | chr9       | ENSG00000107242 | Intron        | c.1502+306G>C           |
| 1578   | PIWIL4    | chr11      | ENSG00000134627 | 5'Flank       |                         |
| 1579   | PKD1L1    | chr7       | ENSG00000158683 | Missense      | c.4441G>C               |
| 1580   | PKD1L1    | chr7       | ENSG00000158683 | Silent        | c.1245C>G               |
| 1581   | PKD1L2    | chr16      | ENSG00000166473 | Intron        | c.301+28G>C             |
| 1582   | PKD2      | chr4       | ENSG00000118762 | Splice region | c.2240+5G>C             |
| 1583   | PKD2      | chr4       | ENSG00000118762 | 3'UTR         | c.*718C>G               |
| 1584   | PKHD1L1   | chr8       | ENSG00000205038 | Splice site   | c.10810_10828+13del     |
| 1585   | PKN1      | chr19      | ENSG00000123143 | Splice region | c.2294-3del             |
| 1586   | PKNOX1    | chr21      | ENSG00000160199 | 3'UTR         | c.*1391G>A              |
| 1587   | PLA2G4E   | chr15      | ENSG00000188089 | Intron        | c.394-26G>C             |
| 1588   | PLAA      | chr9       | ENSG00000137055 | Nonsense      | c.38C>A                 |

| Number | Gene name | Chromosome | Gene_ID         | Mutation      | Nucleotide substitution |
|--------|-----------|------------|-----------------|---------------|-------------------------|
| 1589   | PLCB1     | chr20      | ENSG00000182621 | Missense      | c.1881G>T               |
| 1590   | PLCB2     | chr15      | ENSG00000137841 | 3'UTR         | c.*183C>T               |
| 1591   | PLCE1     | chr10      | ENSG00000138193 | Intron        | c.5208+12G>A            |
| 1592   | PLCL2     | chr3       | ENSG00000154822 | Intron        | c.2058-54G>T            |
| 1593   | PLCL2     | chr3       | ENSG00000154822 | Intron        | c.2058-50C>T            |
| 1594   | PLCL2     | chr3       | ENSG00000154822 | 3'UTR         | c.*56G>A                |
| 1595   | PLCXD1    | chrX       | ENSG00000182378 | 3'UTR         | c.*3948C>T              |
| 1596   | PLD1      | chr3       | ENSG00000075651 | 3'UTR         | c.*1484G>C              |
| 1597   | PLEKHA5   | chr12      | ENSG00000052126 | Silent        | c.513C>G                |
| 1598   | PLEKHG1   | chr6       | ENSG00000120278 | 3'UTR         | c.*418A>C               |
| 1599   | PLEKHG6   | chr12      | ENSG00000008323 | Intron        | c.1671-18C>G            |
| 1600   | PLEKHH2   | chr2       | ENSG00000152527 | Nonsense      | c.776C>A                |
| 1601   | PLEKHH2   | chr2       | ENSG00000152527 | Missense      | c.920C>G                |
| 1602   | PLEKHJ1   | chr19      | ENSG00000104886 | Missense      | c.145C>T                |
| 1603   | PLEKHS1   | chr10      | ENSG00000148735 | Missense      | c.1291G>C               |
| 1604   | PLOD3     | chr7       | ENSG00000106397 | Intron        | c.1683+83C>T            |
| 1605   | PLPPR4    | chr1       | ENSG00000117600 | 3'UTR         | c.*887T>G               |
| 1606   | PLSCR4    | chr3       | ENSG00000114698 | 3'UTR         | c.*1579G>T              |
| 1607   | PLSCR4    | chr3       | ENSG00000114698 | Missense      | c.670G>A                |
| 1608   | PLXDC1    | chr17      | ENSG00000161381 | Missense      | c.73G>C                 |
| 1609   | PLXNA4    | chr7       | ENSG00000221866 | 3'UTR         | c.*6035G>C              |
| 1610   | PLXNA4    | chr7       | ENSG00000221866 | 3'UTR         | c.*5964C>G              |
| 1611   | PM20D2    | chr6       | ENSG00000146281 | Missense      | c.106G>C                |
| 1612   | PMFBP1    | chr16      | ENSG00000118557 | Missense      | c.2642G>A               |
| 1613   | PMS1      | chr2       | ENSG00000064933 | Missense      | c.1429C>G               |
| 1614   | PMS2      | chr7       | ENSG00000122512 | Intron        | c.23+50G>A              |
| 1615   | PMS2      | chr7       | ENSG00000122512 | 5'UTR         | c.-279G>C               |
| 1616   | PNKP      | chr19      | ENSG00000039650 | Splice region | c.1189-6C>T             |
| 1617   | PNMA2     | chr8       | ENSG00000240694 | 3'UTR         | c.*2391G>C              |
| 1618   | PODXL2    | chr3       | ENSG00000114631 | Missense      | c.496G>C                |
| 1619   | POF1B     | chrX       | ENSG00000124429 | 3'UTR         | c.*399C>T               |
| 1620   | POLA1     | chrX       | ENSG00000101868 | Missense      | c.3575C>G               |
| 1621   | POLD2     | chr7       | ENSG00000106628 | Missense      | c.1167T>G               |
| 1622   | POLE3     | chr9       | ENSG00000148229 | 3'UTR         | c.*1077C>T              |
| 1623   | POLR1B    | chr2       | ENSG00000125630 | Intron        | c.1746+55C>A            |
| 1624   | POLR2D    | chr2       | ENSG00000144231 | 3'UTR         | c.*1514G>A              |
| 1625   | POLR3A    | chr10      | ENSG00000148606 | 3'UTR         | c.*2300G>A              |
| 1626   | POLR3A    | chr10      | ENSG00000148606 | Missense      | c.1537G>C               |
| 1627   | POLR3H    | chr22      | ENSG00000100413 | 3'UTR         | c.*2187 *2191dup        |
| 1628   | POLRMTP1  | chr17      | ENSG00000266066 | RNA           | n.423G>C                |
| 1629   | POU2F2    | chr19      | ENSG00000028277 | Missense      | c.547G>C                |
| 1630   | PPAN      | chr19      | ENSG00000130810 | 5'UTR         | c.-59G>A                |
| 1631   | PPARGC1B  | chr5       | ENSG00000155846 | Silent        | c.2892G>A               |
| 1632   | PPBP      | chr4       | ENSG00000163736 | 3'UTR         | c.*84C>T                |
| 1633   | PPBP      | chr4       | ENSG00000163736 | 3'UTR         | c.*76C>T                |
| 1634   | PPFIA2    | chr12      | ENSG00000139220 | Nonsense      | c.208C>T                |
| 1635   | PPFIA4    | chr1       | ENSG00000143847 | Intron        | c.1267-10C>A            |
| 1636   | PPFIBP1   | chr12      | ENSG00000110841 | Silent        | c.348C>T                |
| 1637   | PPL       | chr16      | ENSG00000118898 | Nonsense      | c.3907C>T               |
| 1638   | PPM1L     | chr3       | ENSG00000163590 | 5'UTR         | c.-453C>T               |
| 1639   | PPP1R12B  | chr1       | ENSG00000077157 | Missense      | c.505G>C                |
| 1640   | PPP1R12C  | chr19      | ENSG00000125503 | 5'UTR         | c.-23A>G                |
| 1641   | PPP1R13B  | chr14      | ENSG00000088808 | 3'UTR         | c.*554C>G               |

| Number | Gene name | Chromosome | Gene_ID         | Mutation        | Nucleotide substitution |
|--------|-----------|------------|-----------------|-----------------|-------------------------|
| 1642   | PPP1R13B  | chr14      | ENSG00000088808 | 3'UTR           | c.*451C>A               |
| 1643   | PPP1R13B  | chr14      | ENSG00000088808 | 5'Flank         |                         |
| 1644   | PPP1R17   | chr7       | ENSG00000106341 | 3'UTR           | c.*637C>G               |
| 1645   | PPP1R1A   | chr12      | ENSG00000135447 | Intron          | c.511-86G>C             |
| 1646   | PPP1R2    | chr3       | ENSG00000184203 | 3'UTR           | c.*2072C>G              |
| 1647   | PPP1R35   | chr7       | ENSG00000160813 | Silent          | c.63C>T                 |
| 1648   | PPP1R9B   | chr17      | ENSG00000108819 | Missense        | c.646G>A                |
| 1649   | PPP1R9B   | chr17      | ENSG00000108819 | Silent          | c.288G>A                |
| 1650   | PPP2R2B   | chr5       | ENSG00000156475 | 3'UTR           | c.*263G>C               |
| 1651   | PPP2R2C   | chr4       | ENSG00000074211 | 3'UTR           | c.*549G>A               |
| 1652   | PPP2R2C   | chr4       | ENSG00000074211 | Intron          | c.71-165G>A             |
| 1653   | PPP2R2D   | chr10      | ENSG00000175470 | 3'UTR           | c.*749G>C               |
| 1654   | PPP2R5B   | chr11      | ENSG00000068971 | 3'UTR           | c.*193C>A               |
| 1655   | PPP6R3    | chr11      | ENSG00000110075 | Splice region   | c.1126-3C>G             |
| 1656   | PRAMEF1   | chr1       | ENSG00000116721 | Missense        | c.753_754delinsGC       |
| 1657   | PRAMEF20  | chr1       | ENSG00000204478 | 3'UTR           | c.*68C>T                |
| 1658   | PRC1      | chr15      | ENSG00000198901 | 5'UTR           | c.-329G>A               |
| 1659   | PRDM1     | chr6       | ENSG00000057657 | 5'UTR           | c.-149G>A               |
| 1660   | PRDM14    | chr8       | ENSG00000147596 | Intron          | c.755-14C>T             |
| 1661   | PRDM15    | chr21      | ENSG00000141956 | 3'UTR           | c.*940C>T               |
| 1662   | PRDM15    | chr21      | ENSG00000141956 | Silent          | c.1593G>A               |
| 1663   | PRDM15    | chr21      | ENSG00000141956 | Missense        | c.1555G>A               |
| 1664   | PRELID1   | chr5       | ENSG00000169230 | 3'UTR           | c.*83C>T                |
| 1665   | PREX2     | chr8       | ENSG00000046889 | Intron          | c.2715+3910C>G          |
| 1666   | PRKAA2    | chr1       | ENSG00000162409 | 3'UTR           | c.*6245C>T              |
| 1667   | PRKACB    | chr1       | ENSG00000142875 | 3'UTR           | c.*969G>C               |
| 1668   | PRKCE     | chr2       | ENSG00000171132 | Missense        | c.2014G>C               |
| 1669   | PRMT3     | chr11      | ENSG00000185238 | Intron          | c.560+43G>C             |
| 1670   | PROM1     | chr4       | ENSG00000007062 | 5'UTR           | c.-189C>T               |
| 1671   | PROM2     | chr2       | ENSG00000155066 | Splice site     | c.2335-1G>C             |
| 1672   | PROX1     | chr1       | ENSG00000117707 | Missense        | c.793G>A                |
| 1673   | PROZ      | chr13      | ENSG00000126231 | Missense        | c.180G>T                |
| 1674   | PRPF39    | chr14      | ENSG00000185246 | Splice region   | c.1758-3C>G             |
| 1675   | PRR36     | chr19      | ENSG00000183248 | Silent          | c.1524C>G               |
| 1676   | PRRT3     | chr3       | ENSG00000163704 | Silent          | c.1912C>A               |
| 1677   | PRSS56    | chr2       | ENSG00000237412 | Silent          | c.1383G>C               |
| 1678   | PRTFDC1   | chr10      | ENSG00000099256 | 3'UTR           | c.*297A>T               |
| 1679   | PRTG      | chr15      | ENSG00000166450 | 3'UTR           | c.*5214C>A              |
| 1680   | PSAPL1    | chr4       | ENSG00000178597 | 3'UTR           | c.*1198C>G              |
| 1681   | PSD4      | chr2       | ENSG00000125637 | Missense        | c.2875G>C               |
| 1682   | PSKH1     | chr16      | ENSG00000159792 | Missense        | c.1228G>C               |
| 1683   | PSKH2     | chr8       | ENSG00000147613 | Missense        | c.823C>G                |
| 1684   | PSMB4     | chr1       | ENSG00000159377 | 3'UTR           | c.*70G>A                |
| 1685   | PSMB7     | chr9       | ENSG00000136930 | Missense        | c.590G>A                |
| 1686   | PSMD5     | chr9       | ENSG00000095261 | 3'UTR           | c.*45G>C                |
| 1687   | PSMD5     | chr9       | ENSG00000095261 | 3'UTR           | c.*1809G>C              |
| 1688   | PSMD6     | chr3       | ENSG00000163636 | Missense        | c.253G>A                |
| 1689   | PSMD7     | chr16      | ENSG00000103035 | 3'Flank         |                         |
| 1690   | PSMD8     | chr19      | ENSG00000099341 | Missense        | c.112C>G                |
| 1691   | PSMG4     | chr6       | ENSG00000180822 | Frame Shift Del | c.199_212del            |
| 1692   | PSTPIP1   | chr15      | ENSG00000140368 | Intron          | c.418-63C>G             |
| 1693   | PTBP3     | chr9       | ENSG00000119314 | Missense        | c.568G>C                |
| 1694   | PTCD3     | chr2       | ENSG00000132300 | 3'UTR           | c.*4411A>C              |



| Number | Gene name | Chromosome | Gene_ID         | Mutation | Nucleotide substitution |
|--------|-----------|------------|-----------------|----------|-------------------------|
| 1695   | PTCH2     | chr1       | ENSG00000117425 | 3'UTR    | c.*723C>T               |
| 1696   | PTCH2     | chr1       | ENSG00000117425 | Silent   | c.549C>T                |
| 1697   | PTCHD1    | chrX       | ENSG00000165186 | 3'UTR    | c.*2487G>A              |
| 1698   | PTCHD1-AS | chrX       | ENSG00000233067 | Intron   | n.260-13556C>T          |
| 1699   | PTDSS1    | chr8       | ENSG00000156471 | 3'UTR    | c.*1476G>A              |
| 1700   | PTGES2    | chr9       | ENSG00000148334 | Missense | c.154C>G                |
| 1701   | PTGS2     | chr1       | ENSG00000073756 | Missense | c.1655C>G               |
| 1702   | PTK2B     | chr8       | ENSG00000120899 | Intron   | c.-38+21730T>A          |
| 1703   | PTMA      | chr2       | ENSG00000187514 | 5'UTR    | c.-198C>T               |
| 1704   | PTMA      | chr2       | ENSG00000187514 | Missense | c.61G>A                 |
| 1705   | PTMA      | chr2       | ENSG00000187514 | Intron   | c.289-64G>A             |
| 1706   | PTMA      | chr2       | ENSG00000187514 | 3'UTR    | c.*675G>C               |
| 1707   | PTPN1     | chr20      | ENSG00000196396 | Missense | c.588C>G                |
| 1708   | PTPN13    | chr4       | ENSG00000163629 | Missense | c.1078G>A               |
| 1709   | PTPN18    | chr2       | ENSG00000072135 | Missense | c.1366G>C               |
| 1710   | PTPN4     | chr2       | ENSG00000088179 | Missense | c.1843G>C               |
| 1711   | PTPRA     | chr20      | ENSG00000132670 | 3'UTR    | c.*435C>T               |
| 1712   | PTPRB     | chr12      | ENSG00000127329 | Missense | c.4802C>T               |
| 1713   | PTPRE     | chr10      | ENSG00000132334 | Missense | c.1771C>T               |
| 1714   | PTPRH     | chr19      | ENSG00000080031 | Silent   | c.2568C>T               |
| 1715   | PTPRN     | chr2       | ENSG00000054356 | Intron   | c.1604-11C>T            |
| 1716   | PTPRN2    | chr7       | ENSG00000155093 | 3'UTR    | c.*1650G>A              |
| 1717   | PTPRR     | chr12      | ENSG00000153233 | Missense | c.1225G>C               |
| 1718   | PTPRS     | chr19      | ENSG00000105426 | Intron   | c.1811-7185C>G          |
| 1719   | PTPRU     | chr1       | ENSG00000060656 | Missense | c.3982C>T               |
| 1720   | PUM2      | chr2       | ENSG00000055917 | Intron   | c.2217+22T>C            |
| 1721   | PXDN      | chr2       | ENSG00000130508 | Silent   | c.3975C>T               |
| 1722   | PXDNL     | chr8       | ENSG00000147485 | 3'UTR    | c.*47G>C                |
| 1723   | PXMP2     | chr12      | ENSG00000176894 | 5'UTR    | c.-74C>G                |
| 1724   | PXN       | chr12      | ENSG00000089159 | 3'UTR    | c.*188C>G               |
| 1725   | PXYLP1    | chr3       | ENSG00000155893 | 5'UTR    | c.-821G>C               |
| 1726   | PYGL      | chr14      | ENSG00000100504 | Intron   | c.1092+53G>A            |
| 1727   | PYGL      | chr14      | ENSG00000100504 | Intron   | c.773-17C>T             |
| 1728   | PYGO1     | chr15      | ENSG00000171016 | Missense | c.1102C>G               |
| 1729   | QSOX1     | chr1       | ENSG00000116260 | 3'UTR    | c.*4806C>G              |
| 1730   | RAB14     | chr9       | ENSG00000119396 | Missense | c.283A>G                |
| 1731   | RAB21     | chr12      | ENSG00000080371 | 5'UTR    | c.-143C>T               |
| 1732   | RAB35     | chr12      | ENSG00000111737 | 3'UTR    | c.*2059C>T              |
| 1733   | RAB3B     | chr1       | ENSG00000169213 | 3'UTR    | c.*6475C>G              |
| 1734   | RAB3B     | chr1       | ENSG00000169213 | 3'UTR    | c.*3019C>T              |
| 1735   | RAB3C     | chr5       | ENSG00000152932 | 3'UTR    | c.*6473G>T              |
| 1736   | RAB3GAP1  | chr2       | ENSG00000115839 | 3'UTR    | c.*881C>T               |
| 1737   | RAB40AL   | chrX       | ENSG00000102128 | 5'Flank  |                         |
| 1738   | RAB8B     | chr15      | ENSG00000166128 | 5'Flank  |                         |
| 1739   | RABGAP1   | chr9       | ENSG00000011454 | 3'UTR    | c.*1544C>T              |
| 1740   | RABGAP1L  | chr1       | ENSG00000152061 | Missense | c.1699C>G               |
| 1741   | RABGAP1L  | chr1       | ENSG00000152061 | Missense | c.820G>C                |
| 1742   | RABGAP1L  | chr1       | ENSG00000152061 | Missense | c.958G>A                |
| 1743   | RABGEF1   | chr7       | ENSG00000154710 | 5'UTR    | c.-898C>G               |
| 1744   | RABIF     | chr1       | ENSG00000183155 | Silent   | c.246C>T                |
| 1745   | RAD1      | chr5       | ENSG00000113456 | 3'UTR    | c.*1366G>A              |
| 1746   | RAD50     | chr5       | ENSG00000113522 | Missense | c.2007C>G               |
| 1747   | RAG1      | chr11      | ENSG00000166349 | Missense | c.2134G>A               |

| Number | Gene name | Chromosome | Gene_ID         | Mutation        | Nucleotide substitution |
|--------|-----------|------------|-----------------|-----------------|-------------------------|
| 1748   | RAN       | chr12      | ENSG00000132341 | Intron          | c.121+31T>G             |
| 1749   | RANBP2    | chr2       | ENSG00000153201 | Missense        | c.5456C>T               |
| 1750   | RANBP3    | chr19      | ENSG00000031823 | Intron          | c.78+23C>T              |
| 1751   | RAP1GAP   | chr1       | ENSG00000076864 | Intron          | c.395+81C>A             |
| 1752   | RAP2B     | chr3       | ENSG00000181467 | 3'UTR           | c.*4478C>T              |
| 1753   | RAPGEF1   | chr9       | ENSG00000107263 | Intron          | c.2580+48G>A            |
| 1754   | RAPGEF2   | chr4       | ENSG00000109756 | Missense        | c.920C>G                |
| 1755   | RAPGEF2   | chr4       | ENSG00000109756 | Nonsense        | c.4404G>A               |
| 1756   | RASAL2    | chr1       | ENSG00000075391 | Silent          | c.2709G>C               |
| 1757   | RASGRP4   | chr19      | ENSG00000171777 | Intron          | c.1244+21G>A            |
| 1758   | RAX2      | chr19      | ENSG00000173976 | 3'UTR           | c.*333G>A               |
| 1759   | RB1       | chr13      | ENSG00000139687 | Nonsense        | c.769C>T                |
| 1760   | BAK-RBAKD | chr7       | ENSG00000272968 | Intron          | c.*32+21G>C             |
| 1761   | BAK-RBAKD | chr7       | ENSG00000272968 | Intron          | c.*32+69G>A             |
| 1762   | RBCK1     | chr20      | ENSG00000125826 | Intron          | c.41+78G>C              |
| 1763   | RBFOX3    | chr17      | ENSG00000167281 | Missense        | c.505G>A                |
| 1764   | RBL2      | chr16      | ENSG00000103479 | 5'UTR           | c.-31C>A                |
| 1765   | RBM28     | chr7       | ENSG00000106344 | 5'UTR           | c.-104C>T               |
| 1766   | RBM46     | chr4       | ENSG00000151962 | Intron          | c.1403-7420C>G          |
| 1767   | RBMX      | chrX       | ENSG00000147274 | Missense        | c.688G>C                |
| 1768   | RBP3      | chr10      | ENSG00000265203 | Missense        | c.2476T>G               |
| 1769   | RBP5      | chr12      | ENSG00000139194 | Intron          | c.253-68G>C             |
| 1770   | RBPJ      | chr4       | ENSG00000168214 | Splice region   | c.672C>T                |
| 1771   | RBPJL     | chr20      | ENSG00000124232 | Silent          | c.159G>A                |
| 1772   | RBPM2     | chr15      | ENSG00000166831 | Intron          | c.88-10836G>C           |
| 1773   | RCC1L     | chr7       | ENSG00000274523 | Silent          | c.753C>G                |
| 1774   | RCHY1     | chr4       | ENSG00000163743 | Intron          | c.657+69G>C             |
| 1775   | RCOR2     | chr11      | ENSG00000167771 | Intron          | c.676-45C>G             |
| 1776   | RCOR3     | chr1       | ENSG00000117625 | 3'UTR           | c.*144G>A               |
| 1777   | RECQL5    | chr17      | ENSG00000108469 | Splice region   | c.1585+3C>T             |
| 1778   | REM1      | chr20      | ENSG00000088320 | Silent          | c.525C>T                |
| 1779   | RERG      | chr12      | ENSG00000134533 | 5'UTR           | c.-185G>C               |
| 1780   | REV3L     | chr6       | ENSG00000009413 | Missense        | c.770G>T                |
| 1781   | REXO1     | chr19      | ENSG00000079313 | Splice region   | c.3318-7C>T             |
| 1782   | RFC2      | chr7       | ENSG00000049541 | Missense        | c.8C>A                  |
| 1783   | RFX8      | chr2       | ENSG00000196460 | Intron          | c.184-88G>A             |
| 1784   | RFXANK    | chr19      | ENSG00000064490 | Frame Shift Del | c.406-409del            |
| 1785   | RGL1      | chr1       | ENSG00000143344 | Intron          | c.1336-40C>G            |
| 1786   | RGL3      | chr19      | ENSG00000205517 | Missense        | c.2113C>G               |
| 1787   | RGP1      | chr9       | ENSG00000107185 | 3'UTR           | c.*4118G>A              |
| 1788   | RGS12     | chr4       | ENSG00000159788 | Intron          | c.2283+33G>T            |
| 1789   | RGS7      | chr1       | ENSG00000182901 | Intron          | c.686+11C>A             |
| 1790   | RGS7BP    | chr5       | ENSG00000186479 | 5'UTR           | c.-201G>A               |
| 1791   | RHCE      | chr1       | ENSG00000188672 | 3'UTR           | c.*32C>G                |
| 1792   | RHOB      | chr2       | ENSG00000143878 | 3'UTR           | c.*750T>G               |
| 1793   | RHOB      | chr2       | ENSG00000143878 | 3'UTR           | c.*780C>G               |
| 1794   | RHOBTB3   | chr5       | ENSG00000164292 | Missense        | c.659G>C                |
| 1795   | RHOD      | chr11      | ENSG00000173156 | Intron          | c.132+67G>C             |
| 1796   | RIC3      | chr11      | ENSG00000166405 | 3'UTR           | c.*925C>T               |
| 1797   | RIF1      | chr2       | ENSG00000080345 | Missense        | c.4339G>A               |
| 1798   | RILPL1    | chr12      | ENSG00000188026 | Silent          | c.633G>A                |
| 1799   | RIMS1     | chr6       | ENSG00000079841 | Missense        | c.958G>C                |
| 1800   | RIMS1     | chr6       | ENSG00000079841 | Silent          | c.1530G>A               |

| Number | Gene name | Chromosome | Gene_ID         | Mutation      | Nucleotide substitution |
|--------|-----------|------------|-----------------|---------------|-------------------------|
| 1801   | RINT1     | chr7       | ENSG00000135249 | Missense      | c.958C>T                |
| 1802   | RIPOR2    | chr6       | ENSG00000111913 | Missense      | c.2009C>T               |
| 1803   | RMC1      | chr18      | ENSG00000141452 | Missense      | c.348C>G                |
| 1804   | RMDN1     | chr8       | ENSG00000176623 | 3'UTR         | c.*219C>G               |
| 1805   | RMDN1     | chr8       | ENSG00000176623 | Missense      | c.677G>C                |
| 1806   | RNASEH2C  | chr11      | ENSG00000172922 | 3'UTR         | c.*1414G>A              |
| 1807   | RND1      | chr12      | ENSG00000172602 | 3'UTR         | c.*780C>A               |
| 1808   | RNF103    | chr2       | ENSG00000239305 | Missense      | c.1450G>A               |
| 1809   | RNF14     | chr5       | ENSG00000135561 | 3'UTR         | c.*2291C>G              |
| 1810   | RNF152    | chr18      | ENSG00000176641 | 3'UTR         | c.*2897C>G              |
| 1811   | RNF157    | chr17      | ENSG00000141576 | 3'UTR         | c.*554G>A               |
| 1812   | RNF157    | chr17      | ENSG00000141576 | Intron        | c.673-31C>A             |
| 1813   | RNF168    | chr3       | ENSG00000163961 | 3'UTR         | c.*219G>A               |
| 1814   | RNF182    | chr6       | ENSG00000180537 | Nonsense      | c.19G>T                 |
| 1815   | RNF217    | chr6       | ENSG00000146373 | 5'UTR         | c.-67G>C                |
| 1816   | RNF217    | chr6       | ENSG00000146373 | Intron        | c.6+107G>A              |
| 1817   | RNF32     | chr7       | ENSG00000105982 | Intron        | c.450+88G>A             |
| 1818   | RNF38     | chr9       | ENSG00000137075 | 3'UTR         | c.*1368G>C              |
| 1819   | RNF40     | chr16      | ENSG00000103549 | Silent        | c.474C>T                |
| 1820   | RNF41     | chr12      | ENSG00000181852 | 3'UTR         | c.*1003C>G              |
| 1821   | RNF7      | chr3       | ENSG00000114125 | 3'UTR         | c.*98C>T                |
| 1822   | ROCK2     | chr2       | ENSG00000134318 | Splice site   | c.2550-1G>A             |
| 1823   | ROCK2     | chr2       | ENSG00000134318 | Nonsense      | c.1327C>T               |
| 1824   | ROCK2     | chr2       | ENSG00000134318 | 5'UTR         | c.-332C>T               |
| 1825   | ROPN1     | chr3       | ENSG00000065371 | Missense      | c.167C>G                |
| 1826   | RP1       | chr8       | ENSG00000104237 | Missense      | c.2136G>A               |
| 1827   | RPAP2     | chr1       | ENSG00000122484 | Missense      | c.1834G>C               |
| 1828   | RPGR      | chrX       | ENSG00000156313 | Intron        | c.1060-30G>C            |
| 1829   | RPL10     | chrX       | ENSG00000147403 | 3'UTR         | c.*730T>C               |
| 1830   | RPL19     | chr17      | ENSG00000108298 | Silent        | c.342G>A                |
| 1831   | RPL22     | chr1       | ENSG00000116251 | 5'UTR         | c.-228C>T               |
| 1832   | RPL24     | chr3       | ENSG00000114391 | 5'Flank       |                         |
| 1833   | RPL9      | chr4       | ENSG00000163682 | Missense      | c.31G>C                 |
| 1834   | RPN2      | chr20      | ENSG00000118705 | Intron        | c.480-13C>G             |
| 1835   | RPS19BP1  | chr22      | ENSG00000187051 | Silent        | c.84G>T                 |
| 1836   | RPS19BP1  | chr22      | ENSG00000187051 | Missense      | c.49G>C                 |
| 1837   | RPS23     | chr5       | ENSG00000186468 | 3'UTR         | c.*1944C>T              |
| 1838   | RPS6KB1   | chr17      | ENSG00000108443 | 3'UTR         | c.*2579C>G              |
| 1839   | RPS6KC1   | chr1       | ENSG00000136643 | Missense      | c.2020G>C               |
| 1840   | RRBP1     | chr20      | ENSG00000125844 | Missense      | c.219G>C                |
| 1841   | RRM2B     | chr8       | ENSG00000048392 | 3'UTR         | c.*1630C>G              |
| 1842   | RSPH1     | chr21      | ENSG00000160188 | Nonsense      | c.829G>T                |
| 1843   | RSPH10B2  | chr7       | ENSG00000169402 | 5'Flank       |                         |
| 1844   | RSPH9     | chr6       | ENSG00000172426 | Splice region | c.626-3C>A              |
| 1845   | RSRC1     | chr3       | ENSG00000174891 | Intron        | c.583+76G>A             |
| 1846   | RSRC2     | chr12      | ENSG00000111011 | Intron        | c.725+12 725+15del      |
| 1847   | RTCB      | chr22      | ENSG00000100220 | 3'UTR         | c.*252G>A               |
| 1848   | RTKN2     | chr10      | ENSG00000182010 | 3'UTR         | c.*236T>C               |
| 1849   | RTN2      | chr19      | ENSG00000125744 | Missense      | c.1447C>G               |
| 1850   | RTN4      | chr2       | ENSG00000115310 | Silent        | c.330G>C                |
| 1851   | RUFY1     | chr5       | ENSG00000176783 | Missense      | c.1126G>A               |
| 1852   | RUFY1     | chr5       | ENSG00000176783 | Splice region | c.1128+3G>A             |
| 1853   | RUFY2     | chr10      | ENSG00000204130 | Missense      | c.520C>G                |

| Number | Gene name | Chromosome | Gene_ID         | Mutation      | Nucleotide substitution |
|--------|-----------|------------|-----------------|---------------|-------------------------|
| 1854   | RUNX1T1   | chr8       | ENSG00000079102 | Silent        | c.1737G>A               |
| 1855   | RUSC1     | chr1       | ENSG00000160753 | Missense      | c.1309G>A               |
| 1856   | RWDD2A    | chr6       | ENSG00000013392 | 5'UTR         | c.-75G>C                |
| 1857   | RYR1      | chr19      | ENSG00000196218 | Intron        | c.2360+34C>T            |
| 1858   | RYR2      | chr1       | ENSG00000198626 | Intron        | c.416-21C>A             |
| 1859   | RYR3      | chr15      | ENSG00000198838 | Missense      | c.11092G>C              |
| 1860   | S100A1    | chr1       | ENSG00000160678 | 5'UTR         | c.-87G>C                |
| 1861   | S100A7A   | chr1       | ENSG00000184330 | 3'UTR         | c.*1517T>C              |
| 1862   | S1PR3     | chr9       | ENSG00000213694 | 5'UTR         | c.-3651C>T              |
| 1863   | SAFB2     | chr19      | ENSG00000130254 | Intron        | c.1920-52C>G            |
| 1864   | SAG       | chr2       | ENSG00000130561 | Silent        | c.621G>T                |
| 1865   | SAT1      | chrX       | ENSG00000130066 | Missense      | c.232G>C                |
| 1866   | SATB2     | chr2       | ENSG00000119042 | 3'UTR         | c.*2230C>T              |
| 1867   | SBF2      | chr11      | ENSG00000133812 | Missense      | c.2959G>C               |
| 1868   | SBK1      | chr16      | ENSG00000188322 | 3'UTR         | c.*827G>C               |
| 1869   | SBK2      | chr19      | ENSG00000187550 | Missense      | c.49G>C                 |
| 1870   | SBNO1     | chr12      | ENSG00000139697 | Intron        | c.3218-16G>C            |
| 1871   | SBNO1     | chr12      | ENSG00000139697 | Missense      | c.2853G>C               |
| 1872   | SBSPO1    | chr8       | ENSG00000164764 | Missense      | c.115C>T                |
| 1873   | SCAMP2    | chr15      | ENSG00000140497 | Intron        | c.472+13C>G             |
| 1874   | SCAND1    | chr20      | ENSG00000171222 | 3'Flank       |                         |
| 1875   | SCAPER    | chr15      | ENSG00000140386 | 5'UTR         | c.-2G>C                 |
| 1876   | SCGB1A1   | chr11      | ENSG00000149021 | Missense      | c.82C>G                 |
| 1877   | SCLY      | chr2       | ENSG00000132330 | 5'UTR         | c.-90C>T                |
| 1878   | SCML1     | chrX       | ENSG00000047634 | Silent        | c.525C>A                |
| 1879   | SCN3B     | chr11      | ENSG00000166257 | 3'UTR         | c.*1899dup              |
| 1880   | SCNN1B    | chr16      | ENSG00000168447 | Splice region | c.128-6C>T              |
| 1881   | SCNN1G    | chr16      | ENSG00000166828 | Missense      | c.1042G>A               |
| 1882   | SCP2D1    | chr20      | ENSG00000132631 | 3'UTR         | c.*30C>G                |
| 1883   | SCUBE2    | chr11      | ENSG00000175356 | Intron        | c.968-64C>A             |
| 1884   | SCYL2     | chr12      | ENSG00000136021 | 3'UTR         | c.*191G>A               |
| 1885   | SDK1      | chr7       | ENSG00000146555 | Silent        | c.4980G>A               |
| 1886   | SDK2      | chr17      | ENSG00000069188 | Splice site   | c.1000+1G>C             |
| 1887   | SEC14L2   | chr22      | ENSG00000100003 | Missense      | c.128G>A                |
| 1888   | SEC14L2   | chr22      | ENSG00000100003 | Missense      | c.339C>G                |
| 1889   | SEC16A    | chr9       | ENSG00000148396 | Intron        | c.846+49C>A             |
| 1890   | SEC16B    | chr1       | ENSG00000120341 | Splice site   | c.998+1G>C              |
| 1891   | SEC23B    | chr20      | ENSG00000101310 | Missense      | c.135G>C                |
| 1892   | SEC24A    | chr5       | ENSG00000113615 | Missense      | c.668C>G                |
| 1893   | SEC63     | chr6       | ENSG00000025796 | 3'UTR         | c.*3659G>C              |
| 1894   | SEM1      | chr7       | ENSG00000127922 | 3'UTR         | c.*299C>G               |
| 1895   | SEMA4D    | chr9       | ENSG00000187764 | Missense      | c.1897C>T               |
| 1896   | SEMA6A    | chr5       | ENSG00000092421 | 5'UTR         | c.-501G>A               |
| 1897   | SENP2     | chr3       | ENSG00000163904 | 3'UTR         | c.*1573C>A              |
| 1898   | SENP2     | chr3       | ENSG00000163904 | 3'UTR         | c.*3113C>G              |
| 1899   | SEPTIN10  | chr2       | ENSG00000186522 | 5'UTR         | c.-18G>C                |
| 1900   | SERF2     | chr15      | ENSG00000140264 | 5'UTR         | c.-60C>G                |
| 1901   | SERHL2    | chr22      | ENSG00000183569 | Missense      | c.695C>T                |
| 1902   | SERINC2   | chr1       | ENSG00000168528 | Intron        | c.39+72C>G              |
| 1903   | SERPINB13 | chr18      | ENSG00000197641 | 3'UTR         | c.*1806C>G              |
| 1904   | SERPINB6  | chr6       | ENSG00000124570 | Intron        | c.-10-226C>T            |
| 1905   | SERPINB7  | chr18      | ENSG00000166396 | Intron        | c.455-18C>T             |
| 1906   | SERPINB9  | chr6       | ENSG00000170542 | Intron        | c.168+430C>G            |

| Number | Gene name | Chromosome | Gene_ID         | Mutation      | Nucleotide substitution |
|--------|-----------|------------|-----------------|---------------|-------------------------|
| 1907   | SESN3     | chr11      | ENSG00000149212 | Missense      | c.602G>C                |
| 1908   | SETD1A    | chr16      | ENSG00000099381 | Missense      | c.2950G>A               |
| 1909   | SETD1A    | chr16      | ENSG00000099381 | Missense      | c.2959G>A               |
| 1910   | SETD6     | chr16      | ENSG00000103037 | Missense      | c.173C>G                |
| 1911   | SETX      | chr9       | ENSG00000107290 | 3'UTR         | c.*693C>A               |
| 1912   | SF3A2     | chr19      | ENSG00000104897 | Intron        | c.547-21C>T             |
| 1913   | SF3B3     | chr16      | ENSG00000189091 | Missense      | c.3573G>C               |
| 1914   | SFXN5     | chr2       | ENSG00000144040 | Intron        | c.742-65G>C             |
| 1915   | SGCE      | chr7       | ENSG00000127990 | Nonstop       | c.1448G>C               |
| 1916   | SH2D4A    | chr8       | ENSG00000104611 | Missense      | c.103C>G                |
| 1917   | SH3BGR    | chr21      | ENSG00000185437 | Nonstop       | c.164G>C                |
| 1918   | SH3BP4    | chr2       | ENSG00000130147 | Missense      | c.2099A>C               |
| 1919   | SH3BP5    | chr3       | ENSG00000131370 | Splice region | c.890-4T>G              |
| 1920   | SH3D19    | chr4       | ENSG00000109686 | Nonstop       | c.2373G>C               |
| 1921   | SH3D19    | chr4       | ENSG00000109686 | Missense      | c.667G>A                |
| 1922   | SHANK2    | chr11      | ENSG00000162105 | 3'UTR         | c.*2450G>A              |
| 1923   | SHANK2    | chr11      | ENSG00000162105 | Missense      | c.2095G>T               |
| 1924   | SHANK2    | chr11      | ENSG00000162105 | Missense      | c.319G>A                |
| 1925   | SHC4      | chr15      | ENSG00000185634 | 3'UTR         | c.*1556dup              |
| 1926   | SHE       | chr1       | ENSG00000169291 | 3'UTR         | c.*2381G>C              |
| 1927   | SHOC1     | chr9       | ENSG00000165181 | Missense      | c.3314C>T               |
| 1928   | SHOX      | chrX       | ENSG00000185960 | 3'UTR         | c.*527G>A               |
| 1929   | SHOX2     | chr3       | ENSG00000168779 | Missense      | c.781C>T                |
| 1930   | SHPK      | chr17      | ENSG00000197417 | Missense      | c.240G>T                |
| 1931   | SHPRH     | chr6       | ENSG00000146414 | 3'UTR         | c.*1687G>A              |
| 1932   | SHROOM2   | chrX       | ENSG00000146950 | Intron        | c.2891+29G>A            |
| 1933   | SIGLEC10  | chr19      | ENSG00000142512 | 5'Flank       |                         |
| 1934   | SIN3A     | chr15      | ENSG00000169375 | Missense      | c.259C>T                |
| 1935   | SIPA1     | chr11      | ENSG00000213445 | Intron        | c.2526-24C>T            |
| 1936   | SIPA1L3   | chr19      | ENSG00000105738 | Missense      | c.3431C>T               |
| 1937   | SIPA1L3   | chr19      | ENSG00000105738 | Missense      | c.3806C>A               |
| 1938   | SIX4      | chr14      | ENSG00000100625 | 3'UTR         | c.*502C>T               |
| 1939   | SIX6      | chr14      | ENSG00000184302 | 3'UTR         | c.*81G>C                |
| 1940   | SKOR1     | chr15      | ENSG00000188779 | Missense      | c.694C>A                |
| 1941   | SKOR1     | chr15      | ENSG00000188779 | Nonsense      | c.2047G>T               |
| 1942   | SLAMF6    | chr1       | ENSG00000162739 | 3'UTR         | c.*280G>C               |
| 1943   | SLC10A5   | chr8       | ENSG00000253598 | 3'Flank       |                         |
| 1944   | SLC11A2   | chr12      | ENSG00000110911 | Missense      | c.1660G>A               |
| 1945   | SLC12A2   | chr5       | ENSG00000064651 | 3'UTR         | c.*2520C>A              |
| 1946   | SLC12A3   | chr16      | ENSG00000070915 | Silent        | c.2757G>C               |
| 1947   | SLC13A3   | chr20      | ENSG00000158296 | 3'UTR         | c.*1968C>G              |
| 1948   | SLC13A3   | chr20      | ENSG00000158296 | 3'UTR         | c.*649G>A               |
| 1949   | SLC13A4   | chr7       | ENSG00000164707 | Intron        | c.711+75G>C             |
| 1950   | SLC15A2   | chr3       | ENSG00000163406 | Intron        | c.604+44G>A             |
| 1951   | SLC1A4    | chr2       | ENSG00000115902 | 3'UTR         | c.*2518C>G              |
| 1952   | SLC1A6    | chr19      | ENSG00000105143 | Silent        | c.1266C>A               |
| 1953   | SLC22A2   | chr6       | ENSG00000112499 | Silent        | c.1188C>T               |
| 1954   | SLC22A2   | chr6       | ENSG00000112499 | Intron        | c.455+48G>C             |
| 1955   | SLC23A2   | chr20      | ENSG00000089057 | 3'UTR         | c.*955G>A               |
| 1956   | SLC24A1   | chr15      | ENSG00000074621 | 3'UTR         | c.*969C>G               |
| 1957   | SLC25A52  | chr18      | ENSG00000141437 | 3'UTR         | c.*8C>A                 |
| 1958   | SLC26A10  | chr12      | ENSG00000135502 | Missense      | c.768G>C                |
| 1959   | SLC26A6   | chr3       | ENSG00000225697 | Splice region | c.1208+3G>A             |

| Number | Gene name | Chromosome | Gene_ID         | Mutation        | Nucleotide substitution |
|--------|-----------|------------|-----------------|-----------------|-------------------------|
| 1960   | SLC26A9   | chr1       | ENSG00000174502 | 3'UTR           | c.*915C>G               |
| 1961   | SLC27A4   | chr9       | ENSG00000167114 | 3'UTR           | c.*620C>G               |
| 1962   | SLC27A6   | chr5       | ENSG00000113396 | Missense        | c.1692G>T               |
| 1963   | SLC27A6   | chr5       | ENSG00000113396 | Missense        | c.1694A>G               |
| 1964   | SLC28A1   | chr15      | ENSG00000156222 | Silent          | c.334C>T                |
| 1965   | SLC29A4   | chr7       | ENSG00000164638 | 3'UTR           | c.*162G>T               |
| 1966   | SLC2A2    | chr3       | ENSG00000163581 | 3'UTR           | c.*1500A>C              |
| 1967   | SLC2A6    | chr9       | ENSG00000160326 | Intron          | c.1036+358G>C           |
| 1968   | SLC30A1   | chr1       | ENSG00000170385 | 3'UTR           | c.*591G>A               |
| 1969   | SLC30A3   | chr2       | ENSG00000115194 | Intron          | c.95+25C>G              |
| 1970   | SLC30A8   | chr8       | ENSG00000164756 | Missense        | c.595G>A                |
| 1971   | SLC34A3   | chr9       | ENSG00000198569 | Intron          | c.847-33G>A             |
| 1972   | SLC35A5   | chr3       | ENSG00000138459 | 3'UTR           | c.*527G>C               |
| 1973   | SLC35D1   | chr1       | ENSG00000116704 | 3'UTR           | c.*3399A>G              |
| 1974   | SLC35D2   | chr9       | ENSG00000130958 | Intron          | c.752+113C>T            |
| 1975   | SLC35G6   | chr17      | ENSG00000259224 | Missense        | c.38C>G                 |
| 1976   | SLC35G6   | chr17      | ENSG00000259224 | 3'UTR           | c.*119C>T               |
| 1977   | SLC35G6   | chr17      | ENSG00000259224 | 3'UTR           | c.*303C>T               |
| 1978   | SLC37A1   | chr21      | ENSG00000160190 | Intron          | c.-301+238C>G           |
| 1979   | SLC37A1   | chr21      | ENSG00000160190 | Intron          | c.564-19C>T             |
| 1980   | SLC37A1   | chr21      | ENSG00000160190 | Intron          | c.731-21C>G             |
| 1981   | SLC37A1   | chr21      | ENSG00000160190 | Intron          | c.1135+101C>G           |
| 1982   | SLC37A1   | chr21      | ENSG00000160190 | Intron          | c.1587-22C>G            |
| 1983   | SLC37A3   | chr7       | ENSG00000157800 | Intron          | c.1174+61G>A            |
| 1984   | SLC38A4   | chr12      | ENSG00000139209 | 3'UTR           | c.*1064G>A              |
| 1985   | SLC39A14  | chr8       | ENSG00000104635 | Intron          | c.1148-17C>T            |
| 1986   | SLC43A3   | chr11      | ENSG00000134802 | Silent          | c.423C>G                |
| 1987   | SLC44A3   | chr1       | ENSG00000143036 | Intron          | c.27+25C>T              |
| 1988   | SLC45A3   | chr1       | ENSG00000158715 | Missense        | c.275T>C                |
| 1989   | SLC46A1   | chr17      | ENSG00000076351 | Missense        | c.507C>A                |
| 1990   | SLC4A8    | chr12      | ENSG00000050438 | Nonsense        | c.46C>T                 |
| 1991   | SLC5A11   | chr16      | ENSG00000158865 | Intron          | c.135+24G>T             |
| 1992   | SLC5A5    | chr19      | ENSG00000105641 | Intron          | c.423+12C>T             |
| 1993   | SLC66A3   | chr2       | ENSG00000162976 | Splice region   | c.226+4A>C              |
| 1994   | SLC6A15   | chr12      | ENSG00000072041 | Nonsense        | c.1246G>T               |
| 1995   | SLC7A11   | chr4       | ENSG00000151012 | 5'Flank         |                         |
| 1996   | SLC7A5    | chr16      | ENSG00000103257 | 3'UTR           | c.*956C>T               |
| 1997   | SLC7A7    | chr14      | ENSG00000155465 | Intron          | c.-180-1830C>G          |
| 1998   | SLC8A2    | chr19      | ENSG00000118160 | Missense        | c.817G>C                |
| 1999   | SLC9A2    | chr2       | ENSG00000115616 | 3'UTR           | c.*2526C>G              |
| 2000   | SLCO1B1   | chr12      | ENSG00000134538 | Missense        | c.1643C>T               |
| 2001   | SLCO2A1   | chr3       | ENSG00000174640 | Missense        | c.1671C>G               |
| 2002   | SLCO5A1   | chr8       | ENSG00000137571 | Missense        | c.2054C>T               |
| 2003   | SLF1      | chr5       | ENSG00000133302 | Frame Shift Del | c.2929del               |
| 2004   | SLFN11    | chr17      | ENSG00000172716 | Missense        | c.1747G>C               |
| 2005   | SLFN14    | chr17      | ENSG00000236320 | Missense        | c.2230G>C               |
| 2006   | SLFNL1    | chr1       | ENSG00000171790 | 5'UTR           | c.-470C>G               |
| 2007   | SLITRK2   | chrX       | ENSG00000185985 | 3'UTR           | c.*3591C>T              |
| 2008   | SMAD3     | chr15      | ENSG00000166949 | 3'UTR           | c.*261A>C               |
| 2009   | SMAD4     | chr18      | ENSG00000141646 | Nonsense        | c.670C>T                |
| 2010   | SMARCAL1  | chr2       | ENSG00000138375 | Missense        | c.2002C>T               |
| 2011   | SMARCAL1  | chr2       | ENSG00000138375 | Missense        | c.2714C>G               |
| 2012   | SMARCD3   | chr7       | ENSG00000082014 | 5'UTR           | c.-25C>T                |

| Number | Gene name | Chromosome | Gene_ID         | Mutation      | Nucleotide substitution |
|--------|-----------|------------|-----------------|---------------|-------------------------|
| 2013   | SMC2      | chr9       | ENSG00000136824 | Missense      | c.1505G>C               |
| 2014   | SMC5      | chr9       | ENSG00000198887 | 3'UTR         | c.*2246G>A              |
| 2015   | SMCHD1    | chr18      | ENSG00000101596 | Intron        | c.1956+39G>A            |
| 2016   | SMCO1     | chr3       | ENSG00000214097 | Missense      | c.397G>C                |
| 2017   | SMG1      | chr16      | ENSG00000157106 | Missense      | c.8357C>T               |
| 2018   | SMG7      | chr1       | ENSG00000116698 | Missense      | c.3321G>C               |
| 2019   | SMIM33    | chr5       | ENSG00000283288 | Silent        | c.273C>T                |
| 2020   | SNAP25    | chr20      | ENSG00000132639 | 3'UTR         | c.*307C>A               |
| 2021   | SNCG      | chr10      | ENSG00000173267 | 5'UTR         | c.-38C>G                |
| 2022   | SNRNP200  | chr2       | ENSG00000144028 | Missense      | c.2276C>T               |
| 2023   | SNW1      | chr14      | ENSG00000100603 | Silent        | c.828G>A                |
| 2024   | SNX20     | chr16      | ENSG00000167208 | 3'UTR         | c.*2093C>T              |
| 2025   | SNX21     | chr20      | ENSG00000124104 | Missense      | c.151G>A                |
| 2026   | SNX24     | chr5       | ENSG00000064652 | Intron        | c.144+90G>C             |
| 2027   | SNX32     | chr11      | ENSG00000172803 | Missense      | c.1135G>C               |
| 2028   | SNX4      | chr3       | ENSG00000114520 | 3'UTR         | c.*1046G>C              |
| 2029   | SNX4      | chr3       | ENSG00000114520 | 5'Flank       |                         |
| 2030   | SOAT1     | chr1       | ENSG00000057252 | Intron        | c.330-29T>A             |
| 2031   | SOAT1     | chr1       | ENSG00000057252 | Splice region | c.330-3C>G              |
| 2032   | SORBS2    | chr4       | ENSG00000154556 | 3'UTR         | c.*1188G>C              |
| 2033   | SORD      | chr15      | ENSG00000140263 | Missense      | c.517G>C                |
| 2034   | SOS1      | chr2       | ENSG00000115904 | Missense      | c.2671G>C               |
| 2035   | SOX1      | chr13      | ENSG00000182968 | 3'UTR         | c.*1864C>T              |
| 2036   | SP100     | chr2       | ENSG00000067066 | 3'UTR         | c.*293T>G               |
| 2037   | SP3       | chr2       | ENSG00000172845 | 3'UTR         | c.*2562C>G              |
| 2038   | SP6       | chr17      | ENSG00000189120 | 3'UTR         | c.*23C>T                |
| 2039   | SPACA1    | chr6       | ENSG00000118434 | 5'Flank       |                         |
| 2040   | SPATA2    | chr20      | ENSG00000158480 | 3'UTR         | c.*1317C>G              |
| 2041   | SPATA2L   | chr16      | ENSG00000158792 | Missense      | c.958G>C                |
| 2042   | SPATA2L   | chr16      | ENSG00000158792 | Missense      | c.700G>A                |
| 2043   | SPATA31C1 | chr9       | ENSG00000230246 | RNA           | n.768C>T                |
| 2044   | SPATA31C1 | chr9       | ENSG00000230246 | 3'Flank       |                         |
| 2045   | SPATA5    | chr4       | ENSG00000145375 | Missense      | c.1415G>C               |
| 2046   | SPATA6    | chr1       | ENSG00000132122 | 3'UTR         | c.*2573C>G              |
| 2047   | SPATS1    | chr6       | ENSG00000249481 | Splice region | c.288-4C>G              |
| 2048   | SPCS3     | chr4       | ENSG00000129128 | 3'UTR         | c.*1251G>C              |
| 2049   | SPDYC     | chr11      | ENSG00000204710 | 3'UTR         | c.*14G>A                |
| 2050   | SPECC1L   | chr22      | ENSG00000100014 | Missense      | c.1300G>A               |
| 2051   | SPEG      | chr2       | ENSG00000072195 | Intron        | c.7859-61G>A            |
| 2052   | SPG11     | chr15      | ENSG00000104133 | Missense      | c.7294C>G               |
| 2053   | SPG7      | chr16      | ENSG00000197912 | Silent        | c.1152G>C               |
| 2054   | SPG7      | chr16      | ENSG00000197912 | 3'UTR         | c.*140G>C               |
| 2055   | SPICE1    | chr3       | ENSG00000163611 | Splice region | c.385+6C>G              |
| 2056   | SPIDR     | chr8       | ENSG00000164808 | Intron        | c.1098-3765C>A          |
| 2057   | SPINK14   | chr5       | ENSG00000196800 | Intron        | c.111+111C>G            |
| 2058   | SPINK5    | chr5       | ENSG00000133710 | Splice region | c.282+3G>T              |
| 2059   | SPO11     | chr20      | ENSG00000054796 | Intron        | c.846-10T>G             |
| 2060   | SPRY4     | chr5       | ENSG00000187678 | 3'UTR         | c.*3371G>C              |
| 2061   | SPRYD3    | chr12      | ENSG00000167778 | Missense      | c.483C>G                |
| 2062   | SPSB4     | chr3       | ENSG00000175093 | Splice region | c.694+4A>C              |
| 2063   | SPTBN1    | chr2       | ENSG00000115306 | Missense      | c.1909G>C               |
| 2064   | SPTBN2    | chr11      | ENSG00000173898 | Intron        | c.2816+31G>A            |
| 2065   | SPTBN4    | chr19      | ENSG00000160460 | Intron        | c.5916-63C>A            |

| Number | Gene name | Chromosome | Gene_ID         | Mutation            | Nucleotide substitution |
|--------|-----------|------------|-----------------|---------------------|-------------------------|
| 2066   | SPTSSA    | chr14      | ENSG00000165389 | Missense            | c.95G>C                 |
| 2067   | SRA1      | chr5       | ENSG00000213523 | Missense            | c.545C>A                |
| 2068   | SRCAP     | chr16      | ENSG00000080603 | Intron              | c.3707-42G>C            |
| 2069   | SRCAP     | chr16      | ENSG00000080603 | Silent              | c.9594G>A               |
| 2070   | SRGAP3    | chr3       | ENSG00000196220 | 3'UTR               | c.*450G>C               |
| 2071   | SRPK1     | chr6       | ENSG00000096063 | 3'UTR               | c.*1267G>C              |
| 2072   | SRPK1     | chr6       | ENSG00000096063 | 3'UTR               | c.*1230G>A              |
| 2073   | SRPK1     | chr6       | ENSG00000096063 | 3'UTR               | c.*1037G>C              |
| 2074   | SRPK1     | chr6       | ENSG00000096063 | 3'UTR               | c.*643G>C               |
| 2075   | SRPK1     | chr6       | ENSG00000096063 | 3'UTR               | c.*409G>T               |
| 2076   | SRPK1     | chr6       | ENSG00000096063 | Missense            | c.1963G>C               |
| 2077   | SRRD      | chr22      | ENSG00000100104 | 3'UTR               | c.*2453G>A              |
| 2078   | SRSF2     | chr17      | ENSG00000161547 | 3'UTR               | c.*410G>C               |
| 2079   | SRSF2     | chr17      | ENSG00000161547 | Translation Start S | c.3G>C                  |
| 2080   | SRSF3     | chr6       | ENSG00000112081 | 3'UTR               | c.*1044G>A              |
| 2081   | SSBP2     | chr5       | ENSG00000145687 | Intron              | c.958-52G>C             |
| 2082   | SSH2      | chr17      | ENSG00000141298 | 3'UTR               | c.*724G>C               |
| 2083   | SSPO      | chr7       | ENSG00000197558 | Missense            | c.2170G>C               |
| 2084   | ST3GAL5   | chr2       | ENSG00000115525 | Intron              | c.319-4991G>A           |
| 2085   | ST3GAL5   | chr2       | ENSG00000115525 | Intron              | c.319-5018G>A           |
| 2086   | STAC2     | chr17      | ENSG00000141750 | 3'UTR               | c.*299G>C               |
| 2087   | STAC2     | chr17      | ENSG00000141750 | Intron              | c.941+55G>C             |
| 2088   | STAC2     | chr17      | ENSG00000141750 | Silent              | c.519C>T                |
| 2089   | STARD9    | chr15      | ENSG00000159433 | Missense            | c.8000C>G               |
| 2090   | STAT5A    | chr17      | ENSG00000126561 | Missense            | c.1984G>A               |
| 2091   | STIMATE   | chr3       | ENSG00000213533 | Intron              | c.619-46G>C             |
| 2092   | STK33     | chr11      | ENSG00000130413 | Splice region       | c.559-3C>G              |
| 2093   | STK38L    | chr12      | ENSG00000211455 | 3'UTR               | c.*997C>T               |
| 2094   | STK4      | chr20      | ENSG00000101109 | 3'UTR               | c.*4624G>A              |
| 2095   | STOX1     | chr10      | ENSG00000165730 | Missense            | c.1726G>A               |
| 2096   | STRADA    | chr17      | ENSG00000266173 | Intron              | c.580-72C>G             |
| 2097   | STX12     | chr1       | ENSG00000117758 | Silent              | c.36G>A                 |
| 2098   | STX16     | chr20      | ENSG00000124222 | Intron              | c.398-9C>T              |
| 2099   | STXBP5    | chr6       | ENSG00000164506 | Missense            | c.530C>T                |
| 2100   | STXBP6    | chr14      | ENSG00000168952 | Nonstop             | c.632G>C                |
| 2101   | SUB1      | chr5       | ENSG00000113387 | 3'UTR               | c.*2915C>T              |
| 2102   | SUCO      | chr1       | ENSG00000094975 | Missense            | c.2364G>C               |
| 2103   | SUCO      | chr1       | ENSG00000094975 | Nonsense            | c.2383G>T               |
| 2104   | SULT6B1   | chr2       | ENSG00000138068 | Missense            | c.736G>C                |
| 2105   | SULT6B1   | chr2       | ENSG00000138068 | Intron              | c.288+12T>C             |
| 2106   | SUPT20HL1 | chrX       | ENSG00000223731 | RNA                 | n.45C>T                 |
| 2107   | SUSD1     | chr9       | ENSG00000106868 | 5'UTR               | c.-35G>T                |
| 2108   | SUSD4     | chr1       | ENSG00000143502 | Intron              | c.1445-9C>G             |
| 2109   | SV2B      | chr15      | ENSG00000185518 | 3'UTR               | c.*8461C>T              |
| 2110   | SVEP1     | chr9       | ENSG00000165124 | 3'UTR               | c.*1131G>A              |
| 2111   | SVOPL     | chr7       | ENSG00000157703 | Intron              | c.83-32G>T              |
| 2112   | SYDE2     | chr1       | ENSG00000097096 | Nonsense            | c.2542C>T               |
| 2113   | SYN1      | chrX       | ENSG00000008056 | Silent              | c.156G>A                |
| 2114   | SYN2      | chr3       | ENSG00000157152 | Intron              | c.981-13G>A             |
| 2115   | SYNE3     | chr14      | ENSG00000176438 | 5'UTR               | c.-323G>C               |
| 2116   | SYNJ1     | chr21      | ENSG00000159082 | Intron              | c.1511-28C>G            |
| 2117   | SYNJ2     | chr6       | ENSG00000078269 | 3'UTR               | c.*2621G>C              |
| 2118   | SYNPO2    | chr4       | ENSG00000172403 | Intron              | c.12+37819C>G           |



| Number | Gene name | Chromosome | Gene_ID         | Mutation | Nucleotide substitution |
|--------|-----------|------------|-----------------|----------|-------------------------|
| 2119   | SYT1      | chr12      | ENSG00000067715 | Missense | c.966G>C                |
| 2120   | SYT14     | chr1       | ENSG00000143469 | 3'UTR    | c.*2400G>C              |
| 2121   | SYTL4     | chrX       | ENSG00000102362 | Missense | c.1702C>G               |
| 2122   | SYVN1     | chr11      | ENSG00000162298 | Missense | c.377T>C                |
| 2123   | SZT2      | chr1       | ENSG00000198198 | Missense | c.2731G>A               |
| 2124   | TACR3     | chr4       | ENSG00000169836 | 3'UTR    | c.*31A>G                |
| 2125   | TAGLN     | chr11      | ENSG00000149591 | 5'UTR    | c.-820G>C               |
| 2126   | TAGLN3    | chr3       | ENSG00000144834 | Silent   | c.72G>A                 |
| 2127   | TAL1      | chr1       | ENSG00000162367 | 3'UTR    | c.*892G>A               |
| 2128   | TALDO1    | chr11      | ENSG00000177156 | Intron   | c.637+17G>A             |
| 2129   | TAOK1     | chr17      | ENSG00000160551 | Intron   | c.2362-19C>T            |
| 2130   | TARBP1    | chr1       | ENSG00000059588 | Nonsense | c.2374C>T               |
| 2131   | TARS2     | chr1       | ENSG00000143374 | Intron   | c.1149+72C>G            |
| 2132   | TAX1BP1   | chr7       | ENSG00000106052 | Missense | c.2170C>G               |
| 2133   | TBC1D1    | chr4       | ENSG00000065882 | Intron   | c.1414-41G>C            |
| 2134   | TBC1D12   | chr10      | ENSG00000108239 | 3'UTR    | c.*1185C>T              |
| 2135   | TBC1D12   | chr10      | ENSG00000108239 | 3'UTR    | c.*2673C>T              |
| 2136   | TBC1D13   | chr9       | ENSG00000107021 | Intron   | c.98-38C>G              |
| 2137   | TBC1D17   | chr19      | ENSG00000104946 | Missense | c.226G>A                |
| 2138   | TBC1D19   | chr4       | ENSG00000109680 | Missense | c.937G>C                |
| 2139   | TBC1D9B   | chr5       | ENSG00000197226 | Intron   | c.2863+42C>G            |
| 2140   | TBCD      | chr17      | ENSG00000141556 | Intron   | c.1318+13701C>T         |
| 2141   | TBK1      | chr12      | ENSG00000183735 | Nonsense | c.1043C>G               |
| 2142   | TBL1XR1   | chr3       | ENSG00000177565 | 3'UTR    | c.*3909G>C              |
| 2143   | TBL2      | chr7       | ENSG00000106638 | Intron   | c.130+1794_130+1797del  |
| 2144   | TBRG4     | chr7       | ENSG00000136270 | Intron   | c.908-99G>A             |
| 2145   | TBX2      | chr17      | ENSG00000121068 | 3'Flank  |                         |
| 2146   | TBX6      | chr16      | ENSG00000149922 | 5'UTR    | c.-581C>A               |
| 2147   | TBXA2R    | chr19      | ENSG00000006638 | Missense | c.784C>G                |
| 2148   | TBXA2R    | chr19      | ENSG00000006638 | Missense | c.620C>T                |
| 2149   | TCAP      | chr17      | ENSG00000173991 | 5'UTR    | c.-687G>C               |
| 2150   | TCAP      | chr17      | ENSG00000173991 | 3'UTR    | c.*377G>A               |
| 2151   | TCN2      | chr22      | ENSG00000185339 | Intron   | c.941-13C>A             |
| 2152   | TCP10L2   | chr6       | ENSG00000166984 | 3'Flank  |                         |
| 2153   | TCP11L1   | chr11      | ENSG00000176148 | Intron   | c.1328-14C>G            |
| 2154   | TCTN2     | chr12      | ENSG00000168778 | Intron   | c.1312+49C>T            |
| 2155   | TCTN3     | chr10      | ENSG00000119977 | Intron   | c.310+30T>C             |
| 2156   | TDRD7     | chr9       | ENSG00000196116 | Silent   | c.426G>A                |
| 2157   | TDRD7     | chr9       | ENSG00000196116 | Missense | c.3265G>A               |
| 2158   | TDRD7     | chr9       | ENSG00000196116 | 3'UTR    | c.*173G>C               |
| 2159   | TDRD7     | chr9       | ENSG00000196116 | 3'Flank  |                         |
| 2160   | TDRD9     | chr14      | ENSG00000156414 | Nonsense | c.1201G>T               |
| 2161   | TEDC1     | chr14      | ENSG00000185347 | Missense | c.69C>G                 |
| 2162   | TENM1     | chrX       | ENSG00000009694 | 3'UTR    | c.*812C>G               |
| 2163   | TENM2     | chr5       | ENSG00000145934 | Missense | c.211G>A                |
| 2164   | TEP1      | chr14      | ENSG00000129566 | Missense | c.5472C>G               |
| 2165   | TERB1     | chr16      | ENSG00000249961 | Missense | c.172G>A                |
| 2166   | TEX14     | chr17      | ENSG00000121101 | Intron   | c.4103-55G>C            |
| 2167   | TEX15     | chr8       | ENSG00000133863 | 3'UTR    | c.*754C>G               |
| 2168   | TEX15     | chr8       | ENSG00000133863 | Missense | c.7483G>A               |
| 2169   | TEX15     | chr8       | ENSG00000133863 | Missense | c.7267G>C               |
| 2170   | TEX36     | chr10      | ENSG00000175018 | Intron   | c.51+33C>G              |
| 2171   | TEX55     | chr3       | ENSG00000163424 | Missense | c.310G>A                |

| Number | Gene name    | Chromosome | Gene_ID         | Mutation      | Nucleotide substitution |
|--------|--------------|------------|-----------------|---------------|-------------------------|
| 2172   | TF           | chr3       | ENSG00000091513 | Silent        | c.1656G>A               |
| 2173   | TFAP2A       | chr6       | ENSG00000137203 | Intron        | c.34-2558G>C            |
| 2174   | TFE3         | chrX       | ENSG00000068323 | Intron        | c.885+18G>A             |
| 2175   | TFEC         | chr7       | ENSG00000105967 | 3'UTR         | c.*475C>T               |
| 2176   | TFIP11       | chr22      | ENSG00000100109 | Missense      | c.2072C>T               |
| 2177   | TFIP11       | chr22      | ENSG00000100109 | Missense      | c.1974C>G               |
| 2178   | TFPI2        | chr7       | ENSG00000105825 | 3'UTR         | c.*1084G>A              |
| 2179   | TG           | chr8       | ENSG00000042832 | Silent        | c.4965C>T               |
| 2180   | TG           | chr8       | ENSG00000042832 | 5'UTR         | c.-169G>C               |
| 2181   | TGFBR3       | chr1       | ENSG00000069702 | Missense      | c.2223G>A               |
| 2182   | TGM5         | chr15      | ENSG00000104055 | Silent        | c.1965G>A               |
| 2183   | THAP2        | chr12      | ENSG00000173451 | 3'UTR         | c.*287A>C               |
| 2184   | THBS1        | chr15      | ENSG00000137801 | 3'UTR         | c.*253G>C               |
| 2185   | THOC3        | chr5       | ENSG00000051596 | Intron        | c.154-63A>G             |
| 2186   | THOP1        | chr19      | ENSG00000172009 | Missense      | c.1918G>C               |
| 2187   | THSD7A       | chr7       | ENSG00000005108 | Nonsense      | c.1825G>T               |
| 2188   | THSD7A       | chr7       | ENSG00000005108 | Missense      | c.1450G>C               |
| 2189   | TIGD1        | chr2       | ENSG00000221944 | Silent        | c.1623C>T               |
| 2190   | TIGD3        | chr11      | ENSG00000173825 | Silent        | c.621G>A                |
| 2191   | TIGIT        | chr3       | ENSG00000181847 | 5'UTR         | c.-211G>A               |
| 2192   | TIMM17A      | chr1       | ENSG00000134375 | 5'UTR         | c.-4C>T                 |
| 2193   | TIMP3        | chr22      | ENSG00000100234 | 3'UTR         | c.*296C>G               |
| 2194   | TK1          | chr17      | ENSG00000167900 | 3'UTR         | c.*334C>G               |
| 2195   | TLCD5        | chr11      | ENSG00000181264 | 3'UTR         | c.*2782C>G              |
| 2196   | TLE1         | chr9       | ENSG00000196781 | Intron        | c.66+31G>A              |
| 2197   | TLE3         | chr15      | ENSG00000140332 | Silent        | c.1770C>T               |
| 2198   | TLE4         | chr9       | ENSG00000106829 | 3'UTR         | c.*28C>T                |
| 2199   | TLE6         | chr19      | ENSG00000104953 | Intron        | c.1538-19G>A            |
| 2200   | TLN2         | chr15      | ENSG00000171914 | Missense      | c.3436G>A               |
| 2201   | TLR3         | chr4       | ENSG00000164342 | Nonsense      | c.1447C>T               |
| 2202   | TLR8         | chrX       | ENSG00000101916 | Nonsense      | c.1367C>G               |
| 2203   | TLX1         | chr10      | ENSG00000107807 | 5'Flank       |                         |
| 2204   | TLX1         | chr10      | ENSG00000107807 | 5'Flank       |                         |
| 2205   | TM2D2        | chr8       | ENSG00000169490 | 3'UTR         | c.*1024G>C              |
| 2206   | TM2D2        | chr8       | ENSG00000169490 | 3'UTR         | c.*235C>G               |
| 2207   | TM4SF18      | chr3       | ENSG00000163762 | 3'UTR         | c.*1955C>G              |
| 2208   | TM9SF4       | chr20      | ENSG00000101337 | Intron        | c.1118+46C>T            |
| 2209   | TMC8         | chr17      | ENSG00000167895 | Missense      | c.55G>A                 |
| 2210   | MED7-TICAM   | chr5       | ENSG00000251201 | 3'UTR         | c.*506G>A               |
| 2211   | TMED8        | chr14      | ENSG00000100580 | 3'UTR         | c.*5795G>C              |
| 2212   | TMED8        | chr14      | ENSG00000100580 | 3'UTR         | c.*2085G>C              |
| 2213   | TMEFF2       | chr2       | ENSG00000144339 | Intron        | c.745+87G>A             |
| 2214   | TMEM106C     | chr12      | ENSG00000134291 | Intron        | c.-28-65G>T             |
| 2215   | TMEM131L     | chr4       | ENSG00000121210 | Intron        | c.1597+25G>A            |
| 2216   | TMEM131L     | chr4       | ENSG00000121210 | Splice region | c.2121-3C>T             |
| 2217   | TMEM140      | chr7       | ENSG00000146859 | 5'Flank       |                         |
| 2218   | TMEM151B     | chr6       | ENSG00000178233 | Intron        | c.136-446C>G            |
| 2219   | TMEM185B     | chr2       | ENSG00000226479 | Missense      | c.318G>C                |
| 2220   | TMEM185B     | chr2       | ENSG00000226479 | 5'UTR         | c.-42C>T                |
| 2221   | TMEM189-UBE2 | chr20      | ENSG00000124208 | Missense      | c.267C>G                |
| 2222   | TMEM192      | chr4       | ENSG00000170088 | Intron        | c.27+73G>A              |
| 2223   | TMEM200A     | chr6       | ENSG00000164484 | Splice site   | c.-16-1G>A              |
| 2224   | TMEM266      | chr15      | ENSG00000169758 | Missense      | c.112G>T                |

| Number | Gene name | Chromosome | Gene_ID         | Mutation      | Nucleotide substitution |
|--------|-----------|------------|-----------------|---------------|-------------------------|
| 2225   | TMEM33    | chr4       | ENSG00000109133 | Silent        | c.300C>G                |
| 2226   | TMEM39A   | chr3       | ENSG00000176142 | Missense      | c.1054C>T               |
| 2227   | TMEM44    | chr3       | ENSG00000145014 | 5'UTR         | c.-184C>T               |
| 2228   | TMEM81    | chr1       | ENSG00000174529 | Silent        | c.246G>C                |
| 2229   | TMEM87A   | chr15      | ENSG00000103978 | Intron        | c.1626+65C>A            |
| 2230   | TMOD2     | chr15      | ENSG00000128872 | 3'UTR         | c.*7480C>G              |
| 2231   | TMPRSS15  | chr21      | ENSG00000154646 | Missense      | c.597A>C                |
| 2232   | TMPRSS3   | chr21      | ENSG00000160183 | 3'UTR         | c.*871C>A               |
| 2233   | TMPRSS6   | chr22      | ENSG00000187045 | Missense      | c.1283C>T               |
| 2234   | TNC       | chr9       | ENSG00000041982 | Missense      | c.5539C>T               |
| 2235   | TNFRSF25  | chr1       | ENSG00000215788 | Missense      | c.126G>C                |
| 2236   | TNFRSF6B  | chr20      | ENSG00000243509 | Intron        | c.620-27G>C             |
| 2237   | TNPO2     | chr19      | ENSG00000105576 | 5'UTR         | c.-371C>A               |
| 2238   | TNPO3     | chr7       | ENSG00000064419 | Missense      | c.547C>G                |
| 2239   | TNRC18    | chr7       | ENSG00000182095 | Silent        | c.82C>T                 |
| 2240   | TNRC18P2  | chr7       | ENSG00000223566 | 3'Flank       |                         |
| 2241   | TNS1      | chr2       | ENSG00000079308 | Splice region | c.343-3C>A              |
| 2242   | TNS3      | chr7       | ENSG00000136205 | 3'UTR         | c.*2275T>G              |
| 2243   | TNS3      | chr7       | ENSG00000136205 | Intron        | c.3929-19C>T            |
| 2244   | TOE1      | chr1       | ENSG00000132773 | 3'UTR         | c.*50C>G                |
| 2245   | TOPBP1    | chr3       | ENSG00000163781 | 3'UTR         | c.*55G>A                |
| 2246   | TP53      | chr17      | ENSG00000141510 | Missense      | c.695T>C                |
| 2247   | TP53TG5   | chr20      | ENSG00000124251 | Missense      | c.788G>A                |
| 2248   | TPD52     | chr8       | ENSG00000076554 | 3'UTR         | c.*1803C>G              |
| 2249   | TPM3      | chr1       | ENSG00000143549 | Intron        | c.776-1371C>A           |
| 2250   | TPM3      | chr1       | ENSG00000143549 | Intron        | c.776-1385C>G           |
| 2251   | TPR       | chr1       | ENSG00000047410 | Missense      | c.4562T>G               |
| 2252   | TPR       | chr1       | ENSG00000047410 | Nonsense      | c.4558C>T               |
| 2253   | TRAF3     | chr14      | ENSG00000131323 | 3'UTR         | c.*3099C>T              |
| 2254   | TRAF3IP2  | chr6       | ENSG00000056972 | Missense      | c.739C>A                |
| 2255   | TRAF5     | chr1       | ENSG00000082512 | Missense      | c.1504G>C               |
| 2256   | TRAK2     | chr2       | ENSG00000115993 | 3'UTR         | c.*2576C>T              |
| 2257   | TRAK2     | chr2       | ENSG00000115993 | 3'UTR         | c.*2054G>A              |
| 2258   | TRAV14DV4 | chr14      | ENSG00000211792 | Intron        | c.50-56C>G              |
| 2259   | TRAV22    | chr14      | ENSG00000211802 | Nonsense      | c.305C>G                |
| 2260   | TRIM11    | chr1       | ENSG00000154370 | 5'UTR         | c.-181G>C               |
| 2261   | TRIM24    | chr7       | ENSG00000122779 | 5'UTR         | c.-182G>A               |
| 2262   | TRIM41    | chr5       | ENSG00000146063 | Silent        | c.1710G>C               |
| 2263   | TRIM46    | chr1       | ENSG00000163462 | Intron        | c.1285+149 1285+150del  |
| 2264   | TRIM6     | chr11      | ENSG00000121236 | 3'UTR         | c.*72C>G                |
| 2265   | TRIM6     | chr11      | ENSG00000121236 | 3'UTR         | c.*476G>C               |
| 2266   | TRIM66    | chr11      | ENSG00000166436 | Intron        | c.9+45C>A               |
| 2267   | TRIM67    | chr1       | ENSG00000119283 | 3'UTR         | c.*3431C>A              |
| 2268   | TRMT13    | chr1       | ENSG00000122435 | Intron        | c.232-71C>G             |
| 2269   | TRMU      | chr22      | ENSG00000100416 | Silent        | c.21C>T                 |
| 2270   | TRPC3     | chr4       | ENSG00000138741 | Nonsense      | c.421G>T                |
| 2271   | TRPM3     | chr9       | ENSG00000083067 | Intron        | c.3350+34G>T            |
| 2272   | TRPM6     | chr9       | ENSG00000119121 | 3'UTR         | c.*878C>G               |
| 2273   | TRPM7     | chr15      | ENSG00000092439 | Nonsense      | c.335C>G                |
| 2274   | TRPS1     | chr8       | ENSG00000104447 | Silent        | c.3819G>A               |
| 2275   | TRPS1     | chr8       | ENSG00000104447 | Silent        | c.1260C>T               |
| 2276   | TRRAP     | chr7       | ENSG00000196367 | Missense      | c.8359G>A               |
| 2277   | TSC1      | chr9       | ENSG00000165699 | Silent        | c.1260G>A               |

| Number | Gene name | Chromosome | Gene_ID         | Mutation      | Nucleotide substitution |
|--------|-----------|------------|-----------------|---------------|-------------------------|
| 2278   | TSC2      | chr16      | ENSG00000103197 | Missense      | c.4428G>C               |
| 2279   | TSC22D4   | chr7       | ENSG00000166925 | Missense      | c.338G>C                |
| 2280   | TSG101    | chr11      | ENSG00000074319 | 5'Flank       |                         |
| 2281   | TSGA10    | chr2       | ENSG00000135951 | Intron        | c.-485+291G>A           |
| 2282   | TSHZ2     | chr20      | ENSG00000182463 | Missense      | c.861G>C                |
| 2283   | TSHZ3     | chr19      | ENSG00000121297 | 3'UTR         | c.*1499C>G              |
| 2284   | TSNARE1   | chr8       | ENSG00000171045 | Intron        | c.1449+2984C>T          |
| 2285   | TSNARE1   | chr8       | ENSG00000171045 | Missense      | c.358C>G                |
| 2286   | TSPAN32   | chr11      | ENSG00000064201 | Intron        | c.627+46C>T             |
| 2287   | TSPAN33   | chr7       | ENSG00000158457 | 5'UTR         | c.-200C>G               |
| 2288   | TSPAN33   | chr7       | ENSG00000158457 | 3'UTR         | c.*289G>C               |
| 2289   | TSPEAR    | chr21      | ENSG00000175894 | Intron        | c.1566+2962C>T          |
| 2290   | TSPOAP1   | chr17      | ENSG00000005379 | Silent        | c.3168C>A               |
| 2291   | TSPOAP1   | chr17      | ENSG00000005379 | Missense      | c.2800G>T               |
| 2292   | TTC12     | chr11      | ENSG00000149292 | Nonsense      | c.52G>T                 |
| 2293   | TTC13     | chr1       | ENSG00000143643 | Splice region | c.983+3G>C              |
| 2294   | TTC21B    | chr2       | ENSG00000123607 | Missense      | c.1546C>A               |
| 2295   | TTC23L    | chr5       | ENSG00000205838 | Silent        | c.375G>A                |
| 2296   | TTC41P    | chr12      | ENSG00000214198 | RNA           | n.748C>G                |
| 2297   | TTC7B     | chr14      | ENSG00000165914 | Intron        | c.1967-8511G>C          |
| 2298   | TTC9      | chr14      | ENSG00000133985 | Missense      | c.565G>C                |
| 2299   | TTLL13P   | chr15      | ENSG00000213471 | Missense      | c.2100C>G               |
| 2300   | TTLL5     | chr14      | ENSG00000119685 | Intron        | c.3823+1991 3823+1992de |
| 2301   | TTN       | chr2       | ENSG00000155657 | Splice region | c.39845-3C>G            |
| 2302   | TTN       | chr2       | ENSG00000155657 | Missense      | c.34591C>G              |
| 2303   | TTN       | chr2       | ENSG00000155657 | Intron        | c.13859-10489C>G        |
| 2304   | TTN       | chr2       | ENSG00000155657 | Missense      | c.23734C>G              |
| 2305   | TTN       | chr2       | ENSG00000155657 | Silent        | c.13419C>T              |
| 2306   | TTN       | chr2       | ENSG00000155657 | Missense      | c.16684G>C              |
| 2307   | TTN       | chr2       | ENSG00000155657 | Missense      | c.10696G>C              |
| 2308   | TTN       | chr2       | ENSG00000155657 | Missense      | c.4756G>A               |
| 2309   | TUBA1B    | chr12      | ENSG00000123416 | Intron        | c.4-23G>C               |
| 2310   | TUBA4A    | chr2       | ENSG00000127824 | Splice region | c.3+5G>C                |
| 2311   | TUT1      | chr11      | ENSG00000149016 | 3'Flank       |                         |
| 2312   | TXK       | chr4       | ENSG00000074966 | Silent        | c.1425C>T               |
| 2313   | TXLNG     | chrX       | ENSG00000086712 | 3'UTR         | c.*1293G>A              |
| 2314   | TXNRD2    | chr22      | ENSG00000184470 | Intron        | c.104-2262C>T           |
| 2315   | TXNRD2    | chr22      | ENSG00000184470 | Missense      | c.92G>A                 |
| 2316   | UBAP2     | chr9       | ENSG00000137073 | Nonsense      | c.1655C>G               |
| 2317   | UBAP2L    | chr1       | ENSG00000143569 | Missense      | c.1795C>G               |
| 2318   | UBASH3A   | chr21      | ENSG00000160185 | Silent        | c.99C>T                 |
| 2319   | UBASH3A   | chr21      | ENSG00000160185 | Missense      | c.1193G>A               |
| 2320   | UBE2J1    | chr6       | ENSG00000198833 | 3'UTR         | c.*2027G>T              |
| 2321   | UBE2K     | chr4       | ENSG00000078140 | Intron        | c.63+33C>T              |
| 2322   | UBE2S     | chr19      | ENSG00000108106 | Intron        | c.3+99G>C               |
| 2323   | UBE2V2    | chr8       | ENSG00000169139 | 3'UTR         | c.*2356C>T              |
| 2324   | UBE3A     | chr15      | ENSG00000114062 | Intron        | c.-112+81C>G            |
| 2325   | UBE3C     | chr7       | ENSG00000009335 | Intron        | c.1810-35C>G            |
| 2326   | UBR1      | chr15      | ENSG00000159459 | Splice region | c.2379+7C>G             |
| 2327   | UBR3      | chr2       | ENSG00000144357 | Missense      | c.1546G>T               |
| 2328   | UBR4      | chr1       | ENSG00000127481 | Missense      | c.1912C>G               |
| 2329   | UGT2A2    | chr4       | ENSG00000271271 | Missense      | c.33G>T                 |
| 2330   | ULK3      | chr15      | ENSG00000140474 | Intron        | c.469+22G>A             |

| Number | Gene name | Chromosome | Gene_ID         | Mutation | Nucleotide substitution |
|--------|-----------|------------|-----------------|----------|-------------------------|
| 2331   | UNC50     | chr2       | ENSG00000115446 | 5'UTR    | c.-428G>C               |
| 2332   | UNC5C     | chr4       | ENSG00000182168 | 3'UTR    | c.*1281C>T              |
| 2333   | Unknown   | chr19      |                 | IGR      |                         |
| 2334   | Unknown   | chr16      |                 | IGR      |                         |
| 2335   | Unknown   | chr16      |                 | IGR      |                         |
| 2336   | Unknown   | chr19      |                 | IGR      |                         |
| 2337   | UPK1B     | chr3       | ENSG00000114638 | Intron   | c.733-10dup             |
| 2338   | UQCRFS1   | chr19      | ENSG00000169021 | Missense | c.464A>C                |
| 2339   | UROC1     | chr3       | ENSG00000159650 | Missense | c.1125C>G               |
| 2340   | USE1      | chr19      | ENSG00000053501 | 3'UTR    | c.*153G>C               |
| 2341   | USH2A     | chr1       | ENSG00000042781 | Missense | c.2509C>T               |
| 2342   | USH2A     | chr1       | ENSG00000042781 | 5'UTR    | c.-26C>G                |
| 2343   | USHBP1    | chr19      | ENSG00000130307 | Missense | c.1889C>T               |
| 2344   | USP19     | chr3       | ENSG00000172046 | Missense | c.1387A>C               |
| 2345   | USP28     | chr11      | ENSG00000048028 | Missense | c.1249G>A               |
| 2346   | USP3      | chr15      | ENSG00000140455 | Intron   | c.950-9C>G              |
| 2347   | USP31     | chr16      | ENSG00000103404 | Missense | c.1130C>A               |
| 2348   | USP34     | chr2       | ENSG00000115464 | 3'Flank  |                         |
| 2349   | USP34     | chr2       | ENSG00000115464 | Missense | c.6384G>C               |
| 2350   | USP35     | chr11      | ENSG00000118369 | Missense | c.163G>C                |
| 2351   | USP37     | chr2       | ENSG00000135913 | Missense | c.333G>A                |
| 2352   | USP39     | chr2       | ENSG00000168883 | Nonsense | c.721C>T                |
| 2353   | USP40     | chr2       | ENSG00000085982 | Intron   | c.2647+81G>C            |
| 2354   | USP46     | chr4       | ENSG00000109189 | Intron   | c.36+2856C>T            |
| 2355   | USP47     | chr11      | ENSG00000170242 | Missense | c.2641G>A               |
| 2356   | USP48     | chr1       | ENSG00000090686 | 5'UTR    | c.-258G>T               |
| 2357   | USP49     | chr6       | ENSG00000164663 | Silent   | c.1176C>T               |
| 2358   | USP51     | chrX       | ENSG00000247746 | Missense | c.38C>G                 |
| 2359   | UTP18     | chr17      | ENSG00000011260 | Silent   | c.687T>G                |
| 2360   | UTP20     | chr12      | ENSG00000120800 | Missense | c.5844G>C               |
| 2361   | UTP23     | chr8       | ENSG00000147679 | 3'UTR    | c.*1315G>C              |
| 2362   | UTP3      | chr4       | ENSG00000132467 | Nonsense | c.301G>T                |
| 2363   | UTP3      | chr4       | ENSG00000132467 | 3'UTR    | c.*176G>C               |
| 2364   | UXS1      | chr2       | ENSG00000115652 | Intron   | c.95-56G>C              |
| 2365   | UXT       | chrX       | ENSG00000126756 | Intron   | c.249-43G>A             |
| 2366   | VCL       | chr10      | ENSG00000035403 | Missense | c.755C>G                |
| 2367   | VEGFC     | chr4       | ENSG00000150630 | Missense | c.979C>A                |
| 2368   | VILL      | chr3       | ENSG00000136059 | Intron   | c.2205+68G>C            |
| 2369   | VLDLR     | chr9       | ENSG00000147852 | 5'UTR    | c.-293C>G               |
| 2370   | VLDLR     | chr9       | ENSG00000147852 | Missense | c.2468G>C               |
| 2371   | VMP1      | chr17      | ENSG00000062716 | Intron   | c.76+10G>C              |
| 2372   | VPS13A    | chr9       | ENSG00000197969 | Silent   | c.2928G>A               |
| 2373   | VPS13A    | chr9       | ENSG00000197969 | Missense | c.4834C>G               |
| 2374   | VPS13B    | chr8       | ENSG00000132549 | Missense | c.3041C>G               |
| 2375   | VPS13C    | chr15      | ENSG00000129003 | Missense | c.10585G>C              |
| 2376   | VPS13C    | chr15      | ENSG00000129003 | Missense | c.4663G>C               |
| 2377   | VPS18     | chr15      | ENSG00000104142 | Silent   | c.900G>A                |
| 2378   | VPS37D    | chr7       | ENSG00000176428 | Missense | c.268C>T                |
| 2379   | VPS45     | chr1       | ENSG00000136631 | Missense | c.992G>T                |
| 2380   | VPS50     | chr7       | ENSG00000004766 | 3'UTR    | c.*404C>T               |
| 2381   | VPS50     | chr7       | ENSG00000004766 | Silent   | c.2088C>G               |
| 2382   | VPS51     | chr11      | ENSG00000149823 | Intron   | c.61+84G>C              |
| 2383   | VPS72     | chr1       | ENSG00000163159 | Nonsense | c.152C>G                |

| Number | Gene name | Chromosome | Gene_ID         | Mutation      | Nucleotide substitution |
|--------|-----------|------------|-----------------|---------------|-------------------------|
| 2384   | VRTN      | chr14      | ENSG00000133980 | Missense      | c.1798G>C               |
| 2385   | VSIG10L   | chr19      | ENSG00000186806 | Missense      | c.1295C>G               |
| 2386   | VSTM2A    | chr7       | ENSG00000170419 | 3'UTR         | c.*1007G>C              |
| 2387   | VSTM2A    | chr7       | ENSG00000170419 | 3'UTR         | c.*1409G>A              |
| 2388   | VSTM2B    | chr19      | ENSG00000187135 | Intron        | c.82+77G>C              |
| 2389   | VSTM4     | chr10      | ENSG00000165633 | 3'UTR         | c.*6G>C                 |
| 2390   | VSX2      | chr14      | ENSG00000119614 | Missense      | c.850G>C                |
| 2391   | VWC2      | chr7       | ENSG00000188730 | Silent        | c.522G>A                |
| 2392   | VWCE      | chr11      | ENSG00000167992 | Splice region | c.2231-6C>G             |
| 2393   | VWF       | chr12      | ENSG00000110799 | 3'UTR         | c.*133G>T               |
| 2394   | WBP1      | chr2       | ENSG00000239779 | Intron        | c.349+80 349+81insAA    |
| 2395   | WDCP      | chr2       | ENSG00000163026 | 3'UTR         | c.*265A>C               |
| 2396   | WDFY1     | chr2       | ENSG00000085449 | 3'UTR         | c.*1932G>C              |
| 2397   | WDFY1     | chr2       | ENSG00000085449 | 3'UTR         | c.*1164G>A              |
| 2398   | WDR13     | chrX       | ENSG00000101940 | Intron        | c.832-35G>A             |
| 2399   | WDR19     | chr4       | ENSG00000157796 | Silent        | c.2505C>G               |
| 2400   | WDR20     | chr14      | ENSG00000140153 | Intron        | c.250-63C>G             |
| 2401   | WDR27     | chr6       | ENSG00000184465 | Intron        | c.645-382C>T            |
| 2402   | WDR4      | chr21      | ENSG00000160193 | 3'UTR         | c.*571C>T               |
| 2403   | WDR4      | chr21      | ENSG00000160193 | Missense      | c.1234T>C               |
| 2404   | WDR87     | chr19      | ENSG00000171804 | Silent        | c.1731C>G               |
| 2405   | WIF1      | chr12      | ENSG00000156076 | Intron        | c.289-5992G>A           |
| 2406   | WNK2      | chr9       | ENSG00000165238 | Missense      | c.1566G>C               |
| 2407   | WNK4      | chr17      | ENSG00000126562 | Missense      | c.259C>G                |
| 2408   | WNT2      | chr7       | ENSG00000105989 | 3'UTR         | c.*1454C>T              |
| 2409   | WNT2      | chr7       | ENSG00000105989 | 3'UTR         | c.*1432C>T              |
| 2410   | WNT2      | chr7       | ENSG00000105989 | 3'UTR         | c.*304C>A               |
| 2411   | WSB1      | chr17      | ENSG00000109046 | 5'UTR         | c.-229G>C               |
| 2412   | WSB2      | chr12      | ENSG00000176871 | 3'UTR         | c.*864G>T               |
| 2413   | WWC2      | chr4       | ENSG00000151718 | 3'UTR         | c.*472G>A               |
| 2414   | XCR1      | chr3       | ENSG00000173578 | Silent        | c.339C>T                |
| 2415   | XDH       | chr2       | ENSG00000158125 | Intron        | c.1981-29G>A            |
| 2416   | XPO5      | chr6       | ENSG00000124571 | Intron        | c.3066+71C>T            |
| 2417   | XPO7      | chr8       | ENSG00000130227 | Intron        | c.1105-36G>A            |
| 2418   | XRCC5     | chr2       | ENSG00000079246 | 3'UTR         | c.*956G>C               |
| 2419   | XRCC6     | chr22      | ENSG00000196419 | 5'UTR         | c.-600C>T               |
| 2420   | YES1      | chr18      | ENSG00000176105 | Missense      | c.414G>C                |
| 2421   | YKT6      | chr7       | ENSG00000106636 | 5'Flank       |                         |
| 2422   | YOD1      | chr1       | ENSG00000180667 | 3'UTR         | c.*2036C>G              |
| 2423   | YRDC      | chr1       | ENSG00000196449 | Intron        | c.625-67C>T             |
| 2424   | ZBED1     | chrX       | ENSG00000214717 | Silent        | c.780C>T                |
| 2425   | ZBTB20    | chr3       | ENSG00000181722 | Silent        | c.1455G>A               |
| 2426   | ZBTB34    | chr9       | ENSG00000177125 | 3'UTR         | c.*4694C>T              |
| 2427   | ZBTB8OS   | chr1       | ENSG00000176261 | Nonsense      | c.202G>T                |
| 2428   | ZC2HC1A   | chr8       | ENSG00000104427 | Intron        | c.16+59C>A              |
| 2429   | ZC2HC1B   | chr6       | ENSG00000118491 | 5'Flank       |                         |
| 2430   | ZC3H10    | chr12      | ENSG00000135482 | Missense      | c.661C>T                |
| 2431   | ZC3H12C   | chr11      | ENSG00000149289 | Missense      | c.271G>A                |
| 2432   | ZC3H12C   | chr11      | ENSG00000149289 | Missense      | c.289G>C                |
| 2433   | ZC3H4     | chr19      | ENSG00000130749 | Missense      | c.170G>T                |
| 2434   | ZC3H6     | chr2       | ENSG00000188177 | 3'UTR         | c.*3392C>A              |
| 2435   | ZC3H6     | chr2       | ENSG00000188177 | 3'UTR         | c.*6121T>A              |
| 2436   | ZC3H7B    | chr22      | ENSG00000100403 | 5'UTR         | c.-1G>C                 |

| Number | Gene name | Chromosome | Gene_ID         | Mutation | Nucleotide substitution |
|--------|-----------|------------|-----------------|----------|-------------------------|
| 2437   | ZDHHC18   | chr1       | ENSG00000204160 | 3'UTR    | c.*88G>A                |
| 2438   | ZDHHC19   | chr3       | ENSG00000163958 | 5'UTR    | c.-68C>G                |
| 2439   | ZDHHC5    | chr11      | ENSG00000156599 | Nonsense | c.1193C>G               |
| 2440   | ZFHX3     | chr16      | ENSG00000140836 | Missense | c.6200C>T               |
| 2441   | ZFHX4     | chr8       | ENSG00000091656 | Missense | c.988G>C                |
| 2442   | ZFHX4     | chr8       | ENSG00000091656 | Missense | c.7748G>A               |
| 2443   | ZFHX4     | chr8       | ENSG00000091656 | Silent   | c.9582A>G               |
| 2444   | ZFP41     | chr8       | ENSG00000181638 | Missense | c.20G>A                 |
| 2445   | ZFPL1     | chr11      | ENSG00000162300 | Missense | c.406C>G                |
| 2446   | ZFPM1     | chr16      | ENSG00000179588 | Missense | c.2874G>C               |
| 2447   | ZFX       | chrX       | ENSG00000005889 | 3'UTR    | c.*254C>G               |
| 2448   | ZIC4      | chr3       | ENSG00000174963 | Missense | c.661C>G                |
| 2449   | ZIC4      | chr3       | ENSG00000174963 | Missense | c.379G>C                |
| 2450   | ZIM2      | chr19      | ENSG00000269699 | Missense | c.1471G>C               |
| 2451   | ZKSCAN5   | chr7       | ENSG00000196652 | Missense | c.1584G>C               |
| 2452   | ZMAT1     | chrX       | ENSG00000166432 | Intron   | c.121+5816G>A           |
| 2453   | ZMAT3     | chr3       | ENSG00000172667 | 3'UTR    | c.*3496C>T              |
| 2454   | ZMYND12   | chr1       | ENSG00000066185 | Missense | c.811G>C                |
| 2455   | ZMYND19   | chr9       | ENSG00000165724 | 5'UTR    | c.-16G>C                |
| 2456   | ZNF10     | chr12      | ENSG00000256223 | 5'UTR    | c.-530C>G               |
| 2457   | ZNF136    | chr19      | ENSG00000196646 | Silent   | c.792G>C                |
| 2458   | ZNF148    | chr3       | ENSG00000163848 | 3'UTR    | c.*2622G>T              |
| 2459   | ZNF2      | chr2       | ENSG00000275111 | 3'UTR    | c.*676G>C               |
| 2460   | ZNF252P   | chr8       | ENSG00000196922 | RNA      | n.1351G>C               |
| 2461   | ZNF260    | chr19      | ENSG00000254004 | 3'UTR    | c.*297A>C               |
| 2462   | ZNF274    | chr19      | ENSG00000171606 | Missense | c.979G>C                |
| 2463   | ZNF322    | chr6       | ENSG00000181315 | Missense | c.100G>A                |
| 2464   | ZNF326    | chr1       | ENSG00000162664 | Missense | c.464C>T                |
| 2465   | ZNF354C   | chr5       | ENSG00000177932 | 3'UTR    | c.*3045G>A              |
| 2466   | ZNF362    | chr1       | ENSG00000160094 | 3'UTR    | c.*772G>T               |
| 2467   | ZNF366    | chr5       | ENSG00000178175 | Missense | c.255G>T                |
| 2468   | ZNF37A    | chr10      | ENSG00000075407 | 3'UTR    | c.*3694A>T              |
| 2469   | ZNF385B   | chr2       | ENSG00000144331 | Missense | c.634G>A                |
| 2470   | ZNF391    | chr6       | ENSG00000124613 | Intron   | c.-188+45C>A            |
| 2471   | ZNF407    | chr18      | ENSG00000215421 | Nonsense | c.3394G>T               |
| 2472   | ZNF41     | chrX       | ENSG00000147124 | Missense | c.271G>A                |
| 2473   | ZNF410    | chr14      | ENSG00000119725 | Intron   | c.913+140C>T            |
| 2474   | ZNF410    | chr14      | ENSG00000119725 | Intron   | c.913+154C>T            |
| 2475   | ZNF414    | chr19      | ENSG00000133250 | 5'UTR    | c.-14G>C                |
| 2476   | ZNF420    | chr19      | ENSG00000197050 | Missense | c.224G>T                |
| 2477   | ZNF432    | chr19      | ENSG00000256087 | Silent   | c.975C>A                |
| 2478   | ZNF432    | chr19      | ENSG00000256087 | Missense | c.772G>A                |
| 2479   | ZNF442    | chr19      | ENSG00000198342 | Missense | c.238C>A                |
| 2480   | ZNF449    | chrX       | ENSG00000173275 | Silent   | c.621G>A                |
| 2481   | ZNF467    | chr7       | ENSG00000181444 | 3'UTR    | c.*25C>G                |
| 2482   | ZNF467    | chr7       | ENSG00000181444 | 3'UTR    | c.*2C>G                 |
| 2483   | ZNF467    | chr7       | ENSG00000181444 | Silent   | c.879C>A                |
| 2484   | ZNF490    | chr19      | ENSG00000188033 | 3'UTR    | c.*1730C>G              |
| 2485   | ZNF497    | chr19      | ENSG00000174586 | Intron   | c.-111-109G>A           |
| 2486   | ZNF502    | chr3       | ENSG00000196653 | Missense | c.357G>C                |
| 2487   | ZNF514    | chr2       | ENSG00000144026 | 3'UTR    | c.*428C>T               |
| 2488   | ZNF516    | chr18      | ENSG00000101493 | 3'UTR    | c.*402G>C               |
| 2489   | ZNF521    | chr18      | ENSG00000198795 | Missense | c.2949G>C               |

| Number | Gene name | Chromosome | Gene_ID         | Mutation | Nucleotide substitution |
|--------|-----------|------------|-----------------|----------|-------------------------|
| 2490   | ZNF541    | chr19      | ENSG00000118156 | Missense | c.142C>T                |
| 2491   | ZNF550    | chr19      | ENSG00000251369 | Missense | c.544C>T                |
| 2492   | ZNF566    | chr19      | ENSG00000186017 | 3'UTR    | c.*2212G>C              |
| 2493   | ZNF568    | chr19      | ENSG00000198453 | 3'UTR    | c.*390T>C               |
| 2494   | ZNF568    | chr19      | ENSG00000198453 | Missense | c.692G>C                |
| 2495   | ZNF578    | chr19      | ENSG00000258405 | Missense | c.601G>A                |
| 2496   | ZNF586    | chr19      | ENSG00000083828 | Intron   | c.34+65C>T              |
| 2497   | ZNF598    | chr16      | ENSG00000167962 | Intron   | c.2362-44G>T            |
| 2498   | ZNF609    | chr15      | ENSG00000180357 | Silent   | c.249G>T                |
| 2499   | ZNF609    | chr15      | ENSG00000180357 | Missense | c.659G>C                |
| 2500   | ZNF625    | chr19      | ENSG00000257591 | Intron   | c.3+140C>T              |
| 2501   | ZNF644    | chr1       | ENSG00000122482 | Missense | c.1870G>C               |
| 2502   | ZNF649    | chr19      | ENSG00000198093 | Missense | c.1132G>C               |
| 2503   | ZNF655    | chr7       | ENSG00000197343 | 3'UTR    | c.*884C>G               |
| 2504   | ZNF664    | chr12      | ENSG00000179195 | 3'UTR    | c.*495C>A               |
| 2505   | ZNF664    | chr12      | ENSG00000179195 | 3'UTR    | c.*1592C>G              |
| 2506   | ZNF664    | chr12      | ENSG00000179195 | 3'UTR    | c.*2265C>G              |
| 2507   | ZNF692    | chr1       | ENSG00000171163 | 5'UTR    | c.-197G>C               |
| 2508   | ZNF7      | chr8       | ENSG00000147789 | Missense | c.148C>G                |
| 2509   | ZNF785    | chr16      | ENSG00000197162 | 3'UTR    | c.*334G>A               |
| 2510   | ZNF827    | chr4       | ENSG00000151612 | Missense | c.698A>G                |
| 2511   | ZNF841    | chr19      | ENSG00000197608 | Nonsense | c.2547C>A               |
| 2512   | ZPLD1     | chr3       | ENSG00000170044 | 3'UTR    | c.*634T>A               |
| 2513   | ZSCAN18   | chr19      | ENSG00000121413 | Missense | c.776C>A                |
