# Supplementary material for: Stimulating T cell responses against patient-derived breast cancer cells with neoantigen peptide-loaded peripheral blood mononuclear cells
Source: Springer Nature journal article supplement (doi:10.1007/s00262-024-03627-3), 2024-02-13
Supplement: MOESM6 [file 26729214]

Supplementary Table S3b. List of 3,490 somatic mutations of PC-B-148CA

| Number | Gene name  | Chromosome | Gene_ID         | Mutation        | Nucleotide substitution |
|--------|------------|------------|-----------------|-----------------|-------------------------|
| 1      | A4GALT     | chr22      | ENSG00000128274 | Missense        | c.688A>G                |
| 2      | AACS       | chr12      | ENSG00000081760 | Intron          | c.571-647T>C            |
| 3      | AACS       | chr12      | ENSG00000081760 | Intron          | c.1310-1011del          |
| 4      | AAK1       | chr2       | ENSG00000115977 | 3'UTR           | c.*167del               |
| 5      | AASDHPPT   | chr11      | ENSG00000149313 | 3'UTR           | c.*1628dup              |
| 6      | ABCA13     | chr7       | ENSG00000179869 | Splice region   | c.12460-8del            |
| 7      | ABCA13     | chr7       | ENSG00000179869 | Missense        | c.12845G>A              |
| 8      | ABCA2      | chr9       | ENSG00000107331 | Missense        | c.5224A>G               |
| 9      | ABCA2      | chr9       | ENSG00000107331 | Missense        | c.572A>G                |
| 10     | ABCA7      | chr19      | ENSG00000064687 | Splice region   | c.1445+8G>A             |
| 11     | ABCA7      | chr19      | ENSG00000064687 | Silent          | c.4305A>C               |
| 12     | ABCC5      | chr3       | ENSG00000114770 | Missense        | c.1484C>T               |
| 13     | ABCD3      | chr1       | ENSG00000117528 | Intron          | c.1903-19del            |
| 14     | ABCF2      | chr7       | ENSG00000033050 | 5'UTR           | c.-148C>T               |
| 15     | ABCF3      | chr3       | ENSG00000161204 | Intron          | c.1552-46T>C            |
| 16     | ABCG4      | chr11      | ENSG00000172350 | Missense        | c.1250C>A               |
| 17     | ABHD17A    | chr19      | ENSG00000129968 | Missense        | c.604G>A                |
| 18     | ABHD17B    | chr9       | ENSG00000107362 | 3'UTR           | c.*32T>C                |
| 19     | ABHD2      | chr15      | ENSG00000140526 | 3'UTR           | c.*5920C>T              |
| 20     | ABI2       | chr2       | ENSG00000138443 | 3'UTR           | c.*10573C>T             |
| 21     | ABL2       | chr1       | ENSG00000143322 | 5'UTR           | c.-191G>A               |
| 22     | ABLIM1     | chr10      | ENSG00000099204 | Intron          | c.2142+41G>A            |
| 23     | ABLIM2     | chr4       | ENSG00000163995 | Missense        | c.1195A>G               |
| 24     | ABLIM3     | chr5       | ENSG00000173210 | Missense        | c.685T>C                |
| 25     | AC005324.3 | chr17      | ENSG00000251537 | 3'UTR           | c.*2125del              |
| 26     | AC006305.1 | chr18      | ENSG00000206129 | RNA             | n.713C>T                |
| 27     | AC008268.1 | chr2       | ENSG00000235584 | RNA             | n.211A>G                |
| 28     | AC015802.6 | chr17      | ENSG00000284526 | 3'UTR           | c.*3556del              |
| 29     | AC018638.1 | chr7       | ENSG00000229413 | 5'Flank         |                         |
| 30     | AC019209.3 | chr12      | ENSG00000256686 | Intron          | n.92-3115A>G            |
| 31     | AC019294.1 | chr15      | ENSG00000187812 | Intron          | n.125+11C>T             |
| 32     | AC019294.3 | chr15      | ENSG00000261043 | RNA             | n.92A>G                 |
| 33     | AC026464.4 | chr16      | ENSG00000260914 | Intron          | c.94-6937del            |
| 34     | AC080125.1 | chr2       | ENSG00000225406 | RNA             | n.642T>G                |
| 35     | AC093909.6 | chr4       | ENSG00000278974 | 3'Flank         |                         |
| 36     | AC100868.1 | chr8       | ENSG00000258417 | Silent          | c.378C>T                |
| 37     | AC105942.1 | chr1       | ENSG00000235501 | RNA             | n.1349G>A               |
| 38     | AC187653.1 | chr7       | ENSG00000248767 | Intron          | c.107+13dup             |
| 39     | ACAA2      | chr18      | ENSG00000167315 | Intron          | c.1110-57A>G            |
| 40     | ACAD11     | chr3       | ENSG00000240303 | Intron          | c.1071-10T>C            |
| 41     | ACADV1     | chr17      | ENSG00000072778 | Intron          | c.62+27G>T              |
| 42     | ACAP3      | chr1       | ENSG00000131584 | Missense        | c.71C>T                 |
| 43     | ACCS       | chr11      | ENSG00000110455 | Missense        | c.343T>C                |
| 44     | ACOT11     | chr1       | ENSG00000162390 | Intron          | c.1236+99del            |
| 45     | ACOT11     | chr1       | ENSG00000162390 | 3'UTR           | c.*3193del              |
| 46     | ACP4       | chr19      | ENSG00000142513 | Intron          | c.986+63T>C             |
| 47     | ACPP       | chr3       | ENSG00000014257 | Frame shift Ins | c.846dup                |
| 48     | ACPP       | chr3       | ENSG00000014257 | 3'UTR           | c.*1227A>G              |
| 49     | ACRV1      | chr11      | ENSG00000134940 | 3'UTR           | c.*234dup               |
| 50     | ACRV1      | chr11      | ENSG00000134940 | Silent          | c.201G>A                |
| 51     | ACSBG1     | chr15      | ENSG00000103740 | 3'UTR           | c.*3837A>G              |

| Number | Gene name | Chromosome | Gene_ID         | Mutation     | Nucleotide substitution |
|--------|-----------|------------|-----------------|--------------|-------------------------|
| 52     | ACSF2     | chr17      | ENSG00000167107 | Intron       | c.889-22A>G             |
| 53     | ACSF2     | chr17      | ENSG00000167107 | Splice site  | c.1216-2A>G             |
| 54     | ACSM3     | chr16      | ENSG00000005187 | Intron       | c.939+58A>C             |
| 55     | ACTC1     | chr15      | ENSG00000159251 | Intron       | c.617-48T>C             |
| 56     | ACTL10    | chr20      | ENSG00000182584 | 3'UTR        | c.*21del                |
| 57     | ACTR3     | chr2       | ENSG00000115091 | 3'UTR        | c.*1158del              |
| 58     | ACTR3C    | chr7       | ENSG00000106526 | 3'UTR        | c.*2589T>C              |
| 59     | ACTR3C    | chr7       | ENSG00000106526 | 3'UTR        | c.*1284T>C              |
| 60     | ACVR1B    | chr12      | ENSG00000135503 | 5'UTR        | c.-25G>T                |
| 61     | ACVR1B    | chr12      | ENSG00000135503 | 3'UTR        | c.*1590del              |
| 62     | ADA2      | chr22      | ENSG00000093072 | Silent       | c.1129C>T               |
| 63     | ADAL      | chr15      | ENSG00000168803 | 5'UTR        | c.-10del                |
| 64     | ADAM12    | chr10      | ENSG00000148848 | Intron       | c.2114-11del            |
| 65     | ADAM15    | chr1       | ENSG00000143537 | Silent       | c.2394A>G               |
| 66     | ADAM21    | chr14      | ENSG00000139985 | Missense     | c.1528C>T               |
| 67     | ADAM28    | chr8       | ENSG00000042980 | Intron       | c.648+15T>A             |
| 68     | ADAM28    | chr8       | ENSG00000042980 | 3'UTR        | c.*2418A>G              |
| 69     | ADAM7     | chr8       | ENSG00000069206 | Intron       | c.389+41T>C             |
| 70     | ADAMTS13  | chr9       | ENSG00000160323 | Missense     | c.863C>A                |
| 71     | ADAMTS17  | chr15      | ENSG00000140470 | Missense     | c.724G>A                |
| 72     | ADAMTS20  | chr12      | ENSG00000173157 | 3'UTR        | c.*676T>A               |
| 73     | ADAMTS3   | chr4       | ENSG00000156140 | Missense     | c.125A>G                |
| 74     | ADAMTS4   | chr1       | ENSG00000158859 | 3'UTR        | c.*597 *598insC         |
| 75     | ADAMTS9   | chr3       | ENSG00000163638 | Intron       | c.5208+40del            |
| 76     | ADAMTSL1  | chr9       | ENSG00000178031 | 3'UTR        | c.*760del               |
| 77     | ADAMTSL1  | chr9       | ENSG00000178031 | Missense     | c.1690A>G               |
| 78     | ADAMTSL3  | chr15      | ENSG00000156218 | 3'UTR        | c.*54T>C                |
| 79     | ADAMTSL4  | chr1       | ENSG00000143382 | Intron       | c.435-50G>T             |
| 80     | ADAT2     | chr6       | ENSG00000189007 | Intron       | c.97-5925del            |
| 81     | ADCK2     | chr7       | ENSG00000133597 | Intron       | c.1741-5 1741-3del      |
| 82     | ADCY1     | chr7       | ENSG00000164742 | 3'UTR        | c.*3396del              |
| 83     | ADCY10    | chr1       | ENSG00000143199 | Missense     | c.1190G>A               |
| 84     | ADCY3     | chr2       | ENSG00000138031 | In Frame Del | c.2564 2566del          |
| 85     | ADCY3     | chr2       | ENSG00000138031 | In Frame Del | c.2564 2566del          |
| 86     | ADCY5     | chr3       | ENSG00000173175 | Intron       | c.85-18T>A              |
| 87     | ADCY8     | chr8       | ENSG00000155897 | 5'Flank      |                         |
| 88     | ADCY9     | chr16      | ENSG00000162104 | Silent       | c.2433G>A               |
| 89     | ADCY9     | chr16      | ENSG00000162104 | Missense     | c.1475C>T               |
| 90     | ADCYAP1   | chr18      | ENSG00000141433 | 3'UTR        | c.*1745 *1746del        |
| 91     | ADCYAP1R1 | chr7       | ENSG00000078549 | 3'UTR        | c.*3456del              |
| 92     | ADD1      | chr4       | ENSG00000087274 | Intron       | c.511-17A>G             |
| 93     | ADGRA2    | chr8       | ENSG00000020181 | Missense     | c.1849G>A               |
| 94     | ADGRB1    | chr8       | ENSG00000181790 | Silent       | c.339C>A                |
| 95     | ADGRD2    | chr9       | ENSG00000180264 | Intron       | c.2522-22C>T            |
| 96     | ADGRE2    | chr19      | ENSG00000127507 | Intron       | c.2353-26A>G            |
| 97     | ADGRE4P   | chr19      | ENSG00000268758 | Intron       | n.74+2795T>C            |
| 98     | ADGRG7    | chr3       | ENSG00000144820 | Missense     | c.1153T>A               |
| 99     | ADGRL1    | chr19      | ENSG00000072071 | Missense     | c.232A>G                |
| 100    | ADGRL3    | chr4       | ENSG00000150471 | 3'UTR        | c.*741del               |
| 101    | ADH5      | chr4       | ENSG00000197894 | Intron       | c.1100+66G>A            |
| 102    | ADH5      | chr4       | ENSG00000197894 | Intron       | c.13-452C>G             |
| 103    | ADNP      | chr20      | ENSG00000101126 | 3'UTR        | c.*1424T>C              |
| 104    | ADPRH     | chr3       | ENSG00000144843 | 3'UTR        | c.*1363A>G              |

| Number | Gene name  | Chromosome | Gene_ID         | Mutation        | Nucleotide substitution |
|--------|------------|------------|-----------------|-----------------|-------------------------|
| 105    | AEBP2      | chr12      | ENSG00000139154 | Intron          | c.879+15T>C             |
| 106    | AFAP1L1    | chr5       | ENSG00000157510 | 3'UTR           | c.*1749del              |
| 107    | AFTPH      | chr2       | ENSG00000119844 | Silent          | c.2208A>G               |
| 108    | AFTPH      | chr2       | ENSG00000119844 | Missense        | c.2377A>G               |
| 109    | AGAP1      | chr2       | ENSG00000157985 | Intron          | c.396+36del             |
| 110    | AGAP1      | chr2       | ENSG00000157985 | Intron          | c.673+23488del          |
| 111    | AGAP3      | chr7       | ENSG00000133612 | Missense        | c.1259A>G               |
| 112    | AGFG1      | chr2       | ENSG00000173744 | Splice region   | c.694+4A>C              |
| 113    | AGFG2      | chr7       | ENSG00000106351 | 3'UTR           | c.*849T>C               |
| 114    | AGL        | chr1       | ENSG00000162688 | Missense        | c.4240A>G               |
| 115    | AGPAT3     | chr21      | ENSG00000160216 | Missense        | c.96G>T                 |
| 116    | AGPAT3     | chr21      | ENSG00000160216 | Intron          | c.768-76A>G             |
| 117    | AGRN       | chr1       | ENSG00000188157 | Missense        | c.1435T>C               |
| 118    | AGRN       | chr1       | ENSG00000188157 | Intron          | c.3751+33G>A            |
| 119    | AHCYL1     | chr1       | ENSG00000168710 | 3'UTR           | c.*1553C>T              |
| 120    | AHDC1      | chr1       | ENSG00000126705 | Silent          | c.3597C>G               |
| 121    | AHNAK      | chr11      | ENSG00000124942 | 3'UTR           | c.*259 *260dup          |
| 122    | AHNAK      | chr11      | ENSG00000124942 | Missense        | c.12155 12156delinsGA   |
| 123    | AICDA      | chr12      | ENSG00000111732 | Missense        | c.106C>T                |
| 124    | AIDA       | chr1       | ENSG00000186063 | Frame shift del | c.751del                |
| 125    | AIDA       | chr1       | ENSG00000186063 | Frame shift del | c.751del                |
| 126    | AIF1L      | chr9       | ENSG00000126878 | 3'UTR           | c.*2162dup              |
| 127    | AIP1       | chr17      | ENSG00000129221 | Intron          | c.96+22C>A              |
| 128    | AK2        | chr1       | ENSG00000004455 | Missense        | c.394C>T                |
| 129    | AK3        | chr9       | ENSG00000147853 | 3'UTR           | c.*1403del              |
| 130    | AKNA       | chr9       | ENSG00000106948 | Intron          | c.2448-23A>G            |
| 131    | AKRIC1     | chr10      | ENSG00000187134 | 3'UTR           | c.*1993del              |
| 132    | AKT2       | chr19      | ENSG00000105221 | 3'UTR           | c.*3155del              |
| 133    | AL031590.1 | chr22      | ENSG00000284633 | Intron          | n.110-15676del          |
| 134    | AL135905.2 | chr6       | ENSG00000285976 | Intron          | c.*679-98T>C            |
| 135    | AL135905.2 | chr6       | ENSG00000285976 | 3'UTR           | c.*2899dup              |
| 136    | ALDH1A3    | chr15      | ENSG00000184254 | 5'UTR           | c.-80T>C                |
| 137    | ALDH1L1    | chr3       | ENSG00000144908 | Nonsense        | c.1114G>T               |
| 138    | ALDH3A2    | chr17      | ENSG00000072210 | Intron          | c.1443+5665del          |
| 139    | ALDH8A1    | chr6       | ENSG00000118514 | 3'UTR           | c.*201dup               |
| 140    | ALDH9A1    | chr1       | ENSG00000143149 | 3'UTR           | c.*557del               |
| 141    | ALG10      | chr12      | ENSG00000139133 | Silent          | c.897C>T                |
| 142    | ALKBH4     | chr7       | ENSG00000160993 | 5'Flank         |                         |
| 143    | ALKBH6     | chr19      | ENSG00000239382 | Missense        | c.247G>A                |
| 144    | ALMS1      | chr2       | ENSG00000116127 | Silent          | c.12108A>G              |
| 145    | ALPI       | chr2       | ENSG00000163295 | 3'UTR           | c.*389G>A               |
| 146    | ALPK3      | chr15      | ENSG00000136383 | 3'UTR           | c.*4816A>G              |
| 147    | ALPL       | chr1       | ENSG00000162551 | Intron          | c.61+64T>C              |
| 148    | ALX4       | chr11      | ENSG00000052850 | 3'UTR           | c.*3069C>T              |
| 149    | AMDHD2     | chr16      | ENSG00000162066 | Intron          | c.1142-26dup            |
| 150    | AMER2      | chr13      | ENSG00000165566 | 5'UTR           | c.-111G>A               |
| 151    | AMFR       | chr16      | ENSG00000159461 | Silent          | c.1054C>A               |
| 152    | AMIGO3     | chr3       | ENSG00000176020 | Missense        | c.659C>A                |
| 153    | AMT        | chr3       | ENSG00000145020 | Missense        | c.569T>C                |
| 154    | AMZ1       | chr7       | ENSG00000174945 | Intron          | c.305-20C>T             |
| 155    | ANAPC4     | chr4       | ENSG00000053900 | Intron          | c.877-14del             |
| 156    | ANGPT1     | chr8       | ENSG00000154188 | Nonsense        | c.70C>T                 |
| 157    | ANGPTL5    | chr11      | ENSG00000187151 | Splice region   | c.661+5A>C              |

| Number | Gene name  | Chromosome | Gene_ID         | Mutation        | Nucleotide substitution |
|--------|------------|------------|-----------------|-----------------|-------------------------|
| 158    | ANGPTL6    | chr19      | ENSG00000130812 | Silent          | c.618G>A                |
| 159    | ANGPTL7    | chr1       | ENSG00000171819 | Missense        | c.31T>C                 |
| 160    | ANK1       | chr8       | ENSG00000029534 | 3'Flank         |                         |
| 161    | ANK2       | chr4       | ENSG00000145362 | Missense        | c.2126A>G               |
| 162    | ANK2       | chr4       | ENSG00000145362 | Frame shift Ins | c.10268dup              |
| 163    | ANK3       | chr10      | ENSG00000151150 | Silent          | c.4611A>G               |
| 164    | ANKEF1     | chr20      | ENSG00000132623 | Silent          | c.288A>G                |
| 165    | ANKFY1     | chr17      | ENSG00000185722 | Frame shift del | c.2728del               |
| 166    | ANKFY1     | chr17      | ENSG00000185722 | Frame shift del | c.2728del               |
| 167    | ANKFY1     | chr17      | ENSG00000185722 | Missense        | c.1613C>T               |
| 168    | ANKH       | chr5       | ENSG00000154122 | 3'UTR           | c.*3900del              |
| 169    | ANKH       | chr5       | ENSG00000154122 | 3'UTR           | c.*1278del              |
| 170    | ANKIB1     | chr7       | ENSG00000001629 | Missense        | c.2261A>G               |
| 171    | ANKIB1     | chr7       | ENSG00000001629 | Silent          | c.2355T>C               |
| 172    | ANKK1      | chr11      | ENSG00000170209 | Silent          | c.117G>A                |
| 173    | ANKLE2     | chr12      | ENSG00000176915 | Intron          | c.182-434 182-433del    |
| 174    | ANKRD13A   | chr12      | ENSG00000076513 | 3'UTR           | c.*524A>T               |
| 175    | ANKRD13C   | chr1       | ENSG00000118454 | 5'UTR           | c.-219A>C               |
| 176    | ANKRD13D   | chr11      | ENSG00000172932 | 3'UTR           | c.*11del                |
| 177    | ANKRD29    | chr18      | ENSG00000154065 | 3'UTR           | c.*1228A>G              |
| 178    | ANKRD30B   | chr18      | ENSG00000180777 | Intron          | c.1330-48del            |
| 179    | ANKRD33    | chr12      | ENSG00000167612 | Missense        | c.1310G>T               |
| 180    | ANKRD36    | chr2       | ENSG00000135976 | Missense        | c.75A>T                 |
| 181    | ANKRD36    | chr2       | ENSG00000135976 | Missense        | c.79 80delinsTA         |
| 182    | ANKRD36    | chr2       | ENSG00000135976 | Intron          | c.1560+14T>C            |
| 183    | ANKRD36C   | chr2       | ENSG00000174501 | Intron          | c.*6+2306del            |
| 184    | ANKRD40    | chr17      | ENSG00000154945 | 3'UTR           | c.*13T>C                |
| 185    | ANKRD45    | chr1       | ENSG00000183831 | Intron          | c.-16+2110del           |
| 186    | ANKRD49    | chr11      | ENSG00000168876 | Silent          | c.348C>A                |
| 187    | ANKRD52    | chr12      | ENSG00000139645 | Missense        | c.2637G>T               |
| 188    | ANKS1B     | chr12      | ENSG00000185046 | 3'UTR           | c.*1198A>G              |
| 189    | ANKZF1     | chr2       | ENSG00000163516 | Intron          | c.820-61del             |
| 190    | ANO4       | chr12      | ENSG00000151572 | 5'Flank         |                         |
| 191    | ANO7       | chr2       | ENSG00000146205 | Intron          | c.2695-44T>C            |
| 192    | ANO8       | chr19      | ENSG00000074855 | Missense        | c.1357C>A               |
| 193    | ANPEP      | chr15      | ENSG00000166825 | Missense        | c.1027C>A               |
| 194    | ANXA2      | chr15      | ENSG00000182718 | Intron          | c.202+7745C>A           |
| 195    | AOAH       | chr7       | ENSG00000136250 | Silent          | c.1350C>T               |
| 196    | AOC1       | chr7       | ENSG00000002726 | Intron          | c.-16-64A>G             |
| 197    | AOC1       | chr7       | ENSG00000002726 | Missense        | c.939G>T                |
| 198    | AOC3       | chr17      | ENSG00000131471 | Silent          | c.477T>C                |
| 199    | AP001267.5 | chr11      | ENSG00000285827 | Intron          | c.-799+32301T>C         |
| 200    | AP1M2      | chr19      | ENSG00000129354 | Silent          | c.1119G>C               |
| 201    | AP2A2      | chr11      | ENSG00000183020 | Intron          | c.67+7580G>A            |
| 202    | AP3M1      | chr10      | ENSG00000185009 | 3'UTR           | c.*1188 *1190del        |
| 203    | AP3S2      | chr15      | ENSG00000157823 | Intron          | c.274-6676del           |
| 204    | AP4M1      | chr7       | ENSG00000221838 | Intron          | c.148-32del             |
| 205    | APAF1      | chr12      | ENSG00000120868 | Missense        | c.1442T>C               |
| 206    | APAF1      | chr12      | ENSG00000120868 | Intron          | c.956-7057T>C           |
| 207    | APAF1      | chr12      | ENSG00000120868 | 3'UTR           | c.*652del               |
| 208    | APBB1IP    | chr10      | ENSG00000077420 | 3'UTR           | c.*202T>C               |
| 209    | APEX2      | chrX       | ENSG00000169188 | 3'UTR           | c.*1149dup              |
| 210    | APH1A      | chr1       | ENSG00000117362 | 5'UTR           | c.-454dup               |

| Number | Gene name | Chromosome | Gene_ID         | Mutation        | Nucleotide substitution |
|--------|-----------|------------|-----------------|-----------------|-------------------------|
| 211    | APLP2     | chr11      | ENSG00000084234 | Intron          | c.2191-45T>C            |
| 212    | APOA2     | chr1       | ENSG00000158874 | Missense        | c.8T>C                  |
| 213    | AQP3      | chr9       | ENSG00000165272 | Missense        | c.559C>T                |
| 214    | AQP8      | chr16      | ENSG00000103375 | Silent          | c.747T>C                |
| 215    | ARCN1     | chr11      | ENSG00000095139 | Silent          | c.459T>C                |
| 216    | AREG      | chr4       | ENSG00000109321 | Silent          | c.267C>T                |
| 217    | AREL1     | chr14      | ENSG00000119682 | 3'UTR           | c.*2114del              |
| 218    | ARF1      | chr1       | ENSG00000143761 | 3'Flank         |                         |
| 219    | ARFGEF1   | chr8       | ENSG00000066777 | Frame shift Ins | c.4655dup               |
| 220    | ARFGEF2   | chr20      | ENSG00000124198 | Intron          | c.3432+773C>T           |
| 221    | ARFGEF2   | chr20      | ENSG00000124198 | 3'UTR           | c.*2805 *2806del        |
| 222    | ARFGEF3   | chr6       | ENSG00000112379 | Intron          | c.3369-30A>T            |
| 223    | ARFGEF3   | chr6       | ENSG00000112379 | Intron          | c.4097-48del            |
| 224    | ARFIP1    | chr4       | ENSG00000164144 | 3'UTR           | c.*742del               |
| 225    | ARGLU1    | chr13      | ENSG00000134884 | 3'UTR           | c.*1692del              |
| 226    | ARHGAP10  | chr4       | ENSG00000071205 | Missense        | c.173G>C                |
| 227    | ARHGAP10  | chr4       | ENSG00000071205 | Intron          | c.1557-14dup            |
| 228    | ARHGAP12  | chr10      | ENSG00000165322 | Intron          | c.1796-88A>G            |
| 229    | ARHGAP12  | chr10      | ENSG00000165322 | Frame shift del | c.1782del               |
| 230    | ARHGAP12  | chr10      | ENSG00000165322 | Frame shift del | c.1782del               |
| 231    | ARHGAP18  | chr6       | ENSG00000146376 | Intron          | c.616+37del             |
| 232    | ARHGAP20  | chr11      | ENSG00000137727 | Missense        | c.2105G>A               |
| 233    | ARHGAP26  | chr5       | ENSG00000145819 | 3'UTR           | c.*5422del              |
| 234    | ARHGAP29  | chr1       | ENSG00000137962 | 3'UTR           | c.*484T>C               |
| 235    | ARHGAP31  | chr3       | ENSG00000031081 | 5'Flank         |                         |
| 236    | ARHGAP31  | chr3       | ENSG00000031081 | 3'UTR           | c.*3582G>T              |
| 237    | ARHGAP33  | chr19      | ENSG00000004777 | Frame shift Ins | c.3254dup               |
| 238    | ARHGAP44  | chr17      | ENSG00000006740 | 3'UTR           | c.*393dup               |
| 239    | ARHGAP6   | chrX       | ENSG00000047648 | 3'UTR           | c.*1218 *1219del        |
| 240    | ARHGAP8   | chr22      | ENSG00000241484 | Intron          | c.299+851del            |
| 241    | ARHGEF1   | chr19      | ENSG00000076928 | Missense        | c.1903C>T               |
| 242    | ARHGEF11  | chr1       | ENSG00000132694 | Missense        | c.4385C>T               |
| 243    | ARHGEF12  | chr11      | ENSG00000196914 | Frame shift del | c.1562del               |
| 244    | ARHGEF12  | chr11      | ENSG00000196914 | Frame shift del | c.1562del               |
| 245    | ARHGEF15  | chr17      | ENSG00000198844 | Missense        | c.716G>A                |
| 246    | ARHGEF16  | chr1       | ENSG00000130762 | Missense        | c.70C>T                 |
| 247    | ARHGEF2   | chr1       | ENSG00000116584 | Intron          | c.2885-56A>G            |
| 248    | ARHGEF2   | chr1       | ENSG00000116584 | Frame shift del | c.1919del               |
| 249    | ARHGEF2   | chr1       | ENSG00000116584 | Frame shift del | c.1919del               |
| 250    | ARHGEF28  | chr5       | ENSG00000214944 | Intron          | c.33+109del             |
| 251    | ARHGEF5   | chr7       | ENSG00000050327 | 3'UTR           | c.*238del               |
| 252    | ARID1A    | chr1       | ENSG00000117713 | Frame shift Ins | c.5548dup               |
| 253    | ARID1A    | chr1       | ENSG00000117713 | Silent          | c.6426C>T               |
| 254    | ARID1A    | chr1       | ENSG00000117713 | Missense        | c.6767C>T               |
| 255    | ARID1A    | chr1       | ENSG00000117713 | 3'UTR           | c.*577A>G               |
| 256    | ARID1A    | chr1       | ENSG00000117713 | 3'UTR           | c.*1253del              |
| 257    | ARID4A    | chr14      | ENSG00000032219 | Intron          | c.118-1434A>G           |
| 258    | ARIH1     | chr15      | ENSG00000166233 | Intron          | c.589-35A>G             |
| 259    | ARL10     | chr5       | ENSG00000175414 | 3'UTR           | c.*1538del              |
| 260    | ARL15     | chr5       | ENSG00000185305 | 3'UTR           | c.*488del               |
| 261    | ARL4C     | chr2       | ENSG00000188042 | 3'UTR           | c.*938dup               |
| 262    | ARL5B     | chr10      | ENSG00000165997 | 3'UTR           | c.*5427A>G              |
| 263    | ARMC12    | chr6       | ENSG00000157343 | Missense        | c.19C>A                 |

| Number | Gene name | Chromosome | Gene_ID         | Mutation        | Nucleotide substitution |
|--------|-----------|------------|-----------------|-----------------|-------------------------|
| 264    | ARMC6     | chr19      | ENSG00000105676 | Intron          | c.778+62T>C             |
| 265    | ARNT      | chr1       | ENSG00000143437 | Intron          | c.1506-44A>T            |
| 266    | ARNT2     | chr15      | ENSG00000172379 | 5'Flank         |                         |
| 267    | ARNT2     | chr15      | ENSG00000172379 | Silent          | c.915A>G                |
| 268    | ARNTL2    | chr12      | ENSG00000029153 | Missense        | c.1357A>C               |
| 269    | ARNTL2    | chr12      | ENSG00000029153 | 3'UTR           | c.*2707T>A              |
| 270    | ARPC5L    | chr9       | ENSG00000136950 | 5'UTR           | c.-314T>C               |
| 271    | ART4      | chr12      | ENSG00000111339 | 3'UTR           | c.*2313del              |
| 272    | ARX       | chrX       | ENSG00000004848 | 3'UTR           | c.*683del               |
| 273    | ASAP1     | chr8       | ENSG00000153317 | Intron          | c.166-16C>T             |
| 274    | ASB13     | chr10      | ENSG00000196372 | 3'UTR           | c.*254G>A               |
| 275    | ASB15     | chr7       | ENSG00000146809 | Missense        | c.1588A>G               |
| 276    | ASCC1     | chr10      | ENSG00000138303 | Intron          | c.311-1578T>G           |
| 277    | ASIC3     | chr7       | ENSG00000213199 | Silent          | c.444A>G                |
| 278    | ASPHD2    | chr22      | ENSG00000128203 | 3'UTR           | c.*1034del              |
| 279    | ASPM      | chr1       | ENSG00000066279 | Missense        | c.3739A>G               |
| 280    | ASPM      | chr1       | ENSG00000066279 | Silent          | c.2649C>T               |
| 281    | ASPN      | chr9       | ENSG00000106819 | Frame shift del | c.201del                |
| 282    | ASPN      | chr9       | ENSG00000106819 | Frame shift del | c.201del                |
| 283    | ASPSCR1   | chr17      | ENSG00000169696 | Intron          | c.1170+533_1170+534del  |
| 284    | ASXL2     | chr2       | ENSG00000143970 | Missense        | c.1838G>A               |
| 285    | ATAD3A    | chr1       | ENSG00000197785 | Silent          | c.381T>C                |
| 286    | ATAD3B    | chr1       | ENSG00000160072 | Missense        | c.1312T>C               |
| 287    | ATAD5     | chr17      | ENSG00000176208 | Silent          | c.2505T>C               |
| 288    | ATF7IP2   | chr16      | ENSG00000166669 | 3'UTR           | c.*384del               |
| 289    | ATG7      | chr3       | ENSG00000197548 | Intron          | c.-10-38T>C             |
| 290    | ATP10D    | chr4       | ENSG00000145246 | 3'UTR           | c.*573A>G               |
| 291    | ATP11A    | chr13      | ENSG00000068650 | Intron          | c.570+55C>A             |
| 292    | ATP11A    | chr13      | ENSG00000068650 | Silent          | c.3192C>T               |
| 293    | ATP11B    | chr3       | ENSG00000058063 | Missense        | c.779T>C                |
| 294    | ATP13A2   | chr1       | ENSG00000159363 | Intron          | c.1040-44G>T            |
| 295    | ATP13A3   | chr3       | ENSG00000133657 | 5'Flank         |                         |
| 296    | ATP1B1    | chr1       | ENSG00000143153 | Intron          | c.98-739A>G             |
| 297    | ATP2B2    | chr3       | ENSG00000157087 | 3'UTR           | c.*1633del              |
| 298    | ATP2B2    | chr3       | ENSG00000157087 | Intron          | c.3096+69C>G            |
| 299    | ATP2B3    | chrX       | ENSG00000067842 | Missense        | c.2474T>C               |
| 300    | ATP2B3    | chrX       | ENSG00000067842 | 3'UTR           | c.*789T>G               |
| 301    | ATP5F1A   | chr18      | ENSG00000152234 | Intron          | c.1176+56A>G            |
| 302    | ATP5F1C   | chr10      | ENSG00000165629 | Intron          | c.891-775dup            |
| 303    | ATP6V0D1  | chr16      | ENSG00000159720 | 3'UTR           | c.*209del               |
| 304    | ATP6V1B1  | chr2       | ENSG00000116039 | Frame shift Ins | c.1155dup               |
| 305    | ATP7A     | chrX       | ENSG00000165240 | 3'UTR           | c.*1861dup              |
| 306    | ATP8A2    | chr13      | ENSG00000132932 | Intron          | c.2601+8713del          |
| 307    | ATP8A2    | chr13      | ENSG00000132932 | Intron          | c.2690+12A>G            |
| 308    | ATP8B3    | chr19      | ENSG00000130270 | Intron          | c.2378+9T>C             |
| 309    | ATP8B3    | chr19      | ENSG00000130270 | Intron          | c.1585-41G>A            |
| 310    | ATPAF2    | chr17      | ENSG00000171953 | Intron          | c.179-51A>G             |
| 311    | ATXN1     | chr6       | ENSG00000124788 | 3'UTR           | c.*5657del              |
| 312    | ATXN1     | chr6       | ENSG00000124788 | Missense        | c.1946C>T               |
| 313    | ATXN3     | chr14      | ENSG00000066427 | 3'UTR           | c.*1753A>G              |
| 314    | ATXN3     | chr14      | ENSG00000066427 | Silent          | c.351C>T                |
| 315    | ATXN7L1   | chr7       | ENSG00000146776 | Frame shift del | c.1933del               |
| 316    | ATXN7L1   | chr7       | ENSG00000146776 | Frame shift del | c.1933del               |

| Number | Gene name | Chromosome | Gene_ID         | Mutation         | Nucleotide substitution |
|--------|-----------|------------|-----------------|------------------|-------------------------|
| 317    | AVIL      | chr12      | ENSG00000135407 | Missense         | c.1613A>G               |
| 318    | AVL9      | chr7       | ENSG00000105778 | Intron           | c.529+52A>G             |
| 319    | AVL9      | chr7       | ENSG00000105778 | 3'UTR            | c.*4275del              |
| 320    | AZGP1     | chr7       | ENSG00000160862 | Intron           | c.337+1504 337+1511del  |
| 321    | B3GALNT2  | chr1       | ENSG00000162885 | 3'UTR            | c.*197A>G               |
| 322    | B3GAT3    | chr11      | ENSG00000149541 | Splice region    | c.910-5T>G              |
| 323    | B3GLCT    | chr13      | ENSG00000187676 | Intron           | c.121-134C>T            |
| 324    | B3GLCT    | chr13      | ENSG00000187676 | 3'UTR            | c.*1246A>G              |
| 325    | B4GALT1   | chr9       | ENSG00000086062 | 3'UTR            | c.*705del               |
| 326    | B4GALT2   | chr1       | ENSG00000117411 | Intron           | c.950+42 950+43delinsAG |
| 327    | B4GALT6   | chr18      | ENSG00000118276 | Missense         | c.497C>T                |
| 328    | BAALC     | chr8       | ENSG00000164929 | 3'UTR            | c.*1650 *1651del        |
| 329    | BABAM2    | chr2       | ENSG00000158019 | 5'UTR            | c.-138T>C               |
| 330    | BACE1     | chr11      | ENSG00000186318 | Intron           | c.262-661del            |
| 331    | BAHCC1    | chr17      | ENSG00000266074 | Intron           | c.179-3998G>C           |
| 332    | BAIAP2L2  | chr22      | ENSG00000128298 | 5'UTR            | c.-48A>G                |
| 333    | BANF1     | chr11      | ENSG00000175334 | Missense         | c.110G>T                |
| 334    | BAZ1B     | chr7       | ENSG00000009954 | Intron           | c.3729-11del            |
| 335    | BBS7      | chr4       | ENSG00000138686 | Missense         | c.596A>G                |
| 336    | BCAP29    | chr7       | ENSG00000075790 | 3'UTR            | c.*303del               |
| 337    | BCAS1     | chr20      | ENSG00000064787 | Intron           | c.1365-18C>T            |
| 338    | BCKDHA    | chr19      | ENSG00000248098 | Missense         | c.233T>C                |
| 339    | BCKDHA    | chr19      | ENSG00000248098 | 3'UTR            | c.*385T>C               |
| 340    | BCKDHB    | chr6       | ENSG00000083123 | Intron           | c.634-14del             |
| 341    | BCL2L14   | chr12      | ENSG00000121380 | Intron           | c.*340-97G>A            |
| 342    | BCL9      | chr1       | ENSG00000116128 | Missense         | c.4097C>T               |
| 343    | BCL9L     | chr11      | ENSG00000186174 | Silent           | c.3234A>T               |
| 344    | BCLAF1    | chr6       | ENSG00000029363 | Missense         | c.1798T>C               |
| 345    | BCLAF3    | chrX       | ENSG00000173681 | 3'UTR            | c.*2797del              |
| 346    | BCO2      | chr11      | ENSG00000197580 | Intron           | c.736+48G>A             |
| 347    | BCOR      | chrX       | ENSG00000183337 | 3'UTR            | c.*378A>G               |
| 348    | BCR       | chr22      | ENSG00000186716 | Intron           | c.1974+82del            |
| 349    | BDNF      | chr11      | ENSG00000176697 | Frame shift del  | c.538del                |
| 350    | BDNF      | chr11      | ENSG00000176697 | Frame shift del  | c.538del                |
| 351    | BEND3     | chr6       | ENSG00000178409 | 3'UTR            | c.*398del               |
| 352    | BHLHE22   | chr8       | ENSG00000180828 | 3'UTR            | c.*607G>A               |
| 353    | BICRA     | chr19      | ENSG00000063169 | Frame shift del  | c.2138del               |
| 354    | BID       | chr22      | ENSG00000015475 | Silent           | c.459C>T                |
| 355    | BIN1      | chr2       | ENSG00000136717 | 3'UTR            | c.*479del               |
| 356    | BIRC2     | chr11      | ENSG00000110330 | Intron           | c.1074+14del            |
| 357    | BLK       | chr8       | ENSG00000136573 | Intron           | c.1029+780C>T           |
| 358    | BLOC1S2   | chr10      | ENSG00000196072 | Silent           | c.24A>G                 |
| 359    | BLOC1S6   | chr15      | ENSG00000104164 | 3'UTR            | c.*1293T>C              |
| 360    | BMF       | chr15      | ENSG00000104081 | 3'UTR            | c.*2114del              |
| 361    | BMP2K     | chr4       | ENSG00000138756 | 3'UTR            | c.*3235T>C              |
| 362    | BNC2      | chr9       | ENSG00000173068 | 3'UTR            | c.*1681C>T              |
| 363    | BNC2      | chr9       | ENSG00000173068 | Nonstop Mutation | c.3098A>G               |
| 364    | BNC2      | chr9       | ENSG00000173068 | Missense         | c.2966C>A               |
| 365    | BPGM      | chr7       | ENSG00000172331 | 3'UTR            | c.*318A>G               |
| 366    | BPTF      | chr17      | ENSG00000171634 | In Frame Del     | c.589 603del            |
| 367    | BPTF      | chr17      | ENSG00000171634 | Frame shift del  | c.2881del               |
| 368    | BRAF      | chr7       | ENSG00000157764 | Missense         | c.1064A>T               |
| 369    | BRAP      | chr12      | ENSG00000089234 | Intron           | c.1325+31A>G            |

| Number | Gene name | Chromosome | Gene_ID         | Mutation        | Nucleotide substitution |
|--------|-----------|------------|-----------------|-----------------|-------------------------|
| 370    | BRCA1     | chr17      | ENSG00000012048 | Intron          | c.-19-20124A>G          |
| 371    | BRCA2     | chr13      | ENSG00000139618 | 3'UTR           | c.*383G>A               |
| 372    | BRD1      | chr22      | ENSG00000100425 | Silent          | c.1602C>T               |
| 373    | BRD3      | chr9       | ENSG00000169925 | Missense        | c.190G>T                |
| 374    | BRF1      | chr14      | ENSG00000185024 | Intron          | c.-161-11del            |
| 375    | BRIX1     | chr5       | ENSG00000113460 | Intron          | c.562-7del              |
| 376    | BRK1      | chr3       | ENSG00000254999 | Intron          | c.202-58del             |
| 377    | BTAF1     | chr10      | ENSG00000095564 | Intron          | c.1906-12del            |
| 378    | BTBD8     | chr1       | ENSG00000189195 | Frame shift del | c.3516del               |
| 379    | BTN3A2    | chr6       | ENSG00000186470 | Missense        | c.715G>A                |
| 380    | BUD23     | chr7       | ENSG00000071462 | 5'Flank         |                         |
| 381    | C10orf105 | chr10      | ENSG00000214688 | 3'UTR           | c.*369C>A               |
| 382    | C11orf45  | chr11      | ENSG00000174370 | 3'UTR           | c.*1621del              |
| 383    | C12orf29  | chr12      | ENSG00000133641 | Intron          | c.91-11C>T              |
| 384    | C14orf132 | chr14      | ENSG00000227051 | 3'UTR           | c.*2370del              |
| 385    | C15orf39  | chr15      | ENSG00000167173 | 3'UTR           | c.*877T>C               |
| 386    | C17orf58  | chr17      | ENSG00000186665 | Frame shift del | c.24del                 |
| 387    | C17orf58  | chr17      | ENSG00000186665 | Frame shift del | c.24del                 |
| 388    | C17orf67  | chr17      | ENSG00000214226 | Missense        | c.41T>C                 |
| 389    | C1D       | chr2       | ENSG00000197223 | 3'UTR           | c.*1375C>T              |
| 390    | C1orf112  | chr1       | ENSG00000000460 | 3'UTR           | c.*1025C>T              |
| 391    | C1orf21   | chr1       | ENSG00000116667 | 3'UTR           | c.*8743C>A              |
| 392    | C1orf21   | chr1       | ENSG00000116667 | 3'UTR           | c.*8750A>G              |
| 393    | C1orf226  | chr1       | ENSG00000239887 | 3'UTR           | c.*3057del              |
| 394    | C1orf229  | chr1       | ENSG00000221953 | RNA             | n.1834del               |
| 395    | C1QTNF6   | chr22      | ENSG00000133466 | 3'UTR           | c.*1706T>C              |
| 396    | C1QTNF9   | chr13      | ENSG00000240654 | 3'UTR           | c.*400A>G               |
| 397    | C22orf23  | chr22      | ENSG00000128346 | 3'UTR           | c.*478A>G               |
| 398    | C2CD3     | chr11      | ENSG00000168014 | Missense        | c.4933A>G               |
| 399    | C2CD4D    | chr1       | ENSG00000225556 | Intron          | c.-231-72T>C            |
| 400    | C2CD6     | chr2       | ENSG00000155754 | Intron          | c.640-26T>C             |
| 401    | C2orf42   | chr2       | ENSG00000115998 | Missense        | c.949A>C                |
| 402    | C2orf68   | chr2       | ENSG00000168887 | 3'UTR           | c.*313A>G               |
| 403    | C2orf69   | chr2       | ENSG00000178074 | 3'UTR           | c.*1271T>A              |
| 404    | C3orf14   | chr3       | ENSG00000114405 | 3'UTR           | c.*415del               |
| 405    | C3orf14   | chr3       | ENSG00000114405 | 3'UTR           | c.*858del               |
| 406    | C3orf20   | chr3       | ENSG00000131379 | Frame shift del | c.2367del               |
| 407    | C3orf20   | chr3       | ENSG00000131379 | Frame shift del | c.2367del               |
| 408    | C3P1      | chr19      | ENSG00000167798 | Intron          | n.1342+42A>G            |
| 409    | C4orf19   | chr4       | ENSG00000154274 | 3'UTR           | c.*312C>A               |
| 410    | C4orf54   | chr4       | ENSG00000248713 | Frame shift del | c.4640del               |
| 411    | C4orf54   | chr4       | ENSG00000248713 | Frame shift del | c.4640del               |
| 412    | C5        | chr9       | ENSG00000106804 | Intron          | c.4589-39T>C            |
| 413    | C5orf15   | chr5       | ENSG00000113583 | Missense        | c.201T>A                |
| 414    | C5orf51   | chr5       | ENSG00000205765 | 3'UTR           | c.*4147del              |
| 415    | C5orf67   | chr5       | ENSG00000225940 | Intron          | c.32+37A>G              |
| 416    | C7        | chr5       | ENSG00000112936 | Missense        | c.2512T>C               |
| 417    | C7orf31   | chr7       | ENSG00000153790 | Intron          | c.684+107G>A            |
| 418    | C8orf34   | chr8       | ENSG00000165084 | Intron          | c.1277-70del            |
| 419    | C8orf37   | chr8       | ENSG00000156172 | Intron          | c.244-14dup             |
| 420    | C8orf82   | chr8       | ENSG00000213563 | Missense        | c.171A>G                |
| 421    | C9orf153  | chr9       | ENSG00000187753 | 3'UTR           | c.*316T>C               |
| 422    | C9orf170  | chr9       | ENSG00000204446 | RNA             | n.1072del               |



| Number | Gene name | Chromosome | Gene_ID         | Mutation        | Nucleotide substitution |
|--------|-----------|------------|-----------------|-----------------|-------------------------|
| 423    | C9orf64   | chr9       | ENSG00000165118 | 3'UTR           | c.*50T>C                |
| 424    | CA13      | chr8       | ENSG00000185015 | 3'UTR           | c.*2359T>C              |
| 425    | CA5B      | chrX       | ENSG00000169239 | 3'UTR           | c.*4243T>C              |
| 426    | CABIN1    | chr22      | ENSG00000099991 | Intron          | c.4747-8669A>G          |
| 427    | CABIN1    | chr22      | ENSG00000099991 | Silent          | c.5145A>G               |
| 428    | CABLES2   | chr20      | ENSG00000149679 | 3'UTR           | c.*913del               |
| 429    | CABP1     | chr12      | ENSG00000157782 | Frame shift del | c.110_146del            |
| 430    | CACNA1A   | chr19      | ENSG00000141837 | Intron          | c.4950+3644A>G          |
| 431    | CACNA1C   | chr12      | ENSG00000151067 | Intron          | c.50-66G>C              |
| 432    | CACNA1C   | chr12      | ENSG00000151067 | Intron          | c.1391-38C>T            |
| 433    | CACNA1D   | chr3       | ENSG00000157388 | Splice region   | c.377+13del             |
| 434    | CACNA1H   | chr16      | ENSG00000196557 | Intron          | c.4476+28G>T            |
| 435    | CACNB1    | chr17      | ENSG00000067191 | 3'UTR           | c.*629T>C               |
| 436    | CACNB1    | chr17      | ENSG00000067191 | Splice region   | c.784-3dup              |
| 437    | CACNB4    | chr2       | ENSG00000182389 | Missense        | c.1144A>T               |
| 438    | CACNB4    | chr2       | ENSG00000182389 | Intron          | c.268-28A>C             |
| 439    | CADM1     | chr11      | ENSG00000182985 | 3'UTR           | c.*949del               |
| 440    | CADM1     | chr11      | ENSG00000182985 | Intron          | c.1079-56del            |
| 441    | CADM3     | chr1       | ENSG00000162706 | Silent          | c.63C>A                 |
| 442    | CADM3     | chr1       | ENSG00000162706 | Intron          | c.623-39C>G             |
| 443    | CALCOCO1  | chr12      | ENSG00000012822 | Missense        | c.494A>G                |
| 444    | CALCOCO1  | chr12      | ENSG00000012822 | Silent          | c.180T>C                |
| 445    | CALHM1    | chr10      | ENSG00000185933 | Silent          | c.261C>T                |
| 446    | CALHM3    | chr10      | ENSG00000183128 | 5'Flank         |                         |
| 447    | CALN1     | chr7       | ENSG00000183166 | 3'UTR           | c.*7077del              |
| 448    | CAMK2N1   | chr1       | ENSG00000162545 | 3'UTR           | c.*1115dup              |
| 449    | CAMK4     | chr5       | ENSG00000152495 | 3'UTR           | c.*6978del              |
| 450    | CAMKV     | chr3       | ENSG00000164076 | 3'UTR           | c.*1273C>T              |
| 451    | CAMTA1    | chr1       | ENSG00000171735 | Missense        | c.4529A>G               |
| 452    | CAPN1     | chr11      | ENSG00000014216 | 3'UTR           | c.*260T>G               |
| 453    | CAPN10    | chr2       | ENSG00000142330 | Frame shift del | c.1326del               |
| 454    | CAPN10    | chr2       | ENSG00000142330 | Frame shift del | c.1326del               |
| 455    | CAPN2     | chr1       | ENSG00000162909 | 5'UTR           | c.-133del               |
| 456    | CAPN2     | chr1       | ENSG00000162909 | Missense        | c.2050A>G               |
| 457    | CAPN8     | chr1       | ENSG00000203697 | Intron          | c.1700-109C>T           |
| 458    | CAPRIN2   | chr12      | ENSG00000110888 | Intron          | c.421-20T>C             |
| 459    | CAPZB     | chr1       | ENSG00000077549 | 3'UTR           | c.*713A>G               |
| 460    | CAPZB     | chr1       | ENSG00000077549 | Intron          | c.330-23G>A             |
| 461    | CARD11    | chr7       | ENSG00000198286 | Intron          | c.2607+79del            |
| 462    | CARF      | chr2       | ENSG00000138380 | 3'UTR           | c.*1228del              |
| 463    | CARF      | chr2       | ENSG00000138380 | Frame shift del | c.669del                |
| 464    | CARF      | chr2       | ENSG00000138380 | Frame shift del | c.669del                |
| 465    | CARMIL2   | chr16      | ENSG00000159753 | 5'UTR           | c.-51C>T                |
| 466    | CASKIN2   | chr17      | ENSG00000177303 | Missense        | c.2651C>T               |
| 467    | CASP2     | chr7       | ENSG00000106144 | 3'UTR           | c.*1498_1499del         |
| 468    | CASP3     | chr4       | ENSG00000164305 | Missense        | c.590A>G                |
| 469    | CASR      | chr3       | ENSG00000036828 | 5'UTR           | c.-158G>T               |
| 470    | CASS4     | chr20      | ENSG00000087589 | 5'UTR           | c.-38A>G                |
| 471    | CASTOR2   | chr7       | ENSG00000274070 | Missense        | c.383G>A                |
| 472    | CASZ1     | chr1       | ENSG00000130940 | 3'UTR           | c.*2124del              |
| 473    | CATSPERG  | chr19      | ENSG00000099338 | Intron          | c.998-19C>T             |
| 474    | CAV1      | chr7       | ENSG00000105974 | 5'Flank         |                         |
| 475    | CAV1      | chr7       | ENSG00000105974 | 3'UTR           | c.*22T>C                |

| Number | Gene name | Chromosome | Gene_ID         | Mutation     | Nucleotide substitution |
|--------|-----------|------------|-----------------|--------------|-------------------------|
| 476    | CBFA2T2   | chr20      | ENSG00000078699 | 3'UTR        | c.*510C>T               |
| 477    | CBLL1     | chr7       | ENSG00000105879 | 3'UTR        | c.*281dup               |
| 478    | CBLN4     | chr20      | ENSG00000054803 | 3'UTR        | c.*856 *857del          |
| 479    | CBR4      | chr4       | ENSG00000145439 | 3'UTR        | c.*235del               |
| 480    | CBWD1     | chr9       | ENSG00000172785 | Missense     | c.706T>C                |
| 481    | CBX1      | chr17      | ENSG00000108468 | 3'UTR        | c.*584del               |
| 482    | CC2D1A    | chr19      | ENSG00000132024 | Silent       | c.1326A>C               |
| 483    | CC2D1B    | chr1       | ENSG00000154222 | Intron       | c.2430+231A>G           |
| 484    | CCAR2     | chr8       | ENSG00000158941 | 3'UTR        | c.*566T>C               |
| 485    | CCDC110   | chr4       | ENSG00000168491 | Missense     | c.1510T>C               |
| 486    | CCDC117   | chr22      | ENSG00000159873 | 3'UTR        | c.*1445A>G              |
| 487    | CCDC144NL | chr17      | ENSG00000205212 | Missense     | c.269C>T                |
| 488    | CCDC148   | chr2       | ENSG00000153237 | 3'UTR        | c.*938A>T               |
| 489    | CCDC171   | chr9       | ENSG00000164989 | Intron       | c.353-3808del           |
| 490    | CCDC25    | chr8       | ENSG00000147419 | 3'UTR        | c.*1676del              |
| 491    | CCDC30    | chr1       | ENSG00000186409 | Intron       | c.385-8981A>G           |
| 492    | CCDC40    | chr17      | ENSG00000141519 | Silent       | c.2991A>G               |
| 493    | CCDC68    | chr18      | ENSG00000166510 | 3'UTR        | c.*1540del              |
| 494    | CCDC71    | chr3       | ENSG00000177352 | Missense     | c.463C>T                |
| 495    | CCDC73    | chr11      | ENSG00000186714 | 3'UTR        | c.*1713T>C              |
| 496    | CCDC85C   | chr14      | ENSG00000205476 | 3'UTR        | c.*2817del              |
| 497    | CCDC85C   | chr14      | ENSG00000205476 | In Frame Del | c.1138 1140del          |
| 498    | CCDC88A   | chr2       | ENSG00000115355 | Intron       | c.3603-9del             |
| 499    | CCDC88C   | chr14      | ENSG00000015133 | 3'UTR        | c.*422G>C               |
| 500    | CCDC89    | chr11      | ENSG00000179071 | 3'UTR        | c.*489del               |
| 501    | CCKBR     | chr11      | ENSG00000110148 | 5'Flank      |                         |
| 502    | CCKBR     | chr11      | ENSG00000110148 | Missense     | c.265A>G                |
| 503    | CCL22     | chr16      | ENSG00000102962 | 3'UTR        | c.*1232del              |
| 504    | CCN2      | chr6       | ENSG00000118523 | Missense     | c.835T>C                |
| 505    | CCNB1     | chr5       | ENSG00000134057 | Intron       | c.1194+44A>G            |
| 506    | CCND2     | chr12      | ENSG00000118971 | 3'UTR        | c.*3519dup              |
| 507    | CCNE2     | chr8       | ENSG00000175305 | 3'UTR        | c.*867del               |
| 508    | CCNI2     | chr5       | ENSG00000205089 | Missense     | c.460G>A                |
| 509    | CCT8      | chr21      | ENSG00000156261 | Intron       | c.60+1520del            |
| 510    | CD163L1   | chr12      | ENSG00000177675 | Intron       | c.124+1934A>G           |
| 511    | CD1D      | chr1       | ENSG00000158473 | Missense     | c.128G>A                |
| 512    | CD300E    | chr17      | ENSG00000186407 | 3'UTR        | c.*2702del              |
| 513    | CD37      | chr19      | ENSG00000104894 | Silent       | c.390C>T                |
| 514    | CD3G      | chr11      | ENSG00000160654 | Intron       | c.172-13C>T             |
| 515    | CD44      | chr11      | ENSG00000026508 | 3'UTR        | c.*331C>A               |
| 516    | CD59      | chr11      | ENSG00000085063 | Missense     | c.251A>G                |
| 517    | CD6       | chr11      | ENSG00000013725 | Missense     | c.521T>G                |
| 518    | CD96      | chr3       | ENSG00000153283 | Silent       | c.349C>T                |
| 519    | CDC123    | chr10      | ENSG00000151465 | Intron       | c.565+259T>C            |
| 520    | CDC14B    | chr9       | ENSG00000081377 | Intron       | c.1344-11del            |
| 521    | CDC25A    | chr3       | ENSG00000164045 | 3'UTR        | c.*582del               |
| 522    | CDC27     | chr17      | ENSG00000004897 | Missense     | c.1937A>G               |
| 523    | CDC42     | chr1       | ENSG00000070831 | Missense     | c.169A>G                |
| 524    | CDC42     | chr1       | ENSG00000070831 | 3'UTR        | c.*1459G>A              |
| 525    | CDC42BPB  | chr14      | ENSG00000198752 | Silent       | c.5064A>G               |
| 526    | CDC42BPG  | chr11      | ENSG00000171219 | Intron       | c.4513+38del            |
| 527    | CDC5L     | chr6       | ENSG00000096401 | 3'UTR        | c.*3700del              |
| 528    | CDC7      | chr1       | ENSG00000097046 | 3'UTR        | c.*1278del              |

| Number | Gene name | Chromosome | Gene_ID         | Mutation        | Nucleotide substitution  |
|--------|-----------|------------|-----------------|-----------------|--------------------------|
| 529    | CDC73     | chr1       | ENSG00000134371 | 3'UTR           | c.*1144del               |
| 530    | CDCA5     | chr11      | ENSG00000146670 | Intron          | c.269+34 269+35del       |
| 531    | CDH15     | chr16      | ENSG00000129910 | Missense        | c.1460C>T                |
| 532    | CDH19     | chr18      | ENSG00000071991 | Missense        | c.2077G>A                |
| 533    | CDH2      | chr18      | ENSG00000170558 | Missense        | c.79G>T                  |
| 534    | CDH20     | chr18      | ENSG00000101542 | Intron          | c.830-39C>T              |
| 535    | CDH24     | chr14      | ENSG00000139880 | Intron          | c.1363+29A>G             |
| 536    | CDH4      | chr20      | ENSG00000179242 | Intron          | c.-53-24204G>A           |
| 537    | CDHR1     | chr10      | ENSG00000148600 | Missense        | c.2138A>G                |
| 538    | CDHR2     | chr5       | ENSG00000074276 | Missense        | c.1637T>C                |
| 539    | CDHR4     | chr3       | ENSG00000187492 | Missense        | c.421C>T                 |
| 540    | CDK15     | chr2       | ENSG00000138395 | 3'UTR           | c.*631C>T                |
| 541    | CDK16     | chrX       | ENSG00000102225 | 3'UTR           | c.*507 *508del           |
| 542    | CDK4      | chr12      | ENSG00000135446 | 5'UTR           | c.-99del                 |
| 543    | CDK5RAP2  | chr9       | ENSG00000136861 | Intron          | c.508-58T>C              |
| 544    | CDK6      | chr7       | ENSG00000105810 | 3'UTR           | c.*9369del               |
| 545    | CDK9      | chr9       | ENSG00000136807 | 3'UTR           | c.*980del                |
| 546    | CDKN2AIP  | chr4       | ENSG00000168564 | Missense        | c.1709C>A                |
| 547    | CDKN2AIP  | chr4       | ENSG00000168564 | 3'UTR           | c.*1424T>C               |
| 548    | CDKN2B    | chr9       | ENSG00000147883 | 3'UTR           | c.*766T>C                |
| 549    | CDKN3     | chr14      | ENSG00000100526 | Intron          | c.148+639A>G             |
| 550    | CDV3      | chr3       | ENSG00000091527 | 3'UTR           | c.*46 *49del             |
| 551    | CDV3      | chr3       | ENSG00000091527 | 3'UTR           | c.*647dup                |
| 552    | CDV3      | chr3       | ENSG00000091527 | 3'UTR           | c.*1640C>T               |
| 553    | CDX2      | chr13      | ENSG00000165556 | 5'Flank         |                          |
| 554    | CEACAM20  | chr19      | ENSG00000273777 | Intron          | c.1428-47T>C             |
| 555    | CELF2     | chr10      | ENSG00000048740 | Intron          | c.1015+3064 1015+3065del |
| 556    | CELF2     | chr10      | ENSG00000048740 | 3'UTR           | c.*4914T>C               |
| 557    | CELSR1    | chr22      | ENSG00000075275 | Intron          | c.5413-96T>C             |
| 558    | CELSR1    | chr22      | ENSG00000075275 | Frame shift Ins | c.175dup                 |
| 559    | CELSR2    | chr1       | ENSG00000143126 | Silent          | c.822A>C                 |
| 560    | CELSR3    | chr3       | ENSG00000008300 | Missense        | c.8501C>T                |
| 561    | CELSR3    | chr3       | ENSG00000008300 | Missense        | c.6175T>C                |
| 562    | CELSR3    | chr3       | ENSG00000008300 | Missense        | c.4070A>G                |
| 563    | CEMP1     | chr15      | ENSG00000103888 | Missense        | c.3296G>A                |
| 564    | CENPS     | chr1       | ENSG00000175279 | Silent          | c.153G>A                 |
| 565    | CENPV     | chr17      | ENSG00000166582 | Intron          | c.580-23A>G              |
| 566    | CEP126    | chr11      | ENSG00000110318 | 3'UTR           | c.*3064 *3065del         |
| 567    | CEP164    | chr11      | ENSG00000110274 | 3'UTR           | c.*1094del               |
| 568    | CEP192    | chr18      | ENSG00000101639 | Intron          | c.3333+29A>T             |
| 569    | CEP290    | chr12      | ENSG00000198707 | Intron          | c.1065+15G>A             |
| 570    | CEP295    | chr11      | ENSG00000166004 | Intron          | c.5597-10del             |
| 571    | CEP350    | chr1       | ENSG00000135837 | 3'UTR           | c.*2094del               |
| 572    | CEP41     | chr7       | ENSG00000106477 | Splice region   | c.33+4A>G                |
| 573    | CEP70     | chr3       | ENSG00000114107 | Missense        | c.1324T>A                |
| 574    | CEP78     | chr9       | ENSG00000148019 | 5'UTR           | c.-251A>G                |
| 575    | CEP78     | chr9       | ENSG00000148019 | 3'UTR           | c.*8173G>T               |
| 576    | CEP85L    | chr6       | ENSG00000111860 | 3'UTR           | c.*3995del               |
| 577    | CERS6     | chr2       | ENSG00000172292 | 3'UTR           | c.*4992del               |
| 578    | CES3      | chr16      | ENSG00000172828 | 3'UTR           | c.*489 *492del           |
| 579    | CES4A     | chr16      | ENSG00000172824 | 3'UTR           | c.*560G>T                |
| 580    | CETN3     | chr5       | ENSG00000153140 | 3'UTR           | c.*270del                |
| 581    | CFAP221   | chr2       | ENSG00000163075 | Missense        | c.893C>G                 |

| Number | Gene name | Chromosome | Gene_ID         | Mutation        | Nucleotide substitution |
|--------|-----------|------------|-----------------|-----------------|-------------------------|
| 582    | CFAP44    | chr3       | ENSG00000206530 | 3'UTR           | c.*1367del              |
| 583    | CFAP47    | chrX       | ENSG00000165164 | 3'UTR           | c.*330T>C               |
| 584    | CFHR3     | chr1       | ENSG00000116785 | 3'UTR           | c.*22del                |
| 585    | CFHR5     | chr1       | ENSG00000134389 | Silent          | c.732C>T                |
| 586    | CFL2      | chr14      | ENSG00000165410 | 3'UTR           | c.*2330A>G              |
| 587    | CGAS      | chr6       | ENSG00000164430 | Frame shift Ins | c.1284dup               |
| 588    | CGAS      | chr6       | ENSG00000164430 | Missense        | c.1244A>G               |
| 589    | CGN       | chr1       | ENSG00000143375 | Intron          | c.1045-33T>C            |
| 590    | CGREF1    | chr2       | ENSG00000138028 | Silent          | c.63A>G                 |
| 591    | CHAD      | chr17      | ENSG00000136457 | Silent          | c.516C>T                |
| 592    | CHAT      | chr10      | ENSG00000070748 | Missense        | c.349C>T                |
| 593    | CHCHD1    | chr10      | ENSG00000172586 | 3'UTR           | c.*268del               |
| 594    | CHCHD1    | chr10      | ENSG00000172586 | 3'UTR           | c.*273A>T               |
| 595    | CHD1      | chr5       | ENSG00000153922 | Missense        | c.973T>C                |
| 596    | CHD2      | chr15      | ENSG00000173575 | 3'UTR           | c.*1684T>C              |
| 597    | CHD2      | chr15      | ENSG00000173575 | 3'UTR           | c.*186T>C               |
| 598    | CHEK2     | chr22      | ENSG00000183765 | Silent          | c.240T>C                |
| 599    | CHERP     | chr19      | ENSG00000085872 | Missense        | c.2723A>G               |
| 600    | CHERP     | chr19      | ENSG00000085872 | Silent          | c.222G>A                |
| 601    | CHMP7     | chr8       | ENSG00000147457 | Frame shift del | c.968_974del            |
| 602    | CHMP7     | chr8       | ENSG00000147457 | Frame shift del | c.968_974del            |
| 603    | CHN2      | chr7       | ENSG00000106069 | Silent          | c.1389C>T               |
| 604    | CHRAC1    | chr8       | ENSG00000104472 | 3'UTR           | c.*314C>T               |
| 605    | CHRNA1    | chr2       | ENSG00000138435 | Intron          | c.853+750del            |
| 606    | CHRNA1    | chr2       | ENSG00000138435 | 3'UTR           |                         |
| 607    | CHRNA2    | chr8       | ENSG00000120903 | Missense        | c.1205T>A               |
| 608    | CHST15    | chr10      | ENSG00000182022 | 3'UTR           | c.*1925del              |
| 609    | CHST2     | chr3       | ENSG00000175040 | Splice region   | c.-172T>C               |
| 610    | CHST3     | chr10      | ENSG00000122863 | Missense        | c.239T>C                |
| 611    | CHST5     | chr16      | ENSG00000135702 | 5'UTR           | c.-188A>G               |
| 612    | CHSY3     | chr5       | ENSG00000198108 | 5'UTR           | c.-302_-300del          |
| 613    | CIC       | chr19      | ENSG00000079432 | Missense        | c.1621T>C               |
| 614    | CILP2     | chr19      | ENSG00000160161 | Intron          | c.65-100_65-99delinsGG  |
| 615    | CILP2     | chr19      | ENSG00000160161 | Missense        | c.1964A>G               |
| 616    | CIRBP     | chr19      | ENSG00000099622 | Missense        | c.665G>A                |
| 617    | CIT       | chr12      | ENSG00000122966 | Missense        | c.2102G>A               |
| 618    | CIZ1      | chr9       | ENSG00000148337 | Missense        | c.2066A>G               |
| 619    | CKAP2L    | chr2       | ENSG00000169607 | Intron          | c.1758+9C>T             |
| 620    | CKB       | chr14      | ENSG00000166165 | Intron          | c.348+25_349-35del      |
| 621    | CLCA2     | chr1       | ENSG00000137975 | Intron          | c.1488+24T>C            |
| 622    | CLCA4     | chr1       | ENSG00000016602 | Intron          | c.300+10G>A             |
| 623    | CLCC1     | chr1       | ENSG00000121940 | Splice site     | c.-11-1G>A              |
| 624    | CLCN2     | chr3       | ENSG00000114859 | Frame shift del | c.1142del               |
| 625    | CLCN2     | chr3       | ENSG00000114859 | Frame shift del | c.1142del               |
| 626    | CLCN3     | chr4       | ENSG00000109572 | 3'UTR           | c.*3498del              |
| 627    | CLCN4     | chrX       | ENSG00000073464 | 3'UTR           | c.*3151_*3152del        |
| 628    | CLCN5     | chrX       | ENSG00000171365 | Intron          | c.17-39078T>C           |
| 629    | CLCN5     | chrX       | ENSG00000171365 | 3'UTR           | c.*3109del              |
| 630    | CLDN19    | chr1       | ENSG00000164007 | Silent          | c.30C>T                 |
| 631    | CLEC10A   | chr17      | ENSG00000132514 | Missense        | c.646G>T                |
| 632    | CLEC3A    | chr16      | ENSG00000166509 | 3'UTR           | c.*604del               |
| 633    | CLIP3     | chr19      | ENSG00000105270 | Missense        | c.314G>A                |
| 634    | CLMN      | chr14      | ENSG00000165959 | Intron          | c.2769+58T>C            |

| Number | Gene name | Chromosome | Gene_ID         | Mutation        | Nucleotide substitution |
|--------|-----------|------------|-----------------|-----------------|-------------------------|
| 635    | CLOCK     | chr4       | ENSG00000134852 | 3'UTR           | c.*1717A>G              |
| 636    | CLPX      | chr15      | ENSG00000166855 | 3'UTR           | c.*2089del              |
| 637    | CLPX      | chr15      | ENSG00000166855 | Missense        | c.1330C>T               |
| 638    | CLSPN     | chr1       | ENSG00000092853 | Intron          | c.895+66T>A             |
| 639    | CLU       | chr8       | ENSG00000120885 | 3'UTR           | c.*1030T>C              |
| 640    | CLYBL     | chr13      | ENSG00000125246 | Missense        | c.727C>A                |
| 641    | CMPK2     | chr2       | ENSG00000134326 | Intron          | c.993-7621A>G           |
| 642    | CMSS1     | chr3       | ENSG00000184220 | Intron          | c.668-64del             |
| 643    | CMTM6     | chr3       | ENSG00000091317 | 3'UTR           | c.*2590dup              |
| 644    | CMYA5     | chr5       | ENSG00000164309 | Missense        | c.613A>G                |
| 645    | CNIH4     | chr1       | ENSG00000143771 | 3'UTR           | c.*2397A>G              |
| 646    | CNIH4     | chr1       | ENSG00000143771 | 3'UTR           | c.*2539del              |
| 647    | CNNM2     | chr10      | ENSG00000148842 | Silent          | c.987G>A                |
| 648    | CNNM3     | chr2       | ENSG00000168763 | 3'UTR           | c.*940del               |
| 649    | CNOT1     | chr16      | ENSG00000125107 | Missense        | c.3418A>G               |
| 650    | CNOT4     | chr7       | ENSG00000080802 | 3'UTR           | c.*1238 *1239dup        |
| 651    | CNOT6L    | chr4       | ENSG00000138767 | 3'UTR           | c.*2835 *2838del        |
| 652    | CNOT6L    | chr4       | ENSG00000138767 | 3'UTR           | c.*2733A>G              |
| 653    | CNOT6L    | chr4       | ENSG00000138767 | Intron          | c.1455+32T>A            |
| 654    | CNOT6L    | chr4       | ENSG00000138767 | Splice region   | c.315-9 315-7del        |
| 655    | CNOT9     | chr2       | ENSG00000144580 | 3'UTR           | c.*1486 *1487del        |
| 656    | CNST      | chr1       | ENSG00000162852 | Missense        | c.952C>A                |
| 657    | CNTLN     | chr9       | ENSG00000044459 | 3'UTR           | c.*208T>C               |
| 658    | CNTNAP1   | chr17      | ENSG00000108797 | Missense        | c.2128C>T               |
| 659    | CNTNAP5   | chr2       | ENSG00000155052 | Silent          | c.2007C>T               |
| 660    | COA6      | chr1       | ENSG00000168275 | 3'UTR           | c.*300A>G               |
| 661    | COBL      | chr7       | ENSG00000106078 | 3'UTR           | c.*1196del              |
| 662    | COCH      | chr14      | ENSG00000100473 | Missense        | c.247G>T                |
| 663    | COG6      | chr13      | ENSG00000133103 | 3'UTR           | c.*1980T>A              |
| 664    | COL10A1   | chr6       | ENSG00000123500 | 3'UTR           | c.*328del               |
| 665    | COL11A1   | chr1       | ENSG00000060718 | Frame shift del | c.4543del               |
| 666    | COL11A1   | chr1       | ENSG00000060718 | Frame shift del | c.4543del               |
| 667    | COL12A1   | chr6       | ENSG00000111799 | Intron          | c.9010+100 9010+101del  |
| 668    | COL12A1   | chr6       | ENSG00000111799 | Nonsense        | c.2611C>T               |
| 669    | COL16A1   | chr1       | ENSG00000084636 | Missense        | c.2584G>T               |
| 670    | COL17A1   | chr10      | ENSG00000065618 | Missense        | c.325T>C                |
| 671    | COL18A1   | chr21      | ENSG00000182871 | Frame shift del | c.2181del               |
| 672    | COL18A1   | chr21      | ENSG00000182871 | Frame shift del | c.2181del               |
| 673    | COL1A1    | chr17      | ENSG00000108821 | 3'UTR           | c.*1015T>C              |
| 674    | COL1A2    | chr7       | ENSG00000164692 | 3'UTR           | c.*238C>T               |
| 675    | COL22A1   | chr8       | ENSG00000169436 | 3'UTR           | c.*668A>C               |
| 676    | COL22A1   | chr8       | ENSG00000169436 | Intron          | c.3609+98T>C            |
| 677    | COL27A1   | chr9       | ENSG00000196739 | Splice region   | c.4260+8A>G             |
| 678    | COL27A1   | chr9       | ENSG00000196739 | Missense        | c.4811G>T               |
| 679    | COL3A1    | chr2       | ENSG00000168542 | Intron          | c.1347+41 del           |
| 680    | COL4A4    | chr2       | ENSG00000081052 | 3'UTR           | c.*2120del              |
| 681    | COL4A4    | chr2       | ENSG00000081052 | Splice region   | c.976-8G>A              |
| 682    | COL5A2    | chr2       | ENSG00000204262 | Missense        | c.1322G>T               |
| 683    | COL6A2    | chr21      | ENSG00000142173 | Intron          | c.1179+14C>T            |
| 684    | COL6A2    | chr21      | ENSG00000142173 | Intron          | c.1395+58del            |
| 685    | COL6A2    | chr21      | ENSG00000142173 | Intron          | c.1734+34del            |
| 686    | COL6A3    | chr2       | ENSG00000163359 | 3'UTR           | c.*665del               |
| 687    | COL8A1    | chr3       | ENSG00000144810 | Intron          | c.-3-81T>C              |

| Number | Gene name | Chromosome | Gene_ID         | Mutation        | Nucleotide substitution |
|--------|-----------|------------|-----------------|-----------------|-------------------------|
| 688    | COL9A3    | chr20      | ENSG00000092758 | Intron          | c.79-13 79-12del        |
| 689    | COMP      | chr19      | ENSG00000105664 | Intron          | c.390+52del             |
| 690    | COP1      | chr1       | ENSG00000143207 | 5'UTR           | c.-144del               |
| 691    | COPA      | chr1       | ENSG00000122218 | Missense        | c.3568G>A               |
| 692    | COPB2     | chr3       | ENSG00000184432 | Missense        | c.1888T>C               |
| 693    | COPG1     | chr3       | ENSG00000181789 | Intron          | c.2257-640del           |
| 694    | COPG2     | chr7       | ENSG00000158623 | Intron          | c.737+3113del           |
| 695    | COQ6      | chr14      | ENSG00000119723 | Intron          | c.164-11 164-10del      |
| 696    | CORO2A    | chr9       | ENSG00000106789 | 3'UTR           | c.*2052del              |
| 697    | CORO2A    | chr9       | ENSG00000106789 | 3'UTR           | c.*1377T>C              |
| 698    | COX6A1P2  | chr6       | ENSG00000226976 | RNA             | n.176T>C                |
| 699    | CPA5      | chr7       | ENSG00000158525 | Intron          | c.432+76T>C             |
| 700    | CPA5      | chr7       | ENSG00000158525 | Silent          | c.627T>C                |
| 701    | CPAMD8    | chr19      | ENSG00000160111 | Intron          | c.505-145del            |
| 702    | CPEB2     | chr4       | ENSG00000137449 | Intron          | c.1944+857T>C           |
| 703    | CPEB2     | chr4       | ENSG00000137449 | 3'UTR           | c.*2972del              |
| 704    | CPED1     | chr7       | ENSG00000106034 | Intron          | c.249+4044G>C           |
| 705    | CPNE3     | chr8       | ENSG00000085719 | Missense        | c.140G>A                |
| 706    | CPNE3     | chr8       | ENSG00000085719 | 3'UTR           | c.*1026del              |
| 707    | CPNE7     | chr16      | ENSG00000178773 | Missense        | c.457T>C                |
| 708    | CPOX      | chr3       | ENSG00000080819 | Intron          | c.1277+52C>A            |
| 709    | CPSF1     | chr8       | ENSG00000071894 | Frame shift del | c.884del                |
| 710    | CPSF1     | chr8       | ENSG00000071894 | Frame shift del | c.884del                |
| 711    | CPSF7     | chr11      | ENSG00000149532 | Intron          | c.680-738A>G            |
| 712    | CPTP      | chr1       | ENSG00000224051 | Missense        | c.337C>T                |
| 713    | CPXM2     | chr10      | ENSG00000121898 | 3'UTR           | c.*1106del              |
| 714    | CR1       | chr1       | ENSG00000203710 | Missense        | c.4567G>A               |
| 715    | CR1       | chr1       | ENSG00000203710 | 3'UTR           | c.*727del               |
| 716    | CRACR2B   | chr11      | ENSG00000177685 | Missense        | c.896A>G                |
| 717    | CRAT      | chr9       | ENSG00000095321 | Silent          | c.348A>G                |
| 718    | CRB1      | chr1       | ENSG00000134376 | 3'UTR           | c.*2829G>A              |
| 719    | CRB1      | chr1       | ENSG00000134376 | 3'UTR           | c.*4460A>G              |
| 720    | CRB1      | chr1       | ENSG00000134376 | 3'UTR           | c.*463A>G               |
| 721    | CREB3L2   | chr7       | ENSG00000182158 | 3'UTR           | c.*3294del              |
| 722    | CREBRF    | chr5       | ENSG00000164463 | 3'UTR           | c.*4857A>G              |
| 723    | CREBRF    | chr5       | ENSG00000164463 | 3'UTR           | c.*4971del              |
| 724    | CREBRF    | chr5       | ENSG00000164463 | 3'UTR           | c.*5263 *5264del        |
| 725    | CREG2     | chr2       | ENSG00000175874 | 3'UTR           | c.*326 *327del          |
| 726    | CRELD1    | chr3       | ENSG00000163703 | Missense        | c.610C>T                |
| 727    | CRIM1     | chr2       | ENSG00000150938 | 3'UTR           | c.*1365T>C              |
| 728    | CRIPAK    | chr4       | ENSG00000288380 | 5'UTR           | c.-1322del              |
| 729    | CROCC     | chr1       | ENSG00000058453 | 5'UTR           | c.-1del                 |
| 730    | CRY1      | chr12      | ENSG00000008405 | Missense        | c.1042C>T               |
| 731    | CRYAA     | chr21      | ENSG00000160202 | Frame shift del | c.96 97del              |
| 732    | CRYBG1    | chr6       | ENSG00000112297 | Missense        | c.641T>C                |
| 733    | CRYZ      | chr1       | ENSG00000116791 | 3'UTR           | c.*359C>A               |
| 734    | CSAD      | chr12      | ENSG00000139631 | Intron          | c.648+125G>A            |
| 735    | CSAD      | chr12      | ENSG00000139631 | Missense        | c.542T>C                |
| 736    | CSMD1     | chr8       | ENSG00000183117 | Splice region   | c.6819-7del             |
| 737    | CSMD1     | chr8       | ENSG00000183117 | Intron          | c.4166+36T>C            |
| 738    | CSMD1     | chr8       | ENSG00000183117 | Missense        | c.254G>T                |
| 739    | CSMD2     | chr1       | ENSG00000121904 | Missense        | c.97G>A                 |
| 740    | CSMD3     | chr8       | ENSG00000164796 | Missense        | c.4721G>A               |

| Number | Gene name   | Chromosome | Gene_ID         | Mutation        | Nucleotide substitution |
|--------|-------------|------------|-----------------|-----------------|-------------------------|
| 741    | CSNK1A1     | chr5       | ENSG00000113712 | 3'UTR           | c.*2983 *2984del        |
| 742    | CSNK1G1     | chr15      | ENSG00000169118 | 3'UTR           | c.*4834A>G              |
| 743    | CSNK1G2     | chr19      | ENSG00000133275 | Intron          | c.448-6del              |
| 744    | CSNK1G3     | chr5       | ENSG00000151292 | 3'UTR           | c.*1610del              |
| 745    | CSPP1       | chr8       | ENSG00000104218 | Intron          | c.207+447del            |
| 746    | CSPP1       | chr8       | ENSG00000104218 | Missense        | c.3037C>G               |
| 747    | CTAGE9      | chr6       | ENSG00000236761 | Missense        | c.522A>G                |
| 748    | CTDSPL      | chr3       | ENSG00000144677 | 3'UTR           | c.*3106del              |
| 749    | CTDSPL2     | chr15      | ENSG00000137770 | 3'UTR           | c.*1811dup              |
| 750    | CTNNA2      | chr2       | ENSG00000066032 | Missense        | c.1422G>T               |
| 751    | CTR9        | chr11      | ENSG00000198730 | 5'UTR           | c.-72G>T                |
| 752    | CTR9        | chr11      | ENSG00000198730 | Missense        | c.3359A>G               |
| 753    | CTRL        | chr16      | ENSG00000141086 | Intron          | c.319-59A>G             |
| 754    | CTTNBP2     | chr7       | ENSG00000077063 | Intron          | c.2272+11C>T            |
| 755    | CTTNBP2NL   | chr1       | ENSG00000143079 | 3'UTR           | c.*2165del              |
| 756    | CUBN        | chr10      | ENSG00000107611 | Silent          | c.10251T>C              |
| 757    | CUL1        | chr7       | ENSG00000055130 | Intron          | c.1480-39del            |
| 758    | CUL7        | chr6       | ENSG00000044090 | Intron          | c.2398-25 2398-24insA   |
| 759    | CUX1        | chr7       | ENSG00000257923 | Intron          | c.141+16437A>C          |
| 760    | CWC22       | chr2       | ENSG00000163510 | Intron          | c.1459-10del            |
| 761    | CWC22       | chr2       | ENSG00000163510 | Splice region   | c.1148-3del             |
| 762    | CXCL12      | chr10      | ENSG00000107562 | 3'UTR           | c.*1236del              |
| 763    | CXCL5       | chr4       | ENSG00000163735 | 3'UTR           | c.*758T>C               |
| 764    | CXorf58     | chrX       | ENSG00000165182 | 3'UTR           | c.*100del               |
| 765    | CYBRD1      | chr2       | ENSG00000071967 | 5'UTR           | c.-69A>G                |
| 766    | CYHR1       | chr8       | ENSG00000187954 | Intron          | c.247-3852G>T           |
| 767    | CYP1A2      | chr15      | ENSG00000140505 | Missense        | c.1459G>A               |
| 768    | CYP2B7P     | chr19      | ENSG00000256612 | Splice region   | n.389-4G>A              |
| 769    | CYP3A7      | chr7       | ENSG00000160870 | Missense        | c.539G>A                |
| 770    | P3A7-CYP3A7 | chr7       | ENSG00000282301 | Frame shift del | c.1566del               |
| 771    | CYP4B1      | chr1       | ENSG00000142973 | Silent          | c.969T>C                |
| 772    | CYP4F12     | chr19      | ENSG00000186204 | 3'UTR           | c.*27dup                |
| 773    | CYS1        | chr2       | ENSG00000205795 | Frame shift del | c.66del                 |
| 774    | CYS1        | chr2       | ENSG00000205795 | Frame shift del | c.66del                 |
| 775    | CYTH1       | chr17      | ENSG00000108669 | 3'UTR           | c.*408del               |
| 776    | CYYR1       | chr21      | ENSG00000166265 | Intron          | c.176+1417del           |
| 777    | CYYR1       | chr21      | ENSG00000166265 | Missense        | c.22G>A                 |
| 778    | DAAM2       | chr6       | ENSG00000146122 | 3'UTR           | c.*2779dup              |
| 779    | DACT2       | chr6       | ENSG00000164488 | Missense        | c.1859G>A               |
| 780    | DAGLA       | chr11      | ENSG00000134780 | Missense        | c.1264C>T               |
| 781    | DAGLB       | chr7       | ENSG00000164535 | Missense        | c.1888C>T               |
| 782    | DBF4B       | chr17      | ENSG00000161692 | Intron          | c.1190-203del           |
| 783    | DBP         | chr19      | ENSG00000105516 | 3'UTR           | c.*166del               |
| 784    | DBX2        | chr12      | ENSG00000185610 | 3'UTR           | c.*1442G>A              |
| 785    | DCAF1       | chr3       | ENSG00000145041 | Silent          | c.1896T>C               |
| 786    | DCAF10      | chr9       | ENSG00000122741 | Intron          | c.135-4344T>G           |
| 787    | DCAF8L1     | chrX       | ENSG00000226372 | Missense        | c.945C>A                |
| 788    | DCHS1       | chr11      | ENSG00000166341 | Missense        | c.2597G>A               |
| 789    | DCLK1       | chr13      | ENSG00000133083 | 3'UTR           | c.*1966del              |
| 790    | DCP2        | chr5       | ENSG00000172795 | 3'UTR           | c.*478G>A               |
| 791    | DCP2        | chr5       | ENSG00000172795 | 3'UTR           | c.*1888del              |
| 792    | DCTN1       | chr2       | ENSG00000204843 | 3'UTR           | c.*170G>A               |
| 793    | DCTN1       | chr2       | ENSG00000204843 | Intron          | c.2316+48T>C            |

| Number | Gene name | Chromosome | Gene_ID         | Mutation        | Nucleotide substitution |
|--------|-----------|------------|-----------------|-----------------|-------------------------|
| 794    | DCTN6     | chr8       | ENSG00000104671 | 3'UTR           | c.*4del                 |
| 795    | DCUN1D1   | chr3       | ENSG00000043093 | 3'UTR           | c.*2444G>C              |
| 796    | DDAH1     | chr1       | ENSG00000153904 | 3'UTR           | c.*1675del              |
| 797    | DDB1      | chr11      | ENSG00000167986 | Missense        | c.3146A>G               |
| 798    | DDB1      | chr11      | ENSG00000167986 | Intron          | c.922-262T>C            |
| 799    | DDB1      | chr11      | ENSG00000167986 | Intron          | c.922-327dup            |
| 800    | DDB2      | chr11      | ENSG00000134574 | Intron          | c.457-3058del           |
| 801    | DDHD2     | chr8       | ENSG00000085788 | 5'UTR           | c.-709A>G               |
| 802    | DDI1      | chr11      | ENSG00000170967 | Missense        | c.352C>T                |
| 803    | DDR2      | chr1       | ENSG00000162733 | 3'UTR           | c.*225G>C               |
| 804    | DDX1      | chr2       | ENSG00000079785 | Missense        | c.1253T>C               |
| 805    | DDX20     | chr1       | ENSG00000064703 | Silent          | c.513A>G                |
| 806    | DDX23     | chr12      | ENSG00000174243 | Intron          | c.1803+20C>T            |
| 807    | DDX3X     | chrX       | ENSG00000215301 | Missense        | c.1124G>A               |
| 808    | DDX46     | chr5       | ENSG00000145833 | 3'UTR           | c.*1477 *1478del        |
| 809    | DDX58     | chr9       | ENSG00000107201 | Intron          | c.767-222A>G            |
| 810    | DDX60L    | chr4       | ENSG00000181381 | Missense        | c.477C>A                |
| 811    | DEGS1     | chr1       | ENSG00000143753 | 3'UTR           | c.*869A>G               |
| 812    | DENND1B   | chr1       | ENSG00000213047 | Intron          | c.-160+49del            |
| 813    | DENND5A   | chr11      | ENSG00000184014 | Missense        | c.3710T>C               |
| 814    | DENND5A   | chr11      | ENSG00000184014 | Intron          | c.182-319del            |
| 815    | DENND5B   | chr12      | ENSG00000170456 | 3'UTR           | c.*2898A>G              |
| 816    | DENND5B   | chr12      | ENSG00000170456 | Missense        | c.667A>G                |
| 817    | DENND6A   | chr3       | ENSG00000174839 | 3'UTR           | c.*2573del              |
| 818    | DENR      | chr12      | ENSG00000139726 | 3'UTR           | c.*1479A>G              |
| 819    | DEPDC5    | chr22      | ENSG00000100150 | Intron          | c.2105-4368del          |
| 820    | DERL1     | chr8       | ENSG00000136986 | 3'UTR           | c.*486G>A               |
| 821    | DERL1     | chr8       | ENSG00000136986 | Intron          | c.617+50A>G             |
| 822    | DERL2     | chr17      | ENSG00000072849 | 5'Flank         |                         |
| 823    | DESII     | chr22      | ENSG00000100418 | 3'UTR           | c.*2961A>G              |
| 824    | DFFA      | chr1       | ENSG00000160049 | 3'UTR           | c.*1758T>A              |
| 825    | DFFA      | chr1       | ENSG00000160049 | 3'UTR           | c.*1602del              |
| 826    | DFFA      | chr1       | ENSG00000160049 | 3'UTR           | c.*1227del              |
| 827    | DFFB      | chr1       | ENSG00000169598 | Silent          | c.475C>A                |
| 828    | DGAT1     | chr8       | ENSG00000185000 | Missense        | c.1078T>C               |
| 829    | DGKB      | chr7       | ENSG00000136267 | 3'UTR           | c.*3761G>A              |
| 830    | DGKG      | chr3       | ENSG00000058866 | Intron          | c.-248-40del            |
| 831    | DGKI      | chr7       | ENSG00000157680 | Intron          | c.876+32C>T             |
| 832    | DGKQ      | chr4       | ENSG00000145214 | Intron          | c.2728-59G>A            |
| 833    | DHDH      | chr19      | ENSG00000104808 | Frame shift Ins | c.790dup                |
| 834    | DHRS7     | chr14      | ENSG00000100612 | Missense        | c.982T>C                |
| 835    | DHX30     | chr3       | ENSG00000132153 | Frame shift del | c.3025del               |
| 836    | DHX30     | chr3       | ENSG00000132153 | Frame shift del | c.3025del               |
| 837    | DHX32     | chr10      | ENSG00000089876 | 5'UTR           | c.-339del               |
| 838    | DHX33     | chr17      | ENSG00000005100 | 3'UTR           | c.*3078del              |
| 839    | DIP2C     | chr10      | ENSG00000151240 | Intron          | c.2985+76 2985+78del    |
| 840    | DIPK1A    | chr1       | ENSG00000154511 | 3'UTR           | c.*72del                |
| 841    | DIPK1B    | chr9       | ENSG00000165716 | 5'UTR           | c.-189 -188del          |
| 842    | DIPK2A    | chr3       | ENSG00000181744 | 3'UTR           | c.*459T>C               |
| 843    | DISC1     | chr1       | ENSG00000162946 | 3'UTR           | c.*888T>C               |
| 844    | DISC1     | chr1       | ENSG00000162946 | 3'UTR           | c.*99G>A                |
| 845    | DLD       | chr7       | ENSG00000091140 | Missense        | c.109G>A                |
| 846    | DLEC1     | chr3       | ENSG00000008226 | Silent          | c.708T>C                |



| Number | Gene name | Chromosome | Gene_ID         | Mutation        | Nucleotide substitution  |
|--------|-----------|------------|-----------------|-----------------|--------------------------|
| 847    | DLG1      | chr3       | ENSG00000075711 | Intron          | c.2005-22del             |
| 848    | DLG2      | chr11      | ENSG00000150672 | Intron          | c.858+3317G>T            |
| 849    | DLG2      | chr11      | ENSG00000150672 | Intron          | c.322-22019 322-22016del |
| 850    | DLG2      | chr11      | ENSG00000150672 | 5'UTR           | c.-313T>C                |
| 851    | DLG4      | chr17      | ENSG00000132535 | 3'UTR           | c.*495del                |
| 852    | DLGAP5    | chr14      | ENSG00000126787 | Intron          | c.2064-19T>C             |
| 853    | DLX3      | chr17      | ENSG00000064195 | 3'UTR           | c.*1224del               |
| 854    | DMBT1     | chr10      | ENSG00000187908 | 3'UTR           | c.*249T>C                |
| 855    | DMRT1     | chr9       | ENSG00000137090 | 3'UTR           | c.*242del                |
| 856    | DMRT3     | chr9       | ENSG00000064218 | Missense        | c.5A>G                   |
| 857    | DMTN      | chr8       | ENSG00000158856 | 3'UTR           | c.*855del                |
| 858    | DNAAF3    | chr19      | ENSG00000167646 | Missense        | c.1264T>C                |
| 859    | DNAH1     | chr3       | ENSG00000114841 | Missense        | c.2407A>G                |
| 860    | DNAH10    | chr12      | ENSG00000197653 | Missense        | c.1361G>A                |
| 861    | DNAH11    | chr7       | ENSG00000105877 | Intron          | c.5482-1020del           |
| 862    | DNAH11    | chr7       | ENSG00000105877 | Missense        | c.5525A>G                |
| 863    | DNAH17    | chr17      | ENSG00000187775 | Frame shift Ins | c.12390dup               |
| 864    | DNAH5     | chr5       | ENSG00000039139 | Splice region   | c.6062-5C>T              |
| 865    | DNAI2     | chr17      | ENSG00000171595 | Silent          | c.1713G>A                |
| 866    | DNAJA1    | chr9       | ENSG00000086061 | Missense        | c.101A>G                 |
| 867    | DNAJA1    | chr9       | ENSG00000086061 | In_Frame_Del    | c.717 719del             |
| 868    | DNAJB14   | chr4       | ENSG00000164031 | 3'UTR           | c.*1225del               |
| 869    | DNAJB2    | chr2       | ENSG00000135924 | 3'UTR           | c.*1574G>T               |
| 870    | DNAJC18   | chr5       | ENSG00000170464 | 3'UTR           | c.*1860del               |
| 871    | DNAJC6    | chr1       | ENSG00000116675 | Intron          | c.334-68G>A              |
| 872    | DNAJC8    | chr1       | ENSG00000126698 | Intron          | c.400-11del              |
| 873    | DNASE1    | chr16      | ENSG00000213918 | Missense        | c.442A>G                 |
| 874    | DNASE1    | chr16      | ENSG00000213918 | 3'UTR           | c.*4844C>T               |
| 875    | DNLZ      | chr9       | ENSG00000213221 | 3'UTR           | c.*1953G>A               |
| 876    | DNM1      | chr9       | ENSG00000106976 | Missense        | c.1868C>T                |
| 877    | DNMT1     | chr19      | ENSG00000130816 | Splice site     | c.3346+2T>C              |
| 878    | DNMT3B    | chr20      | ENSG00000088305 | Missense        | c.479G>A                 |
| 879    | DOC2A     | chr16      | ENSG00000149927 | Missense        | c.133G>A                 |
| 880    | DOCK1     | chr10      | ENSG00000150760 | Missense        | c.2924T>C                |
| 881    | DOCK10    | chr2       | ENSG00000135905 | Splice region   | c.243+3A>T               |
| 882    | DOCK2     | chr5       | ENSG00000134516 | Missense        | c.170G>A                 |
| 883    | DOCK2     | chr5       | ENSG00000134516 | Missense        | c.4836G>T                |
| 884    | DOCK3     | chr3       | ENSG00000088538 | Intron          | c.465-25T>G              |
| 885    | DOCK5     | chr8       | ENSG00000147459 | Intron          | c.224+32del              |
| 886    | DOCK5     | chr8       | ENSG00000147459 | 3'UTR           | c.*3378C>T               |
| 887    | DOCK6     | chr19      | ENSG00000130158 | Intron          | c.378-64A>G              |
| 888    | DOCK7     | chr1       | ENSG00000116641 | Missense        | c.2525A>G                |
| 889    | DOCK7     | chr1       | ENSG00000116641 | 3'UTR           | c.*373del                |
| 890    | DOP1B     | chr21      | ENSG00000142197 | Splice region   | c.1370+7A>T              |
| 891    | DPF3      | chr14      | ENSG00000205683 | Intron          | c.526-37A>G              |
| 892    | DPH5      | chr1       | ENSG00000117543 | Missense        | c.791A>G                 |
| 893    | DPP4      | chr2       | ENSG00000197635 | Intron          | c.286-57C>T              |
| 894    | DPP6      | chr7       | ENSG00000130226 | 5'UTR           | c.-182T>C                |
| 895    | DPPA4     | chr3       | ENSG00000121570 | 3'UTR           | c.*1402del               |
| 896    | DPY19L2P2 | chr7       | ENSG00000170629 | RNA             | n.371T>C                 |
| 897    | DQX1      | chr2       | ENSG00000144045 | Intron          | c.1145-25 1145-23del     |
| 898    | DRAM2     | chr1       | ENSG00000156171 | 3'UTR           | c.*600del                |
| 899    | DRAXIN    | chr1       | ENSG00000162490 | Intron          | c.758-55T>G              |

| Number | Gene name | Chromosome | Gene_ID         | Mutation        | Nucleotide substitution |
|--------|-----------|------------|-----------------|-----------------|-------------------------|
| 900    | DSC1      | chr18      | ENSG00000134765 | Intron          | c.148+97G>A             |
| 901    | DSE       | chr6       | ENSG00000111817 | 3'UTR           | c.*91del                |
| 902    | DSG3      | chr18      | ENSG00000134757 | Missense        | c.659C>A                |
| 903    | DSP       | chr6       | ENSG00000096696 | Silent          | c.5494C>T               |
| 904    | DST       | chr6       | ENSG00000151914 | Frame shift Ins | c.3518dup               |
| 905    | DSTN      | chr20      | ENSG00000125868 | Frame shift del | c.213del                |
| 906    | DTX2      | chr7       | ENSG00000091073 | Intron          | c.269-35T>C             |
| 907    | DUSP10    | chr1       | ENSG00000143507 | Missense        | c.1088A>G               |
| 908    | DUSP11    | chr2       | ENSG00000144048 | Intron          | c.451-13T>C             |
| 909    | DUSP4     | chr8       | ENSG00000120875 | 3'UTR           | c.*301del               |
| 910    | DUSP4     | chr8       | ENSG00000120875 | Silent          | c.1041G>A               |
| 911    | DUSP7     | chr3       | ENSG00000164086 | Missense        | c.279G>T                |
| 912    | DUSP9     | chrX       | ENSG00000130829 | 3'UTR           | c.*564del               |
| 913    | DUT       | chr15      | ENSG00000128951 | 3'UTR           | c.*147del               |
| 914    | DUT       | chr15      | ENSG00000128951 | 3'UTR           | c.*326del               |
| 915    | DYNAP     | chr18      | ENSG00000178690 | 3'UTR           | c.*2T>G                 |
| 916    | DYNC1LI1  | chr3       | ENSG00000144635 | 3'UTR           | c.*813A>G               |
| 917    | DYNC2H1   | chr11      | ENSG00000187240 | Silent          | c.2739A>G               |
| 918    | DYNC2LI1  | chr2       | ENSG00000138036 | Silent          | c.327T>C                |
| 919    | DYNLL1    | chr12      | ENSG00000088986 | Missense        | c.76A>G                 |
| 920    | E2F3      | chr6       | ENSG00000112242 | Intron          | c.393+1345T>C           |
| 921    | EBF2      | chr8       | ENSG00000221818 | 5'UTR           | c.-418del               |
| 922    | EBF3      | chr10      | ENSG00000108001 | 3'UTR           | c.*2080del              |
| 923    | ECEL1     | chr2       | ENSG00000171551 | Missense        | c.133G>A                |
| 924    | ECHDC3    | chr10      | ENSG00000134463 | Missense        | c.457G>A                |
| 925    | ECPAS     | chr9       | ENSG00000136813 | Intron          | c.1383-60del            |
| 926    | ECRG4     | chr2       | ENSG00000119147 | 3'UTR           | c.*189T>C               |
| 927    | ECT2L     | chr6       | ENSG00000203734 | Missense        | c.1968G>C               |
| 928    | EDEM1     | chr3       | ENSG00000134109 | Intron          | c.1338+73del            |
| 929    | EDEM3     | chr1       | ENSG00000116406 | 3'UTR           | c.*1264 *1265del        |
| 930    | EDEM3     | chr1       | ENSG00000116406 | 3'UTR           | c.*420T>A               |
| 931    | EDNRA     | chr4       | ENSG00000151617 | 3'UTR           | c.*568del               |
| 932    | EEF1A1    | chr6       | ENSG00000156508 | 3'UTR           | c.*1991 *1992del        |
| 933    | EEF1A1    | chr6       | ENSG00000156508 | 3'UTR           | c.*1206T>C              |
| 934    | EEF1AKMT1 | chr13      | ENSG00000150456 | Missense        | c.170A>G                |
| 935    | EEF2KMT   | chr16      | ENSG00000118894 | Missense        | c.32T>A                 |
| 936    | EFCAB11   | chr14      | ENSG00000140025 | 3'UTR           | c.*945 *946del          |
| 937    | EFHB      | chr3       | ENSG00000163576 | In Frame Del    | c.2107 2109del          |
| 938    | EFHB      | chr3       | ENSG00000163576 | In Frame Del    | c.2107 2109del          |
| 939    | EFHC2     | chrX       | ENSG00000183690 | 3'UTR           | c.*753del               |
| 940    | EFNB2     | chr13      | ENSG00000125266 | Missense        | c.880A>G                |
| 941    | EFTUD2    | chr17      | ENSG00000108883 | Missense        | c.1039G>A               |
| 942    | EGFR      | chr7       | ENSG00000146648 | 3'UTR           | c.*132A>G               |
| 943    | EGLN1     | chr1       | ENSG00000135766 | Intron          | c.1217-24 1217-23del    |
| 944    | EGLN3     | chr14      | ENSG00000129521 | Missense        | c.98A>G                 |
| 945    | EHD2      | chr19      | ENSG00000024422 | Missense        | c.1535T>C               |
| 946    | EIF1      | chr17      | ENSG00000173812 | 3'Flank         |                         |
| 947    | EIF1AX    | chrX       | ENSG00000173674 | 3'UTR           | c.*374G>A               |
| 948    | EIF2A     | chr3       | ENSG00000144895 | Intron          | c.1612-19T>C            |
| 949    | EIF2AK2   | chr2       | ENSG00000055332 | Splice site     | c.687+2T>C              |
| 950    | EIF2AK3   | chr2       | ENSG00000172071 | Silent          | c.360T>A                |
| 951    | EIF2AK4   | chr15      | ENSG00000128829 | Missense        | c.3776A>G               |
| 952    | EIF3C     | chr16      | ENSG00000184110 | Intron          | c.-30-11345G>A          |

| Number | Gene name | Chromosome | Gene_ID         | Mutation        | Nucleotide substitution |
|--------|-----------|------------|-----------------|-----------------|-------------------------|
| 953    | EIF3F     | chr11      | ENSG00000175390 | 3'UTR           | c.*4197 *4198del        |
| 954    | EIF3F     | chr11      | ENSG00000175390 | 3'UTR           | c.*4799del              |
| 955    | EIF3L     | chr22      | ENSG00000100129 | Missense        | c.1258A>G               |
| 956    | EIF3L     | chr22      | ENSG00000100129 | 3'UTR           | c.*870A>C               |
| 957    | EIF4A2    | chr3       | ENSG00000156976 | Intron          | c.517+23T>C             |
| 958    | EIF4E     | chr4       | ENSG00000151247 | Intron          | c.281+56del             |
| 959    | EIF4E3    | chr3       | ENSG00000163412 | 3'UTR           | c.*1588T>C              |
| 960    | EIF4E3    | chr3       | ENSG00000163412 | 3'UTR           | c.*624del               |
| 961    | EIF4EBP2  | chr10      | ENSG00000148730 | 3'UTR           | c.*2871T>C              |
| 962    | EIF4EBP2  | chr10      | ENSG00000148730 | 3'UTR           | c.*6589C>A              |
| 963    | EIF4G3    | chr1       | ENSG00000075151 | Missense        | c.4420G>T               |
| 964    | EIF4G3    | chr1       | ENSG00000075151 | Intron          | c.2943+18 2943+19del    |
| 965    | EIF4G3    | chr1       | ENSG00000075151 | Intron          | c.31-25 31-23del        |
| 966    | EIF4H     | chr7       | ENSG00000106682 | 5'Flank         |                         |
| 967    | EIF5A     | chr17      | ENSG00000132507 | Missense        | c.374A>G                |
| 968    | EIF5B     | chr2       | ENSG00000158417 | Frame shift Ins | c.374dup                |
| 969    | ELK1      | chrX       | ENSG00000126767 | 3'UTR           | c.*744del               |
| 970    | ELMO2     | chr20      | ENSG00000062598 | Missense        | c.865C>T                |
| 971    | ELMSAN1   | chr14      | ENSG00000156030 | Silent          | c.3201T>C               |
| 972    | ELOA      | chr1       | ENSG00000011007 | 5'UTR           | c.-270T>G               |
| 973    | ELOVL2    | chr6       | ENSG00000197977 | 3'UTR           | c.*1488del              |
| 974    | ELP5      | chr17      | ENSG00000170291 | Missense        | c.427C>T                |
| 975    | EMC1      | chr1       | ENSG00000127463 | Missense        | c.1862C>A               |
| 976    | EMC3      | chr3       | ENSG00000125037 | 3'UTR           | c.*53G>A                |
| 977    | EML3      | chr11      | ENSG00000149499 | Intron          | c.2359+95T>C            |
| 978    | EMX2      | chr10      | ENSG00000170370 | 3'UTR           | c.*137del               |
| 979    | EN2       | chr7       | ENSG00000164778 | 3'UTR           | c.*199del               |
| 980    | EN2       | chr7       | ENSG00000164778 | 3'UTR           | c.*1969A>G              |
| 981    | ENDOU     | chr12      | ENSG00000111405 | Splice region   | c.628+6T>C              |
| 982    | ENGASE    | chr17      | ENSG00000167280 | Splice region   | c.442-6T>C              |
| 983    | ENO1      | chr1       | ENSG00000074800 | Intron          | c.445-31G>T             |
| 984    | ENPP1     | chr6       | ENSG00000197594 | 3'UTR           | c.*495del               |
| 985    | ENPP1     | chr6       | ENSG00000197594 | 3'UTR           | c.*3217del              |
| 986    | ENSA      | chr1       | ENSG00000143420 | 3'UTR           | c.*1109dup              |
| 987    | ENSA      | chr1       | ENSG00000143420 | 3'UTR           | c.*981G>T               |
| 988    | ENTPD6    | chr20      | ENSG00000197586 | Intron          | c.658+23 658+24del      |
| 989    | ENTPD6    | chr20      | ENSG00000197586 | Missense        | c.1198C>T               |
| 990    | ENTR1     | chr9       | ENSG00000165689 | Missense        | c.130A>G                |
| 991    | EOMES     | chr3       | ENSG00000163508 | Intron          | c.1380-96 1380-94del    |
| 992    | EOMES     | chr3       | ENSG00000163508 | Intron          | c.1380-96 1380-95del    |
| 993    | EP400     | chr12      | ENSG00000183495 | Silent          | c.2850C>T               |
| 994    | EPB41L2   | chr6       | ENSG00000079819 | Missense        | c.1756G>A               |
| 995    | EPB41L4B  | chr9       | ENSG00000095203 | 3'UTR           | c.*1509del              |
| 996    | EPC1      | chr10      | ENSG00000120616 | Missense        | c.222A>G                |
| 997    | EPG5      | chr18      | ENSG00000152223 | 3'UTR           | c.*4562A>G              |
| 998    | EPG5      | chr18      | ENSG00000152223 | Missense        | c.6286A>G               |
| 999    | EPHA10    | chr1       | ENSG00000183317 | 3'UTR           | c.*1514T>C              |
| 1000   | EPHA4     | chr2       | ENSG00000116106 | Missense        | c.2023G>A               |
| 1001   | EPHB2     | chr1       | ENSG00000133216 | Missense        | c.2249A>G               |
| 1002   | EPHX2     | chr8       | ENSG00000120915 | 5'UTR           | c.-148C>T               |
| 1003   | EPN2      | chr17      | ENSG00000072134 | 3'UTR           | c.*930del               |
| 1004   | EPPK1     | chr8       | ENSG00000261150 | Missense        | c.4886A>G               |
| 1005   | EPS8      | chr12      | ENSG00000151491 | Missense        | c.1192G>A               |

| Number | Gene name | Chromosome | Gene_ID         | Mutation      | Nucleotide substitution |
|--------|-----------|------------|-----------------|---------------|-------------------------|
| 1006   | EPS8L2    | chr11      | ENSG00000177106 | Silent        | c.711T>C                |
| 1007   | ERAP1     | chr5       | ENSG00000164307 | Intron        | c.2818+5749C>A          |
| 1008   | ERBB3     | chr12      | ENSG00000065361 | Splice site   | c.-104-2A>C             |
| 1009   | ERBB4     | chr2       | ENSG00000178568 | 3'UTR         | c.*4387del              |
| 1010   | ERBB4     | chr2       | ENSG00000178568 | 3'UTR         | c.*3252T>C              |
| 1011   | ERBIN     | chr5       | ENSG00000112851 | 3'UTR         | c.*3089del              |
| 1012   | ERC1      | chr12      | ENSG00000082805 | Intron        | c.*9-53T>C              |
| 1013   | ERCC1     | chr19      | ENSG00000012061 | Missense      | c.638A>G                |
| 1014   | ERCC2     | chr19      | ENSG00000104884 | Splice region | c.1833G>A               |
| 1015   | ERCC3     | chr2       | ENSG00000163161 | Missense      | c.1495A>G               |
| 1016   | ERCC6     | chr10      | ENSG00000225830 | Missense      | c.1339G>A               |
| 1017   | ERG       | chr21      | ENSG00000157554 | 3'UTR         | c.*3121A>G              |
| 1018   | ERG28     | chr14      | ENSG00000133935 | Missense      | c.67A>G                 |
| 1019   | ERGIC2    | chr12      | ENSG00000087502 | 3'UTR         | c.*366del               |
| 1020   | ERGIC3    | chr20      | ENSG00000125991 | 3'UTR         | c.*239dup               |
| 1021   | ERICH5    | chr8       | ENSG00000177459 | 3'UTR         | c.*144G>T               |
| 1022   | ERICH6    | chr3       | ENSG00000163645 | Intron        | c.404-645 404-644del    |
| 1023   | ERLIN1    | chr10      | ENSG00000107566 | Silent        | c.840G>A                |
| 1024   | ERMP1     | chr9       | ENSG00000099219 | Silent        | c.1080G>A               |
| 1025   | ERP27     | chr12      | ENSG00000139055 | Intron        | c.333+5717del           |
| 1026   | ESPL1     | chr12      | ENSG00000135476 | Silent        | c.1782G>A               |
| 1027   | ESPN      | chr1       | ENSG00000187017 | Silent        | c.1428A>G               |
| 1028   | ESR1      | chr6       | ENSG00000091831 | 3'UTR         | c.*2550del              |
| 1029   | ESRP1     | chr8       | ENSG00000104413 | 3'UTR         | c.*1386del              |
| 1030   | ESYT1     | chr12      | ENSG00000139641 | Intron        | c.1381-36G>A            |
| 1031   | ETHE1     | chr19      | ENSG00000105755 | Silent        | c.720T>C                |
| 1032   | ETS2      | chr21      | ENSG00000157557 | 3'UTR         | c.*1772T>C              |
| 1033   | ETV1      | chr7       | ENSG00000006468 | 3'UTR         | c.*136C>A               |
| 1034   | ETV1      | chr7       | ENSG00000006468 | Intron        | c.749-70A>G             |
| 1035   | ETV3      | chr1       | ENSG00000117036 | 3'UTR         | c.*304G>A               |
| 1036   | ETV3      | chr1       | ENSG00000117036 | Intron        | c.47-44A>G              |
| 1037   | ETV5      | chr3       | ENSG00000244405 | 3'UTR         | c.*1965 *1968del        |
| 1038   | EVC       | chr4       | ENSG00000072840 | 3'UTR         | c.*2167A>G              |
| 1039   | EVI5      | chr1       | ENSG00000067208 | 3'UTR         | c.*3166G>T              |
| 1040   | EVX2      | chr2       | ENSG00000174279 | 3'UTR         | c.*419del               |
| 1041   | EWSR1     | chr22      | ENSG00000182944 | Intron        | c.1180+54A>C            |
| 1042   | EXD3      | chr9       | ENSG00000187609 | Nonsense      | c.88C>T                 |
| 1043   | EXOC3     | chr5       | ENSG00000180104 | Missense      | c.1822C>T               |
| 1044   | EXOC5     | chr14      | ENSG00000070367 | 3'UTR         | c.*3729T>C              |
| 1045   | EXOC5     | chr14      | ENSG00000070367 | 3'UTR         | c.*2989del              |
| 1046   | EXOC5     | chr14      | ENSG00000070367 | 3'UTR         | c.*2226del              |
| 1047   | EXOC6     | chr10      | ENSG00000138190 | 3'UTR         | c.*1027del              |
| 1048   | EXOC8     | chr1       | ENSG00000116903 | Missense      | c.883G>A                |
| 1049   | EXT1      | chr8       | ENSG00000182197 | 3'UTR         | c.*4368T>C              |
| 1050   | EXTL1     | chr1       | ENSG00000158008 | 3'UTR         | c.*585C>T               |
| 1051   | EYA1      | chr8       | ENSG00000104313 | 3'UTR         | c.*736A>G               |
| 1052   | EYA1      | chr8       | ENSG00000104313 | Missense      | c.1214C>G               |
| 1053   | EYA4      | chr6       | ENSG00000112319 | Intron        | c.371-12del             |
| 1054   | EYA4      | chr6       | ENSG00000112319 | Missense      | c.875C>T                |
| 1055   | F11R      | chr1       | ENSG00000158769 | Missense      | c.31C>A                 |
| 1056   | FA2H      | chr16      | ENSG00000103089 | 3'UTR         | c.*876del               |
| 1057   | FABP5     | chr8       | ENSG00000164687 | Intron        | c.79+15C>A              |
| 1058   | FABP7     | chr6       | ENSG00000164434 | 3'UTR         | c.*1512del              |

| Number | Gene name | Chromosome | Gene_ID         | Mutation        | Nucleotide substitution |
|--------|-----------|------------|-----------------|-----------------|-------------------------|
| 1059   | FABP7     | chr6       | ENSG00000164434 | 3'UTR           | c.*225 *226del          |
| 1060   | FAF2      | chr5       | ENSG00000113194 | 3'UTR           | c.*1258del              |
| 1061   | FAH       | chr15      | ENSG00000103876 | Intron          | c.455+836G>A            |
| 1062   | FAHD2A    | chr2       | ENSG00000115042 | 3'UTR           | c.*1958dup              |
| 1063   | FAM107B   | chr10      | ENSG00000065809 | 3'UTR           | c.*2016A>G              |
| 1064   | FAM126B   | chr2       | ENSG00000155744 | Intron          | c.-129+7301del          |
| 1065   | FAM131A   | chr3       | ENSG00000175182 | Missense        | c.140T>C                |
| 1066   | FAM135B   | chr8       | ENSG00000147724 | 3'UTR           | c.*2056G>A              |
| 1067   | FAM13B    | chr5       | ENSG00000031003 | Missense        | c.1378G>A               |
| 1068   | FAM160A2  | chr11      | ENSG00000051009 | Missense        | c.2414C>A               |
| 1069   | FAM160B1  | chr10      | ENSG00000151553 | Missense        | c.890A>G                |
| 1070   | FAM161A   | chr2       | ENSG00000170264 | 3'UTR           | c.*828del               |
| 1071   | FAM161B   | chr14      | ENSG00000156050 | Missense        | c.484G>A                |
| 1072   | FAM169A   | chr5       | ENSG00000198780 | 3'UTR           | c.*3342del              |
| 1073   | FAM169B   | chr15      | ENSG00000283597 | 3'Flank         |                         |
| 1074   | FAM171A2  | chr17      | ENSG00000161682 | Intron          | c.778+20G>A             |
| 1075   | FAM171B   | chr2       | ENSG00000144369 | 5'Flank         |                         |
| 1076   | FAM177B   | chr1       | ENSG00000197520 | 3'UTR           | c.*411G>A               |
| 1077   | FAM178B   | chr2       | ENSG00000168754 | Intron          | c.74-5227G>C            |
| 1078   | FAM186A   | chr12      | ENSG00000185958 | Intron          | c.6848+60del            |
| 1079   | FAM192A   | chr16      | ENSG00000172775 | Intron          | c.547+38T>C             |
| 1080   | FAM193A   | chr4       | ENSG00000125386 | 3'UTR           | c.*323T>C               |
| 1081   | FAM193B   | chr5       | ENSG00000146067 | Intron          | c.-129-257A>G           |
| 1082   | FAM204A   | chr10      | ENSG00000165669 | 3'UTR           | c.*3297del              |
| 1083   | FAM205BP  | chr9       | ENSG00000257198 | RNA             | n.2762C>T               |
| 1084   | FAM214B   | chr9       | ENSG00000005238 | Frame shift Ins | c.124dup                |
| 1085   | FAM25G    | chr10      | ENSG00000189090 | Missense        | c.125C>T                |
| 1086   | FAM3A     | chrX       | ENSG00000071889 | Missense        | c.548T>C                |
| 1087   | FAM43B    | chr1       | ENSG00000183114 | 5'Flank         |                         |
| 1088   | FAM71A    | chr1       | ENSG00000162771 | Silent          | c.1155A>G               |
| 1089   | FAM71E2   | chr19      | ENSG00000180043 | Silent          | c.2070C>A               |
| 1090   | FAM76B    | chr11      | ENSG00000077458 | 3'UTR           | c.*731A>G               |
| 1091   | FAM91A1   | chr8       | ENSG00000176853 | 5'UTR           | c.-55A>G                |
| 1092   | FAM91A1   | chr8       | ENSG00000176853 | 3'UTR           | c.*2422del              |
| 1093   | FANCE     | chr6       | ENSG00000112039 | Missense        | c.716T>C                |
| 1094   | FANCF     | chr11      | ENSG00000183161 | 3'Flank         |                         |
| 1095   | FANCM     | chr14      | ENSG00000187790 | Intron          | c.2160+39del            |
| 1096   | FAR1      | chr11      | ENSG00000197601 | 5'UTR           | c.-1631A>G              |
| 1097   | FARP1     | chr13      | ENSG00000152767 | Missense        | c.28C>A                 |
| 1098   | FARSA     | chr19      | ENSG00000179115 | Silent          | c.909C>T                |
| 1099   | FARSA     | chr19      | ENSG00000179115 | Intron          | c.504-24T>C             |
| 1100   | FAS       | chr10      | ENSG00000026103 | Intron          | c.676+47T>C             |
| 1101   | FBN1      | chr15      | ENSG00000166147 | Missense        | c.8402A>G               |
| 1102   | FBN1      | chr15      | ENSG00000166147 | Missense        | c.3656A>G               |
| 1103   | FBN3      | chr19      | ENSG00000142449 | Frame shift Ins | c.2259dup               |
| 1104   | FBN3      | chr19      | ENSG00000142449 | Missense        | c.142C>T                |
| 1105   | FBRS      | chr16      | ENSG00000156860 | 5'UTR           | c.-208del               |
| 1106   | FBXO11    | chr2       | ENSG00000138081 | Missense        | c.167A>G                |
| 1107   | FBXO22    | chr15      | ENSG00000167196 | Intron          | c.279+72dup             |
| 1108   | FBXO28    | chr1       | ENSG00000143756 | 3'UTR           | c.*435del               |
| 1109   | FBXO32    | chr8       | ENSG00000156804 | 3'UTR           | c.*3720T>C              |
| 1110   | FBXO42    | chr1       | ENSG00000037637 | 3'UTR           | c.*1723A>G              |
| 1111   | FBXO9     | chr6       | ENSG00000112146 | 3'UTR           | c.*2359dup              |

| Number | Gene name | Chromosome | Gene_ID         | Mutation        | Nucleotide substitution |
|--------|-----------|------------|-----------------|-----------------|-------------------------|
| 1112   | FBXW12    | chr3       | ENSG00000164049 | Intron          | c.986-17G>A             |
| 1113   | FCER2     | chr19      | ENSG00000104921 | Missense        | c.566A>G                |
| 1114   | FCHO1     | chr19      | ENSG00000130475 | Missense        | c.1994G>A               |
| 1115   | FCHO2     | chr5       | ENSG00000157107 | 3'UTR           | c.*2130del              |
| 1116   | FCRL4     | chr1       | ENSG00000163518 | Missense        | c.539A>C                |
| 1117   | FCRL5     | chr1       | ENSG00000143297 | 3'UTR           | c.*2107T>A              |
| 1118   | FCRL5     | chr1       | ENSG00000143297 | 3'UTR           | c.*1731C>A              |
| 1119   | FER1L5    | chr2       | ENSG00000249715 | Silent          | c.45A>G                 |
| 1120   | FER1L6    | chr8       | ENSG00000214814 | Intron          | c.1701-68A>G            |
| 1121   | FES       | chr15      | ENSG00000182511 | Missense        | c.208A>G                |
| 1122   | FGD3      | chr9       | ENSG00000127084 | Missense        | c.1655G>T               |
| 1123   | FGD6      | chr12      | ENSG00000180263 | 3'UTR           | c.*4622del              |
| 1124   | FGF20     | chr8       | ENSG00000078579 | 5'UTR           | c.-28dup                |
| 1125   | FGF6      | chr12      | ENSG00000111241 | Missense        | c.314G>A                |
| 1126   | FGF6      | chr12      | ENSG00000111241 | Missense        | c.230G>A                |
| 1127   | FGF7      | chr15      | ENSG00000140285 | Missense        | c.536C>T                |
| 1128   | FGFR1OP2  | chr12      | ENSG00000111790 | 3'UTR           | c.*938 *939del          |
| 1129   | FGFR1OP2  | chr12      | ENSG00000111790 | 3'UTR           | c.*1022A>G              |
| 1130   | FGFR4     | chr5       | ENSG00000160867 | Missense        | c.1151C>T               |
| 1131   | FHDC1     | chr4       | ENSG00000137460 | 3'UTR           | c.*1917del              |
| 1132   | FHL2      | chr2       | ENSG00000115641 | 3'UTR           | c.*382A>G               |
| 1133   | FIGLA     | chr2       | ENSG00000183733 | 5'Flank         |                         |
| 1134   | FIP1L1    | chr4       | ENSG00000145216 | Splice site     | c.85+2T>C               |
| 1135   | FKBP14    | chr7       | ENSG00000106080 | 3'UTR           | c.*3207G>A              |
| 1136   | FKBP14    | chr7       | ENSG00000106080 | Intron          | c.350-1172A>G           |
| 1137   | FKTN      | chr9       | ENSG00000106692 | 3'UTR           | c.*3614G>T              |
| 1138   | FKTN      | chr9       | ENSG00000106692 | 3'UTR           | c.*4388del              |
| 1139   | FLG       | chr1       | ENSG00000143631 | Silent          | c.6261A>G               |
| 1140   | FLI1      | chr11      | ENSG00000151702 | Silent          | c.588G>A                |
| 1141   | FLII      | chr17      | ENSG00000177731 | Missense        | c.3578A>G               |
| 1142   | FLNB      | chr3       | ENSG00000136068 | Missense        | c.6887A>G               |
| 1143   | FLNC      | chr7       | ENSG00000128591 | Frame shift del | c.4275del               |
| 1144   | FLNC      | chr7       | ENSG00000128591 | Frame shift del | c.4275del               |
| 1145   | FLRT2     | chr14      | ENSG00000185070 | 3'UTR           | c.*2675C>T              |
| 1146   | FLRT3     | chr20      | ENSG00000125848 | 3'UTR           | c.*442del               |
| 1147   | FLT4      | chr5       | ENSG00000037280 | 3'UTR           | c.*712T>C               |
| 1148   | FMNL1     | chr17      | ENSG00000184922 | Intron          | c.64-6067del            |
| 1149   | FMNL1     | chr17      | ENSG00000184922 | Frame shift del | c.1760del               |
| 1150   | FMNL3     | chr12      | ENSG00000161791 | 3'UTR           | c.*6197A>C              |
| 1151   | FMNL3     | chr12      | ENSG00000161791 | Missense        | c.3008A>G               |
| 1152   | FMO5      | chr1       | ENSG00000131781 | Intron          | c.1257-24T>C            |
| 1153   | FMOD      | chr1       | ENSG00000122176 | Missense        | c.800C>T                |
| 1154   | FNBP1     | chr9       | ENSG00000187239 | Intron          | c.408+50 408+51delinsTC |
| 1155   | FNDC3B    | chr3       | ENSG00000075420 | 3'UTR           | c.*1849T>C              |
| 1156   | FNDC5     | chr1       | ENSG00000160097 | 3'UTR           | c.*442 *444del          |
| 1157   | FNIP1     | chr5       | ENSG00000217128 | 3'UTR           | c.*739del               |
| 1158   | FOXA1     | chr14      | ENSG00000129514 | Missense        | c.1145A>C               |
| 1159   | FOXA2     | chr20      | ENSG00000125798 | 3'UTR           | c.*389del               |
| 1160   | FOXA2     | chr20      | ENSG00000125798 | 3'UTR           | c.*388A>T               |
| 1161   | FOXD2     | chr1       | ENSG00000186564 | 5'UTR           | c.-1557C>T              |
| 1162   | FOXD2     | chr1       | ENSG00000186564 | Missense        | c.416C>A                |
| 1163   | FOXJ2     | chr12      | ENSG00000065970 | 3'UTR           | c.*2650del              |
| 1164   | FOXL2NB   | chr3       | ENSG00000206262 | 3'UTR           | c.*2421del              |

| Number | Gene name | Chromosome | Gene_ID         | Mutation        | Nucleotide substitution |
|--------|-----------|------------|-----------------|-----------------|-------------------------|
| 1165   | FOXN2     | chr2       | ENSG00000170802 | 3'UTR           | c.*1786del              |
| 1166   | FOXP4     | chr6       | ENSG00000137166 | Missense        | c.1925C>T               |
| 1167   | FOXRED2   | chr22      | ENSG00000100350 | Missense        | c.1172A>G               |
| 1168   | FPGT      | chr1       | ENSG00000254685 | 3'UTR           | c.*565G>A               |
| 1169   | FRAT2     | chr10      | ENSG00000181274 | 3'UTR           | c.*304T>G               |
| 1170   | FRMD1     | chr6       | ENSG00000153303 | Missense        | c.578A>G                |
| 1171   | FRMPD1    | chr9       | ENSG00000070601 | Missense        | c.3851G>A               |
| 1172   | FRMPD3    | chrX       | ENSG00000147234 | Missense        | c.3454G>A               |
| 1173   | FRYL      | chr4       | ENSG00000075539 | Intron          | c.121-17_121-16del      |
| 1174   | FSD1      | chr19      | ENSG00000105255 | Intron          | c.490+18T>C             |
| 1175   | FSD1L     | chr9       | ENSG00000106701 | Intron          | c.369-7981G>A           |
| 1176   | FSD2      | chr15      | ENSG00000186628 | Missense        | c.1822T>C               |
| 1177   | FSIP2     | chr2       | ENSG00000188738 | Frame shift del | c.8038del               |
| 1178   | FTCDNL1   | chr2       | ENSG00000226124 | Frame shift del | c.441_442del            |
| 1179   | FUS       | chr16      | ENSG00000089280 | 5'UTR           | c.-43T>C                |
| 1180   | FUT2      | chr19      | ENSG00000176920 | 3'UTR           | c.*169C>T               |
| 1181   | FXR1      | chr3       | ENSG00000114416 | Intron          | c.258+29T>G             |
| 1182   | FZD2      | chr17      | ENSG00000180340 | Missense        | c.265C>T                |
| 1183   | FZD3      | chr8       | ENSG00000104290 | Silent          | c.396T>C                |
| 1184   | FZD3      | chr8       | ENSG00000104290 | 3'UTR           | c.*8310T>C              |
| 1185   | FZD4      | chr11      | ENSG00000174804 | 3'UTR           | c.*3904dup              |
| 1186   | FZD6      | chr8       | ENSG00000164930 | Frame shift del | c.125del                |
| 1187   | FZD6      | chr8       | ENSG00000164930 | Frame shift del | c.125del                |
| 1188   | G6PC      | chr17      | ENSG00000131482 | Intron          | c.447-94T>C             |
| 1189   | GAA       | chr17      | ENSG00000171298 | Missense        | c.2468T>C               |
| 1190   | GAB1      | chr4       | ENSG00000109458 | Missense        | c.1929A>T               |
| 1191   | GABARAP   | chr17      | ENSG00000170296 | In Frame Del    | c.21_23del              |
| 1192   | GABARAP   | chr17      | ENSG00000170296 | In Frame Del    | c.21_23del              |
| 1193   | GABBR2    | chr9       | ENSG00000136928 | 3'UTR           | c.*2046del              |
| 1194   | GABBR2    | chr9       | ENSG00000136928 | 3'UTR           | c.*1845del              |
| 1195   | GABPA     | chr21      | ENSG00000154727 | Missense        | c.628A>G                |
| 1196   | GABPB2    | chr1       | ENSG00000143458 | Splice site     | c.623-2A>G              |
| 1197   | GABPB2    | chr1       | ENSG00000143458 | Intron          | c.808+3978T>C           |
| 1198   | GABPB2    | chr1       | ENSG00000143458 | 3'UTR           | c.*3701T>C              |
| 1199   | GABPB2    | chr1       | ENSG00000143458 | 3'UTR           | c.*7077A>G              |
| 1200   | GABRA4    | chr4       | ENSG00000109158 | 3'UTR           | c.*7984A>G              |
| 1201   | GABRA4    | chr4       | ENSG00000109158 | 3'UTR           | c.*2916A>G              |
| 1202   | GABRB2    | chr5       | ENSG00000145864 | 3'UTR           | c.*5310del              |
| 1203   | GAK       | chr4       | ENSG00000178950 | Intron          | c.1205+36A>G            |
| 1204   | GAL3ST3   | chr11      | ENSG00000175229 | 3'UTR           | c.*134A>G               |
| 1205   | GAL3ST4   | chr7       | ENSG00000197093 | Missense        | c.874G>T                |
| 1206   | GALC      | chr14      | ENSG00000054983 | Intron          | c.329-477del            |
| 1207   | GALNT10   | chr5       | ENSG00000164574 | 3'UTR           | c.*1347_1348del         |
| 1208   | GALNT11   | chr7       | ENSG00000178234 | 3'UTR           | c.*497del               |
| 1209   | GALNT14   | chr2       | ENSG00000158089 | Intron          | c.946+10T>C             |
| 1210   | GALNT7    | chr4       | ENSG00000109586 | 3'UTR           | c.*1021A>G              |
| 1211   | GALNTL6   | chr4       | ENSG00000174473 | 3'UTR           | c.*651del               |
| 1212   | GAN       | chr16      | ENSG00000261609 | 3'UTR           | c.*1443del              |
| 1213   | GAPT      | chr5       | ENSG00000175857 | 3'UTR           | c.*21del                |
| 1214   | GAREM1    | chr18      | ENSG00000141441 | 3'UTR           | c.*1743del              |
| 1215   | GAREM1    | chr18      | ENSG00000141441 | Missense        | c.2273G>T               |
| 1216   | GAS7      | chr17      | ENSG00000007237 | Intron          | c.552-19G>T             |
| 1217   | GASK1B    | chr4       | ENSG00000164125 | 3'UTR           | c.*1996_1998del         |

| Number | Gene name | Chromosome | Gene_ID         | Mutation        | Nucleotide substitution |
|--------|-----------|------------|-----------------|-----------------|-------------------------|
| 1218   | GATA1     | chrX       | ENSG00000102145 | Intron          | c.-19-40del             |
| 1219   | GATA3     | chr10      | ENSG00000107485 | Silent          | c.276A>T                |
| 1220   | GATA4     | chr8       | ENSG00000136574 | Intron          | c.997+30G>T             |
| 1221   | GATA5     | chr20      | ENSG00000130700 | Missense        | c.916T>C                |
| 1222   | GCM1      | chr6       | ENSG00000137270 | Frame shift del | c.88del                 |
| 1223   | GCM1      | chr6       | ENSG00000137270 | Frame shift del | c.88del                 |
| 1224   | GCNA      | chrX       | ENSG00000147174 | Intron          | c.140+42 140+43del      |
| 1225   | GCNA      | chrX       | ENSG00000147174 | Intron          | c.221+43 221+44del      |
| 1226   | GCNT1     | chr9       | ENSG00000187210 | Missense        | c.508G>A                |
| 1227   | GCNT2     | chr6       | ENSG00000111846 | 3'UTR           | c.*2057A>G              |
| 1228   | GCSAM     | chr3       | ENSG00000174500 | 3'UTR           | c.*2555A>G              |
| 1229   | GCSAM     | chr3       | ENSG00000174500 | 3'UTR           | c.*1229dup              |
| 1230   | GCSAML    | chr1       | ENSG00000169224 | 3'UTR           | c.*264del               |
| 1231   | GDE1      | chr16      | ENSG00000006007 | 3'UTR           | c.*666del               |
| 1232   | GDNF      | chr5       | ENSG00000168621 | 3'UTR           | c.*540del               |
| 1233   | GDPD2     | chrX       | ENSG00000130055 | Intron          | c.105+52T>G             |
| 1234   | GDPD3     | chr16      | ENSG00000102886 | Intron          | c.820-39A>G             |
| 1235   | GDPD4     | chr11      | ENSG00000178795 | Splice region   | c.54-4del               |
| 1236   | GET4      | chr7       | ENSG00000239857 | Missense        | c.400A>G                |
| 1237   | GFM1      | chr3       | ENSG00000168827 | Silent          | c.2073T>C               |
| 1238   | GFPT2     | chr5       | ENSG00000131459 | 3'UTR           | c.*593C>A               |
| 1239   | GGA2      | chr16      | ENSG00000103365 | Intron          | c.1731+56A>G            |
| 1240   | GIGYF1    | chr7       | ENSG00000146830 | Frame shift del | c.2440del               |
| 1241   | GIMAP1    | chr7       | ENSG00000213203 | 3'UTR           | c.*101A>G               |
| 1242   | GIMAP5    | chr7       | ENSG00000196329 | 3'UTR           | c.*782G>T               |
| 1243   | GINS1     | chr20      | ENSG00000101003 | 3'UTR           | c.*1031del              |
| 1244   | GINS4     | chr8       | ENSG00000147536 | 3'UTR           |                         |
| 1245   | GIPC2     | chr1       | ENSG00000137960 | 3'UTR           | c.*502del               |
| 1246   | GIT2      | chr12      | ENSG00000139436 | Intron          | c.405+53T>C             |
| 1247   | GJA4      | chr1       | ENSG00000187513 | Missense        | c.175C>T                |
| 1248   | GJA5      | chr1       | ENSG00000265107 | 3'UTR           | c.*1751A>G              |
| 1249   | GJB5      | chr1       | ENSG00000189280 | 3'Flank         |                         |
| 1250   | GK5       | chr3       | ENSG00000175066 | Intron          | c.816+126del            |
| 1251   | GLDN      | chr15      | ENSG00000186417 | Missense        | c.223G>A                |
| 1252   | GLI2      | chr2       | ENSG00000074047 | Missense        | c.2740C>T               |
| 1253   | GLIPR2    | chr9       | ENSG00000122694 | 3'UTR           | c.*306T>G               |
| 1254   | GLMP      | chr1       | ENSG00000198715 | Missense        | c.724G>A                |
| 1255   | GLS       | chr2       | ENSG00000115419 | 3'UTR           | c.*437T>C               |
| 1256   | GLS       | chr2       | ENSG00000115419 | 3'UTR           | c.*1930T>C              |
| 1257   | GLT1D1    | chr12      | ENSG00000151948 | Intron          | c.375+47G>A             |
| 1258   | GLT8D2    | chr12      | ENSG00000120820 | Intron          | c.-163-10600A>G         |
| 1259   | GNAI2     | chr3       | ENSG00000114353 | Missense        | c.710C>A                |
| 1260   | GNAL      | chr18      | ENSG00000141404 | Silent          | c.273G>A                |
| 1261   | GNAQ      | chr9       | ENSG00000156052 | 5'UTR           | c.-7T>C                 |
| 1262   | GNAS      | chr20      | ENSG00000087460 | 3'UTR           | c.*38G>A                |
| 1263   | GOLPH3    | chr5       | ENSG00000113384 | 3'UTR           | c.*1362del              |
| 1264   | GOSR1     | chr17      | ENSG00000108587 | Intron          | c.546-11del             |
| 1265   | GP2       | chr16      | ENSG00000169347 | 3'UTR           | c.*783G>A               |
| 1266   | GPAT2     | chr2       | ENSG00000186281 | Intron          | c.1819-31C>A            |
| 1267   | GPATCH2   | chr1       | ENSG00000092978 | 3'UTR           | c.*3785del              |
| 1268   | GPC4      | chrX       | ENSG00000076716 | 3'UTR           | c.*879del               |
| 1269   | GPC6      | chr13      | ENSG00000183098 | Missense        | c.913C>T                |
| 1270   | GPER1     | chr7       | ENSG00000164850 | Missense        | c.1112C>A               |



| Number | Gene name | Chromosome | Gene_ID         | Mutation        | Nucleotide substitution |
|--------|-----------|------------|-----------------|-----------------|-------------------------|
| 1271   | GPM6A     | chr4       | ENSG00000150625 | 3'UTR           | c.*604del               |
| 1272   | GPNMB     | chr7       | ENSG00000136235 | 5'Flank         |                         |
| 1273   | GPNMB     | chr7       | ENSG00000136235 | Intron          | c.1523+18A>G            |
| 1274   | GPNMB     | chr7       | ENSG00000136235 | 3'UTR           | c.*154A>G               |
| 1275   | GPR137C   | chr14      | ENSG00000180998 | Intron          | c.1113-8del             |
| 1276   | GPR171    | chr3       | ENSG00000174946 | 3'UTR           | c.*85 *88del            |
| 1277   | GPR25     | chr1       | ENSG00000170128 | Silent          | c.477G>A                |
| 1278   | GPR25     | chr1       | ENSG00000170128 | 3'UTR           | c.*13G>C                |
| 1279   | GPR34     | chrX       | ENSG00000171659 | Missense        | c.797G>A                |
| 1280   | GPRC5B    | chr16      | ENSG00000167191 | 3'UTR           | c.*2296G>T              |
| 1281   | GPS1      | chr17      | ENSG00000169727 | Intron          | c.622-6del              |
| 1282   | GPSM1     | chr9       | ENSG00000160360 | Silent          | c.1416G>T               |
| 1283   | GPSM2     | chr1       | ENSG00000121957 | 3'UTR           | c.*476del               |
| 1284   | GPT2      | chr16      | ENSG00000166123 | Silent          | c.975C>T                |
| 1285   | GRAMD1B   | chr11      | ENSG00000023171 | Missense        | c.1493T>C               |
| 1286   | GRAMD2B   | chr5       | ENSG00000155324 | 3'UTR           | c.*530del               |
| 1287   | GREM2     | chr1       | ENSG00000180875 | Missense        | c.268C>T                |
| 1288   | GRHPR     | chr9       | ENSG00000137106 | Intron          | c.866-18T>C             |
| 1289   | GRIA2     | chr4       | ENSG00000120251 | Intron          | c.2292-304del           |
| 1290   | GRIN2A    | chr16      | ENSG00000183454 | 3'UTR           | c.*3637A>G              |
| 1291   | GRIN2A    | chr16      | ENSG00000183454 | 3'UTR           | c.*1432del              |
| 1292   | GRIPAP1   | chrX       | ENSG00000068400 | Intron          | c.2061+599del           |
| 1293   | GRM5      | chr11      | ENSG00000168959 | Missense        | c.3359C>T               |
| 1294   | GRTP1     | chr13      | ENSG00000139835 | Missense        | c.422T>C                |
| 1295   | GSAP      | chr7       | ENSG00000186088 | 3'UTR           | c.*432del               |
| 1296   | GSDME     | chr7       | ENSG00000105928 | Intron          | c.990+854del            |
| 1297   | GSE1      | chr16      | ENSG00000131149 | 3'UTR           | c.*2895A>G              |
| 1298   | GSTK1     | chr7       | ENSG00000197448 | Missense        | c.127C>A                |
| 1299   | GTF2E1    | chr3       | ENSG00000153767 | 3'UTR           | c.*191T>G               |
| 1300   | GTF3C1    | chr16      | ENSG00000077235 | Missense        | c.598A>G                |
| 1301   | GTF3C6    | chr6       | ENSG00000155115 | Missense        | c.314T>C                |
| 1302   | GTPBP1    | chr22      | ENSG00000100226 | Intron          | c.1918-30T>C            |
| 1303   | GTPBP10   | chr7       | ENSG00000105793 | 3'UTR           | c.*1336A>G              |
| 1304   | GTPBP10   | chr7       | ENSG00000105793 | 3'UTR           | c.*4072 *4074del        |
| 1305   | GTPBP2    | chr6       | ENSG00000172432 | Missense        | c.713T>C                |
| 1306   | GUCY1A2   | chr11      | ENSG00000152402 | 3'UTR           | c.*2392G>T              |
| 1307   | GUCY2D    | chr17      | ENSG00000132518 | Frame shift Ins | c.571dup                |
| 1308   | GULP1     | chr2       | ENSG00000144366 | 3'UTR           | c.*697 *698del          |
| 1309   | GVINP1    | chr11      | ENSG00000254838 | RNA             | n.2723A>T               |
| 1310   | GXYLT1    | chr12      | ENSG00000151233 | 3'UTR           | c.*3807del              |
| 1311   | H1FNT     | chr12      | ENSG00000187166 | Missense        | c.527C>T                |
| 1312   | H2AFJ     | chr12      | ENSG00000246705 | 3'Flank         |                         |
| 1313   | HAAO      | chr2       | ENSG00000162882 | Intron          | c.484+106G>A            |
| 1314   | HAPLN1    | chr5       | ENSG00000145681 | 3'UTR           | c.*2702A>G              |
| 1315   | HARS2     | chr5       | ENSG00000112855 | Silent          | c.1221T>C               |
| 1316   | HAUS6     | chr9       | ENSG00000147874 | 3'UTR           | c.*832del               |
| 1317   | HAUS7     | chrX       | ENSG00000213397 | 5'UTR           | c.-167del               |
| 1318   | HAVCR2    | chr5       | ENSG00000135077 | 3'UTR           | c.*1255del              |
| 1319   | HBS1L     | chr6       | ENSG00000112339 | 3'UTR           | c.*1091del              |
| 1320   | HCFC1     | chrX       | ENSG00000172534 | Missense        | c.2435C>T               |
| 1321   | HCFC1     | chrX       | ENSG00000172534 | 5'UTR           | c.-461T>C               |
| 1322   | HCN1      | chr5       | ENSG00000164588 | 3'UTR           | c.*1064A>G              |
| 1323   | HCN2      | chr19      | ENSG00000099822 | Missense        | c.965C>T                |

| Number | Gene name | Chromosome | Gene_ID         | Mutation        | Nucleotide substitution    |
|--------|-----------|------------|-----------------|-----------------|----------------------------|
| 1324   | HDAC9     | chr7       | ENSG00000048052 | Missense        | c.2536T>C                  |
| 1325   | HDGF      | chr1       | ENSG00000143321 | 3'UTR           | c.*885del                  |
| 1326   | HDLBP     | chr2       | ENSG00000115677 | Splice region   | c.1731+8T>C                |
| 1327   | HDLBP     | chr2       | ENSG00000115677 | Frame shift Ins | c.1456dup                  |
| 1328   | HEATR1    | chr1       | ENSG00000119285 | Intron          | c.3583+48C>T               |
| 1329   | HECA      | chr6       | ENSG00000112406 | Silent          | c.1620C>T                  |
| 1330   | HECTD2    | chr10      | ENSG00000165338 | Missense        | c.2164G>A                  |
| 1331   | HECTD3    | chr1       | ENSG00000126107 | Silent          | c.1188C>T                  |
| 1332   | HECTD4    | chr12      | ENSG00000173064 | Intron          | c.13114+249A>G             |
| 1333   | HEG1      | chr3       | ENSG00000173706 | 3'UTR           | c.*2434A>G                 |
| 1334   | HELZ2     | chr20      | ENSG00000130589 | Missense        | c.1654T>C                  |
| 1335   | HERC1     | chr15      | ENSG00000103657 | Missense        | c.512C>T                   |
| 1336   | HERC4     | chr10      | ENSG00000148634 | 5'UTR           | c.-378C>T                  |
| 1337   | HES3      | chr1       | ENSG00000173673 | Silent          | c.30T>C                    |
| 1338   | HEXA      | chr15      | ENSG00000213614 | 3'UTR           | c.*220del                  |
| 1339   | HEY2      | chr6       | ENSG00000135547 | 3'UTR           | c.*1403T>G                 |
| 1340   | HGS       | chr17      | ENSG00000185359 | Intron          | c.1566+25C>T               |
| 1341   | HIC2      | chr22      | ENSG00000169635 | 3'UTR           | c.*4346del                 |
| 1342   | HID1      | chr17      | ENSG00000167861 | 3'UTR           | c.*96T>C                   |
| 1343   | HIF1A     | chr14      | ENSG00000100644 | 5'UTR           | c.-9del                    |
| 1344   | HIF1A     | chr14      | ENSG00000100644 | Intron          | c.2094-41del               |
| 1345   | HINFP     | chr11      | ENSG00000172273 | 5'UTR           | c.-100T>C                  |
| 1346   | HINT2     | chr9       | ENSG00000137133 | Intron          | c.327+44A>T                |
| 1347   | HIP1R     | chr12      | ENSG00000130787 | Missense        | c.2998C>T                  |
| 1348   | HIPK2     | chr7       | ENSG00000064393 | 3'UTR           | c.*10083A>G                |
| 1349   | HIPK2     | chr7       | ENSG00000064393 | Silent          | c.3348C>T                  |
| 1350   | HIVEP2    | chr6       | ENSG00000010818 | Missense        | c.7019C>T                  |
| 1351   | HJURP     | chr2       | ENSG00000123485 | Intron          | c.185-92del                |
| 1352   | HLX       | chr1       | ENSG00000136630 | 5'Flank         |                            |
| 1353   | HMCN1     | chr1       | ENSG00000143341 | Silent          | c.4752C>T                  |
| 1354   | HMCN1     | chr1       | ENSG00000143341 | 3'UTR           | c.*464del                  |
| 1355   | HMGA2     | chr12      | ENSG00000149948 | Intron          | c.112-14T>C                |
| 1356   | HMGA2     | chr12      | ENSG00000149948 | 3'UTR           | c.*6059del                 |
| 1357   | HMGB1     | chr13      | ENSG00000189403 | 3'UTR           | c.*2004del                 |
| 1358   | HMGCLL1   | chr6       | ENSG00000146151 | 3'UTR           | c.*1843del                 |
| 1359   | HMGCR     | chr5       | ENSG00000113161 | 3'UTR           | c.*984del                  |
| 1360   | HMHB1     | chr5       | ENSG00000158497 | Missense        | c.56A>C                    |
| 1361   | HNRNPA1L2 | chr13      | ENSG00000139675 | 3'UTR           |                            |
| 1362   | HNRNPA2B1 | chr7       | ENSG00000122566 | Frame shift del | c.986del                   |
| 1363   | HNRNPA2B1 | chr7       | ENSG00000122566 | Frame shift del | c.986del                   |
| 1364   | HNRNPK    | chr9       | ENSG00000165119 | 3'UTR           | c.*464del                  |
| 1365   | HOXA1     | chr7       | ENSG00000105991 | Missense        | c.368A>G                   |
| 1366   | HOXA1     | chr7       | ENSG00000105991 | Silent          | c.234T>C                   |
| 1367   | HOXA4     | chr7       | ENSG00000197576 | Silent          | c.519C>T                   |
| 1368   | HOXA9     | chr7       | ENSG00000078399 | Missense        | c.32A>G                    |
| 1369   | HOXB13    | chr17      | ENSG00000159184 | 3'UTR           | c.*1520G>C                 |
| 1370   | HOXB3     | chr17      | ENSG00000120093 | Missense        | c.146G>A                   |
| 1371   | HOXB4     | chr17      | ENSG00000182742 | Silent          | c.384C>T                   |
| 1372   | HOXC4     | chr12      | ENSG00000198353 | Intron          | c.-124+15392 -124+15394del |
| 1373   | HPS1      | chr10      | ENSG00000107521 | Silent          | c.1701G>A                  |
| 1374   | HPSE2     | chr10      | ENSG00000172987 | 3'UTR           | c.*293A>G                  |
| 1375   | HRCT1     | chr9       | ENSG00000196196 | Missense        | c.266A>T                   |
| 1376   | HRH3      | chr20      | ENSG00000101180 | Missense        | c.224A>G                   |

| Number | Gene name | Chromosome | Gene_ID         | Mutation        | Nucleotide substitution |
|--------|-----------|------------|-----------------|-----------------|-------------------------|
| 1377   | HSD17B4   | chr5       | ENSG00000133835 | Intron          | c.1842+14T>C            |
| 1378   | HSF2      | chr6       | ENSG00000025156 | Intron          | c.1071-16del            |
| 1379   | HSPA12B   | chr20      | ENSG00000132622 | Intron          | c.1302-15T>C            |
| 1380   | HSPA8     | chr11      | ENSG00000109971 | 5'UTR           | c.-286A>G               |
| 1381   | HSPG2     | chr1       | ENSG00000142798 | Missense        | c.7036G>A               |
| 1382   | HSPH1     | chr13      | ENSG00000120694 | Intron          | c.307-14del             |
| 1383   | HTATSF1   | chrX       | ENSG00000102241 | Intron          | c.925-18del             |
| 1384   | HTR1F     | chr3       | ENSG00000179097 | Frame shift del | c.930del                |
| 1385   | HTR1F     | chr3       | ENSG00000179097 | Frame shift del | c.930del                |
| 1386   | HTRA3     | chr4       | ENSG00000170801 | 3'UTR           | c.*350T>C               |
| 1387   | HTT       | chr4       | ENSG00000197386 | Intron          | c.8786-29A>T            |
| 1388   | HUWE1     | chrX       | ENSG00000086758 | 3'UTR           | c.*559del               |
| 1389   | HUWE1     | chrX       | ENSG00000086758 | Missense        | c.12191A>G              |
| 1390   | IAH1      | chr2       | ENSG00000134330 | 5'UTR           | c.-238G>C               |
| 1391   | ICA1L     | chr2       | ENSG00000163596 | Intron          | c.685-49del             |
| 1392   | ICE1      | chr5       | ENSG00000164151 | 3'UTR           | c.*291del               |
| 1393   | ICE2      | chr15      | ENSG00000128915 | Intron          | c.409-10T>A             |
| 1394   | ICK       | chr6       | ENSG00000112144 | 3'UTR           | c.*168del               |
| 1395   | ICMT      | chr1       | ENSG00000116237 | 3'UTR           | c.*3034A>G              |
| 1396   | IDH2      | chr15      | ENSG00000182054 | Missense        | c.625G>A                |
| 1397   | IFFO2     | chr1       | ENSG00000169991 | 3'UTR           | c.*3799del              |
| 1398   | IFNA2     | chr9       | ENSG00000188379 | 3'UTR           | c.*494A>G               |
| 1399   | IFNB1     | chr9       | ENSG00000171855 | 3'UTR           | c.*91A>G                |
| 1400   | IFRD2     | chr3       | ENSG00000214706 | Missense        | c.535C>T                |
| 1401   | IFT140    | chr16      | ENSG00000187535 | Missense        | c.191A>G                |
| 1402   | IGF1      | chr12      | ENSG00000017427 | 3'UTR           | c.*5718del              |
| 1403   | IGF2      | chr11      | ENSG00000167244 | 3'UTR           | c.*2409del              |
| 1404   | IGF2BP1   | chr17      | ENSG00000159217 | 3'UTR           | c.*3063A>G              |
| 1405   | IGF2R     | chr6       | ENSG00000197081 | Splice site     | c.646+2T>C              |
| 1406   | IGFBP5    | chr2       | ENSG00000115461 | 3'UTR           | c.*1727dup              |
| 1407   | IGFBP5    | chr2       | ENSG00000115461 | 5'UTR           | c.-697del               |
| 1408   | IGHMBP2   | chr11      | ENSG00000132740 | Frame shift del | c.1165del               |
| 1409   | IGHMBP2   | chr11      | ENSG00000132740 | Frame shift del | c.1165del               |
| 1410   | IGKV1-27  | chr2       | ENSG00000244575 | Frame shift Ins | c.335dup                |
| 1411   | IGLL5     | chr22      | ENSG00000254709 | 3'Flank         |                         |
| 1412   | IGSF11    | chr3       | ENSG00000144847 | Missense        | c.619C>A                |
| 1413   | IK        | chr5       | ENSG00000113141 | Frame shift del | c.981del                |
| 1414   | IK        | chr5       | ENSG00000113141 | Frame shift del | c.981del                |
| 1415   | IKZF1     | chr7       | ENSG00000185811 | Missense        | c.542C>T                |
| 1416   | IKZF2     | chr2       | ENSG00000030419 | Silent          | c.519G>A                |
| 1417   | IKZF3     | chr17      | ENSG00000161405 | 3'UTR           | c.*4471del              |
| 1418   | IL16      | chr15      | ENSG00000172349 | Intron          | c.3149+24C>G            |
| 1419   | IL16      | chr15      | ENSG00000172349 | Silent          | c.3522G>T               |
| 1420   | IL17RD    | chr3       | ENSG00000144730 | 3'UTR           | c.*6122del              |
| 1421   | IL17RD    | chr3       | ENSG00000144730 | 3'UTR           | c.*3572G>A              |
| 1422   | IL17RD    | chr3       | ENSG00000144730 | Missense        | c.164A>G                |
| 1423   | IL17RE    | chr3       | ENSG00000163701 | Intron          | c.1073-56T>C            |
| 1424   | IL18R1    | chr2       | ENSG00000115604 | Frame shift del | c.601del                |
| 1425   | IL1F10    | chr2       | ENSG00000136697 | 3'UTR           | c.*105A>G               |
| 1426   | IL1RAP    | chr3       | ENSG00000196083 | 3'UTR           | c.*1692T>C              |
| 1427   | IL1RL1    | chr2       | ENSG00000115602 | 3'UTR           | c.*1315del              |
| 1428   | IL1RL2    | chr2       | ENSG00000115598 | Frame shift del | c.685del                |
| 1429   | IL1RL2    | chr2       | ENSG00000115598 | Frame shift del | c.685del                |

| Number | Gene name | Chromosome | Gene_ID         | Mutation        | Nucleotide substitution |
|--------|-----------|------------|-----------------|-----------------|-------------------------|
| 1430   | IL1RN     | chr2       | ENSG00000136689 | 3'UTR           | c.*490del               |
| 1431   | IL36RN    | chr2       | ENSG00000136695 | Missense        | c.304C>T                |
| 1432   | IL6ST     | chr5       | ENSG00000134352 | 3'UTR           | c.*5981del              |
| 1433   | IL6ST     | chr5       | ENSG00000134352 | 3'UTR           | c.*5842del              |
| 1434   | ILRUN     | chr6       | ENSG00000196821 | 3'UTR           | c.*324del               |
| 1435   | IMMT      | chr2       | ENSG00000132305 | Missense        | c.28G>A                 |
| 1436   | IMPDH1    | chr7       | ENSG00000106348 | Intron          | c.353+57G>A             |
| 1437   | ING3      | chr7       | ENSG00000071243 | 3'UTR           | c.*809G>A               |
| 1438   | ING3      | chr7       | ENSG00000071243 | Missense        | c.377T>C                |
| 1439   | INO80     | chr15      | ENSG00000128908 | 3'UTR           | c.*318A>G               |
| 1440   | INO80     | chr15      | ENSG00000128908 | Frame shift del | c.685del                |
| 1441   | INO80     | chr15      | ENSG00000128908 | Frame shift del | c.685del                |
| 1442   | INPP5B    | chr1       | ENSG00000204084 | 3'UTR           | c.*274del               |
| 1443   | INPP5K    | chr17      | ENSG00000132376 | Missense        | c.829T>C                |
| 1444   | INPPL1    | chr11      | ENSG00000165458 | Frame shift del | c.3466del               |
| 1445   | INPPL1    | chr11      | ENSG00000165458 | Frame shift del | c.3466del               |
| 1446   | INSC      | chr11      | ENSG00000188487 | 3'UTR           | c.*1079T>C              |
| 1447   | INSM2     | chr14      | ENSG00000168348 | Frame shift del | c.165del                |
| 1448   | INSM2     | chr14      | ENSG00000168348 | Frame shift del | c.165del                |
| 1449   | INSYN2A   | chr10      | ENSG00000188916 | 3'UTR           | c.*387del               |
| 1450   | INTS1     | chr7       | ENSG00000164880 | Missense        | c.6448C>A               |
| 1451   | INTS10    | chr8       | ENSG00000104613 | Intron          | c.1640-1076T>C          |
| 1452   | INVS      | chr9       | ENSG00000119509 | 3'UTR           | c.*994T>C               |
| 1453   | IPO9      | chr1       | ENSG00000198700 | 3'UTR           | c.*3414del              |
| 1454   | IPO9      | chr1       | ENSG00000198700 | 3'UTR           | c.*4609G>T              |
| 1455   | IQCE      | chr7       | ENSG00000106012 | 3'UTR           | c.*1685del              |
| 1456   | IQCE      | chr7       | ENSG00000106012 | 3'UTR           | c.*3828A>G              |
| 1457   | IQCG      | chr3       | ENSG00000114473 | Missense        | c.111A>G                |
| 1458   | IQSEC1    | chr3       | ENSG00000144711 | Missense        | c.2789C>T               |
| 1459   | IQSEC1    | chr3       | ENSG00000144711 | Silent          | c.1407C>T               |
| 1460   | IRAK3     | chr12      | ENSG00000090376 | 3'UTR           | c.*895del               |
| 1461   | IREB2     | chr15      | ENSG00000136381 | Intron          | c.1952-32del            |
| 1462   | IRF1      | chr5       | ENSG00000125347 | Missense        | c.134G>A                |
| 1463   | IRS2      | chr13      | ENSG00000185950 | Silent          | c.4002C>A               |
| 1464   | IRX2      | chr5       | ENSG00000170561 | Missense        | c.416A>G                |
| 1465   | ISCA1     | chr9       | ENSG00000135070 | Intron          | c.-213-29T>C            |
| 1466   | ISL2      | chr15      | ENSG00000159556 | Silent          | c.282G>A                |
| 1467   | ISLR2     | chr15      | ENSG00000167178 | Intron          | c.-187+800del           |
| 1468   | ISM1      | chr20      | ENSG00000101230 | 3'UTR           | c.*984A>G               |
| 1469   | ITCH      | chr20      | ENSG00000078747 | 3'UTR           | c.*1256T>C              |
| 1470   | ITGA11    | chr15      | ENSG00000137809 | Intron          | c.2212-26C>T            |
| 1471   | ITGA2     | chr5       | ENSG00000164171 | Intron          | c.1173+97G>T            |
| 1472   | ITGA2     | chr5       | ENSG00000164171 | 3'UTR           | c.*1906G>A              |
| 1473   | ITGA5     | chr12      | ENSG00000161638 | Silent          | c.2331C>T               |
| 1474   | ITGA5     | chr12      | ENSG00000161638 | 5'Flank         |                         |
| 1475   | ITGA9     | chr3       | ENSG00000144668 | Missense        | c.1537T>C               |
| 1476   | ITGA9     | chr3       | ENSG00000144668 | 3'UTR           | c.*1377A>G              |
| 1477   | ITGAV     | chr2       | ENSG00000138448 | Missense        | c.175A>G                |
| 1478   | ITGB1BP2  | chrX       | ENSG00000147166 | Missense        | c.863T>C                |
| 1479   | ITGB2     | chr21      | ENSG00000160255 | Silent          | c.2196C>T               |
| 1480   | ITGB2     | chr21      | ENSG00000160255 | 5'Flank         |                         |
| 1481   | ITGB4     | chr17      | ENSG00000132470 | Intron          | c.1990+38C>A            |
| 1482   | ITGB6     | chr2       | ENSG00000115221 | Missense        | c.1682G>C               |

| Number | Gene name | Chromosome | Gene_ID         | Mutation            | Nucleotide substitution |
|--------|-----------|------------|-----------------|---------------------|-------------------------|
| 1483   | ITIH5     | chr10      | ENSG00000123243 | Intron              | c.2032+16C>T            |
| 1484   | ITM2C     | chr2       | ENSG00000135916 | Missense            | c.283C>T                |
| 1485   | ITPR3     | chr6       | ENSG00000096433 | Intron              | c.4350+15G>T            |
| 1486   | ITSN1     | chr21      | ENSG00000205726 | Nonsense            | c.3712C>T               |
| 1487   | IVNS1ABP  | chr1       | ENSG00000116679 | 3'Flank             |                         |
| 1488   | JADE1     | chr4       | ENSG00000077684 | 3'UTR               | c.*1747del              |
| 1489   | JAKMIP1   | chr4       | ENSG00000152969 | Frame shift del     | c.2462del               |
| 1490   | JAKMIP1   | chr4       | ENSG00000152969 | Frame shift del     | c.2462del               |
| 1491   | JAM3      | chr11      | ENSG00000166086 | 3'UTR               | c.*1471del              |
| 1492   | JPH2      | chr20      | ENSG00000149596 | Missense            | c.164C>A                |
| 1493   | JPT2      | chr16      | ENSG00000206053 | 3'UTR               | c.*2601del              |
| 1494   | KAAG1     | chr6       | ENSG00000146049 | 5'UTR               | c.-342C>A               |
| 1495   | KALRN     | chr3       | ENSG00000160145 | Intron              | c.2341-41G>A            |
| 1496   | KANK1     | chr9       | ENSG00000107104 | 3'UTR               | c.*184A>G               |
| 1497   | KANK2     | chr19      | ENSG00000197256 | Silent              | c.1836A>G               |
| 1498   | KANSL1L   | chr2       | ENSG00000144445 | 3'UTR               | c.*469 *470del          |
| 1499   | KANSL3    | chr2       | ENSG00000114982 | 3'UTR               | c.*1520G>T              |
| 1500   | KAT6B     | chr10      | ENSG00000156650 | 3'UTR               | c.*5A>G                 |
| 1501   | KAT6B     | chr10      | ENSG00000156650 | Frame shift Ins     | c.862dup                |
| 1502   | KAT6B     | chr10      | ENSG00000156650 | Splice region       | c.1062-3T>C             |
| 1503   | KATNBL1   | chr15      | ENSG00000134152 | Missense            | c.631A>G                |
| 1504   | KAZN      | chr1       | ENSG00000189337 | 5'UTR               | c.-213del               |
| 1505   | KAZN      | chr1       | ENSG00000189337 | Silent              | c.1911C>T               |
| 1506   | KCNAB1    | chr3       | ENSG00000169282 | Missense            | c.226A>T                |
| 1507   | KCNB1     | chr20      | ENSG00000158445 | Intron              | c.97-35122 97-35121del  |
| 1508   | KCNC3     | chr19      | ENSG00000131398 | Translation Start S | c.1A>G                  |
| 1509   | KCNK3     | chr2       | ENSG00000171303 | 3'UTR               | c.*1834C>T              |
| 1510   | KCNK4     | chr11      | ENSG00000182450 | 3'UTR               | c.*152T>A               |
| 1511   | KCNK5     | chr6       | ENSG00000164626 | 3'UTR               | c.*324G>A               |
| 1512   | KCNQ5     | chr6       | ENSG00000185760 | Splice region       | c.921T>A                |
| 1513   | KCNQ5     | chr6       | ENSG00000185760 | 3'UTR               | c.*2207 *2225del        |
| 1514   | KCNT2     | chr1       | ENSG00000162687 | 3'UTR               | c.*1780T>C              |
| 1515   | KCNT2     | chr1       | ENSG00000162687 | Intron              | c.95+25810C>T           |
| 1516   | KCTD10    | chr12      | ENSG00000110906 | 5'UTR               | c.-508del               |
| 1517   | KCTD5     | chr16      | ENSG00000167977 | 5'Flank             |                         |
| 1518   | KCTD6     | chr3       | ENSG00000168301 | Missense            | c.146C>T                |
| 1519   | KCTD9     | chr8       | ENSG00000104756 | 3'UTR               | c.*1101del              |
| 1520   | KDM1A     | chr1       | ENSG00000004487 | 3'UTR               | c.*283del               |
| 1521   | KDM3B     | chr5       | ENSG00000120733 | Intron              | c.5205+20A>G            |
| 1522   | KDM4A     | chr1       | ENSG00000066135 | Intron              | c.429+59del             |
| 1523   | KDM4C     | chr9       | ENSG00000107077 | Missense            | c.2074A>T               |
| 1524   | KDM5A     | chr12      | ENSG00000073614 | Intron              | c.1149+36T>C            |
| 1525   | KDM6B     | chr17      | ENSG00000132510 | Missense            | c.961A>G                |
| 1526   | KDM7A     | chr7       | ENSG00000006459 | 3'UTR               | c.*860del               |
| 1527   | KDM7A     | chr7       | ENSG00000006459 | 3'UTR               | c.*352del               |
| 1528   | KHDRBS3   | chr8       | ENSG00000131773 | 5'UTR               | c.-22T>C                |
| 1529   | KHNYN     | chr14      | ENSG00000100441 | 3'UTR               | c.*1911del              |
| 1530   | KHSRP     | chr19      | ENSG00000088247 | 3'UTR               | c.*471del               |
| 1531   | KIAA0232  | chr4       | ENSG00000170871 | Silent              | c.1521G>A               |
| 1532   | KIAA0408  | chr6       | ENSG00000189367 | Missense            | c.929A>G                |
| 1533   | KIAA1109  | chr4       | ENSG00000138688 | Missense            | c.14779T>C              |
| 1534   | KIAA1217  | chr10      | ENSG00000120549 | Intron              | c.355-40A>T             |
| 1535   | KIAA1217  | chr10      | ENSG00000120549 | Intron              | c.1357+36C>T            |

| Number | Gene name | Chromosome | Gene_ID         | Mutation        | Nucleotide substitution  |
|--------|-----------|------------|-----------------|-----------------|--------------------------|
| 1536   | KIAA1257  | chr3       | ENSG00000114656 | 3'UTR           | c.*773C>A                |
| 1537   | KIAA1324  | chr1       | ENSG00000116299 | Missense        | c.436A>C                 |
| 1538   | KIAA1324  | chr1       | ENSG00000116299 | Missense        | c.2498C>T                |
| 1539   | KIAA1614  | chr1       | ENSG00000135835 | 3'UTR           | c.*5870G>A               |
| 1540   | KIAA1671  | chr22      | ENSG00000197077 | Missense        | c.3505C>T                |
| 1541   | KIAA2012  | chr2       | ENSG00000182329 | Intron          | c.1832-2427 1832-2425del |
| 1542   | KIAA2012  | chr2       | ENSG00000182329 | Intron          | c.1832-2435A>T           |
| 1543   | KIAA2013  | chr1       | ENSG00000116685 | 3'UTR           | c.*27C>A                 |
| 1544   | KIF13A    | chr6       | ENSG00000137177 | 3'UTR           | c.*444A>G                |
| 1545   | KIF13B    | chr8       | ENSG00000197892 | Silent          | c.2973C>T                |
| 1546   | KIF16B    | chr20      | ENSG00000089177 | Silent          | c.3573C>T                |
| 1547   | KIF17     | chr1       | ENSG00000117245 | Silent          | c.2655C>T                |
| 1548   | KIF19     | chr17      | ENSG00000196169 | Missense        | c.548G>A                 |
| 1549   | KIF1A     | chr2       | ENSG00000130294 | Silent          | c.3459C>T                |
| 1550   | KIF1B     | chr1       | ENSG00000054523 | Intron          | c.-79-4432del            |
| 1551   | KIF1B     | chr1       | ENSG00000054523 | 3'UTR           | c.*557del                |
| 1552   | KIF1C     | chr17      | ENSG00000129250 | Intron          | c.1666+17T>C             |
| 1553   | KIF26A    | chr14      | ENSG00000066735 | Missense        | c.4405G>A                |
| 1554   | KIF2A     | chr5       | ENSG00000068796 | Intron          | c.5-27del                |
| 1555   | KIF3B     | chr20      | ENSG00000101350 | 3'UTR           | c.*2708A>G               |
| 1556   | KIF4A     | chrX       | ENSG00000090889 | Intron          | c.3072+16C>T             |
| 1557   | KIF4B     | chr5       | ENSG00000226650 | 3'UTR           |                          |
| 1558   | KIF6      | chr6       | ENSG00000164627 | 3'UTR           | c.*1932del               |
| 1559   | KIFC2     | chr8       | ENSG00000167702 | Missense        | c.1834T>A                |
| 1560   | KIT       | chr4       | ENSG00000157404 | Missense        | c.1594G>A                |
| 1561   | KIT       | chr4       | ENSG00000157404 | 3'UTR           | c.*820T>C                |
| 1562   | KLF2      | chr19      | ENSG00000127528 | Frame shift del | c.503del                 |
| 1563   | KLF9      | chr9       | ENSG00000119138 | Missense        | c.245G>A                 |
| 1564   | KLHDC2    | chr14      | ENSG00000165516 | Missense        | c.662A>G                 |
| 1565   | KLHL17    | chr1       | ENSG00000187961 | 5'UTR           | c.-229T>C                |
| 1566   | KLHL18    | chr3       | ENSG00000114648 | Missense        | c.578T>C                 |
| 1567   | KLHL21    | chr1       | ENSG00000162413 | 3'UTR           | c.*282T>G                |
| 1568   | KLHL29    | chr2       | ENSG00000119771 | Intron          | c.-45-38264T>A           |
| 1569   | KLHL35    | chr11      | ENSG00000149243 | Silent          | c.297C>T                 |
| 1570   | KLHL4     | chrX       | ENSG00000102271 | Missense        | c.1288G>A                |
| 1571   | KLHL8     | chr4       | ENSG00000145332 | 3'UTR           | c.*2972A>C               |
| 1572   | KMT2A     | chr11      | ENSG00000118058 | Missense        | c.473G>A                 |
| 1573   | KMT2B     | chr19      | ENSG00000272333 | Nonsense        | c.3214C>T                |
| 1574   | KMT2D     | chr12      | ENSG00000167548 | In Frame Del    | c.11217 11222del         |
| 1575   | KMT2D     | chr12      | ENSG00000167548 | Missense        | c.7412G>A                |
| 1576   | KNDC1     | chr10      | ENSG00000171798 | Splice region   | c.4443+7A>G              |
| 1577   | KNG1      | chr3       | ENSG00000113889 | Missense        | c.1510G>A                |
| 1578   | KNTC1     | chr12      | ENSG00000184445 | Intron          | c.6031-951del            |
| 1579   | KPNA2     | chr17      | ENSG00000182481 | Intron          | c.1498-42T>C             |
| 1580   | KPNA6     | chr1       | ENSG00000025800 | Intron          | c.912-105del             |
| 1581   | KRAS      | chr12      | ENSG00000133703 | 3'UTR           | c.*3845del               |
| 1582   | KRAS      | chr12      | ENSG00000133703 | 3'UTR           | c.*2304T>C               |
| 1583   | KREMEN1   | chr22      | ENSG00000183762 | 3'UTR           | c.*1642 *1643del         |
| 1584   | KREMEN1   | chr22      | ENSG00000183762 | 3'UTR           | c.*713C>T                |
| 1585   | KRI1      | chr19      | ENSG00000129347 | Missense        | c.993 994delinsTT        |
| 1586   | KRI1      | chr19      | ENSG00000129347 | Missense        | c.993 994delinsTT        |
| 1587   | KRT10     | chr17      | ENSG00000186395 | Frame shift del | c.153del                 |
| 1588   | KRT10     | chr17      | ENSG00000186395 | Frame shift del | c.153del                 |

| Number | Gene name | Chromosome | Gene_ID         | Mutation      | Nucleotide substitution |
|--------|-----------|------------|-----------------|---------------|-------------------------|
| 1589   | KRT24     | chr17      | ENSG00000167916 | Missense      | c.956C>T                |
| 1590   | KRT35     | chr17      | ENSG00000197079 | Missense      | c.1223G>A               |
| 1591   | KRT83     | chr12      | ENSG00000170523 | 3'UTR         | c.*213A>G               |
| 1592   | KRT86     | chr12      | ENSG00000170442 | Intron        | c.-5+6045G>A            |
| 1593   | KRTAP26-1 | chr21      | ENSG00000197683 | Missense      | c.530A>G                |
| 1594   | KSR1      | chr17      | ENSG00000141068 | Missense      | c.140T>G                |
| 1595   | L1CAM     | chrX       | ENSG00000198910 | 3'UTR         | c.*992del               |
| 1596   | L3HYPDH   | chr14      | ENSG00000126790 | Missense      | c.215A>G                |
| 1597   | LAMA3     | chr18      | ENSG00000053747 | Intron        | c.786+17C>T             |
| 1598   | LAMA4     | chr6       | ENSG00000112769 | Missense      | c.1507G>A               |
| 1599   | LAMA5     | chr20      | ENSG00000130702 | Intron        | c.1477+3515del          |
| 1600   | LAMB1     | chr7       | ENSG00000091136 | Missense      | c.3605A>G               |
| 1601   | LAMB2     | chr3       | ENSG00000172037 | Splice region | c.1226-5G>A             |
| 1602   | LAMC3     | chr9       | ENSG00000050555 | 5'Flank       |                         |
| 1603   | LAMP2     | chrX       | ENSG00000005893 | 3'UTR         | c.*1738 *1741del        |
| 1604   | LAPTM4A   | chr2       | ENSG00000068697 | Intron        | c.433-33T>C             |
| 1605   | LAPTM4B   | chr8       | ENSG00000104341 | 3'UTR         | c.*1475del              |
| 1606   | LAPTM4B   | chr8       | ENSG00000104341 | 3'UTR         | c.*1471A>G              |
| 1607   | LARP1     | chr5       | ENSG00000155506 | 3'UTR         | c.*2934 *2937del        |
| 1608   | LARP1     | chr5       | ENSG00000155506 | 3'UTR         | c.*2936 *2937del        |
| 1609   | LARP4     | chr12      | ENSG00000161813 | Intron        | c.322+12G>C             |
| 1610   | LARP4     | chr12      | ENSG00000161813 | 3'UTR         | c.*1158T>A              |
| 1611   | LARP6     | chr15      | ENSG00000166173 | Silent        | c.715C>T                |
| 1612   | LAT2      | chr7       | ENSG00000086730 | Intron        | c.-29-35A>G             |
| 1613   | LATS1     | chr6       | ENSG00000131023 | 3'UTR         | c.*2265dup              |
| 1614   | LATS1     | chr6       | ENSG00000131023 | Missense      | c.1459A>G               |
| 1615   | LBX2      | chr2       | ENSG00000179528 | 3'UTR         | c.*580del               |
| 1616   | LCT       | chr2       | ENSG00000115850 | Silent        | c.3360C>A               |
| 1617   | LDAH      | chr2       | ENSG00000118961 | 3'UTR         | c.*906A>G               |
| 1618   | LDHAL6B   | chr15      | ENSG00000171989 | Silent        | c.462G>A                |
| 1619   | LDLR      | chr19      | ENSG00000130164 | 3'UTR         | c.*1419 *1423del        |
| 1620   | LEPROTL1  | chr8       | ENSG00000104660 | Silent        | c.387A>G                |
| 1621   | LETMD1    | chr12      | ENSG00000050426 | 5'UTR         | c.-138C>A               |
| 1622   | LGALS8    | chr1       | ENSG00000116977 | Intron        | c.-104+307G>A           |
| 1623   | LGMN      | chr14      | ENSG00000100600 | Intron        | c.1192-56A>C            |
| 1624   | LGR6      | chr1       | ENSG00000133067 | Intron        | c.981-76T>C             |
| 1625   | LHCGR     | chr2       | ENSG00000138039 | Missense      | c.1258T>C               |
| 1626   | LHX4      | chr1       | ENSG00000121454 | 3'UTR         | c.*4013C>A              |
| 1627   | LHX8      | chr1       | ENSG00000162624 | 5'UTR         | c.-405G>C               |
| 1628   | LIMCH1    | chr4       | ENSG00000064042 | Splice region | c.238-8C>T              |
| 1629   | LIMD1     | chr3       | ENSG00000144791 | 3'UTR         | c.*3966del              |
| 1630   | LIMS1     | chr2       | ENSG00000169756 | 3'UTR         | c.*2790 *2791del        |
| 1631   | LINC00479 | chr21      | ENSG00000236384 | Intron        | n.317+42T>C             |
| 1632   | LINC00583 | chr9       | ENSG00000205636 | Intron        | n.92-21T>C              |
| 1633   | LINC00862 | chr1       | ENSG00000203721 | RNA           | n.1437del               |
| 1634   | LINC00943 | chr12      | ENSG00000189238 | RNA           | n.933T>A                |
| 1635   | LINC01151 | chr8       | ENSG00000253819 | Intron        | n.211-16del             |
| 1636   | LINC01341 | chr1       | ENSG00000227953 | RNA           | n.198C>T                |
| 1637   | LINC01553 | chr10      | ENSG00000235931 | RNA           | n.3955del               |
| 1638   | LINC01558 | chr6       | ENSG00000146521 | RNA           | n.300C>T                |
| 1639   | LINC01588 | chr14      | ENSG00000214900 | RNA           | n.457C>G                |
| 1640   | LINC01674 | chr21      | ENSG00000228159 | Intron        | n.166-1130C>T           |
| 1641   | LINC02272 | chr4       | ENSG00000251283 | RNA           | n.393del                |

| Number | Gene name | Chromosome | Gene_ID         | Mutation        | Nucleotide substitution  |
|--------|-----------|------------|-----------------|-----------------|--------------------------|
| 1642   | LINC02832 | chr2       | ENSG00000227308 | Intron          | n.119-15784 119-15783del |
| 1643   | LINGO1    | chr15      | ENSG00000169783 | Missense        | c.1417C>T                |
| 1644   | LINS1     | chr15      | ENSG00000140471 | 3'UTR           | c.*981T>C                |
| 1645   | LIPT1     | chr2       | ENSG00000144182 | 3'UTR           |                          |
| 1646   | LLPH      | chr12      | ENSG00000139233 | 3'UTR           | c.*705del                |
| 1647   | LMBRD1    | chr6       | ENSG00000168216 | Splice region   | c.865-4del               |
| 1648   | LMBRD2    | chr5       | ENSG00000164187 | Frame shift del | c.2086del                |
| 1649   | LMF1      | chr16      | ENSG00000103227 | Splice region   | c.*46+6T>C               |
| 1650   | LMNTD1    | chr12      | ENSG00000152936 | Missense        | c.67T>C                  |
| 1651   | LMO4      | chr1       | ENSG00000143013 | Intron          | c.333+27 333+28insA      |
| 1652   | LMO4      | chr1       | ENSG00000143013 | 3'UTR           | c.*1872del               |
| 1653   | LMTK2     | chr7       | ENSG00000164715 | 3'UTR           | c.*740T>C                |
| 1654   | LMTK3     | chr19      | ENSG00000142235 | Missense        | c.3584C>T                |
| 1655   | LONP2     | chr16      | ENSG00000102910 | 3'UTR           | c.*2277T>G               |
| 1656   | LONP2     | chr16      | ENSG00000102910 | 3'UTR           | c.*2720del               |
| 1657   | LOXL3     | chr2       | ENSG00000115318 | Frame shift del | c.824del                 |
| 1658   | LOXL3     | chr2       | ENSG00000115318 | Frame shift del | c.824del                 |
| 1659   | LOXL3     | chr2       | ENSG00000115318 | Silent          | c.804C>T                 |
| 1660   | LPAR4     | chrX       | ENSG00000147145 | 3'UTR           | c.*1108 *1109del         |
| 1661   | LPIN2     | chr18      | ENSG00000101577 | Intron          | c.2175-72T>G             |
| 1662   | LPL       | chr8       | ENSG00000175445 | Intron          | c.1323-17T>A             |
| 1663   | LPP       | chr3       | ENSG00000145012 | 3'UTR           | c.*112C>T                |
| 1664   | LPP       | chr3       | ENSG00000145012 | 3'UTR           | c.*3203del               |
| 1665   | LPP       | chr3       | ENSG00000145012 | 3'UTR           | c.*4078C>T               |
| 1666   | LPP       | chr3       | ENSG00000145012 | 3'UTR           | c.*13433A>G              |
| 1667   | LPP       | chr3       | ENSG00000145012 | 3'UTR           | c.*15515del              |
| 1668   | LRATD1    | chr2       | ENSG00000162981 | 3'UTR           | c.*3208del               |
| 1669   | LRCH1     | chr13      | ENSG00000136141 | 3'UTR           | c.*1615A>G               |
| 1670   | LRIG2     | chr1       | ENSG00000198799 | 3'UTR           | c.*570del                |
| 1671   | LRIG3     | chr12      | ENSG00000139263 | Intron          | c.236+409T>C             |
| 1672   | LRP1      | chr12      | ENSG00000123384 | Intron          | c.841+3488del            |
| 1673   | LRP1B     | chr2       | ENSG00000168702 | Silent          | c.4839C>T                |
| 1674   | LRP1B     | chr2       | ENSG00000168702 | Missense        | c.3124T>C                |
| 1675   | LRP4      | chr11      | ENSG00000134569 | Intron          | c.5155+99T>G             |
| 1676   | LRP5      | chr11      | ENSG00000162337 | 3'Flank         |                          |
| 1677   | LRP6      | chr12      | ENSG00000070018 | 3'UTR           | c.*1771del               |
| 1678   | LRP8      | chr1       | ENSG00000157193 | Silent          | c.624C>T                 |
| 1679   | LRR1      | chr14      | ENSG00000165501 | Missense        | c.34C>T                  |
| 1680   | LRR28     | chr15      | ENSG00000168904 | 3'UTR           | c.*1370A>G               |
| 1681   | LRR31     | chr3       | ENSG00000114248 | 3'UTR           | c.*205A>G                |
| 1682   | LRR36     | chr16      | ENSG00000159708 | Silent          | c.1485A>G                |
| 1683   | LRR37A3   | chr17      | ENSG00000176809 | Missense        | c.268T>C                 |
| 1684   | LRR37B    | chr17      | ENSG00000185158 | Intron          | c.2205-4275T>C           |
| 1685   | LRR45     | chr17      | ENSG00000169683 | Frame shift del | c.1436 1442del           |
| 1686   | LRR45     | chr17      | ENSG00000169683 | Frame shift del | c.1436 1442del           |
| 1687   | LRR47     | chr1       | ENSG00000130764 | Silent          | c.561T>C                 |
| 1688   | LRR49     | chr15      | ENSG00000137821 | Frame shift Ins | c.101dup                 |
| 1689   | LRR7      | chr1       | ENSG00000033122 | Intron          | c.-76-14del              |
| 1690   | LRR7      | chr1       | ENSG00000033122 | Missense        | c.358A>G                 |
| 1691   | LRR72     | chr7       | ENSG00000205858 | Intron          | c.671-3del               |
| 1692   | LRR73     | chr6       | ENSG00000204052 | 5'UTR           | c.-846A>T                |
| 1693   | LRR9      | chr14      | ENSG00000131951 | Missense        | c.2416A>G                |
| 1694   | LRRFIP1   | chr2       | ENSG00000124831 | 3'UTR           | c.*1566del               |



| Number | Gene name | Chromosome | Gene_ID         | Mutation        | Nucleotide substitution |
|--------|-----------|------------|-----------------|-----------------|-------------------------|
| 1695   | LRRFIP2   | chr3       | ENSG00000093167 | Missense        | c.2012T>C               |
| 1696   | LRRK2     | chr12      | ENSG00000188906 | 3'UTR           | c.*936del               |
| 1697   | LRSAM1    | chr9       | ENSG00000148356 | Silent          | c.126A>C                |
| 1698   | LRSAM1    | chr9       | ENSG00000148356 | Missense        | c.640C>T                |
| 1699   | LSP1      | chr11      | ENSG00000130592 | Intron          | c.930+27G>A             |
| 1700   | LSR       | chr19      | ENSG00000105699 | Missense        | c.472A>T                |
| 1701   | LTB4R     | chr14      | ENSG00000213903 | 3'UTR           | c.*1263G>T              |
| 1702   | LTC4S     | chr5       | ENSG00000213316 | Missense        | c.41T>C                 |
| 1703   | LUC7L3    | chr17      | ENSG00000108848 | Intron          | c.206+33del             |
| 1704   | LUC7L3    | chr17      | ENSG00000108848 | Missense        | c.935G>A                |
| 1705   | LVRN      | chr5       | ENSG00000172901 | Intron          | c.2757-579del           |
| 1706   | LY6K      | chr8       | ENSG00000160886 | 5'Flank         |                         |
| 1707   | LY6K      | chr8       | ENSG00000160886 | 5'Flank         |                         |
| 1708   | LY75      | chr2       | ENSG00000054219 | Missense        | c.4417A>G               |
| 1709   | LY75      | chr2       | ENSG00000054219 | Frame shift del | c.4034del               |
| 1710   | LY75      | chr2       | ENSG00000054219 | Frame shift del | c.4034del               |
| 1711   | LYG2      | chr2       | ENSG00000185674 | Missense        | c.191G>A                |
| 1712   | LYNX1     | chr8       | ENSG00000180155 | 3'UTR           | c.*249G>A               |
| 1713   | LYPLA1    | chr8       | ENSG00000120992 | 3'UTR           | c.*664del               |
| 1714   | LYRM2     | chr6       | ENSG00000083099 | 3'UTR           | c.*2836del              |
| 1715   | LYRM7     | chr5       | ENSG00000186687 | Intron          | c.92-71A>C              |
| 1716   | LYST      | chr1       | ENSG00000143669 | Silent          | c.6000T>C               |
| 1717   | LZIC      | chr1       | ENSG00000162441 | Frame shift del | c.570del                |
| 1718   | LZIC      | chr1       | ENSG00000162441 | 5'UTR           | c.-4T>A                 |
| 1719   | LZTR1     | chr22      | ENSG00000099949 | 3'UTR           | c.*790C>T               |
| 1720   | LZTS2     | chr10      | ENSG00000107816 | Missense        | c.1709G>T               |
| 1721   | MACC1     | chr7       | ENSG00000183742 | 3'UTR           | c.*3530G>A              |
| 1722   | MACC1     | chr7       | ENSG00000183742 | Missense        | c.1826T>C               |
| 1723   | MACF1     | chr1       | ENSG00000127603 | Missense        | c.2698C>T               |
| 1724   | MACF1     | chr1       | ENSG00000127603 | 3'UTR           | c.*830del               |
| 1725   | MAFA      | chr8       | ENSG00000182759 | 3'UTR           | c.*888 *889del          |
| 1726   | MAFA      | chr8       | ENSG00000182759 | 3'UTR           | c.*878del               |
| 1727   | MAFB      | chr20      | ENSG00000204103 | Missense        | c.166T>C                |
| 1728   | MAFG      | chr17      | ENSG00000197063 | Silent          | c.60T>C                 |
| 1729   | MAGED1    | chrX       | ENSG00000179222 | Missense        | c.1057C>G               |
| 1730   | MAGI1     | chr3       | ENSG00000151276 | Silent          | c.4209C>T               |
| 1731   | MALAT1    | chr11      | ENSG00000251562 | Splice site     | n.392+2T>C              |
| 1732   | MALRD1    | chr10      | ENSG00000204740 | Intron          | c.996-42del             |
| 1733   | MALT1     | chr18      | ENSG00000172175 | 3'UTR           | c.*2380A>G              |
| 1734   | MALT1     | chr18      | ENSG00000172175 | 3'UTR           | c.*5351del              |
| 1735   | MAN1B1    | chr9       | ENSG00000177239 | Intron          | c.1255-250T>C           |
| 1736   | MAN1C1    | chr1       | ENSG00000117643 | 3'UTR           | c.*1178 *1179del        |
| 1737   | MAN2A1    | chr5       | ENSG00000112893 | 5'UTR           | c.-381del               |
| 1738   | MAN2A2    | chr15      | ENSG00000196547 | Missense        | c.1252G>A               |
| 1739   | MANBA     | chr4       | ENSG00000109323 | Silent          | c.459T>C                |
| 1740   | MAP2K7    | chr19      | ENSG00000076984 | 3'UTR           | c.*1349del              |
| 1741   | MAP3K13   | chr3       | ENSG00000073803 | 3'UTR           | c.*3404A>C              |
| 1742   | MAP3K2    | chr2       | ENSG00000169967 | 3'UTR           | c.*4252del              |
| 1743   | MAP3K20   | chr2       | ENSG00000091436 | 3'UTR           | c.*4389 *4390dup        |
| 1744   | MAP3K4    | chr6       | ENSG00000085511 | Intron          | c.3416-9del             |
| 1745   | MAP3K6    | chr1       | ENSG00000142733 | Silent          | c.1887G>A               |
| 1746   | MAP3K9    | chr14      | ENSG00000006432 | 5'UTR           | c.-91dup                |
| 1747   | MAP4      | chr3       | ENSG00000047849 | Silent          | c.762A>G                |

| Number | Gene name | Chromosome | Gene_ID         | Mutation          | Nucleotide substitution |
|--------|-----------|------------|-----------------|-------------------|-------------------------|
| 1748   | MAP4      | chr3       | ENSG00000047849 | Intron            | c.420+1495dup           |
| 1749   | MAP4      | chr3       | ENSG00000047849 | 3'UTR             | c.*692 *693del          |
| 1750   | MAP4K2    | chr11      | ENSG00000168067 | Intron            | c.414+40del             |
| 1751   | MAP4K3    | chr2       | ENSG00000011566 | Splice region     | c.1795-7del             |
| 1752   | MAP4K3    | chr2       | ENSG00000011566 | Splice region     | c.662+4A>G              |
| 1753   | MAP4K5    | chr14      | ENSG00000012983 | 3'UTR             | c.*270del               |
| 1754   | MAP6      | chr11      | ENSG00000171533 | Missense          | c.1423G>T               |
| 1755   | MAPK13    | chr6       | ENSG00000156711 | 3'UTR             | c.*60A>G                |
| 1756   | MAPK6     | chr15      | ENSG00000069956 | Missense          | c.1220A>G               |
| 1757   | MAPK8IP1  | chr11      | ENSG00000121653 | 3'UTR             | c.*537C>T               |
| 1758   | MARK2     | chr11      | ENSG00000072518 | Intron            | c.1769+17G>C            |
| 1759   | MARK2     | chr11      | ENSG00000072518 | Intron            | c.1769+27G>A            |
| 1760   | MAST1     | chr19      | ENSG00000105613 | Missense          | c.1106C>T               |
| 1761   | MAST4     | chr5       | ENSG00000069020 | Intron            | c.3386-49del            |
| 1762   | MAT2B     | chr5       | ENSG00000038274 | Intron            | c.225+502del            |
| 1763   | MATN2     | chr8       | ENSG00000132561 | 3'UTR             | c.*84G>A                |
| 1764   | MATN3     | chr2       | ENSG00000132031 | Frame shift del   | c.1159del               |
| 1765   | MATN3     | chr2       | ENSG00000132031 | Frame shift del   | c.1159del               |
| 1766   | MBL2      | chr10      | ENSG00000165471 | 3'UTR             | c.*358G>A               |
| 1767   | MBNL3     | chrX       | ENSG00000076770 | 3'UTR             | c.*1857 *1858dup        |
| 1768   | MBP       | chr18      | ENSG00000197971 | Splice site       | c.870+2T>C              |
| 1769   | MC4R      | chr18      | ENSG00000166603 | Missense          | c.867A>G                |
| 1770   | MCAT      | chr22      | ENSG00000100294 | Missense          | c.845C>T                |
| 1771   | MCC       | chr5       | ENSG00000171444 | 5'UTR             | c.-243T>C               |
| 1772   | MCCC2     | chr5       | ENSG00000131844 | Silent            | c.711T>C                |
| 1773   | MCCC2     | chr5       | ENSG00000131844 | 3'UTR             | c.*1167A>G              |
| 1774   | MCFD2     | chr2       | ENSG00000180398 | 3'UTR             | c.*94C>G                |
| 1775   | MCHR1     | chr22      | ENSG00000128285 | 3'UTR             | c.*822T>G               |
| 1776   | MCM3AP    | chr21      | ENSG00000160294 | Missense          | c.416T>G                |
| 1777   | MCM6      | chr2       | ENSG00000076003 | 3'UTR             | c.*309A>G               |
| 1778   | MCM7      | chr7       | ENSG00000166508 | Silent            | c.1407T>C               |
| 1779   | MCMDC2    | chr8       | ENSG00000178460 | Intron            | c.226-15del             |
| 1780   | MCRIP2    | chr16      | ENSG00000172366 | Intron            | c.413-68T>A             |
| 1781   | MCRS1     | chr12      | ENSG00000187778 | Splice region     | c.430-5del              |
| 1782   | MCTP1     | chr5       | ENSG00000175471 | 3'UTR             | c.*1851A>C              |
| 1783   | MCTP2     | chr15      | ENSG00000140563 | Intron            | c.970-1053del           |
| 1784   | MCTP2     | chr15      | ENSG00000140563 | 3'UTR             | c.*1299 *1300del        |
| 1785   | MDFIC     | chr7       | ENSG00000135272 | 5'UTR             | c.-131del               |
| 1786   | MDFIC     | chr7       | ENSG00000135272 | 3'UTR             | c.*1488T>G              |
| 1787   | MDGA1     | chr6       | ENSG00000112139 | 3'UTR             | c.*24del                |
| 1788   | MDGA1     | chr6       | ENSG00000112139 | Intron            | c.178-25G>C             |
| 1789   | MDGA2     | chr14      | ENSG00000139915 | Frame shift del   | c.83del                 |
| 1790   | MDH1B     | chr2       | ENSG00000138400 | anslation_Start_S | c.2T>C                  |
| 1791   | MDM2      | chr12      | ENSG00000135679 | Intron            | c.174+936del            |
| 1792   | MDN1      | chr6       | ENSG00000112159 | Intron            | c.7898+10A>G            |
| 1793   | MDN1      | chr6       | ENSG00000112159 | Intron            | c.5350-25del            |
| 1794   | MECOM     | chr3       | ENSG00000085276 | Missense          | c.2696C>T               |
| 1795   | MECP2     | chrX       | ENSG00000169057 | 3'UTR             | c.*4508A>G              |
| 1796   | MECP2     | chrX       | ENSG00000169057 | Intron            | c.26+15T>C              |
| 1797   | MED1      | chr17      | ENSG00000125686 | Splice region     | c.852-5del              |
| 1798   | MED23     | chr6       | ENSG00000112282 | Splice region     | c.285-5del              |
| 1799   | MED28     | chr4       | ENSG00000118579 | 3'UTR             | c.*5754G>A              |
| 1800   | MEF2C     | chr5       | ENSG00000081189 | 3'UTR             | c.*592del               |

| Number | Gene name | Chromosome | Gene_ID         | Mutation        | Nucleotide substitution |
|--------|-----------|------------|-----------------|-----------------|-------------------------|
| 1801   | MEF2D     | chr1       | ENSG00000116604 | 3'UTR           | c.*2551T>G              |
| 1802   | MEGF6     | chr1       | ENSG00000162591 | Intron          | c.1738+27 1738+28del    |
| 1803   | MEIS1     | chr2       | ENSG00000143995 | 3'UTR           | c.*518del               |
| 1804   | MEN1      | chr11      | ENSG00000133895 | Intron          | c.446-11C>A             |
| 1805   | MEPE      | chr4       | ENSG00000152595 | Frame shift del | c.694del                |
| 1806   | MEPE      | chr4       | ENSG00000152595 | Frame shift del | c.694del                |
| 1807   | MESD      | chr15      | ENSG00000117899 | Frame shift del | c.632del                |
| 1808   | MESD      | chr15      | ENSG00000117899 | Frame shift del | c.632del                |
| 1809   | MESP2     | chr15      | ENSG00000188095 | Intron          | c.30+43del              |
| 1810   | METAP2    | chr12      | ENSG00000111142 | 3'UTR           | c.*378G>C               |
| 1811   | METTL23   | chr17      | ENSG00000181038 | Missense        | c.34C>A                 |
| 1812   | METTL7A   | chr12      | ENSG00000185432 | 3'UTR           | c.*95del                |
| 1813   | MEX3B     | chr15      | ENSG00000183496 | 5'UTR           | c.-292C>T               |
| 1814   | MFAP1     | chr15      | ENSG00000140259 | Missense        | c.71A>G                 |
| 1815   | MFSD1     | chr3       | ENSG00000118855 | Missense        | c.1249T>C               |
| 1816   | MFSD12    | chr19      | ENSG00000161091 | Silent          | c.483T>C                |
| 1817   | MFSD4A    | chr1       | ENSG00000174514 | 3'UTR           | c.*1587T>C              |
| 1818   | MFSD4B    | chr6       | ENSG00000173214 | 3'UTR           | c.*2412del              |
| 1819   | MGAM      | chr7       | ENSG00000257335 | Missense        | c.1397G>T               |
| 1820   | MGAT3     | chr22      | ENSG00000128268 | Missense        | c.1541G>A               |
| 1821   | MGAT5B    | chr17      | ENSG00000167889 | Missense        | c.307G>A                |
| 1822   | MGAT5B    | chr17      | ENSG00000167889 | Missense        | c.1355G>A               |
| 1823   | MGAT5B    | chr17      | ENSG00000167889 | Intron          | c.2174+14del            |
| 1824   | MIA2      | chr14      | ENSG00000150527 | Intron          | c.384+43del             |
| 1825   | MIB1      | chr18      | ENSG00000101752 | 3'UTR           | c.*5875T>C              |
| 1826   | MICAL1    | chr6       | ENSG00000135596 | Intron          | c.1686+52del            |
| 1827   | MICAL3    | chr22      | ENSG00000243156 | Frame shift del | c.4495del               |
| 1828   | MICALL2   | chr7       | ENSG00000164877 | Missense        | c.1151T>C               |
| 1829   | MIEF1     | chr22      | ENSG00000100335 | Splice region   | c.586-8C>A              |
| 1830   | MIER3     | chr5       | ENSG00000155545 | 3'UTR           | c.*198A>G               |
| 1831   | MINDY4    | chr7       | ENSG00000106125 | Intron          | c.2226-37T>C            |
| 1832   | MINPP1    | chr10      | ENSG00000107789 | Intron          | c.835+4582del           |
| 1833   | MIR200A   | chr1       | ENSG00000207607 | RNA             | n.28C>T                 |
| 1834   | MIR4275   | chr4       | ENSG00000283275 | 5'Flank         |                         |
| 1835   | MIR4457   | chr5       | ENSG00000263670 | 3'Flank         |                         |
| 1836   | MIS18A    | chr21      | ENSG00000159055 | Silent          | c.591C>T                |
| 1837   | MKI67     | chr10      | ENSG00000148773 | 3'UTR           | c.*2109C>T              |
| 1838   | MLF2      | chr12      | ENSG00000089693 | Intron          | c.180+52A>G             |
| 1839   | MLH1      | chr3       | ENSG00000076242 | Intron          | c.207+41A>G             |
| 1840   | MME       | chr3       | ENSG00000196549 | 3'UTR           | c.*1469del              |
| 1841   | MME       | chr3       | ENSG00000196549 | 3'UTR           | c.*1894C>T              |
| 1842   | MMP12     | chr11      | ENSG00000262406 | Missense        | c.1205G>T               |
| 1843   | MMP19     | chr12      | ENSG00000123342 | 3'UTR           | c.*486A>G               |
| 1844   | MNX1      | chr7       | ENSG00000130675 | Frame shift del | c.53del                 |
| 1845   | MNX1      | chr7       | ENSG00000130675 | Frame shift del | c.53del                 |
| 1846   | MOB1A     | chr2       | ENSG00000114978 | Intron          | c.15-451del             |
| 1847   | MOB1B     | chr4       | ENSG00000173542 | 3'UTR           | c.*5450del              |
| 1848   | MOB1B     | chr4       | ENSG00000173542 | 3'UTR           | c.*6050 *6051del        |
| 1849   | MOB3B     | chr9       | ENSG00000120162 | 3'UTR           | c.*4987C>A              |
| 1850   | MON1B     | chr16      | ENSG00000103111 | Intron          | c.476-23dup             |
| 1851   | MON2      | chr12      | ENSG00000061987 | Intron          | c.2119-11del            |
| 1852   | MON2      | chr12      | ENSG00000061987 | 3'Flank         |                         |
| 1853   | MOSPD1    | chrX       | ENSG00000101928 | 3'UTR           | c.*639del               |

| Number | Gene name | Chromosome | Gene_ID         | Mutation        | Nucleotide substitution |
|--------|-----------|------------|-----------------|-----------------|-------------------------|
| 1854   | MOXD1     | chr6       | ENSG00000079931 | 3'UTR           | c.*257dup               |
| 1855   | MOXD1     | chr6       | ENSG00000079931 | 3'UTR           | c.*774A>G               |
| 1856   | MPDZ      | chr9       | ENSG00000107186 | 5'UTR           | c.-200T>C               |
| 1857   | MPP5      | chr14      | ENSG00000072415 | 3'UTR           | c.*637dup               |
| 1858   | MPRIP     | chr17      | ENSG00000133030 | Frame shift del | c.1058del               |
| 1859   | MPRIP     | chr17      | ENSG00000133030 | Frame shift del | c.1058del               |
| 1860   | MPZL3     | chr11      | ENSG00000160588 | 3'UTR           | c.*1664del              |
| 1861   | MREG      | chr2       | ENSG00000118242 | Intron          | c.95+69C>A              |
| 1862   | MRNIP     | chr5       | ENSG00000161010 | 5'Flank         |                         |
| 1863   | MROH2A    | chr2       | ENSG00000185038 | Missense        | c.3577A>G               |
| 1864   | MROH2A    | chr2       | ENSG00000185038 | Missense        | c.4578G>T               |
| 1865   | MROH7     | chr1       | ENSG00000184313 | Missense        | c.1943C>T               |
| 1866   | MROH8     | chr20      | ENSG00000101353 | Intron          | c.2772-36T>C            |
| 1867   | MRPL12    | chr17      | ENSG00000262814 | 5'UTR           | c.-18del                |
| 1868   | MRPL19    | chr2       | ENSG00000115364 | 3'UTR           | c.*2588del              |
| 1869   | MRPL28    | chr16      | ENSG00000086504 | 3'UTR           | c.*470del               |
| 1870   | MRPL35    | chr2       | ENSG00000132313 | 3'UTR           | c.*66 *67ins            |
| 1871   | MRPL35    | chr2       | ENSG00000132313 | 3'UTR           | c.*68 *69ins            |
| 1872   | MRPL42    | chr12      | ENSG00000198015 | 3'UTR           | c.*2343dup              |
| 1873   | MRPL42    | chr12      | ENSG00000198015 | 3'UTR           | c.*2477del              |
| 1874   | MRPL9     | chr1       | ENSG00000143436 | 3'UTR           | c.*189A>G               |
| 1875   | MRPS10    | chr6       | ENSG00000048544 | 3'UTR           | c.*375del               |
| 1876   | MRPS10    | chr6       | ENSG00000048544 | Splice region   | c.523-3del              |
| 1877   | MRPS31    | chr13      | ENSG00000102738 | Missense        | c.317T>C                |
| 1878   | MRTO4     | chr1       | ENSG00000053372 | 3'UTR           | c.*445 *447del          |
| 1879   | MSL3P1    | chr2       | ENSG00000224287 | RNA             | n.889C>T                |
| 1880   | MSRB3     | chr12      | ENSG00000174099 | 3'UTR           | c.*520del               |
| 1881   | MSTO1     | chr1       | ENSG00000125459 | Missense        | c.1282A>G               |
| 1882   | MTA3      | chr2       | ENSG00000057935 | Missense        | c.38A>G                 |
| 1883   | MTAP      | chr9       | ENSG00000099810 | Frame shift del | c.622del                |
| 1884   | MTAP      | chr9       | ENSG00000099810 | Frame shift del | c.622del                |
| 1885   | MTCH1     | chr6       | ENSG00000137409 | Intron          | c.407-39A>G             |
| 1886   | MTCL1     | chr18      | ENSG00000168502 | Intron          | c.4145+17A>G            |
| 1887   | MTERF1    | chr7       | ENSG00000127989 | Frame shift del | c.729del                |
| 1888   | MTERF1    | chr7       | ENSG00000127989 | Frame shift del | c.729del                |
| 1889   | MTF1      | chr1       | ENSG00000188786 | Intron          | c.1068+4071del          |
| 1890   | MTFMT     | chr15      | ENSG00000103707 | 3'UTR           | c.*503del               |
| 1891   | MTFR1     | chr8       | ENSG00000066855 | Intron          | c.281+47del             |
| 1892   | MTFR2     | chr6       | ENSG00000146410 | 3'UTR           | c.*169T>G               |
| 1893   | MTHFD1L   | chr6       | ENSG00000120254 | Missense        | c.2068T>G               |
| 1894   | MTHFD1L   | chr6       | ENSG00000120254 | 3'UTR           | c.*223C>T               |
| 1895   | MTHFD1L   | chr6       | ENSG00000120254 | Missense        | c.2601C>A               |
| 1896   | MTO1      | chr6       | ENSG00000135297 | 3'UTR           | c.*3831A>T              |
| 1897   | MTR       | chr1       | ENSG00000116984 | 3'UTR           | c.*2744T>C              |
| 1898   | MTSS1     | chr8       | ENSG00000170873 | Intron          | c.1048-13del            |
| 1899   | MTUS1     | chr8       | ENSG00000129422 | 3'UTR           | c.*413del               |
| 1900   | MUC17     | chr7       | ENSG00000169876 | Missense        | c.12595T>G              |
| 1901   | MUC19     | chr12      | ENSG00000205592 | Intron          | n.315+47del             |
| 1902   | MUC19     | chr12      | ENSG00000205592 | RNA             | n.514del                |
| 1903   | MUC19     | chr12      | ENSG00000205592 | Intron          | n.4063+26del            |
| 1904   | MUC19     | chr12      | ENSG00000205592 | RNA             | n.5543T>C               |
| 1905   | MVB12A    | chr19      | ENSG00000141971 | Intron          | c.414-43C>A             |
| 1906   | MXD1      | chr2       | ENSG00000059728 | 3'UTR           | c.*800del               |

| Number | Gene name | Chromosome | Gene_ID         | Mutation      | Nucleotide substitution  |
|--------|-----------|------------|-----------------|---------------|--------------------------|
| 1907   | MYADML2   | chr17      | ENSG00000185105 | 3'UTR         | c.*790C>T                |
| 1908   | MYBPC3    | chr11      | ENSG00000134571 | Missense      | c.3299A>G                |
| 1909   | MYBPHL    | chr1       | ENSG00000221986 | Splice region | c.145+8A>G               |
| 1910   | MYH7B     | chr20      | ENSG00000078814 | Missense      | c.649A>G                 |
| 1911   | MYLK      | chr3       | ENSG00000065534 | Missense      | c.2350T>C                |
| 1912   | MYLK4     | chr6       | ENSG00000145949 | Intron        | c.888-40C>T              |
| 1913   | MYO18A    | chr17      | ENSG00000196535 | Missense      | c.5092A>G                |
| 1914   | MYO18A    | chr17      | ENSG00000196535 | Intron        | c.1729-48T>C             |
| 1915   | MYO18B    | chr22      | ENSG00000133454 | Missense      | c.4771C>A                |
| 1916   | MYO1C     | chr17      | ENSG00000197879 | Silent        | c.771A>G                 |
| 1917   | MYO3A     | chr10      | ENSG00000095777 | 3'UTR         | c.*1375A>C               |
| 1918   | MYO3B     | chr2       | ENSG00000071909 | Silent        | c.414C>T                 |
| 1919   | MYO5A     | chr15      | ENSG00000197535 | Missense      | c.2708G>A                |
| 1920   | MYO7A     | chr11      | ENSG00000137474 | Missense      | c.3891G>T                |
| 1921   | MYOF      | chr10      | ENSG00000138119 | Intron        | c.4210+48 4210+49ins     |
| 1922   | MYOT      | chr5       | ENSG00000120729 | 3'UTR         | c.*272A>G                |
| 1923   | MYRFL     | chr12      | ENSG00000166268 | Intron        | c.666+58del              |
| 1924   | N4BP2     | chr4       | ENSG00000078177 | Splice region | c.1820+11del             |
| 1925   | N6AMT1    | chr21      | ENSG00000156239 | 3'UTR         | c.*3593T>C               |
| 1926   | NAA15     | chr4       | ENSG00000164134 | Silent        | c.84T>C                  |
| 1927   | NAA30     | chr14      | ENSG00000139977 | 3'UTR         | c.*959C>T                |
| 1928   | NACC2     | chr9       | ENSG00000148411 | 3'UTR         | c.*4690 *4691del         |
| 1929   | NACC2     | chr9       | ENSG00000148411 | Intron        | c.886+13283del           |
| 1930   | NAIF1     | chr9       | ENSG00000171169 | Missense      | c.161G>T                 |
| 1931   | NANP      | chr20      | ENSG00000170191 | 3'UTR         | c.*941 *942del           |
| 1932   | NASP      | chr1       | ENSG00000132780 | Intron        | c.60-40T>C               |
| 1933   | NAT10     | chr11      | ENSG00000135372 | Missense      | c.511T>C                 |
| 1934   | NAT16     | chr7       | ENSG00000167011 | 3'UTR         | c.*711 *712del           |
| 1935   | NAV1      | chr1       | ENSG00000134369 | 3'UTR         | c.*6063dup               |
| 1936   | NAV2      | chr11      | ENSG00000166833 | Intron        | c.268-55067 268-55066del |
| 1937   | NAV2      | chr11      | ENSG00000166833 | Intron        | c.770+4057del            |
| 1938   | NAV2      | chr11      | ENSG00000166833 | 3'UTR         | c.*1574del               |
| 1939   | NBEAL2    | chr3       | ENSG00000160796 | Missense      | c.1060G>A                |
| 1940   | NCAPD2    | chr12      | ENSG00000010292 | Intron        | c.3965-17T>C             |
| 1941   | NCBP1     | chr9       | ENSG00000136937 | 3'UTR         | c.*833T>C                |
| 1942   | NCDN      | chr1       | ENSG00000020129 | Silent        | c.1656G>A                |
| 1943   | NCF2      | chr1       | ENSG00000116701 | Intron        | c.856-85del              |
| 1944   | NCOA2     | chr8       | ENSG00000140396 | 3'UTR         | c.*2744del               |
| 1945   | NCOA7     | chr6       | ENSG00000111912 | Missense      | c.1967A>C                |
| 1946   | NCOA7     | chr6       | ENSG00000111912 | 3'UTR         | c.*1359G>T               |
| 1947   | NCOA7     | chr6       | ENSG00000111912 | 3'UTR         | c.*1610 *1612dup         |
| 1948   | NDOR1     | chr9       | ENSG00000188566 | Silent        | c.1011A>G                |
| 1949   | NDRG1     | chr8       | ENSG00000104419 | Intron        | c.206-30del              |
| 1950   | NDUFA11   | chr19      | ENSG00000174886 | Missense      | c.220A>G                 |
| 1951   | NEB       | chr2       | ENSG00000183091 | Intron        | c.18138+17G>A            |
| 1952   | NEBL      | chr10      | ENSG00000078114 | Intron        | c.798+56del              |
| 1953   | NEFM      | chr8       | ENSG00000104722 | 5'Flank       |                          |
| 1954   | NEGR1     | chr1       | ENSG00000172260 | 3'UTR         | c.*3281del               |
| 1955   | NEGR1     | chr1       | ENSG00000172260 | Splice region | c.556+4A>C               |
| 1956   | NEK4      | chr3       | ENSG00000114904 | In Frame Del  | c.742 744del             |
| 1957   | NEK5      | chr13      | ENSG00000197168 | Splice region | c.1573-3del              |
| 1958   | NEK6      | chr9       | ENSG00000119408 | 3'UTR         | c.*1598C>A               |
| 1959   | NEMP1     | chr12      | ENSG00000166881 | 3'UTR         | c.*3543del               |

| Number | Gene name | Chromosome | Gene_ID         | Mutation        | Nucleotide substitution |
|--------|-----------|------------|-----------------|-----------------|-------------------------|
| 1960   | NEUROD4   | chr12      | ENSG00000123307 | 3'UTR           | c.*1076del              |
| 1961   | NF1       | chr17      | ENSG00000196712 | Intron          | c.2251+25del            |
| 1962   | NF1       | chr17      | ENSG00000196712 | Missense        | c.7602A>T               |
| 1963   | NF1       | chr17      | ENSG00000196712 | 3'UTR           | c.*589dup               |
| 1964   | NF1P5     | chr18      | ENSG00000175319 | Intron          | n.366+45del             |
| 1965   | NFAM1     | chr22      | ENSG00000235568 | Missense        | c.335T>C                |
| 1966   | NFAT5     | chr16      | ENSG00000102908 | Silent          | c.2637A>G               |
| 1967   | NFATC2    | chr20      | ENSG00000101096 | 3'UTR           | c.*2728del              |
| 1968   | NFE2L2    | chr2       | ENSG00000116044 | Silent          | c.1179T>C               |
| 1969   | NFE2L3    | chr7       | ENSG00000050344 | Frame shift del | c.458del                |
| 1970   | NFIB      | chr9       | ENSG00000147862 | 3'UTR           | c.*5756del              |
| 1971   | NFIB      | chr9       | ENSG00000147862 | 3'UTR           | c.*5749A>G              |
| 1972   | NHLH1     | chr1       | ENSG00000171786 | Missense        | c.296G>A                |
| 1973   | NHS       | chrX       | ENSG00000188158 | 3'UTR           | c.*3461del              |
| 1974   | NHSL1     | chr6       | ENSG00000135540 | Missense        | c.1714A>G               |
| 1975   | NICN1     | chr3       | ENSG00000145029 | 3'UTR           | c.*156T>A               |
| 1976   | NINL      | chr20      | ENSG00000101004 | Missense        | c.1113C>A               |
| 1977   | NIPA1     | chr15      | ENSG00000170113 | 3'UTR           | c.*2322T>C              |
| 1978   | NIPBL     | chr5       | ENSG00000164190 | Frame shift del | c.1808del               |
| 1979   | NIPBL     | chr5       | ENSG00000164190 | Frame shift del | c.1808del               |
| 1980   | NKD1      | chr16      | ENSG00000140807 | Intron          | c.26-26G>A              |
| 1981   | NKIRAS2   | chr17      | ENSG00000168256 | 3'UTR           | c.*884 *886del          |
| 1982   | NKIRAS2   | chr17      | ENSG00000168256 | 3'UTR           | c.*884 *885del          |
| 1983   | NKRF      | chrX       | ENSG00000186416 | 3'UTR           | c.*956 *957del          |
| 1984   | NKTR      | chr3       | ENSG00000114857 | 3'UTR           | c.*221del               |
| 1985   | NKX2-1    | chr14      | ENSG00000136352 | Intron          | c.78-340del             |
| 1986   | NKX2-3    | chr10      | ENSG00000119919 | Missense        | c.143C>T                |
| 1987   | NKX2-4    | chr20      | ENSG00000125816 | 3'UTR           | c.*20C>A                |
| 1988   | NKX6-1    | chr4       | ENSG00000163623 | 3'UTR           | c.*479del               |
| 1989   | NLGN2     | chr17      | ENSG00000169992 | 3'UTR           | c.*232del               |
| 1990   | NLK       | chr17      | ENSG00000087095 | 3'UTR           | c.*1538del              |
| 1991   | NLRP12    | chr19      | ENSG00000142405 | Frame shift del | c.2188del               |
| 1992   | NMRK1     | chr9       | ENSG00000106733 | Intron          | c.580+538A>G            |
| 1993   | NMT2      | chr10      | ENSG00000152465 | Intron          | c.207+2557T>C           |
| 1994   | NNT       | chr5       | ENSG00000112992 | 3'UTR           | c.*434del               |
| 1995   | NNT       | chr5       | ENSG00000112992 | 3'UTR           | c.*2073del              |
| 1996   | NOC3L     | chr10      | ENSG00000173145 | 3'UTR           | c.*584del               |
| 1997   | NOD1      | chr7       | ENSG00000106100 | Missense        | c.2459G>T               |
| 1998   | NOL11     | chr17      | ENSG00000130935 | Intron          | c.1843-78del            |
| 1999   | NOL6      | chr9       | ENSG00000165271 | 3'UTR           | c.*1085C>T              |
| 2000   | NOP9      | chr14      | ENSG00000196943 | Intron          | c.697+10A>G             |
| 2001   | NOS3      | chr7       | ENSG00000164867 | Intron          | c.3255+54A>G            |
| 2002   | NOSIP     | chr19      | ENSG00000142546 | Intron          | c.735-39del             |
| 2003   | NOTCH2    | chr1       | ENSG00000134250 | 3'UTR           | c.*415C>T               |
| 2004   | NOVA1     | chr14      | ENSG00000139910 | 3'UTR           | c.*641C>T               |
| 2005   | NPAP1     | chr15      | ENSG00000185823 | Silent          | c.1140A>G               |
| 2006   | NPAP1     | chr15      | ENSG00000185823 | 3'UTR           | c.*3416dup              |
| 2007   | NPEPPS    | chr17      | ENSG00000141279 | 3'UTR           | c.*637dup               |
| 2008   | NPPC      | chr2       | ENSG00000163273 | Intron          | c.90+19A>G              |
| 2009   | NPR3      | chr5       | ENSG00000113389 | 3'UTR           | c.*4702T>A              |
| 2010   | NPRL2     | chr3       | ENSG00000114388 | Intron          | c.78+27C>T              |
| 2011   | NR1D1     | chr17      | ENSG00000126368 | Splice site     | c.605-2A>G              |
| 2012   | NR1D2     | chr3       | ENSG00000174738 | 3'UTR           | c.*1288 *1289dup        |

| Number | Gene name | Chromosome | Gene_ID         | Mutation        | Nucleotide substitution |
|--------|-----------|------------|-----------------|-----------------|-------------------------|
| 2013   | NR1I2     | chr3       | ENSG00000144852 | Missense        | c.203T>C                |
| 2014   | NR2F2     | chr15      | ENSG00000185551 | 3'UTR           | c.*375del               |
| 2015   | NR5A1     | chr9       | ENSG00000136931 | 3'UTR           | c.*1400del              |
| 2016   | NR6A1     | chr9       | ENSG00000148200 | Intron          | c.142+40913C>A          |
| 2017   | NRAS      | chr1       | ENSG00000213281 | Missense        | c.34G>T                 |
| 2018   | NRBF2     | chr10      | ENSG00000148572 | Missense        | c.118T>C                |
| 2019   | NRBP2     | chr8       | ENSG00000185189 | Missense        | c.914T>C                |
| 2020   | NRCAM     | chr7       | ENSG00000091129 | 3'UTR           | c.*534A>C               |
| 2021   | NRF1      | chr7       | ENSG00000106459 | Splice region   | c.1405+4G>T             |
| 2022   | NRG4      | chr15      | ENSG00000169752 | Intron          | c.251+2677del           |
| 2023   | NRIP1     | chr21      | ENSG00000180530 | Nonsense        | c.451C>T                |
| 2024   | NRIP3     | chr11      | ENSG00000175352 | 3'Flank         |                         |
| 2025   | NRIP3     | chr11      | ENSG00000175352 | 3'Flank         |                         |
| 2026   | NRP1      | chr10      | ENSG00000099250 | Intron          | c.1138-11del            |
| 2027   | NRXN1     | chr2       | ENSG00000179915 | 3'UTR           | c.*2015dup              |
| 2028   | NRXN1     | chr2       | ENSG00000179915 | Intron          | c.3245-942del           |
| 2029   | NRXN1     | chr2       | ENSG00000179915 | Intron          | c.2374+67G>A            |
| 2030   | NRXN1     | chr2       | ENSG00000179915 | Intron          | c.772+48205G>A          |
| 2031   | NRXN3     | chr14      | ENSG00000021645 | 3'UTR           | c.*1564del              |
| 2032   | NSMCE2    | chr8       | ENSG00000156831 | Splice region   | c.519+3A>G              |
| 2033   | NSMCE4A   | chr10      | ENSG00000107672 | Missense        | c.899G>A                |
| 2034   | NSMF      | chr9       | ENSG00000165802 | Silent          | c.1525T>C               |
| 2035   | NSUN4     | chr1       | ENSG00000117481 | Missense        | c.731T>C                |
| 2036   | NT5C1A    | chr1       | ENSG00000116981 | Missense        | c.1030G>A               |
| 2037   | NT5C3A    | chr7       | ENSG00000122643 | 3'UTR           | c.*222 *223insTCTT      |
| 2038   | NT5DC1    | chr6       | ENSG00000178425 | Missense        | c.251T>C                |
| 2039   | NTM       | chr11      | ENSG00000182667 | 3'UTR           | c.*1256 *1257del        |
| 2040   | NTN4      | chr12      | ENSG00000074527 | Missense        | c.475T>C                |
| 2041   | NTN5      | chr19      | ENSG00000142233 | 5'Flank         |                         |
| 2042   | NTNG1     | chr1       | ENSG00000162631 | 3'UTR           | c.*2423A>G              |
| 2043   | NTRK1     | chr1       | ENSG00000198400 | 5'UTR           | c.-89G>A                |
| 2044   | NTRK1     | chr1       | ENSG00000198400 | Splice region   | c.359+4A>G              |
| 2045   | NTRK3     | chr15      | ENSG00000140538 | 3'UTR           | c.*8776A>C              |
| 2046   | NTRK3     | chr15      | ENSG00000140538 | 3'UTR           | c.*2698A>G              |
| 2047   | NTS       | chr12      | ENSG00000133636 | Intron          | c.136-13del             |
| 2048   | NUAK2     | chr1       | ENSG00000163545 | Missense        | c.1133G>A               |
| 2049   | NUBP1     | chr16      | ENSG00000103274 | Intron          | c.452-59A>T             |
| 2050   | NUCKS1    | chr1       | ENSG00000069275 | 3'UTR           | c.*2605G>T              |
| 2051   | NUDT9     | chr4       | ENSG00000170502 | 3'UTR           | c.*647C>A               |
| 2052   | NUFIP1    | chr13      | ENSG00000083635 | Intron          | c.658-9del              |
| 2053   | NUMA1     | chr11      | ENSG00000137497 | Intron          | c.-102-2486A>G          |
| 2054   | NUP107    | chr12      | ENSG00000111581 | Intron          | c.1998+19del            |
| 2055   | NUP205    | chr7       | ENSG00000155561 | Intron          | c.1474-1647C>T          |
| 2056   | NUP210L   | chr1       | ENSG00000143552 | Silent          | c.2388A>C               |
| 2057   | NUP214    | chr9       | ENSG00000126883 | 3'UTR           | c.*1111del              |
| 2058   | NUP85     | chr17      | ENSG00000125450 | Missense        | c.802T>C                |
| 2059   | NUP85     | chr17      | ENSG00000125450 | Silent          | c.870C>T                |
| 2060   | NUS1      | chr6       | ENSG00000153989 | Splice region   | c.691+12del             |
| 2061   | NUS1      | chr6       | ENSG00000153989 | 3'UTR           | c.*2903del              |
| 2062   | NUSAP1    | chr15      | ENSG00000137804 | Frame shift del | c.479del                |
| 2063   | NUSAP1    | chr15      | ENSG00000137804 | Frame shift del | c.479del                |
| 2064   | NUTM2F    | chr9       | ENSG00000130950 | Missense        | c.1223C>A               |
| 2065   | NWD1      | chr19      | ENSG00000188039 | Intron          | c.496+428A>G            |

| Number | Gene name | Chromosome | Gene_ID         | Mutation            | Nucleotide substitution |
|--------|-----------|------------|-----------------|---------------------|-------------------------|
| 2066   | NXPE2     | chr11      | ENSG00000204361 | 5'Flank             |                         |
| 2067   | NXPH3     | chr17      | ENSG00000182575 | Missense            | c.710G>T                |
| 2068   | NYAP1     | chr7       | ENSG00000166924 | Missense            | c.895G>A                |
| 2069   | OARD1     | chr6       | ENSG00000124596 | 3'UTR               | c.*1030del              |
| 2070   | OAS3      | chr12      | ENSG00000111331 | Silent              | c.189G>A                |
| 2071   | OBSCN     | chr1       | ENSG00000154358 | Silent              | c.6951C>T               |
| 2072   | OBSCN     | chr1       | ENSG00000154358 | Missense            | c.7222C>T               |
| 2073   | OBSCN     | chr1       | ENSG00000154358 | Splice region       | c.14502+12dup           |
| 2074   | OCM       | chr7       | ENSG00000122543 | Intron              | c.-3-112del             |
| 2075   | OCRL      | chrX       | ENSG00000122126 | Splice region       | c.40-3C>T               |
| 2076   | ODAPH     | chr4       | ENSG00000174792 | 3'UTR               | c.*1379del              |
| 2077   | ODF2      | chr9       | ENSG00000136811 | Intron              | c.829-20del             |
| 2078   | ODF2L     | chr1       | ENSG00000122417 | 3'UTR               | c.*2489del              |
| 2079   | OGA       | chr10      | ENSG00000198408 | 3'UTR               | c.*591del               |
| 2080   | OGDH      | chr7       | ENSG00000105953 | Silent              | c.264A>G                |
| 2081   | OLFM3     | chr1       | ENSG00000118733 | 3'UTR               | c.*1077del              |
| 2082   | OLFM3     | chr1       | ENSG00000118733 | 3'UTR               | c.*43T>C                |
| 2083   | OLR1      | chr12      | ENSG00000173391 | 5'UTR               | c.-146A>G               |
| 2084   | ONECUT1   | chr15      | ENSG00000169856 | 3'Flank             |                         |
| 2085   | OOEP      | chr6       | ENSG00000203907 | 5'UTR               | c.-131del               |
| 2086   | OPCML     | chr11      | ENSG00000183715 | 3'UTR               | c.*2975A>G              |
| 2087   | OPCML     | chr11      | ENSG00000183715 | Intron              | c.168-43 168-42dup      |
| 2088   | OPLAH     | chr8       | ENSG00000178814 | Intron              | c.3019-32T>C            |
| 2089   | OR10G3    | chr14      | ENSG00000169208 | Missense            | c.359C>T                |
| 2090   | OR13D1    | chr9       | ENSG00000179055 | translation Start S | c.1A>G                  |
| 2091   | OR4C16    | chr11      | ENSG00000279514 | Missense            | c.556 557delinsTT       |
| 2092   | OR4C16    | chr11      | ENSG00000279514 | Missense            | c.556 557delinsTT       |
| 2093   | OR51I2    | chr11      | ENSG00000187918 | Missense            | c.392G>A                |
| 2094   | OR52A1    | chr11      | ENSG00000182070 | Intron              | c.-321-9del             |
| 2095   | OR52A4P   | chr11      | ENSG00000205494 | 3'Flank             |                         |
| 2096   | OR5B17    | chr11      | ENSG00000197786 | Missense            | c.169A>G                |
| 2097   | ORC2      | chr2       | ENSG00000115942 | 3'UTR               | c.*1530 *1531del        |
| 2098   | OSBP2     | chr22      | ENSG00000184792 | 3'UTR               | c.*135del               |
| 2099   | OSBPL1A   | chr18      | ENSG00000141447 | Intron              | c.2535+30A>G            |
| 2100   | OSBPL3    | chr7       | ENSG00000070882 | 3'UTR               | c.*2447del              |
| 2101   | OSBPL6    | chr2       | ENSG00000079156 | Frame shift del     | c.2363del               |
| 2102   | OSBPL6    | chr2       | ENSG00000079156 | Frame shift del     | c.2363del               |
| 2103   | OSGIN2    | chr8       | ENSG00000164823 | Missense            | c.125T>G                |
| 2104   | OSTM1     | chr6       | ENSG00000081087 | 3'Flank             |                         |
| 2105   | OSTN      | chr3       | ENSG00000188729 | 3'UTR               | c.*2387C>T              |
| 2106   | OTOGL     | chr12      | ENSG00000165899 | Intron              | c.1977+22G>A            |
| 2107   | OTUB1     | chr11      | ENSG00000167770 | 3'UTR               | c.*99 *100insA          |
| 2108   | OTUD4     | chr4       | ENSG00000164164 | 3'UTR               | c.*3546del              |
| 2109   | OTUD7B    | chr1       | ENSG00000264522 | Silent              | c.2103G>A               |
| 2110   | OTX2      | chr14      | ENSG00000165588 | Frame shift del     | c.106del                |
| 2111   | OVOL1     | chr11      | ENSG00000172818 | 3'UTR               | c.*590T>C               |
| 2112   | OXGR1     | chr13      | ENSG00000165621 | Frame shift del     | c.764del                |
| 2113   | OXGR1     | chr13      | ENSG00000165621 | Frame shift del     | c.764del                |
| 2114   | P2RX1     | chr17      | ENSG00000108405 | Missense            | c.74G>A                 |
| 2115   | PACSIN2   | chr22      | ENSG00000100266 | Intron              | c.907-62C>T             |
| 2116   | PAK6      | chr15      | ENSG00000137843 | 5'UTR               | c.-105C>T               |
| 2117   | PAK6      | chr15      | ENSG00000137843 | Intron              | c.1356+48T>C            |
| 2118   | PAMR1     | chr11      | ENSG00000149090 | Missense            | c.1751T>G               |



| Number | Gene name | Chromosome | Gene_ID         | Mutation         | Nucleotide substitution |
|--------|-----------|------------|-----------------|------------------|-------------------------|
| 2119   | PANX2     | chr22      | ENSG00000073150 | 3'UTR            | c.*245A>G               |
| 2120   | PAOX      | chr10      | ENSG00000148832 | Intron           | c.1393-481dup           |
| 2121   | PAPOLA    | chr14      | ENSG00000090060 | 3'UTR            | c.*372dup               |
| 2122   | PAPPA     | chr9       | ENSG00000182752 | 3'UTR            | c.*1243T>C              |
| 2123   | PAPPA     | chr9       | ENSG00000182752 | 3'UTR            | c.*3652T>C              |
| 2124   | PARD6B    | chr20      | ENSG00000124171 | 3'UTR            | c.*2587 *2589del        |
| 2125   | PARG      | chr10      | ENSG00000227345 | Splice region    | c.218-5del              |
| 2126   | PARK7     | chr1       | ENSG00000116288 | Frame shift del  | c.189del                |
| 2127   | PARK7     | chr1       | ENSG00000116288 | Frame shift del  | c.189del                |
| 2128   | PARK7     | chr1       | ENSG00000116288 | Intron           | c.252+47A>G             |
| 2129   | PARM1     | chr4       | ENSG00000169116 | 3'UTR            | c.*3686G>A              |
| 2130   | PARP11    | chr12      | ENSG00000111224 | Intron           | c.19-15231G>A           |
| 2131   | PARP14    | chr3       | ENSG00000173193 | 3'UTR            | c.*345G>A               |
| 2132   | PARP2     | chr14      | ENSG00000129484 | Missense         | c.1192A>G               |
| 2133   | PARP8     | chr5       | ENSG00000151883 | 3'UTR            | c.*4224A>G              |
| 2134   | PARP9     | chr3       | ENSG00000138496 | 3'UTR            | c.*4264del              |
| 2135   | PARP9     | chr3       | ENSG00000138496 | Frame shift del  | c.1844del               |
| 2136   | PASK      | chr2       | ENSG00000115687 | Intron           | c.2720-23G>A            |
| 2137   | PATJ      | chr1       | ENSG00000132849 | 3'UTR            | c.*2571A>G              |
| 2138   | PATZ1     | chr22      | ENSG00000100105 | 3'UTR            | c.*66T>G                |
| 2139   | PAWR      | chr12      | ENSG00000177425 | 3'UTR            | c.*7126T>C              |
| 2140   | PAWR      | chr12      | ENSG00000177425 | 3'UTR            | c.*641A>G               |
| 2141   | PAX6      | chr11      | ENSG00000007372 | 5'UTR            | c.-571dup               |
| 2142   | PAX7      | chr1       | ENSG00000009709 | Silent           | c.306C>T                |
| 2143   | PAXBP1    | chr21      | ENSG00000159086 | Intron           | c.2191-34T>C            |
| 2144   | PBXIP1    | chr1       | ENSG00000163346 | 3'UTR            | c.*497T>C               |
| 2145   | PCBP2     | chr12      | ENSG00000197111 | Intron           | c.790-66del             |
| 2146   | PCBP2     | chr12      | ENSG00000197111 | Nonstop Mutation | c.994T>C                |
| 2147   | PCDH15    | chr10      | ENSG00000150275 | Intron           | c.4367+37G>A            |
| 2148   | PCDHA5    | chr5       | ENSG00000204965 | Missense         | c.296C>T                |
| 2149   | PCDHA7    | chr5       | ENSG00000204963 | Missense         | c.547C>T                |
| 2150   | PCDHB1    | chr5       | ENSG00000171815 | Missense         | c.1315G>A               |
| 2151   | PCDHB13   | chr5       | ENSG00000187372 | 3'UTR            | c.*25A>G                |
| 2152   | PCDHB6    | chr5       | ENSG00000113211 | 3'Flank          |                         |
| 2153   | PCDHGA2   | chr5       | ENSG00000081853 | Missense         | c.992C>T                |
| 2154   | PCGF3     | chr4       | ENSG00000185619 | 3'UTR            | c.*1246del              |
| 2155   | PCGF6     | chr10      | ENSG00000156374 | Intron           | c.585+18del             |
| 2156   | PCLO      | chr7       | ENSG00000186472 | Splice region    | c.14047-4A>G            |
| 2157   | PCMT1     | chr6       | ENSG00000120265 | Intron           | c.*37+199 *37+200del    |
| 2158   | PCMTD1    | chr8       | ENSG00000168300 | 3'UTR            | c.*66dup                |
| 2159   | PCNX1     | chr14      | ENSG00000100731 | Intron           | c.3151-73A>G            |
| 2160   | PCSK5     | chr9       | ENSG00000099139 | 3'UTR            | c.*195G>C               |
| 2161   | PCSK7     | chr11      | ENSG00000160613 | 3'UTR            | c.*726A>G               |
| 2162   | PDCD11    | chr10      | ENSG00000148843 | Silent           | c.804T>A                |
| 2163   | PDCD1LG2  | chr9       | ENSG00000197646 | Intron           | c.55+22G>T              |
| 2164   | PDE10A    | chr6       | ENSG00000112541 | 3'UTR            | c.*1967del              |
| 2165   | PDE4B     | chr1       | ENSG00000184588 | Splice region    | c.281+8G>C              |
| 2166   | PDGFA     | chr7       | ENSG00000197461 | 3'UTR            | c.*1291 *1292del        |
| 2167   | PDGFA     | chr7       | ENSG00000197461 | Intron           | c.*13+28T>C             |
| 2168   | PDGFD     | chr11      | ENSG00000170962 | 5'UTR            | c.-396C>T               |
| 2169   | PDHX      | chr11      | ENSG00000110435 | Intron           | c.115+107A>G            |
| 2170   | PDLIM5    | chr4       | ENSG00000163110 | Intron           | c.920+75A>G             |
| 2171   | PDP2      | chr16      | ENSG00000172840 | 3'UTR            | c.*295A>G               |

| Number | Gene name | Chromosome | Gene_ID         | Mutation        | Nucleotide substitution |
|--------|-----------|------------|-----------------|-----------------|-------------------------|
| 2172   | PDPK1     | chr16      | ENSG00000140992 | 3'UTR           | c.*5332del              |
| 2173   | PDPN      | chr1       | ENSG00000162493 | Intron          | c.560-20T>A             |
| 2174   | PDPN      | chr1       | ENSG00000162493 | 3'UTR           | c.*64G>A                |
| 2175   | PDS5A     | chr4       | ENSG00000121892 | Missense        | c.307C>T                |
| 2176   | PDSS2     | chr6       | ENSG00000164494 | 3'UTR           | c.*2032del              |
| 2177   | PDXK      | chr21      | ENSG00000160209 | 3'UTR           | c.*1318T>C              |
| 2178   | PDXK      | chr21      | ENSG00000160209 | 3'UTR           | c.*1329A>G              |
| 2179   | PDZRN3    | chr3       | ENSG00000121440 | 5'Flank         |                         |
| 2180   | PEAK1     | chr15      | ENSG00000173517 | Missense        | c.733A>G                |
| 2181   | PEAR1     | chr1       | ENSG00000187800 | Missense        | c.1531T>C               |
| 2182   | PELI2     | chr14      | ENSG00000139946 | 3'UTR           | c.*309del               |
| 2183   | PELI3     | chr11      | ENSG00000174516 | 3'UTR           | c.*5C>A                 |
| 2184   | PER2      | chr2       | ENSG00000132326 | Missense        | c.296G>A                |
| 2185   | PEX10     | chr1       | ENSG00000157911 | 3'UTR           | c.*894A>G               |
| 2186   | PEX5      | chr12      | ENSG00000139197 | Missense        | c.1142T>C               |
| 2187   | PEX5L     | chr3       | ENSG00000114757 | 3'UTR           | c.*5952del              |
| 2188   | PEX5L     | chr3       | ENSG00000114757 | 3'UTR           | c.*5313del              |
| 2189   | PFKFB2    | chr1       | ENSG00000123836 | 3'UTR           | c.*1783C>T              |
| 2190   | PFKP      | chr10      | ENSG00000067057 | Intron          | c.1660-717C>T           |
| 2191   | PGAP1     | chr2       | ENSG00000197121 | Intron          | c.1768-13A>G            |
| 2192   | PGAP1     | chr2       | ENSG00000197121 | Missense        | c.472T>C                |
| 2193   | PGBD4     | chr15      | ENSG00000182405 | Missense        | c.1385T>C               |
| 2194   | PGM2      | chr4       | ENSG00000169299 | Silent          | c.345T>C                |
| 2195   | PGM3      | chr6       | ENSG00000013375 | Missense        | c.701A>G                |
| 2196   | PGM5      | chr9       | ENSG00000154330 | 3'UTR           | c.*107T>G               |
| 2197   | PHACTR1   | chr6       | ENSG00000112137 | 3'UTR           | c.*73A>G                |
| 2198   | PHACTR1   | chr6       | ENSG00000112137 | 3'UTR           | c.*1442C>T              |
| 2199   | PHACTR3   | chr20      | ENSG00000087495 | 3'UTR           | c.*324G>A               |
| 2200   | PHB       | chr17      | ENSG00000167085 | Missense        | c.470G>A                |
| 2201   | PHETA1    | chr12      | ENSG00000198324 | 3'UTR           | c.*2022del              |
| 2202   | PHF13     | chr1       | ENSG00000116273 | 3'UTR           | c.*462G>A               |
| 2203   | PHF20L1   | chr8       | ENSG00000129292 | Intron          | c.769+33dup             |
| 2204   | PHF24     | chr9       | ENSG00000122733 | Silent          | c.480C>A                |
| 2205   | PHF6      | chrX       | ENSG00000156531 | 3'UTR           | c.*1507del              |
| 2206   | PHF6      | chrX       | ENSG00000156531 | 3'UTR           | c.*2170del              |
| 2207   | PHF7      | chr3       | ENSG00000010318 | Intron          | c.42-85T>C              |
| 2208   | PHF7      | chr3       | ENSG00000010318 | Missense        | c.1084A>G               |
| 2209   | PHLDB1    | chr11      | ENSG00000019144 | Intron          | c.3631-64T>C            |
| 2210   | PHLDB2    | chr3       | ENSG00000144824 | Intron          | c.2824+61del            |
| 2211   | PHLDB3    | chr19      | ENSG00000176531 | Intron          | c.1703-50C>G            |
| 2212   | PIEZO1    | chr16      | ENSG00000103335 | Intron          | c.5949+51C>T            |
| 2213   | PIEZO1    | chr16      | ENSG00000103335 | Intron          | c.4496-12G>A            |
| 2214   | PIGT      | chr20      | ENSG00000124155 | Missense        | c.1060T>C               |
| 2215   | PIK3C2B   | chr1       | ENSG00000133056 | Missense        | c.1439G>A               |
| 2216   | PIK3C3    | chr18      | ENSG00000078142 | 3'UTR           | c.*3093A>G              |
| 2217   | PIK3CA    | chr3       | ENSG00000121879 | 3'UTR           | c.*693del               |
| 2218   | PIK3R1    | chr5       | ENSG00000145675 | Intron          | c.119+74A>G             |
| 2219   | PIK3R3    | chr1       | ENSG00000117461 | Frame shift del | c.883del                |
| 2220   | PIKFYVE   | chr2       | ENSG00000115020 | Silent          | c.1749A>G               |
| 2221   | PIM2      | chrX       | ENSG00000102096 | 3'UTR           | c.*575 *576del          |
| 2222   | PIP4P2    | chr8       | ENSG00000155099 | 3'UTR           | c.*1277del              |
| 2223   | PIP5K1C   | chr19      | ENSG00000186111 | Frame shift del | c.2066del               |
| 2224   | PIP5K1C   | chr19      | ENSG00000186111 | Frame shift del | c.2066del               |

| Number | Gene name | Chromosome | Gene_ID         | Mutation        | Nucleotide substitution |
|--------|-----------|------------|-----------------|-----------------|-------------------------|
| 2225   | PIP5K1C   | chr19      | ENSG00000186111 | Missense        | c.1481C>G               |
| 2226   | PIPSL     | chr10      | ENSG00000180764 | RNA             | n.891C>T                |
| 2227   | PITPNB    | chr22      | ENSG00000180957 | 3'UTR           | c.*1187dup              |
| 2228   | PITPNM2   | chr12      | ENSG00000090975 | Intron          | c.3709-19G>A            |
| 2229   | PITPNM2   | chr12      | ENSG00000090975 | Missense        | c.3244A>G               |
| 2230   | PITPNM2   | chr12      | ENSG00000090975 | Missense        | c.1948C>T               |
| 2231   | PITPNM3   | chr17      | ENSG00000091622 | 3'UTR           | c.*3932G>A              |
| 2232   | PITX3     | chr10      | ENSG00000107859 | 3'Flank         |                         |
| 2233   | PJA2      | chr5       | ENSG00000198961 | Missense        | c.478A>G                |
| 2234   | PKD1L2    | chr16      | ENSG00000166473 | 5'Flank         |                         |
| 2235   | PKD2      | chr4       | ENSG00000118762 | 3'UTR           | c.*1355del              |
| 2236   | PKIA      | chr8       | ENSG00000171033 | 3'UTR           | c.*602C>A               |
| 2237   | PKIA      | chr8       | ENSG00000171033 | 3'UTR           | c.*1408A>G              |
| 2238   | PKN1      | chr19      | ENSG00000123143 | Missense        | c.983T>C                |
| 2239   | PKNOX1    | chr21      | ENSG00000160199 | Frame shift Ins | c.879dup                |
| 2240   | PKP2      | chr12      | ENSG00000057294 | 3'UTR           | c.*1311del              |
| 2241   | PKP3      | chr11      | ENSG00000184363 | Intron          | c.1567-27G>A            |
| 2242   | PKP4      | chr2       | ENSG00000144283 | Missense        | c.1561A>G               |
| 2243   | PLA2G2C   | chr1       | ENSG00000187980 | 3'UTR           | c.*2733del              |
| 2244   | PLA2G2C   | chr1       | ENSG00000187980 | 3'UTR           | c.*632G>T               |
| 2245   | PLA2G2F   | chr1       | ENSG00000158786 | 5'UTR           | c.-95G>A                |
| 2246   | PLA2G4C   | chr19      | ENSG00000105499 | Missense        | c.293T>C                |
| 2247   | PLA2G6    | chr22      | ENSG00000184381 | Silent          | c.75G>A                 |
| 2248   | PLA2R1    | chr2       | ENSG00000153246 | 3'UTR           | c.*1795C>G              |
| 2249   | PLAA      | chr9       | ENSG00000137055 | 3'UTR           | c.*355T>C               |
| 2250   | PLAA      | chr9       | ENSG00000137055 | Intron          | c.1418-24C>A            |
| 2251   | PLCB3     | chr11      | ENSG00000149782 | Missense        | c.929T>C                |
| 2252   | PLCH1     | chr3       | ENSG00000114805 | Missense        | c.3167C>A               |
| 2253   | PLCXD3    | chr5       | ENSG00000182836 | 3'UTR           | c.*5922del              |
| 2254   | PLEKHG3   | chr14      | ENSG00000126822 | Missense        | c.2098T>C               |
| 2255   | PLEKHG4B  | chr5       | ENSG00000153404 | Silent          | c.1881C>T               |
| 2256   | PLOD3     | chr7       | ENSG00000106397 | Missense        | c.541C>T                |
| 2257   | PLPP3     | chr1       | ENSG00000162407 | Missense        | c.320G>A                |
| 2258   | PLPP6     | chr9       | ENSG00000205808 | 3'UTR           | c.*1565 *1566delinsGC   |
| 2259   | PLS1      | chr3       | ENSG00000120756 | Intron          | c.1629+23del            |
| 2260   | PLS1      | chr3       | ENSG00000120756 | 3'UTR           | c.*602del               |
| 2261   | PLSCR1    | chr3       | ENSG00000188313 | Splice region   | c.356-3dup              |
| 2262   | PLSCR2    | chr3       | ENSG00000163746 | Splice region   | c.-83-3del              |
| 2263   | PLSCR4    | chr3       | ENSG00000114698 | 3'UTR           | c.*1597del              |
| 2264   | PLSCR4    | chr3       | ENSG00000114698 | 3'UTR           | c.*1270del              |
| 2265   | PLXDC1    | chr17      | ENSG00000161381 | Intron          | c.990-444C>T            |
| 2266   | PLXNA1    | chr3       | ENSG00000114554 | Intron          | c.4363-267T>C           |
| 2267   | PLXNA4    | chr7       | ENSG00000221866 | 3'UTR           | c.*2088G>A              |
| 2268   | PLXNB1    | chr3       | ENSG00000164050 | Frame shift del | c.2653del               |
| 2269   | PLXNB1    | chr3       | ENSG00000164050 | Frame shift del | c.2653del               |
| 2270   | PLXNB2    | chr22      | ENSG00000196576 | Intron          | c.4647+34G>A            |
| 2271   | PLXNB2    | chr22      | ENSG00000196576 | Missense        | c.3922C>T               |
| 2272   | PLXNB2    | chr22      | ENSG00000196576 | Splice region   | c.1252-8G>A             |
| 2273   | PLXNC1    | chr12      | ENSG00000136040 | Missense        | c.4249C>T               |
| 2274   | PM20D2    | chr6       | ENSG00000146281 | 3'UTR           | c.*1013G>A              |
| 2275   | PMEP A1   | chr20      | ENSG00000124225 | 3'UTR           | c.*736del               |
| 2276   | PMF1      | chr1       | ENSG00000160783 | Missense        | c.425A>G                |
| 2277   | PNISR     | chr6       | ENSG00000132424 | Intron          | c.1102+72del            |

| Number | Gene name | Chromosome | Gene_ID         | Mutation        | Nucleotide substitution |
|--------|-----------|------------|-----------------|-----------------|-------------------------|
| 2278   | PNMA1     | chr14      | ENSG00000176903 | 3'UTR           | c.*782T>C               |
| 2279   | PNMA1     | chr14      | ENSG00000176903 | 3'UTR           | c.*600del               |
| 2280   | PNPLA6    | chr19      | ENSG00000032444 | Silent          | c.1557G>A               |
| 2281   | PNPLA8    | chr7       | ENSG00000135241 | Silent          | c.192A>G                |
| 2282   | PNPT1     | chr2       | ENSG00000138035 | Intron          | c.1177-88del            |
| 2283   | PNPT1     | chr2       | ENSG00000138035 | Missense        | c.76C>T                 |
| 2284   | PNRC2     | chr1       | ENSG00000189266 | 3'UTR           | c.*526T>C               |
| 2285   | PNRC2P1   | chr1       | ENSG00000228217 | 3'Flank         |                         |
| 2286   | POFUT1    | chr20      | ENSG00000101346 | 3'UTR           | c.*1295del              |
| 2287   | POFUT1    | chr20      | ENSG00000101346 | 3'UTR           | c.*3870del              |
| 2288   | POGZ      | chr1       | ENSG00000143442 | Missense        | c.2915A>C               |
| 2289   | POLA2     | chr11      | ENSG00000014138 | 3'UTR           | c.*720A>C               |
| 2290   | POLA2     | chr11      | ENSG00000014138 | 3'UTR           | c.*20A>G                |
| 2291   | POLD2     | chr7       | ENSG00000106628 | Missense        | c.763A>G                |
| 2292   | POLE      | chr12      | ENSG00000177084 | Splice region   | c.4005G>A               |
| 2293   | POLE      | chr12      | ENSG00000177084 | Missense        | c.1616A>G               |
| 2294   | POLL      | chr10      | ENSG00000166169 | Silent          | c.1269G>A               |
| 2295   | POLQ      | chr3       | ENSG00000051341 | Missense        | c.4425T>G               |
| 2296   | POLR2A    | chr17      | ENSG00000181222 | Missense        | c.2899A>G               |
| 2297   | POLR2E    | chr19      | ENSG00000099817 | Intron          | c.260-40dup             |
| 2298   | POLR2M    | chr15      | ENSG00000255529 | 3'UTR           | c.*915del               |
| 2299   | POLR3A    | chr10      | ENSG00000148606 | Silent          | c.2397G>A               |
| 2300   | POLR3F    | chr20      | ENSG00000132664 | Intron          | c.180+58del             |
| 2301   | POLR3G    | chr5       | ENSG00000113356 | Intron          | c.438+39dup             |
| 2302   | POMT2     | chr14      | ENSG00000009830 | Intron          | c.1576+74C>T            |
| 2303   | POU2F1    | chr1       | ENSG00000143190 | Intron          | c.781-2321T>A           |
| 2304   | POU2F2    | chr19      | ENSG00000028277 | 3'UTR           | c.*11T>C                |
| 2305   | POU5F2    | chr5       | ENSG00000248483 | Missense        | c.497G>A                |
| 2306   | POU6F2    | chr7       | ENSG00000106536 | 3'UTR           | c.*725del               |
| 2307   | PPA2      | chr4       | ENSG00000138777 | Intron          | c.784-21del             |
| 2308   | PPARA     | chr22      | ENSG00000186951 | 3'UTR           | c.*889del               |
| 2309   | PPARA     | chr22      | ENSG00000186951 | 3'UTR           | c.*1496A>G              |
| 2310   | PPARGC1B  | chr5       | ENSG00000155846 | Intron          | c.1742+35T>G            |
| 2311   | PPARGC1B  | chr5       | ENSG00000155846 | Missense        | c.2324T>C               |
| 2312   | PPARGC1B  | chr5       | ENSG00000155846 | 3'UTR           | c.*6844 *6849del        |
| 2313   | PPFIA1    | chr11      | ENSG00000131626 | Missense        | c.1372T>C               |
| 2314   | PPFIA3    | chr19      | ENSG00000177380 | Missense        | c.1667A>T               |
| 2315   | PPFIBP1   | chr12      | ENSG00000110841 | 3'UTR           | c.*1963A>G              |
| 2316   | PPIA      | chr7       | ENSG00000196262 | 3'UTR           | c.*754T>C               |
| 2317   | PPID      | chr4       | ENSG00000171497 | Intron          | c.646-39A>G             |
| 2318   | PPIH      | chr1       | ENSG00000171960 | Missense        | c.418G>C                |
| 2319   | PPIL2     | chr22      | ENSG00000100023 | Intron          | c.715-81T>C             |
| 2320   | PPIL6     | chr6       | ENSG00000185250 | Intron          | c.560-4890del           |
| 2321   | PPM1A     | chr14      | ENSG00000100614 | 3'UTR           | c.*5632del              |
| 2322   | PPM1A     | chr14      | ENSG00000100614 | 3'UTR           | c.*5764T>C              |
| 2323   | PPM1B     | chr2       | ENSG00000138032 | 3'UTR           | c.*456C>T               |
| 2324   | PPM1D     | chr17      | ENSG00000170836 | Frame shift del | c.1535del               |
| 2325   | PPM1D     | chr17      | ENSG00000170836 | Frame shift del | c.1535del               |
| 2326   | PPM1L     | chr3       | ENSG00000163590 | 5'UTR           | c.-546T>G               |
| 2327   | PPM1M     | chr3       | ENSG00000164088 | Missense        | c.94C>G                 |
| 2328   | PPP1R13B  | chr14      | ENSG00000088808 | 3'UTR           | c.*1154del              |
| 2329   | PPP1R15B  | chr1       | ENSG00000158615 | 3'UTR           | c.*183C>A               |
| 2330   | PPP1R16B  | chr20      | ENSG00000101445 | 3'Flank         |                         |

| Number | Gene name | Chromosome | Gene_ID         | Mutation        | Nucleotide substitution |
|--------|-----------|------------|-----------------|-----------------|-------------------------|
| 2331   | PPP1R27   | chr17      | ENSG00000182676 | Missense        | c.47G>A                 |
| 2332   | PPP2R1B   | chr11      | ENSG00000137713 | 3'UTR           | c.*3080C>G              |
| 2333   | PPP2R3A   | chr3       | ENSG00000073711 | 3'UTR           | c.*1829del              |
| 2334   | PPP2R5C   | chr14      | ENSG00000078304 | 5'UTR           | c.-131C>G               |
| 2335   | PPP2R5C   | chr14      | ENSG00000078304 | Intron          | c.260-20522del          |
| 2336   | PPP4R1    | chr18      | ENSG00000154845 | Missense        | c.632A>G                |
| 2337   | PPP4R3A   | chr14      | ENSG00000100796 | 3'UTR           | c.*573 *574del          |
| 2338   | PPP4R3B   | chr2       | ENSG00000275052 | Frame shift del | c.2004del               |
| 2339   | PPP6C     | chr9       | ENSG00000119414 | Intron          | c.171+42T>C             |
| 2340   | PPP6R1    | chr19      | ENSG00000105063 | Missense        | c.1142A>T               |
| 2341   | PRAC2     | chr17      | ENSG00000229637 | Frame shift Ins | c.101dup                |
| 2342   | PRAC2     | chr17      | ENSG00000229637 | Frame shift del | c.102del                |
| 2343   | PRDM15    | chr21      | ENSG00000141956 | 3'UTR           | c.*734 *735del          |
| 2344   | PRDM16    | chr1       | ENSG00000142611 | Missense        | c.49G>A                 |
| 2345   | PRDM16    | chr1       | ENSG00000142611 | 3'UTR           | c.*1625C>A              |
| 2346   | PRDM4     | chr12      | ENSG00000110851 | Splice region   | c.1610-6del             |
| 2347   | PRDM6     | chr5       | ENSG00000061455 | Missense        | c.838G>A                |
| 2348   | PRDX2     | chr19      | ENSG00000167815 | Missense        | c.81G>T                 |
| 2349   | PRDX3     | chr10      | ENSG00000165672 | Missense        | c.238G>A                |
| 2350   | PRDX6     | chr1       | ENSG00000117592 | 3'UTR           | c.*804G>A               |
| 2351   | PRKACB    | chr1       | ENSG00000142875 | 3'UTR           | c.*2867A>G              |
| 2352   | PRKCB     | chr16      | ENSG00000166501 | Silent          | c.498C>A                |
| 2353   | PRKCB     | chr16      | ENSG00000166501 | 3'UTR           | c.*1185del              |
| 2354   | PRKCZ     | chr1       | ENSG00000067606 | Intron          | c.334+14374G>A          |
| 2355   | PRKCZ     | chr1       | ENSG00000067606 | Missense        | c.886T>G                |
| 2356   | PRKD3     | chr2       | ENSG00000115825 | 3'UTR           | c.*1296del              |
| 2357   | PRKDC     | chr8       | ENSG00000253729 | Intron          | c.12182+27T>C           |
| 2358   | PRKDC     | chr8       | ENSG00000253729 | Missense        | c.10238A>G              |
| 2359   | PRKG1     | chr10      | ENSG00000185532 | Intron          | c.478+146279C>A         |
| 2360   | PRL       | chr6       | ENSG00000172179 | Intron          | c.493-11del             |
| 2361   | PRLHR     | chr10      | ENSG00000119973 | Missense        | c.946G>A                |
| 2362   | PRLR      | chr5       | ENSG00000113494 | 3'UTR           | c.*9097A>G              |
| 2363   | PRMT6     | chr1       | ENSG00000198890 | Missense        | c.425C>G                |
| 2364   | PRMT7     | chr16      | ENSG00000132600 | Missense        | c.1087C>T               |
| 2365   | PRMT9     | chr4       | ENSG00000164169 | Missense        | c.923T>C                |
| 2366   | PROC      | chr2       | ENSG00000115718 | 5'UTR           | c.-10T>C                |
| 2367   | PROCR     | chr20      | ENSG00000101000 | Missense        | c.131A>G                |
| 2368   | PROM1     | chr4       | ENSG0000007062  | Frame shift del | c.1850del               |
| 2369   | PROM1     | chr4       | ENSG0000007062  | Frame shift del | c.1850del               |
| 2370   | PRORP     | chr14      | ENSG00000100890 | 3'Flank         |                         |
| 2371   | PROS1     | chr3       | ENSG00000184500 | Intron          | c.602-23del             |
| 2372   | PROSER3   | chr19      | ENSG00000167595 | Missense        | c.497C>T                |
| 2373   | PRPF19    | chr11      | ENSG00000110107 | Missense        | c.1507A>G               |
| 2374   | PRPF39    | chr14      | ENSG00000185246 | Intron          | c.570-705del            |
| 2375   | PRPF40A   | chr2       | ENSG00000196504 | 5'UTR           | c.-1del                 |
| 2376   | PRR14L    | chr22      | ENSG00000183530 | 3'UTR           | c.*1573A>G              |
| 2377   | PRR19     | chr19      | ENSG00000188368 | Silent          | c.15A>G                 |
| 2378   | PRR22     | chr19      | ENSG00000212123 | Silent          | c.891A>G                |
| 2379   | PRR27     | chr4       | ENSG00000187533 | Intron          | n.166+83del             |
| 2380   | PRRC2B    | chr9       | ENSG00000130723 | Splice region   | c.4614T>C               |
| 2381   | PRRC2B    | chr9       | ENSG00000130723 | Intron          | c.5373+36del            |
| 2382   | PRRC2B    | chr9       | ENSG00000130723 | 3'UTR           | c.*242T>A               |
| 2383   | PRRC2C    | chr1       | ENSG00000117523 | Missense        | c.485A>G                |

| Number | Gene name | Chromosome | Gene_ID         | Mutation        | Nucleotide substitution |
|--------|-----------|------------|-----------------|-----------------|-------------------------|
| 2384   | PRRC2C    | chr1       | ENSG00000117523 | Frame shift del | c.2906del               |
| 2385   | PRRC2C    | chr1       | ENSG00000117523 | Frame shift del | c.2906del               |
| 2386   | PRRC2C    | chr1       | ENSG00000117523 | 3'UTR           | c.*872del               |
| 2387   | PRRT3     | chr3       | ENSG00000163704 | 3'UTR           | c.*512del               |
| 2388   | PRRT4     | chr7       | ENSG00000224940 | Silent          | c.1584G>A               |
| 2389   | PRRT4     | chr7       | ENSG00000224940 | Missense        | c.386C>T                |
| 2390   | PRUNE2    | chr9       | ENSG00000106772 | 3'UTR           | c.*766dup               |
| 2391   | PRUNE2    | chr9       | ENSG00000106772 | 3'UTR           | c.*763T>C               |
| 2392   | PRXL2A    | chr10      | ENSG00000122378 | 3'UTR           | c.*551_*557del          |
| 2393   | PSAP      | chr10      | ENSG00000197746 | 5'UTR           | c.-76T>C                |
| 2394   | PSD       | chr10      | ENSG00000059915 | Missense        | c.593G>C                |
| 2395   | PSD3      | chr8       | ENSG00000156011 | 3'UTR           | c.*6903A>G              |
| 2396   | PSEN1     | chr14      | ENSG00000080815 | Intron          | c.869-87G>A             |
| 2397   | PSMA1     | chr11      | ENSG00000129084 | Silent          | c.792A>G                |
| 2398   | PSMA1     | chr11      | ENSG00000129084 | 5'UTR           | c.-101A>G               |
| 2399   | PSMA6     | chr14      | ENSG00000100902 | Intron          | c.172-62del             |
| 2400   | PSMD2     | chr3       | ENSG00000175166 | Intron          | c.2298+13A>G            |
| 2401   | PSMD4     | chr1       | ENSG00000159352 | Intron          | c.283-69C>T             |
| 2402   | PSMD4     | chr1       | ENSG00000159352 | Intron          | c.438+65T>C             |
| 2403   | PSMD5     | chr9       | ENSG00000095261 | 3'UTR           | c.*763A>G               |
| 2404   | PSMD7     | chr16      | ENSG00000103035 | 3'Flank         |                         |
| 2405   | PTCD2     | chr5       | ENSG00000049883 | Missense        | c.391A>G                |
| 2406   | PTCD2     | chr5       | ENSG00000049883 | 3'UTR           | c.*700A>G               |
| 2407   | PTCD3     | chr2       | ENSG00000132300 | Missense        | c.1363A>G               |
| 2408   | PTCD3     | chr2       | ENSG00000132300 | 3'UTR           | c.*4024_*4037del        |
| 2409   | PTCD3     | chr2       | ENSG00000132300 | 3'UTR           | c.*4290C>T              |
| 2410   | PTCH2     | chr1       | ENSG00000117425 | Frame shift Ins | c.198dup                |
| 2411   | PTENP1    | chr9       | ENSG00000237984 | RNA             | n.2070del               |
| 2412   | PTGER3    | chr1       | ENSG00000050628 | Missense        | c.601G>A                |
| 2413   | PTPN13    | chr4       | ENSG00000163629 | 3'UTR           | c.*574A>G               |
| 2414   | PTPN22    | chr1       | ENSG00000134242 | Splice site     | c.828+2T>C              |
| 2415   | PTPN3     | chr9       | ENSG00000070159 | Missense        | c.2509C>T               |
| 2416   | PTPN4     | chr2       | ENSG00000088179 | 3'UTR           | c.*2958C>G              |
| 2417   | PTPRG     | chr3       | ENSG00000144724 | Missense        | c.4174A>G               |
| 2418   | PTPRJ     | chr11      | ENSG00000149177 | Missense        | c.1420T>C               |
| 2419   | PTPRJ     | chr11      | ENSG00000149177 | Silent          | c.3576T>C               |
| 2420   | PTPRM     | chr18      | ENSG00000173482 | Splice site     | c.1753+2T>C             |
| 2421   | PTPRM     | chr18      | ENSG00000173482 | Splice region   | c.3018C>A               |
| 2422   | PTPRN2    | chr7       | ENSG00000155093 | Intron          | c.2257+2676A>G          |
| 2423   | PTPRU     | chr1       | ENSG00000060656 | 5'Flank         |                         |
| 2424   | PUF60     | chr8       | ENSG00000179950 | 5'Flank         |                         |
| 2425   | PUS10     | chr2       | ENSG00000162927 | 3'UTR           | c.*23T>C                |
| 2426   | PWWP2A    | chr5       | ENSG00000170234 | Missense        | c.1750A>T               |
| 2427   | PXDC1     | chr6       | ENSG00000168994 | 3'UTR           | c.*537del               |
| 2428   | PXDN      | chr2       | ENSG00000130508 | 3'UTR           | c.*1732T>C              |
| 2429   | PXDN      | chr2       | ENSG00000130508 | Missense        | c.2483A>G               |
| 2430   | PXK       | chr3       | ENSG00000168297 | Missense        | c.1492T>C               |
| 2431   | PYGO1     | chr15      | ENSG00000171016 | 3'UTR           | c.*3062_*3063delinsTG   |
| 2432   | QRICH2    | chr17      | ENSG00000129646 | Frame shift del | c.4214del               |
| 2433   | QRICH2    | chr17      | ENSG00000129646 | Frame shift del | c.4214del               |
| 2434   | QSER1     | chr11      | ENSG00000060749 | 3'UTR           | c.*361del               |
| 2435   | RAB14     | chr9       | ENSG00000119396 | 3'UTR           | c.*238del               |
| 2436   | RAB17     | chr2       | ENSG00000124839 | Frame shift del | c.25del                 |

| Number | Gene name | Chromosome | Gene_ID         | Mutation        | Nucleotide substitution |
|--------|-----------|------------|-----------------|-----------------|-------------------------|
| 2437   | RAB17     | chr2       | ENSG00000124839 | Frame shift del | c.25del                 |
| 2438   | RAB22A    | chr20      | ENSG00000124209 | 3'UTR           | c.*2535dup              |
| 2439   | RAB27A    | chr15      | ENSG00000069974 | 3'UTR           | c.*773T>C               |
| 2440   | RAB36     | chr22      | ENSG00000100228 | 3'UTR           | c.*2052del              |
| 2441   | RAB37     | chr17      | ENSG00000172794 | 3'UTR           | c.*1066del              |
| 2442   | RAB38     | chr11      | ENSG00000123892 | Missense        | c.182T>C                |
| 2443   | RAB39B    | chrX       | ENSG00000155961 | 3'UTR           | c.*1621del              |
| 2444   | RAB3B     | chr1       | ENSG00000169213 | 3'UTR           | c.*2581T>A              |
| 2445   | RAB3GAP2  | chr1       | ENSG00000118873 | Missense        | c.3389C>T               |
| 2446   | RAB3GAP2  | chr1       | ENSG00000118873 | Silent          | c.3045T>C               |
| 2447   | RAB3GAP2  | chr1       | ENSG00000118873 | Intron          | c.2980+30T>C            |
| 2448   | RAB3GAP2  | chr1       | ENSG00000118873 | Missense        | c.1408C>A               |
| 2449   | RAB42     | chr1       | ENSG00000188060 | 3'UTR           | c.*732G>A               |
| 2450   | RAB43     | chr3       | ENSG00000172780 | 3'UTR           | c.*3493T>C              |
| 2451   | RAB7A     | chr3       | ENSG00000075785 | Intron          | c.-8-157A>G             |
| 2452   | RABGEF1   | chr7       | ENSG00000154710 | 3'UTR           | c.*2041G>A              |
| 2453   | RABL2A    | chr2       | ENSG00000144134 | 3'UTR           | c.*119T>C               |
| 2454   | RABL6     | chr9       | ENSG00000196642 | Frame shift del | c.1836del               |
| 2455   | RABL6     | chr9       | ENSG00000196642 | Frame shift del | c.1836del               |
| 2456   | RAC2      | chr22      | ENSG00000128340 | Intron          | c.36-26G>A              |
| 2457   | RAD50     | chr5       | ENSG00000113522 | 3'UTR           | c.*1370del              |
| 2458   | RAD51AP1  | chr12      | ENSG00000111247 | Intron          | c.210-641del            |
| 2459   | RAD51D    | chr17      | ENSG00000185379 | Intron          | c.144+5444C>T           |
| 2460   | RALGPS2   | chr1       | ENSG00000116191 | 3'UTR           | c.*753del               |
| 2461   | RALYL     | chr8       | ENSG00000184672 | Intron          | c.404+27T>C             |
| 2462   | RAN       | chr12      | ENSG00000132341 | 3'UTR           | c.*1003del              |
| 2463   | RAP2B     | chr3       | ENSG00000181467 | 3'UTR           | c.*2457del              |
| 2464   | RAPGEF2   | chr4       | ENSG00000109756 | 3'UTR           | c.*1017 *1018delinsGT   |
| 2465   | RAPGEF3   | chr12      | ENSG00000079337 | 3'UTR           | c.*2578T>C              |
| 2466   | RAPGEF5   | chr7       | ENSG00000136237 | 3'UTR           | c.*1363del              |
| 2467   | RASAL2    | chr1       | ENSG00000075391 | Frame shift del | c.1166del               |
| 2468   | RASGRP2   | chr11      | ENSG00000068831 | Missense        | c.1303T>C               |
| 2469   | RASSF2    | chr20      | ENSG00000101265 | 3'UTR           | c.*2701G>A              |
| 2470   | RASSF6    | chr4       | ENSG00000169435 | 3'UTR           | c.*1980T>C              |
| 2471   | RB1       | chr13      | ENSG00000139687 | Frame shift del | c.1959del               |
| 2472   | RB1       | chr13      | ENSG00000139687 | Frame shift del | c.1959del               |
| 2473   | RBBP6     | chr16      | ENSG00000122257 | Frame shift del | c.4423del               |
| 2474   | RBBP6     | chr16      | ENSG00000122257 | Frame shift del | c.4423del               |
| 2475   | RBBP9     | chr20      | ENSG00000089050 | Intron          | c.335-9del              |
| 2476   | RBBP9     | chr20      | ENSG00000089050 | Intron          | c.142+48A>G             |
| 2477   | RBL1      | chr20      | ENSG00000080839 | Missense        | c.2155A>G               |
| 2478   | RBM12     | chr20      | ENSG00000244462 | 3'UTR           | c.*2764del              |
| 2479   | RBM28     | chr7       | ENSG00000106344 | Splice site     | c.809+2T>C              |
| 2480   | RBM33     | chr7       | ENSG00000184863 | 3'UTR           | c.*4525del              |
| 2481   | RBM47     | chr4       | ENSG00000163694 | 3'UTR           | c.*1277A>G              |
| 2482   | RBP2      | chr3       | ENSG00000114113 | 3'Flank         |                         |
| 2483   | RBPJ      | chr4       | ENSG00000168214 | 3'UTR           | c.*581 *582del          |
| 2484   | RBPJ      | chr4       | ENSG00000168214 | 3'UTR           | c.*3867A>G              |
| 2485   | RC3H1     | chr1       | ENSG00000135870 | 3'UTR           | c.*6815del              |
| 2486   | RCAN2     | chr6       | ENSG00000172348 | Intron          | c.226-76838del          |
| 2487   | RCBTB2    | chr13      | ENSG00000136161 | Intron          | c.42+59T>C              |
| 2488   | RCC1L     | chr7       | ENSG00000274523 | 3'UTR           | c.*127C>T               |
| 2489   | RCC2      | chr1       | ENSG00000179051 | 3'UTR           | c.*2111C>G              |

| Number | Gene name | Chromosome | Gene_ID         | Mutation        | Nucleotide substitution |
|--------|-----------|------------|-----------------|-----------------|-------------------------|
| 2490   | RCC2      | chr1       | ENSG00000179051 | 3'UTR           | c.*1109C>T              |
| 2491   | RCC2      | chr1       | ENSG00000179051 | 3'UTR           | c.*177del               |
| 2492   | RD3       | chr1       | ENSG00000198570 | Missense        | c.476T>C                |
| 2493   | RDH10     | chr8       | ENSG00000121039 | 3'UTR           | c.*1417del              |
| 2494   | RECQL4    | chr8       | ENSG00000160957 | Missense        | c.837C>T                |
| 2495   | RECQL5    | chr17      | ENSG00000108469 | Missense        | c.221T>C                |
| 2496   | REG1B     | chr2       | ENSG00000172023 | Splice region   | c.65-3del               |
| 2497   | REL       | chr2       | ENSG00000162924 | Intron          | c.11-14T>A              |
| 2498   | RELB      | chr19      | ENSG00000104856 | Intron          | c.887-53A>G             |
| 2499   | REST      | chr4       | ENSG00000084093 | Missense        | c.1435C>G               |
| 2500   | RET       | chr10      | ENSG00000165731 | Missense        | c.539G>A                |
| 2501   | REV3L     | chr6       | ENSG00000009413 | 3'UTR           | c.*748A>G               |
| 2502   | REV3L     | chr6       | ENSG00000009413 | Missense        | c.5467T>C               |
| 2503   | REV3L     | chr6       | ENSG00000009413 | Frame shift del | c.3435del               |
| 2504   | REV3L     | chr6       | ENSG00000009413 | Frame shift del | c.3435del               |
| 2505   | REXO1     | chr19      | ENSG00000079313 | Intron          | c.158-2033T>C           |
| 2506   | REXO2     | chr11      | ENSG00000076043 | 3'UTR           | c.*61del                |
| 2507   | RFC1      | chr4       | ENSG00000035928 | Silent          | c.2454T>C               |
| 2508   | RFC4      | chr3       | ENSG00000163918 | Intron          | c.210+11A>T             |
| 2509   | RFX1      | chr19      | ENSG00000132005 | Silent          | c.2055C>T               |
| 2510   | RFX3      | chr9       | ENSG00000080298 | 3'UTR           | c.*4671A>G              |
| 2511   | RFX3      | chr9       | ENSG00000080298 | 3'UTR           | c.*3912T>C              |
| 2512   | RGL1      | chr1       | ENSG00000143344 | 5'UTR           | c.-5T>C                 |
| 2513   | RGS12     | chr4       | ENSG00000159788 | 5'UTR           | c.-350T>G               |
| 2514   | RGS18     | chr1       | ENSG00000150681 | 3'UTR           | c.*776C>T               |
| 2515   | RGS21     | chr1       | ENSG00000253148 | 3'UTR           | c.*490A>G               |
| 2516   | RGS22     | chr8       | ENSG00000132554 | Intron          | c.2065-11del            |
| 2517   | RGS5      | chr1       | ENSG00000143248 | 3'UTR           | c.*4945G>A              |
| 2518   | RGS5      | chr1       | ENSG00000143248 | 3'UTR           | c.*2564del              |
| 2519   | RGS6      | chr14      | ENSG00000182732 | 3'UTR           | c.*1442del              |
| 2520   | RGS9BP    | chr19      | ENSG00000186326 | Frame shift Ins | c.613_614dup            |
| 2521   | RHO       | chr3       | ENSG00000163914 | Missense        | c.89A>G                 |
| 2522   | RHOA      | chr3       | ENSG00000067560 | Intron          | c.409-699del            |
| 2523   | RHOA      | chr1       | ENSG00000116574 | 3'UTR           | c.*2171G>A              |
| 2524   | RIC1      | chr9       | ENSG00000107036 | Missense        | c.235A>G                |
| 2525   | RIC1      | chr9       | ENSG00000107036 | Missense        | c.2320A>G               |
| 2526   | RIMBP2    | chr12      | ENSG00000060709 | 3'UTR           | c.*1503A>C              |
| 2527   | RIMKLB    | chr12      | ENSG00000166532 | 3'UTR           | c.*311del               |
| 2528   | RIMS2     | chr8       | ENSG00000176406 | Intron          | c.2851+892C>A           |
| 2529   | RIN3      | chr14      | ENSG00000100599 | 3'UTR           | c.*332A>G               |
| 2530   | RIOK2     | chr5       | ENSG00000058729 | 3'UTR           | c.*20A>G                |
| 2531   | RIOK3     | chr18      | ENSG00000101782 | Missense        | c.176T>C                |
| 2532   | RIPOR2    | chr6       | ENSG00000111913 | 3'UTR           | c.*1136del              |
| 2533   | RIPOR2    | chr6       | ENSG00000111913 | 3'UTR           | c.*975del               |
| 2534   | RIT2      | chr18      | ENSG00000152214 | 5'Flank         |                         |
| 2535   | RMC1      | chr18      | ENSG00000141452 | Intron          | c.1007-52T>C            |
| 2536   | RMDN1     | chr8       | ENSG00000176623 | 3'UTR           | c.*232A>T               |
| 2537   | RMDN1     | chr8       | ENSG00000176623 | 3'UTR           | c.*1650del              |
| 2538   | RNF103    | chr2       | ENSG00000239305 | Intron          | c.366+2269T>C           |
| 2539   | RNF112    | chr17      | ENSG00000128482 | Intron          | c.933+31C>T             |
| 2540   | RNF126    | chr19      | ENSG00000070423 | Missense        | c.743A>G                |
| 2541   | RNF149    | chr2       | ENSG00000163162 | 3'UTR           | c.*466del               |
| 2542   | RNF17     | chr13      | ENSG00000132972 | Missense        | c.3385G>C               |



| Number | Gene name  | Chromosome | Gene_ID         | Mutation        | Nucleotide substitution |
|--------|------------|------------|-----------------|-----------------|-------------------------|
| 2543   | RNF183     | chr9       | ENSG00000165188 | 3'Flank         |                         |
| 2544   | RNF20      | chr9       | ENSG00000155827 | Intron          | c.973-26T>C             |
| 2545   | RNF20      | chr9       | ENSG00000155827 | Intron          | c.2509-38T>C            |
| 2546   | RNF207     | chr1       | ENSG00000158286 | 3'UTR           | c.*1673A>T              |
| 2547   | RNF208     | chr9       | ENSG00000212864 | Missense        | c.98T>C                 |
| 2548   | RNF213     | chr17      | ENSG00000173821 | Silent          | c.3960T>C               |
| 2549   | RNF216     | chr7       | ENSG00000011275 | Intron          | c.1121+25del            |
| 2550   | RNF216     | chr7       | ENSG00000011275 | Intron          | c.67+480del             |
| 2551   | RNF217     | chr6       | ENSG00000146373 | Frame shift del | c.387del                |
| 2552   | RNF217     | chr6       | ENSG00000146373 | Intron          | c.882+14del             |
| 2553   | RNF217     | chr6       | ENSG00000146373 | 3'UTR           | c.*9214del              |
| 2554   | RNF217-AS1 | chr6       | ENSG00000236548 | RNA             | n.2113C>T               |
| 2555   | RNF26      | chr11      | ENSG00000173456 | Missense        | c.373A>G                |
| 2556   | RNFT2      | chr12      | ENSG00000135119 | 3'UTR           | c.*1782del              |
| 2557   | RNPC3      | chr1       | ENSG00000185946 | Intron          | c.360-29A>G             |
| 2558   | RNPEP      | chr1       | ENSG00000176393 | Missense        | c.925A>G                |
| 2559   | RO60       | chr1       | ENSG00000116747 | 3'UTR           | c.*726del               |
| 2560   | ROR1       | chr1       | ENSG00000185483 | Missense        | c.434T>C                |
| 2561   | ROR2       | chr9       | ENSG00000169071 | Intron          | c.1183+25del            |
| 2562   | RORA       | chr15      | ENSG00000069667 | 3'UTR           | c.*849del               |
| 2563   | RP1L1      | chr8       | ENSG00000183638 | 3'UTR           | c.*104T>C               |
| 2564   | RP1L1      | chr8       | ENSG00000183638 | Silent          | c.1155G>T               |
| 2565   | RPA2       | chr1       | ENSG00000117748 | Intron          | c.993-26C>T             |
| 2566   | RPAIN      | chr17      | ENSG00000129197 | Intron          | c.314-618del            |
| 2567   | RPAIN      | chr17      | ENSG00000129197 | Intron          | c.314-629T>C            |
| 2568   | RPAP2      | chr1       | ENSG00000122484 | Missense        | c.253G>A                |
| 2569   | RPH3A      | chr12      | ENSG00000089169 | 3'UTR           | c.*1440del              |
| 2570   | RPL22L1    | chr3       | ENSG00000163584 | 3'UTR           | c.*934C>T               |
| 2571   | RPL23      | chr17      | ENSG00000125691 | 3'UTR           | c.*317 *318del          |
| 2572   | RPL3       | chr22      | ENSG00000100316 | Splice region   | c.954T>C                |
| 2573   | RPL31P57   | chr17      | ENSG00000256358 | RNA             | n.348del                |
| 2574   | RPL34      | chr4       | ENSG00000109475 | Intron          | c.65+17A>T              |
| 2575   | RPL37      | chr5       | ENSG00000145592 | 3'UTR           | c.*4771del              |
| 2576   | RPL37      | chr5       | ENSG00000145592 | 3'UTR           | c.*860C>T               |
| 2577   | RPP14      | chr3       | ENSG00000163684 | 3'UTR           | c.*1509 *1510del        |
| 2578   | RPP14      | chr3       | ENSG00000163684 | 3'UTR           | c.*2149del              |
| 2579   | RPS2       | chr16      | ENSG00000140988 | In Frame Del    | c.802 804del            |
| 2580   | RPS6KA4    | chr11      | ENSG00000162302 | Missense        | c.1591C>A               |
| 2581   | RPS6KB1    | chr17      | ENSG00000108443 | Missense        | c.287T>C                |
| 2582   | RPS6KB1    | chr17      | ENSG00000108443 | Missense        | c.1177G>A               |
| 2583   | RRBP1      | chr20      | ENSG00000125844 | Missense        | c.3666G>T               |
| 2584   | RRP1B      | chr21      | ENSG00000160208 | Intron          | c.420-47C>T             |
| 2585   | RSAD2      | chr2       | ENSG00000134321 | 3'UTR           | c.*1212C>T              |
| 2586   | RSBN1      | chr1       | ENSG00000081019 | 3'UTR           | c.*2038del              |
| 2587   | RSF1       | chr11      | ENSG00000048649 | 3'UTR           | c.*4965A>G              |
| 2588   | RSU1       | chr10      | ENSG00000148484 | 3'UTR           | c.*916G>A               |
| 2589   | RTKN2      | chr10      | ENSG00000182010 | Intron          | c.426+67G>C             |
| 2590   | RTN4RL2    | chr11      | ENSG00000186907 | Frame shift del | c.1118del               |
| 2591   | RTN4RL2    | chr11      | ENSG00000186907 | Frame shift del | c.1118del               |
| 2592   | RUBCNL     | chr13      | ENSG00000102445 | Missense        | c.259C>G                |
| 2593   | RUFY3      | chr4       | ENSG00000018189 | Splice region   | c.1557+6A>G             |
| 2594   | RUFY3      | chr4       | ENSG00000018189 | Intron          | c.1650+65C>T            |
| 2595   | RUFY4      | chr2       | ENSG00000188282 | Missense        | c.1511A>G               |

| Number | Gene name | Chromosome | Gene_ID         | Mutation        | Nucleotide substitution |
|--------|-----------|------------|-----------------|-----------------|-------------------------|
| 2596   | RUNDC3B   | chr7       | ENSG00000105784 | 3'UTR           | c.*1088del              |
| 2597   | RUNX1T1   | chr8       | ENSG00000079102 | 3'UTR           | c.*4770del              |
| 2598   | RUNX1T1   | chr8       | ENSG00000079102 | 3'UTR           | c.*1384del              |
| 2599   | RUNX2     | chr6       | ENSG00000124813 | 3'UTR           | c.*123T>A               |
| 2600   | RUSC2     | chr9       | ENSG00000198853 | Silent          | c.3450C>T               |
| 2601   | RUVBL1    | chr3       | ENSG00000175792 | Silent          | c.1023T>C               |
| 2602   | RUVBL2    | chr19      | ENSG00000183207 | 3'UTR           | c.*6A>G                 |
| 2603   | RYR1      | chr19      | ENSG00000196218 | Missense        | c.12883G>C              |
| 2604   | RYR1      | chr19      | ENSG00000196218 | Missense        | c.14954T>C              |
| 2605   | RYR2      | chr1       | ENSG00000198626 | Missense        | c.9205A>G               |
| 2606   | S100A1    | chr1       | ENSG00000160678 | Intron          | c.77-43del              |
| 2607   | S1PR3     | chr9       | ENSG00000213694 | 3'UTR           | c.*3290del              |
| 2608   | SAFB2     | chr19      | ENSG00000130254 | Frame shift del | c.2471del               |
| 2609   | SAFB2     | chr19      | ENSG00000130254 | Frame shift del | c.2471del               |
| 2610   | SAMD3     | chr6       | ENSG00000164483 | 3'UTR           | c.*1292del              |
| 2611   | SAMD5     | chr6       | ENSG00000203727 | 3'UTR           | c.*1843del              |
| 2612   | SAMD5     | chr6       | ENSG00000203727 | 3'UTR           | c.*3840T>C              |
| 2613   | SAP130    | chr2       | ENSG00000136715 | 3'UTR           | c.*710A>G               |
| 2614   | SAP18     | chr13      | ENSG00000150459 | Missense        | c.209T>C                |
| 2615   | SASS6     | chr1       | ENSG00000156876 | Missense        | c.971T>C                |
| 2616   | SASS6     | chr1       | ENSG00000156876 | Silent          | c.522T>C                |
| 2617   | SAV1      | chr14      | ENSG00000151748 | 3'UTR           | c.*352del               |
| 2618   | SAYSD1    | chr6       | ENSG00000112167 | 3'UTR           | c.*420del               |
| 2619   | SBF1      | chr22      | ENSG00000100241 | Intron          | c.2843-44C>G            |
| 2620   | SBSN      | chr19      | ENSG00000189001 | Frame shift Ins | c.1260dup               |
| 2621   | SCAF11    | chr12      | ENSG00000139218 | Silent          | c.1776T>C               |
| 2622   | SCARA5    | chr8       | ENSG00000168079 | Intron          | c.1097-66G>T            |
| 2623   | SCARB2    | chr4       | ENSG00000138760 | 3'UTR           | c.*1716T>C              |
| 2624   | SCD       | chr10      | ENSG00000099194 | 3'UTR           | c.*824del               |
| 2625   | SCFD1     | chr14      | ENSG00000092108 | Intron          | c.-55-3476del           |
| 2626   | SCHIP1    | chr3       | ENSG00000151967 | 5'UTR           | c.-32A>G                |
| 2627   | SCIN      | chr7       | ENSG00000006747 | Intron          | c.1759+68del            |
| 2628   | SCML1     | chrX       | ENSG00000047634 | 3'UTR           | c.*301del               |
| 2629   | SCN11A    | chr3       | ENSG00000168356 | Missense        | c.1245G>T               |
| 2630   | SCN2A     | chr2       | ENSG00000136531 | Missense        | c.2050C>T               |
| 2631   | SCN4A     | chr17      | ENSG00000007314 | Missense        | c.1375G>A               |
| 2632   | SCNN1A    | chr12      | ENSG00000111319 | 3'UTR           | c.*294A>G               |
| 2633   | SCP2      | chr1       | ENSG00000116171 | Intron          | c.949+4803del           |
| 2634   | SCPEP1    | chr17      | ENSG00000121064 | Intron          | c.658-56A>G             |
| 2635   | SCUBE2    | chr11      | ENSG00000175356 | Missense        | c.2753A>G               |
| 2636   | SCYL2     | chr12      | ENSG00000136021 | Intron          | c.969+10T>C             |
| 2637   | SDC3      | chr1       | ENSG00000162512 | 3'UTR           | c.*537C>A               |
| 2638   | SDF4      | chr1       | ENSG00000078808 | 3'UTR           | c.*526C>T               |
| 2639   | SDHB      | chr1       | ENSG00000117118 | Silent          | c.180T>C                |
| 2640   | SEC14L3   | chr22      | ENSG00000100012 | 3'UTR           | c.*591A>G               |
| 2641   | SEC16A    | chr9       | ENSG00000148396 | Splice site     | c.1341+2T>C             |
| 2642   | SEC24A    | chr5       | ENSG00000113615 | 3'UTR           | c.*2067del              |
| 2643   | SECISBP2L | chr15      | ENSG00000138593 | Frame shift del | c.1545del               |
| 2644   | SECISBP2L | chr15      | ENSG00000138593 | Frame shift del | c.1545del               |
| 2645   | SEL1L     | chr14      | ENSG00000071537 | Missense        | c.895T>A                |
| 2646   | SELENOS   | chr15      | ENSG00000131871 | Missense        | c.134A>G                |
| 2647   | SELPLG    | chr12      | ENSG00000110876 | Missense        | c.808A>G                |
| 2648   | SELPLG    | chr12      | ENSG00000110876 | Missense        | c.199T>C                |

| Number | Gene name | Chromosome | Gene_ID         | Mutation        | Nucleotide substitution |
|--------|-----------|------------|-----------------|-----------------|-------------------------|
| 2649   | SEMA3C    | chr7       | ENSG00000075223 | Silent          | c.1152A>G               |
| 2650   | SEMA3D    | chr7       | ENSG00000153993 | Silent          | c.1710T>C               |
| 2651   | SEMA3D    | chr7       | ENSG00000153993 | Splice region   | c.1047-5del             |
| 2652   | SEMA3E    | chr7       | ENSG00000170381 | 3'UTR           | c.*2056C>T              |
| 2653   | SEMA3E    | chr7       | ENSG00000170381 | Frame shift del | c.761del                |
| 2654   | SEMA3E    | chr7       | ENSG00000170381 | Frame shift del | c.761del                |
| 2655   | SEMA6A    | chr5       | ENSG00000092421 | 3'UTR           | c.*423G>A               |
| 2656   | SEMA6A    | chr5       | ENSG00000092421 | Silent          | c.2577G>A               |
| 2657   | SEMA6C    | chr1       | ENSG00000143434 | Missense        | c.307T>C                |
| 2658   | SENP1     | chr12      | ENSG00000079387 | 3'UTR           | c.*2336del              |
| 2659   | SENP6     | chr6       | ENSG00000112701 | Intron          | c.1406-57del            |
| 2660   | SEPHS1    | chr10      | ENSG00000086475 | Missense        | c.1120G>A               |
| 2661   | SEPTIN7   | chr7       | ENSG00000122545 | Intron          | c.61+10883del           |
| 2662   | SEPTIN7   | chr7       | ENSG00000122545 | Missense        | c.1202G>A               |
| 2663   | SERINC3   | chr20      | ENSG00000132824 | 3'UTR           | c.*1415del              |
| 2664   | SERPINA9  | chr14      | ENSG00000170054 | Silent          | c.933C>T                |
| 2665   | SERPINC1  | chr1       | ENSG00000117601 | Missense        | c.847A>G                |
| 2666   | SERTAD2   | chr2       | ENSG00000179833 | Missense        | c.440A>G                |
| 2667   | SESTD1    | chr2       | ENSG00000187231 | 3'UTR           | c.*1300del              |
| 2668   | SET       | chr9       | ENSG00000119335 | Splice region   | c.378+3A>G              |
| 2669   | SET       | chr9       | ENSG00000119335 | 3'UTR           | c.*1069T>C              |
| 2670   | SETBP1    | chr18      | ENSG00000152217 | Nonsense        | c.2836C>T               |
| 2671   | SETD4     | chr21      | ENSG00000185917 | Splice region   | c.1+6T>C                |
| 2672   | SETD7     | chr4       | ENSG00000145391 | 3'UTR           | c.*823T>C               |
| 2673   | SETDB1    | chr1       | ENSG00000143379 | 3'UTR           | c.*327A>G               |
| 2674   | SEZ6L     | chr22      | ENSG00000100095 | Missense        | c.575C>T                |
| 2675   | SF3B3     | chr16      | ENSG00000189091 | Splice region   | c.2134-5del             |
| 2676   | SF3B3     | chr16      | ENSG00000189091 | Splice region   | c.2134-8C>T             |
| 2677   | SFMBT1    | chr3       | ENSG00000163935 | Silent          | c.777A>G                |
| 2678   | SFN       | chr1       | ENSG00000175793 | 3'UTR           | c.*405 *408del          |
| 2679   | SFN       | chr1       | ENSG00000175793 | 3'UTR           | c.*414 *415del          |
| 2680   | SGK1      | chr6       | ENSG00000118515 | Silent          | c.1111C>T               |
| 2681   | SH2D3C    | chr9       | ENSG00000095370 | 5'UTR           | c.-177A>G               |
| 2682   | SH2D4A    | chr8       | ENSG00000104611 | Intron          | c.1273-19C>T            |
| 2683   | SH3BP5    | chr3       | ENSG00000131370 | 3'UTR           | c.*510del               |
| 2684   | SH3D21    | chr1       | ENSG00000214193 | Intron          | c.162+35A>G             |
| 2685   | SH3KBP1   | chrX       | ENSG00000147010 | 3'UTR           | c.*2303del              |
| 2686   | SH3PXD2B  | chr5       | ENSG00000174705 | 3'UTR           | c.*962C>A               |
| 2687   | SHC2      | chr19      | ENSG00000129946 | Intron          | c.774+18 774+19insT     |
| 2688   | SHC4      | chr15      | ENSG00000185634 | Missense        | c.1294A>G               |
| 2689   | SHC4      | chr15      | ENSG00000185634 | Frame shift del | c.1043del               |
| 2690   | SHC4      | chr15      | ENSG00000185634 | Frame shift del | c.1043del               |
| 2691   | SHC4      | chr15      | ENSG00000185634 | Silent          | c.690C>T                |
| 2692   | SHE       | chr1       | ENSG00000169291 | 3'UTR           | c.*445A>G               |
| 2693   | SHISA5    | chr3       | ENSG00000164054 | 5'UTR           | c.-310del               |
| 2694   | SHISA6    | chr17      | ENSG00000188803 | Missense        | c.1366G>A               |
| 2695   | SHISA7    | chr19      | ENSG00000187902 | Frame shift del | c.1076del               |
| 2696   | SHKBP1    | chr19      | ENSG00000160410 | Missense        | c.928G>A                |
| 2697   | SHOC1     | chr9       | ENSG00000165181 | Intron          | c.2663+47A>G            |
| 2698   | SHOC2     | chr10      | ENSG00000108061 | 3'UTR           | c.*1775del              |
| 2699   | SHROOM3   | chr4       | ENSG00000138771 | Intron          | c.323+19859A>G          |
| 2700   | SHROOM3   | chr4       | ENSG00000138771 | Silent          | c.3681A>G               |
| 2701   | SHROOM4   | chrX       | ENSG00000158352 | Nonsense        | c.3178G>T               |

| Number | Gene name | Chromosome | Gene_ID         | Mutation        | Nucleotide substitution |
|--------|-----------|------------|-----------------|-----------------|-------------------------|
| 2702   | SHTN1     | chr10      | ENSG00000187164 | 3'UTR           | c.*14del                |
| 2703   | SI        | chr3       | ENSG00000090402 | Splice region   | c.4180-4del             |
| 2704   | SIAE      | chr11      | ENSG00000110013 | 3'UTR           | c.*1007del              |
| 2705   | SIGLEC15  | chr18      | ENSG00000197046 | Intron          | c.906-52T>C             |
| 2706   | SIGLEC7   | chr19      | ENSG00000168995 | Frame shift del | c.979del                |
| 2707   | SIGLEC7   | chr19      | ENSG00000168995 | Frame shift del | c.979del                |
| 2708   | SIK2      | chr11      | ENSG00000170145 | Silent          | c.780A>G                |
| 2709   | SIK2      | chr11      | ENSG00000170145 | 3'UTR           | c.*262 *263del          |
| 2710   | SIPA1     | chr11      | ENSG00000213445 | Intron          | c.2637+32G>A            |
| 2711   | SIRPB2    | chr20      | ENSG00000196209 | Intron          | c.859+414dup            |
| 2712   | SIRT5     | chr6       | ENSG00000124523 | 3'UTR           | c.*174A>T               |
| 2713   | SIX1      | chr14      | ENSG00000126778 | 3'UTR           |                         |
| 2714   | SIX5      | chr19      | ENSG00000177045 | 3'UTR           | c.*259T>C               |
| 2715   | SKP1      | chr5       | ENSG00000113558 | Intron          | c.97+2943del            |
| 2716   | SLAMF1    | chr1       | ENSG00000117090 | 3'UTR           | c.*2205A>G              |
| 2717   | SLAMF8    | chr1       | ENSG00000158714 | 3'UTR           | c.*762G>T               |
| 2718   | SLC11A2   | chr12      | ENSG00000110911 | 3'UTR           | c.*337A>T               |
| 2719   | SLC12A2   | chr5       | ENSG00000064651 | 3'UTR           | c.*2307 *2308del        |
| 2720   | SLC12A4   | chr16      | ENSG00000124067 | Missense        | c.1673T>C               |
| 2721   | SLC12A6   | chr15      | ENSG00000140199 | Splice site     | c.2889+1G>A             |
| 2722   | SLC14A2   | chr18      | ENSG00000132874 | Silent          | c.1182C>T               |
| 2723   | SLC15A2   | chr3       | ENSG00000163406 | Intron          | c.1571+51del            |
| 2724   | SLC15A2   | chr3       | ENSG00000163406 | 3'UTR           | c.*2268 *2269del        |
| 2725   | SLC16A1   | chr1       | ENSG00000155380 | Silent          | c.1065A>G               |
| 2726   | SLC16A2   | chrX       | ENSG00000147100 | 5'UTR           | c.-29G>A                |
| 2727   | SLC16A4   | chr1       | ENSG00000168679 | Missense        | c.533T>A                |
| 2728   | SLC16A7   | chr12      | ENSG00000118596 | 3'UTR           | c.*533 *534del          |
| 2729   | SLC17A4   | chr6       | ENSG00000146039 | Frame shift Ins | c.37dup                 |
| 2730   | SLC17A5   | chr6       | ENSG00000119899 | 3'UTR           | c.*1366A>G              |
| 2731   | SLC17A6   | chr11      | ENSG00000091664 | 3'UTR           | c.*827del               |
| 2732   | SLC18A2   | chr10      | ENSG00000165646 | Intron          | c.121+46G>A             |
| 2733   | SLC18A2   | chr10      | ENSG00000165646 | Intron          | c.465-44del             |
| 2734   | SLC19A1   | chr21      | ENSG00000173638 | 3'UTR           | c.*2491dup              |
| 2735   | SLC19A2   | chr1       | ENSG00000117479 | 5'Flank         |                         |
| 2736   | SLC20A2   | chr8       | ENSG00000168575 | Frame shift del | c.687del                |
| 2737   | SLC20A2   | chr8       | ENSG00000168575 | Frame shift del | c.687del                |
| 2738   | SLC22A4   | chr5       | ENSG00000197208 | Missense        | c.928G>A                |
| 2739   | SLC22A5   | chr5       | ENSG00000197375 | Missense        | c.1652T>C               |
| 2740   | SLC23A3   | chr2       | ENSG00000213901 | Splice site     | c.418+2 418+3del        |
| 2741   | SLC25A21  | chr14      | ENSG00000183032 | 3'UTR           | c.*587del               |
| 2742   | SLC25A27  | chr6       | ENSG00000153291 | 3'UTR           | c.*518A>G               |
| 2743   | SLC25A3   | chr12      | ENSG00000075415 | Missense        | c.714A>C                |
| 2744   | SLC25A46  | chr5       | ENSG00000164209 | 3'UTR           | c.*900A>T               |
| 2745   | SLC26A10  | chr12      | ENSG00000135502 | 5'UTR           | c.-207A>G               |
| 2746   | SLC26A5   | chr7       | ENSG00000170615 | Intron          | c.2041+7388A>T          |
| 2747   | SLC26A6   | chr3       | ENSG00000225697 | Missense        | c.1687C>A               |
| 2748   | SLC26A9   | chr1       | ENSG00000174502 | Missense        | c.1763T>C               |
| 2749   | SLC29A1   | chr6       | ENSG00000112759 | Splice site     | c.-51-2A>G              |
| 2750   | SLC2A4RG  | chr20      | ENSG00000125520 | Missense        | c.1087G>A               |
| 2751   | SLC30A10  | chr1       | ENSG00000196660 | Missense        | c.854T>C                |
| 2752   | SLC30A7   | chr1       | ENSG00000162695 | Missense        | c.710T>C                |
| 2753   | SLC35A3   | chr1       | ENSG00000117620 | 3'UTR           | c.*1551del              |
| 2754   | SLC35D1   | chr1       | ENSG00000116704 | 3'UTR           | c.*4459T>C              |

| Number | Gene name | Chromosome | Gene_ID         | Mutation        | Nucleotide substitution |
|--------|-----------|------------|-----------------|-----------------|-------------------------|
| 2755   | SLC35E1   | chr19      | ENSG00000127526 | Intron          | c.559-1742del           |
| 2756   | SLC35E3   | chr12      | ENSG00000175782 | 3'UTR           | c.*456dup               |
| 2757   | SLC35F6   | chr2       | ENSG00000213699 | Intron          | c.323-23G>A             |
| 2758   | SLC38A1   | chr12      | ENSG00000111371 | Intron          | c.388+91A>G             |
| 2759   | SLC38A11  | chr2       | ENSG00000169507 | 3'UTR           | c.*2122T>C              |
| 2760   | SLC38A7   | chr16      | ENSG00000103042 | Missense        | c.284C>T                |
| 2761   | SLC45A1   | chr1       | ENSG00000162426 | Silent          | c.1155C>T               |
| 2762   | SLC45A4   | chr8       | ENSG00000022567 | 3'UTR           | c.*3680del              |
| 2763   | SLC4A2    | chr7       | ENSG00000164889 | Intron          | c.3619-36del            |
| 2764   | SLC4A4    | chr4       | ENSG00000080493 | Intron          | c.2281-21del            |
| 2765   | SLC4A9    | chr5       | ENSG00000113073 | Intron          | c.562-56T>C             |
| 2766   | SLC50A1   | chr1       | ENSG00000169241 | 5'UTR           | c.-118G>A               |
| 2767   | SLC5A1    | chr22      | ENSG00000100170 | Silent          | c.1752T>C               |
| 2768   | SLC5A10   | chr17      | ENSG00000154025 | Intron          | c.598-1145del           |
| 2769   | SLC5A12   | chr11      | ENSG00000148942 | 3'UTR           | c.*621del               |
| 2770   | SLC5A9    | chr1       | ENSG00000117834 | 3'UTR           | c.*589G>C               |
| 2771   | SLC66A1L  | chr3       | ENSG00000174899 | 3'UTR           | c.*442G>A               |
| 2772   | SLC6A15   | chr12      | ENSG00000072041 | 3'UTR           | c.*2075T>C              |
| 2773   | SLC6A4    | chr17      | ENSG00000108576 | 3'UTR           | c.*2172del              |
| 2774   | SLC6A7    | chr5       | ENSG00000011083 | 3'UTR           | c.*888C>T               |
| 2775   | SLC7A1    | chr13      | ENSG00000139514 | 3'UTR           | c.*1313G>A              |
| 2776   | SLC7A11   | chr4       | ENSG00000151012 | 3'UTR           | c.*2900T>A              |
| 2777   | SLC7A13   | chr8       | ENSG00000164893 | Frame shift del | c.372del                |
| 2778   | SLC7A13   | chr8       | ENSG00000164893 | Frame shift del | c.372del                |
| 2779   | SLC7A9    | chr19      | ENSG00000021488 | Nonsense        | c.79C>T                 |
| 2780   | SLC8A1    | chr2       | ENSG00000183023 | Intron          | c.1954+26A>G            |
| 2781   | SLC8A3    | chr14      | ENSG00000100678 | 3'UTR           | c.*694A>G               |
| 2782   | SLC8A3    | chr14      | ENSG00000100678 | Intron          | c.-85-16 -85-15del      |
| 2783   | SLC9A1    | chr1       | ENSG00000090020 | 3'UTR           | c.*827T>C               |
| 2784   | SLC9A1    | chr1       | ENSG00000090020 | Missense        | c.359A>G                |
| 2785   | SLC9A2    | chr2       | ENSG00000115616 | 3'UTR           | c.*1320del              |
| 2786   | SLC9B2    | chr4       | ENSG00000164038 | 3'UTR           | c.*205del               |
| 2787   | SLCO4A1   | chr20      | ENSG00000101187 | 5'Flank         |                         |
| 2788   | SLFN13    | chr17      | ENSG00000154760 | 3'UTR           | c.*2864del              |
| 2789   | SLIT1     | chr10      | ENSG00000187122 | 3'UTR           | c.*211del               |
| 2790   | SLIT2     | chr4       | ENSG00000145147 | Intron          | c.2429+49del            |
| 2791   | SLITRK1   | chr13      | ENSG00000178235 | 5'UTR           | c.-246 -245del          |
| 2792   | SLITRK2   | chrX       | ENSG00000185985 | 5'UTR           | c.-430 -429del          |
| 2793   | SLMAP     | chr3       | ENSG00000163681 | Intron          | c.457-34T>C             |
| 2794   | SMAD2     | chr18      | ENSG00000175387 | 3'UTR           | c.*8896del              |
| 2795   | SMAD7     | chr18      | ENSG00000101665 | Frame shift del | c.626del                |
| 2796   | SMAD7     | chr18      | ENSG00000101665 | Frame shift del | c.626del                |
| 2797   | SMAD9     | chr13      | ENSG00000120693 | 3'UTR           | c.*3046del              |
| 2798   | SMARCA2   | chr9       | ENSG00000080503 | Intron          | c.9+545del              |
| 2799   | SMARCA4   | chr19      | ENSG00000127616 | Silent          | c.2934A>G               |
| 2800   | SMARCA5   | chr4       | ENSG00000153147 | 3'UTR           | c.*1873C>T              |
| 2801   | SMARCA5   | chr4       | ENSG00000153147 | 3'UTR           | c.*3307del              |
| 2802   | SMARCC1   | chr3       | ENSG00000173473 | 3'UTR           | c.*2808C>T              |
| 2803   | SMARCC1   | chr3       | ENSG00000173473 | 3'UTR           | c.*977del               |
| 2804   | SMARCC2   | chr12      | ENSG00000139613 | Missense        | c.2735T>C               |
| 2805   | SMARCD3   | chr7       | ENSG00000082014 | Intron          | c.778-9T>C              |
| 2806   | SMARCE1   | chr17      | ENSG00000073584 | 3'UTR           | c.*1142A>G              |
| 2807   | SMC5      | chr9       | ENSG00000198887 | Silent          | c.1797A>G               |

| Number | Gene name | Chromosome | Gene_ID         | Mutation        | Nucleotide substitution |
|--------|-----------|------------|-----------------|-----------------|-------------------------|
| 2808   | SMC6      | chr2       | ENSG00000163029 | Nonsense        | c.865C>T                |
| 2809   | SMCHD1    | chr18      | ENSG00000101596 | Silent          | c.3567T>C               |
| 2810   | SMCHD1    | chr18      | ENSG00000101596 | Intron          | c.4434+17del            |
| 2811   | SMCR8     | chr17      | ENSG00000176994 | Silent          | c.1539C>T               |
| 2812   | SMG1      | chr16      | ENSG00000157106 | 3'UTR           | c.*1820del              |
| 2813   | SMG5      | chr1       | ENSG00000198952 | 3'UTR           | c.*1355del              |
| 2814   | SMG7      | chr1       | ENSG00000116698 | Splice site     | c.1415+2T>C             |
| 2815   | SMG8      | chr17      | ENSG00000167447 | Missense        | c.1426T>A               |
| 2816   | SMIM13    | chr6       | ENSG00000224531 | 3'UTR           | c.*3699T>A              |
| 2817   | SMIM29    | chr6       | ENSG00000186577 | Missense        | c.131A>G                |
| 2818   | SMOC2     | chr6       | ENSG00000112562 | Intron          | c.1357-10dup            |
| 2819   | SMPD2     | chr6       | ENSG00000135587 | Intron          | c.625-30C>T             |
| 2820   | SMU1      | chr9       | ENSG00000122692 | 3'UTR           | c.*2452A>G              |
| 2821   | SMU1      | chr9       | ENSG00000122692 | 3'UTR           | c.*924A>G               |
| 2822   | SMYD3     | chr1       | ENSG00000185420 | Intron          | c.1185+47del            |
| 2823   | SMYD4     | chr17      | ENSG00000186532 | Intron          | c.1537+26T>C            |
| 2824   | SNAPC1    | chr14      | ENSG00000023608 | 3'UTR           | c.*743del               |
| 2825   | SNCB      | chr5       | ENSG00000074317 | 3'UTR           | c.*693C>T               |
| 2826   | SNRNP200  | chr2       | ENSG00000144028 | Intron          | c.2421+52T>C            |
| 2827   | SNRNP48   | chr6       | ENSG00000168566 | 3'UTR           | c.*984C>T               |
| 2828   | SNRPF     | chr12      | ENSG00000139343 | Intron          | c.195-54A>G             |
| 2829   | SNTA1     | chr20      | ENSG00000101400 | Missense        | c.657G>A                |
| 2830   | SNTG1     | chr8       | ENSG00000147481 | Intron          | c.550-29del             |
| 2831   | SNTN      | chr3       | ENSG00000188817 | 3'UTR           | c.*568 *569dup          |
| 2832   | SNUPN     | chr15      | ENSG00000169371 | Intron          | c.-6+1000del            |
| 2833   | SOBP      | chr6       | ENSG00000112320 | Missense        | c.2057A>G               |
| 2834   | SOCS1     | chr16      | ENSG00000185338 | 5'UTR           | c.-28C>T                |
| 2835   | SOD2      | chr6       | ENSG00000112096 | 3'UTR           | c.*1312T>C              |
| 2836   | SOD2      | chr6       | ENSG00000285441 | 5'UTR           | c.-996dup               |
| 2837   | SOGA1     | chr20      | ENSG00000149639 | Intron          | c.1135-37T>C            |
| 2838   | SOGA3     | chr6       | ENSG00000214338 | 3'UTR           | c.*209A>G               |
| 2839   | SOGA3     | chr6       | ENSG00000214338 | Missense        | c.1178A>G               |
| 2840   | SON       | chr21      | ENSG00000159140 | Missense        | c.5957G>A               |
| 2841   | SON       | chr21      | ENSG00000159140 | 3'UTR           | c.*78T>C                |
| 2842   | SORBS1    | chr10      | ENSG00000095637 | Silent          | c.870C>A                |
| 2843   | SORBS2    | chr4       | ENSG00000154556 | Intron          | c.379+77T>C             |
| 2844   | SORCS1    | chr10      | ENSG00000108018 | Nonsense        | c.959G>A                |
| 2845   | SORCS2    | chr4       | ENSG00000184985 | 3'UTR           | c.*1186del              |
| 2846   | SORCS3    | chr10      | ENSG00000156395 | Missense        | c.2033G>A               |
| 2847   | SORL1     | chr11      | ENSG00000137642 | Silent          | c.951C>T                |
| 2848   | SORL1     | chr11      | ENSG00000137642 | 3'UTR           | c.*1071del              |
| 2849   | SOX13     | chr1       | ENSG00000143842 | 3'UTR           | c.*1564A>G              |
| 2850   | SOX2      | chr3       | ENSG00000181449 | Silent          | c.789G>A                |
| 2851   | SP6       | chr17      | ENSG00000189120 | Frame shift del | c.461del                |
| 2852   | SP6       | chr17      | ENSG00000189120 | Frame shift del | c.461del                |
| 2853   | SP8       | chr7       | ENSG00000164651 | Frame shift del | c.1443del               |
| 2854   | SP8       | chr7       | ENSG00000164651 | Frame shift del | c.1443del               |
| 2855   | SP9       | chr2       | ENSG00000217236 | Intron          | c.22-16A>C              |
| 2856   | SPAG5     | chr17      | ENSG00000076382 | Missense        | c.1933T>C               |
| 2857   | SPATA1    | chr1       | ENSG00000122432 | Missense        | c.865A>G                |
| 2858   | SPATA6    | chr1       | ENSG00000132122 | 3'UTR           | c.*876del               |
| 2859   | SPCS2P4   | chr1       | ENSG00000228589 | RNA             | n.12A>G                 |
| 2860   | SPCS3     | chr4       | ENSG00000129128 | 3'UTR           | c.*730del               |

| Number | Gene name  | Chromosome | Gene_ID         | Mutation      | Nucleotide substitution |
|--------|------------|------------|-----------------|---------------|-------------------------|
| 2861   | SPDYE1     | chr7       | ENSG00000136206 | Missense      | c.956A>G                |
| 2862   | SPIDR      | chr8       | ENSG00000164808 | Intron        | c.1545-148C>T           |
| 2863   | SPIN1      | chr9       | ENSG00000106723 | 3'UTR         | c.*332G>A               |
| 2864   | SPIN3      | chrX       | ENSG00000204271 | 5'Flank       |                         |
| 2865   | SPIN4      | chrX       | ENSG00000186767 | 3'UTR         | c.*1460del              |
| 2866   | SPIN4      | chrX       | ENSG00000186767 | 3'UTR         | c.*1121del              |
| 2867   | SPIN4      | chrX       | ENSG00000186767 | 5'UTR         | c.-478A>G               |
| 2868   | SPOCK1     | chr5       | ENSG00000152377 | Intron        | c.404-29del             |
| 2869   | SPOCK1     | chr5       | ENSG00000152377 | Intron        | c.187-11del             |
| 2870   | SPOP       | chr17      | ENSG00000121067 | Missense      | c.146G>A                |
| 2871   | SPPL2A     | chr15      | ENSG00000138600 | 3'UTR         | c.*296del               |
| 2872   | SPPL2A     | chr15      | ENSG00000138600 | Missense      | c.35C>T                 |
| 2873   | SPRED1     | chr15      | ENSG00000166068 | 3'UTR         | c.*1483del              |
| 2874   | SPRED2     | chr2       | ENSG00000198369 | 5'UTR         | c.-110del               |
| 2875   | SPSB1      | chr1       | ENSG00000171621 | Missense      | c.107G>A                |
| 2876   | SPSB2      | chr12      | ENSG00000111671 | Missense      | c.377G>A                |
| 2877   | SPSB4      | chr3       | ENSG00000175093 | Intron        | c.695-14957del          |
| 2878   | SPTA1      | chr1       | ENSG00000163554 | Missense      | c.1016C>A               |
| 2879   | SPTAN1     | chr9       | ENSG00000197694 | Missense      | c.2963T>C               |
| 2880   | SPTBN1     | chr2       | ENSG00000115306 | 3'UTR         | c.*2179A>G              |
| 2881   | SPTBN4     | chr19      | ENSG00000160460 | Intron        | c.4360-27C>T            |
| 2882   | SPTBN5     | chr15      | ENSG00000137877 | Splice region | c.10836-8 10836-7insT   |
| 2883   | SPTBN5     | chr15      | ENSG00000137877 | Intron        | c.10836-34A>G           |
| 2884   | SPTBN5     | chr15      | ENSG00000137877 | Missense      | c.6599C>T               |
| 2885   | SPTY2D1    | chr11      | ENSG00000179119 | 3'UTR         | c.*2992del              |
| 2886   | SPZ1       | chr5       | ENSG00000164299 | Silent        | c.1266A>G               |
| 2887   | SRCAP      | chr16      | ENSG00000080603 | Intron        | c.857-51C>A             |
| 2888   | SRD5A3     | chr4       | ENSG00000128039 | 3'UTR         | c.*2328del              |
| 2889   | SRFBP1     | chr5       | ENSG00000151304 | 3'UTR         | c.*52del                |
| 2890   | SRGAP1     | chr12      | ENSG00000196935 | 3'UTR         | c.*3715del              |
| 2891   | SRGAP2     | chr1       | ENSG00000266028 | Silent        | c.2172C>T               |
| 2892   | SRP14      | chr15      | ENSG00000140319 | Intron        | c.211-258dup            |
| 2893   | SRP19      | chr5       | ENSG00000153037 | 3'UTR         | c.*30A>G                |
| 2894   | SRPK2      | chr7       | ENSG00000135250 | Intron        | c.1883-10del            |
| 2895   | SRPRA      | chr11      | ENSG00000182934 | Missense      | c.1202G>A               |
| 2896   | SRRM1      | chr1       | ENSG00000133226 | Silent        | c.568A>C                |
| 2897   | SRRM1      | chr1       | ENSG00000133226 | 3'UTR         | c.*343dup               |
| 2898   | SRRM4      | chr12      | ENSG00000139767 | 3'UTR         | c.*5127del              |
| 2899   | SRSF11     | chr1       | ENSG00000116754 | 3'UTR         | c.*1058C>T              |
| 2900   | SRSF12     | chr6       | ENSG00000154548 | 3'UTR         | c.*1498T>G              |
| 2901   | SSBP4      | chr19      | ENSG00000130511 | Intron        | c.1020+43del            |
| 2902   | SSC5D      | chr19      | ENSG00000179954 | Missense      | c.4186T>C               |
| 2903   | SSH1       | chr12      | ENSG00000084112 | 3'UTR         | c.*4090A>G              |
| 2904   | SSH2       | chr17      | ENSG00000141298 | Missense      | c.1232A>G               |
| 2905   | SSPO       | chr7       | ENSG00000197558 | Intron        | c.7279+39del            |
| 2906   | SSPO       | chr7       | ENSG00000197558 | Missense      | c.8770G>A               |
| 2907   | SSR1       | chr6       | ENSG00000124783 | 3'UTR         | c.*7983dup              |
| 2908   | SSRP1      | chr11      | ENSG00000149136 | 3'UTR         | c.*14T>C                |
| 2909   | SSX2IP     | chr1       | ENSG00000117155 | 3'UTR         | c.*560T>C               |
| 2910   | SSX3       | chrX       | ENSG00000165584 | Missense      | c.464C>G                |
| 2911   | ST3GAL1    | chr8       | ENSG00000008513 | 3'UTR         | c.*2518G>A              |
| 2912   | ST5        | chr11      | ENSG00000166444 | 5'UTR         | c.-132T>C               |
| 2913   | ST6GALNAC3 | chr1       | ENSG00000184005 | Intron        | c.18+67950del           |

| Number | Gene name | Chromosome | Gene_ID         | Mutation               | Nucleotide substitution |
|--------|-----------|------------|-----------------|------------------------|-------------------------|
| 2914   | ST7L      | chr1       | ENSG00000007341 | Missense               | c.7C>A                  |
| 2915   | ST8SIA4   | chr5       | ENSG00000113532 | 3'UTR                  | c.*1955del              |
| 2916   | STAB2     | chr12      | ENSG00000136011 | Intron                 | c.2259+11A>G            |
| 2917   | STAM      | chr10      | ENSG00000136738 | 5'UTR                  | c.-174T>C               |
| 2918   | STARD8    | chrX       | ENSG00000130052 | Intron                 | c.-7-1142C>A            |
| 2919   | STAT3     | chr17      | ENSG00000168610 | 3'UTR                  | c.*1421C>T              |
| 2920   | STEAP1B   | chr7       | ENSG00000105889 | 3'UTR                  | c.*66A>G                |
| 2921   | STEAP3    | chr2       | ENSG00000115107 | Missense               | c.554T>C                |
| 2922   | STIM2     | chr4       | ENSG00000109689 | 3'UTR                  | c.*1270del              |
| 2923   | STIP1     | chr11      | ENSG00000168439 | 5'UTR                  | c.-92T>C                |
| 2924   | STK26     | chrX       | ENSG00000134602 | Splice region          | c.330+7A>G              |
| 2925   | STK26     | chrX       | ENSG00000134602 | 3'UTR                  | c.*409del               |
| 2926   | STK32A    | chr5       | ENSG00000169302 | 3'UTR                  | c.*2857del              |
| 2927   | STK4      | chr20      | ENSG00000101109 | Intron                 | c.245+10T>C             |
| 2928   | STK40     | chr1       | ENSG00000196182 | Intron                 | c.624-30A>G             |
| 2929   | STRADA    | chr17      | ENSG00000266173 | Intron                 | c.-51-91G>A             |
| 2930   | STRBP     | chr9       | ENSG00000165209 | Translation Start Site | c.1A>G                  |
| 2931   | STUM      | chr1       | ENSG00000203685 | 3'UTR                  | c.*2013A>G              |
| 2932   | STX12     | chr1       | ENSG00000117758 | 3'UTR                  | c.*1745del              |
| 2933   | STX1B     | chr16      | ENSG00000099365 | 3'UTR                  | c.*1684T>C              |
| 2934   | STXBP4    | chr17      | ENSG00000166263 | 3'UTR                  | c.*2567T>C              |
| 2935   | STXBP5L   | chr3       | ENSG00000145087 | Intron                 | c.287+26C>A             |
| 2936   | SUCO      | chr1       | ENSG00000094975 | Missense               | c.2999T>C               |
| 2937   | SUFU      | chr10      | ENSG00000107882 | Intron                 | c.756+43A>G             |
| 2938   | SUMO1     | chr2       | ENSG00000116030 | 3'UTR                  | c.*363del               |
| 2939   | SUPT3H    | chr6       | ENSG00000196284 | Intron                 | c.101+36922del          |
| 2940   | SUPT6H    | chr17      | ENSG00000109111 | Intron                 | c.2838+17A>C            |
| 2941   | SUPT6H    | chr17      | ENSG00000109111 | Missense               | c.4216G>A               |
| 2942   | SUPV3L1   | chr10      | ENSG00000156502 | Missense               | c.812A>G                |
| 2943   | SURF4     | chr9       | ENSG00000148248 | 3'UTR                  | c.*401T>A               |
| 2944   | SUSD1     | chr9       | ENSG00000106868 | Missense               | c.687G>A                |
| 2945   | SUSD3     | chr9       | ENSG00000157303 | 5'Flank                |                         |
| 2946   | SUSD6     | chr14      | ENSG00000100647 | 3'UTR                  | c.*1840T>C              |
| 2947   | SUZ12     | chr17      | ENSG00000178691 | 3'UTR                  | c.*738T>C               |
| 2948   | SV2A      | chr1       | ENSG00000159164 | Missense               | c.1958C>A               |
| 2949   | SV2C      | chr5       | ENSG00000122012 | 3'UTR                  | c.*443 *444del          |
| 2950   | SV2C      | chr5       | ENSG00000122012 | 3'UTR                  | c.*8388del              |
| 2951   | SWAP70    | chr11      | ENSG00000133789 | 3'UTR                  | c.*1342A>G              |
| 2952   | SYAP1     | chrX       | ENSG00000169895 | 3'UTR                  | c.*4347del              |
| 2953   | SYBU      | chr8       | ENSG00000147642 | Intron                 | c.-128-26055del         |
| 2954   | SYCE1     | chr10      | ENSG00000171772 | 3'UTR                  | c.*363del               |
| 2955   | SYCP3     | chr12      | ENSG00000139351 | Splice site            | c.658-1G>A              |
| 2956   | SYMPK     | chr19      | ENSG00000125755 | 3'UTR                  | c.*137 *138del          |
| 2957   | SYNCRIP   | chr6       | ENSG00000135316 | 3'UTR                  | c.*1684A>G              |
| 2958   | SYNE1     | chr6       | ENSG00000131018 | Missense               | c.23389C>T              |
| 2959   | SYNPO     | chr5       | ENSG00000171992 | Frame shift Ins        | c.2178 2181dup          |
| 2960   | SYNPO2    | chr4       | ENSG00000172403 | 3'UTR                  | c.*3050del              |
| 2961   | SYPL1     | chr7       | ENSG00000008282 | Intron                 | c.645+176A>G            |
| 2962   | SYPL2     | chr1       | ENSG00000143028 | Intron                 | c.54+19G>T              |
| 2963   | SYPL2     | chr1       | ENSG00000143028 | 3'UTR                  | c.*1379A>G              |
| 2964   | SYT1      | chr12      | ENSG00000067715 | 3'UTR                  | c.*1704T>C              |
| 2965   | SYT13     | chr11      | ENSG00000019505 | 3'UTR                  | c.*3745A>G              |
| 2966   | SYT13     | chr11      | ENSG00000019505 | Splice region          | c.410-7T>A              |



| Number | Gene name | Chromosome | Gene_ID         | Mutation        | Nucleotide substitution |
|--------|-----------|------------|-----------------|-----------------|-------------------------|
| 2967   | SYT17     | chr16      | ENSG00000103528 | 3'UTR           | c.*894 *902del          |
| 2968   | TAB1      | chr22      | ENSG00000100324 | Silent          | c.1398C>T               |
| 2969   | TAB3      | chrX       | ENSG00000157625 | Frame shift del | c.423del                |
| 2970   | TAF1B     | chr2       | ENSG00000115750 | Frame shift del | c.1411del               |
| 2971   | TAF1B     | chr2       | ENSG00000115750 | Frame shift del | c.1411del               |
| 2972   | TAF2      | chr8       | ENSG00000064313 | 3'UTR           | c.*645C>T               |
| 2973   | TAF2      | chr8       | ENSG00000064313 | Silent          | c.1401A>G               |
| 2974   | TAF6L     | chr11      | ENSG00000162227 | Nonsense        | c.313C>T                |
| 2975   | TAF6L     | chr11      | ENSG00000162227 | Missense        | c.1798A>G               |
| 2976   | TAF9B     | chrX       | ENSG00000187325 | 3'UTR           | c.*427del               |
| 2977   | TAGLN     | chr11      | ENSG00000149591 | 3'UTR           | c.*417 *419del          |
| 2978   | TANC1     | chr2       | ENSG00000115183 | 3'UTR           | c.*106del               |
| 2979   | TANC2     | chr17      | ENSG00000170921 | Missense        | c.3890G>A               |
| 2980   | TANK      | chr2       | ENSG00000136560 | Intron          | c.328-4256del           |
| 2981   | TAPT1     | chr4       | ENSG00000169762 | 3'UTR           | c.*881del               |
| 2982   | TARS      | chr5       | ENSG00000113407 | 3'UTR           | c.*370del               |
| 2983   | TARSL2    | chr15      | ENSG00000185418 | Intron          | c.1074+20del            |
| 2984   | TATDN2    | chr3       | ENSG00000157014 | Missense        | c.88T>A                 |
| 2985   | TAX1BP3   | chr17      | ENSG00000213977 | 3'UTR           | c.*317T>C               |
| 2986   | TBC1D12   | chr10      | ENSG00000108239 | 3'UTR           | c.*1555del              |
| 2987   | TBC1D14   | chr4       | ENSG00000132405 | 3'UTR           | c.*1020T>C              |
| 2988   | TBC1D22B  | chr6       | ENSG00000065491 | 3'UTR           | c.*363del               |
| 2989   | TBC1D5    | chr3       | ENSG00000131374 | Intron          | c.752+34del             |
| 2990   | TBC1D9B   | chr5       | ENSG00000197226 | Missense        | c.2570A>G               |
| 2991   | TBCCD1    | chr3       | ENSG00000113838 | 5'UTR           | c.-155A>G               |
| 2992   | TBCK      | chr4       | ENSG00000145348 | 3'UTR           | c.*1551del              |
| 2993   | TBKBP1    | chr17      | ENSG00000198933 | Missense        | c.890C>T                |
| 2994   | TBL1X     | chrX       | ENSG00000101849 | 3'UTR           | c.*3188del              |
| 2995   | TBL3      | chr16      | ENSG00000183751 | Missense        | c.1820G>A               |
| 2996   | TBX2      | chr17      | ENSG00000121068 | 3'Flank         |                         |
| 2997   | TCF19     | chr6       | ENSG00000137310 | 3'UTR           | c.*789A>G               |
| 2998   | TCF21     | chr6       | ENSG00000118526 | 3'UTR           | c.*1370A>G              |
| 2999   | TCF23     | chr2       | ENSG00000163792 | Splice site     | c.465+2T>C              |
| 3000   | TCF25     | chr16      | ENSG00000141002 | Missense        | c.1637T>C               |
| 3001   | TCF7      | chr5       | ENSG00000081059 | Frame shift Ins | c.463dup                |
| 3002   | TCF7L2    | chr10      | ENSG00000148737 | 3'UTR           | c.*860del               |
| 3003   | TCL1A     | chr14      | ENSG00000100721 | Intron          | c.121-386del            |
| 3004   | TCL1B     | chr14      | ENSG00000213231 | Intron          | c.*15+46T>C             |
| 3005   | TCTA      | chr3       | ENSG00000145022 | 3'UTR           | c.*662A>T               |
| 3006   | TDGF1P3   | chrX       | ENSG00000225366 | RNA             | n.397del                |
| 3007   | TDRD7     | chr9       | ENSG00000196116 | Intron          | c.1629+24A>G            |
| 3008   | TDRD7     | chr9       | ENSG00000196116 | Missense        | c.2488C>T               |
| 3009   | TEAD2     | chr19      | ENSG00000074219 | Frame shift del | c.883del                |
| 3010   | TEAD2     | chr19      | ENSG00000074219 | Frame shift del | c.883del                |
| 3011   | TEAD3     | chr6       | ENSG00000007866 | Missense        | c.253C>T                |
| 3012   | TENM3     | chr4       | ENSG00000218336 | Silent          | c.6A>G                  |
| 3013   | TENT5A    | chr6       | ENSG00000112773 | Frame shift del | c.517del                |
| 3014   | TERF2     | chr16      | ENSG00000132604 | 3'UTR           | c.*1056del              |
| 3015   | TESK2     | chr1       | ENSG00000070759 | 3'UTR           | c.*564T>C               |
| 3016   | TESK2     | chr1       | ENSG00000070759 | Missense        | c.1343C>T               |
| 3017   | TET1      | chr10      | ENSG00000138336 | Silent          | c.477A>G                |
| 3018   | TET2      | chr4       | ENSG00000168769 | Silent          | c.1548A>G               |
| 3019   | TET2      | chr4       | ENSG00000168769 | 3'UTR           | c.*4512 *4514del        |

| Number | Gene name | Chromosome | Gene_ID         | Mutation               | Nucleotide substitution |
|--------|-----------|------------|-----------------|------------------------|-------------------------|
| 3020   | TET3      | chr2       | ENSG00000187605 | Missense               | c.4412A>G               |
| 3021   | TFAP2B    | chr6       | ENSG00000008196 | 3'UTR                  | c.*135 *136inv          |
| 3022   | TFCP2L1   | chr2       | ENSG00000115112 | 3'UTR                  | c.*5599G>A              |
| 3023   | TFDP2     | chr3       | ENSG00000114126 | Intron                 | c.-203-777T>A           |
| 3024   | TFE3      | chrX       | ENSG00000068323 | 5'UTR                  | c.-79del                |
| 3025   | TFEC      | chr7       | ENSG00000105967 | Splice site            | c.382+2T>C              |
| 3026   | TFRC      | chr3       | ENSG00000072274 | Intron                 | c.1677+91C>A            |
| 3027   | TGFBI     | chr5       | ENSG00000120708 | 5'Flank                |                         |
| 3028   | TGFBR1    | chr9       | ENSG00000106799 | 3'UTR                  | c.*4804del              |
| 3029   | TGIF1     | chr18      | ENSG00000177426 | 3'UTR                  | c.*561del               |
| 3030   | TGIF2     | chr20      | ENSG00000118707 | 3'UTR                  | c.*730del               |
| 3031   | TGIF2     | chr20      | ENSG00000118707 | 3'UTR                  | c.*917G>T               |
| 3032   | TGIF2     | chr20      | ENSG00000118707 | 3'UTR                  | c.*2510del              |
| 3033   | TGM2      | chr20      | ENSG00000198959 | Missense               | c.1952G>A               |
| 3034   | TGM2      | chr20      | ENSG00000198959 | Missense               | c.1810G>A               |
| 3035   | TGM5      | chr15      | ENSG00000104055 | Missense               | c.1829T>A               |
| 3036   | THAP1     | chr8       | ENSG00000131931 | 3'UTR                  | c.*280del               |
| 3037   | THAP10    | chr15      | ENSG00000129028 | 3'UTR                  | c.*219del               |
| 3038   | THBS1     | chr15      | ENSG00000137801 | 3'UTR                  | c.*3429C>T              |
| 3039   | THBS1     | chr15      | ENSG00000137801 | 3'UTR                  | c.*3464del              |
| 3040   | THBS3     | chr1       | ENSG00000169231 | Nonsense               | c.778C>T                |
| 3041   | THEM5     | chr1       | ENSG00000196407 | Missense               | c.584C>A                |
| 3042   | THOC1     | chr18      | ENSG00000079134 | Missense               | c.268G>A                |
| 3043   | THOP1     | chr19      | ENSG00000172009 | 5'UTR                  | c.-5C>A                 |
| 3044   | THSD4     | chr15      | ENSG00000187720 | Missense               | c.256C>T                |
| 3045   | THUMPD1   | chr16      | ENSG00000066654 | Intron                 | c.407-356 407-355del    |
| 3046   | TIA1      | chr2       | ENSG00000116001 | 3'UTR                  | c.*1200G>T              |
| 3047   | TIA1      | chr2       | ENSG00000116001 | 3'UTR                  | c.*402del               |
| 3048   | TICAM1    | chr19      | ENSG00000127666 | Silent                 | c.1041G>A               |
| 3049   | TICRR     | chr15      | ENSG00000140534 | Missense               | c.5412G>T               |
| 3050   | TIGD6     | chr5       | ENSG00000164296 | Missense               | c.127A>G                |
| 3051   | TIMM44    | chr19      | ENSG00000104980 | Missense               | c.714C>A                |
| 3052   | TINAG     | chr6       | ENSG00000137251 | Translation Start Site | c.2T>C                  |
| 3053   | TIPARP    | chr3       | ENSG00000163659 | 3'UTR                  | c.*1596del              |
| 3054   | TIPIN     | chr15      | ENSG00000075131 | Intron                 | c.212+79del             |
| 3055   | TJAP1     | chr6       | ENSG00000137221 | Frame shift Ins        | c.1598dup               |
| 3056   | TJP2      | chr9       | ENSG00000119139 | Missense               | c.2065C>T               |
| 3057   | TKT       | chr3       | ENSG00000163931 | 3'UTR                  | c.*444A>G               |
| 3058   | TLCD5     | chr11      | ENSG00000181264 | 3'UTR                  | c.*2546del              |
| 3059   | TLK1      | chr2       | ENSG00000198586 | 3'UTR                  | c.*2747del              |
| 3060   | TLL1      | chr4       | ENSG00000038295 | Intron                 | c.169+45780A>G          |
| 3061   | TLN2      | chr15      | ENSG00000171914 | Intron                 | c.-36-9071G>C           |
| 3062   | TLN2      | chr15      | ENSG00000171914 | Missense               | c.676G>A                |
| 3063   | TLR2      | chr4       | ENSG00000137462 | 5'UTR                  | c.-827A>G               |
| 3064   | TM2D1     | chr1       | ENSG00000162604 | Intron                 | c.439+635A>G            |
| 3065   | TM9SF2    | chr13      | ENSG00000125304 | Intron                 | c.717-16del             |
| 3066   | TMCC1     | chr3       | ENSG00000172765 | Silent                 | c.1611C>T               |
| 3067   | TMCC3     | chr12      | ENSG00000057704 | 5'UTR                  | c.-5C>T                 |
| 3068   | TMCO4     | chr1       | ENSG00000162542 | Splice region          | c.383-3G>A              |
| 3069   | TMCO4     | chr1       | ENSG00000162542 | Missense               | c.89C>T                 |
| 3070   | TMED10    | chr14      | ENSG00000170348 | 3'UTR                  | c.*2315C>T              |
| 3071   | TMEFF1    | chr9       | ENSG00000241697 | Intron                 | c.464-28T>C             |
| 3072   | TMEFF2    | chr2       | ENSG00000144339 | 3'UTR                  | c.*1978del              |

| Number | Gene name | Chromosome | Gene_ID         | Mutation               | Nucleotide substitution |
|--------|-----------|------------|-----------------|------------------------|-------------------------|
| 3073   | TMEM123   | chr11      | ENSG00000152558 | 3'UTR                  | c.*1027A>G              |
| 3074   | TMEM127   | chr2       | ENSG00000135956 | 5'Flank                |                         |
| 3075   | TMEM135   | chr11      | ENSG00000166575 | Intron                 | c.551+54del             |
| 3076   | TMEM135   | chr11      | ENSG00000166575 | 3'UTR                  | c.*622del               |
| 3077   | TMEM145   | chr19      | ENSG00000167619 | Missense               | c.938C>T                |
| 3078   | TMEM145   | chr19      | ENSG00000167619 | 3'UTR                  | c.*13del                |
| 3079   | TMEM154   | chr4       | ENSG00000170006 | 3'UTR                  | c.*5267del              |
| 3080   | TMEM154   | chr4       | ENSG00000170006 | 3'UTR                  | c.*1551T>C              |
| 3081   | TMEM171   | chr5       | ENSG00000157111 | Missense               | c.91G>A                 |
| 3082   | TMEM18    | chr2       | ENSG00000151353 | 3'UTR                  | c.*1268 *1269del        |
| 3083   | TMEM184B  | chr22      | ENSG00000198792 | 3'UTR                  | c.*1940del              |
| 3084   | TMEM184B  | chr22      | ENSG00000198792 | 3'UTR                  | c.*1939T>A              |
| 3085   | TMEM192   | chr4       | ENSG00000170088 | 3'UTR                  | c.*1811del              |
| 3086   | TMEM199   | chr17      | ENSG00000244045 | 3'UTR                  | c.*2298A>G              |
| 3087   | TMEM201   | chr1       | ENSG00000188807 | Missense               | c.68C>T                 |
| 3088   | TMEM201   | chr1       | ENSG00000188807 | Intron                 | c.1903+14G>T            |
| 3089   | TMEM202   | chr15      | ENSG00000187806 | Silent                 | c.276C>T                |
| 3090   | TMEM214   | chr2       | ENSG00000119777 | Intron                 | c.637+51del             |
| 3091   | TMEM222   | chr1       | ENSG00000186501 | 3'UTR                  | c.*11del                |
| 3092   | TMEM245   | chr9       | ENSG00000106771 | 3'UTR                  | c.*1720del              |
| 3093   | TMEM247   | chr2       | ENSG00000284701 | Missense               | c.571A>G                |
| 3094   | TMEM259   | chr19      | ENSG00000182087 | Missense               | c.625T>C                |
| 3095   | TMEM26    | chr10      | ENSG00000196932 | Missense               | c.106T>C                |
| 3096   | TMEM35B   | chr1       | ENSG00000243749 | 3'UTR                  | c.*345del               |
| 3097   | TMEM38B   | chr9       | ENSG00000095209 | 3'UTR                  | c.*1418del              |
| 3098   | TMEM38B   | chr9       | ENSG00000095209 | 3'UTR                  | c.*2383del              |
| 3099   | TMEM51    | chr1       | ENSG00000171729 | 3'UTR                  | c.*537C>T               |
| 3100   | TMEM62    | chr15      | ENSG00000137842 | Intron                 | c.431-25T>A             |
| 3101   | TMEM62    | chr15      | ENSG00000137842 | Intron                 | c.1605+38C>T            |
| 3102   | TMEM64    | chr8       | ENSG00000180694 | 3'UTR                  | c.*82T>G                |
| 3103   | TMEM87B   | chr2       | ENSG00000153214 | 3'UTR                  | c.*1530del              |
| 3104   | TMEM8A    | chr16      | ENSG00000129925 | Splice region          | c.860+3A>G              |
| 3105   | TMEM94    | chr17      | ENSG00000177728 | Silent                 | c.3348G>A               |
| 3106   | TMEM9B    | chr11      | ENSG00000175348 | 3'UTR                  | c.*501A>G               |
| 3107   | TMPO      | chr12      | ENSG00000120802 | 3'UTR                  | c.*1661del              |
| 3108   | TMPRSS12  | chr12      | ENSG00000186452 | Missense               | c.316G>A                |
| 3109   | TMPRSS13  | chr11      | ENSG00000137747 | Intron                 | c.1524+11C>A            |
| 3110   | TMX2      | chr11      | ENSG00000213593 | Missense               | c.785A>G                |
| 3111   | TNFAIP1   | chr17      | ENSG00000109079 | 3'UTR                  | c.*708del               |
| 3112   | TNFAIP2   | chr14      | ENSG00000185215 | Missense               | c.1339C>A               |
| 3113   | TNFRSF10B | chr8       | ENSG00000120889 | Translation Start Site | c.2T>C                  |
| 3114   | TNFRSF11A | chr18      | ENSG00000141655 | 3'UTR                  | c.*197C>T               |
| 3115   | TNFRSF17  | chr16      | ENSG00000048462 | Silent                 | c.327T>C                |
| 3116   | TNFSF10   | chr3       | ENSG00000121858 | 5'UTR                  | c.-7C>T                 |
| 3117   | TNFSF4    | chr1       | ENSG00000117586 | 3'UTR                  | c.*784G>T               |
| 3118   | TNKS2     | chr10      | ENSG00000107854 | Intron                 | c.729-67T>C             |
| 3119   | TNN       | chr1       | ENSG00000120332 | Missense               | c.587A>G                |
| 3120   | TNNT2     | chr1       | ENSG00000118194 | Intron                 | c.97+537G>T             |
| 3121   | TNRC6A    | chr16      | ENSG00000090905 | Missense               | c.1339A>G               |
| 3122   | TNRC6A    | chr16      | ENSG00000090905 | 3'UTR                  | c.*833del               |
| 3123   | TNRC6B    | chr22      | ENSG00000100354 | 3'UTR                  | c.*4619del              |
| 3124   | TNS1      | chr2       | ENSG00000079308 | 3'UTR                  | c.*872C>T               |
| 3125   | TNS3      | chr7       | ENSG00000136205 | 3'UTR                  | c.*15C>A                |

| Number | Gene name | Chromosome | Gene_ID         | Mutation        | Nucleotide substitution |
|--------|-----------|------------|-----------------|-----------------|-------------------------|
| 3126   | TOMM20    | chr1       | ENSG00000173726 | 3'UTR           | c.*351del               |
| 3127   | TOMM40L   | chr1       | ENSG00000158882 | Missense        | c.80C>A                 |
| 3128   | TOMM40L   | chr1       | ENSG00000158882 | 3'UTR           | c.*1609T>C              |
| 3129   | TOP1      | chr20      | ENSG00000198900 | Splice region   | c.508-8C>T              |
| 3130   | TOP3A     | chr17      | ENSG00000177302 | Splice region   | c.391-7A>G              |
| 3131   | TOPBP1    | chr3       | ENSG00000163781 | Missense        | c.2875A>G               |
| 3132   | TOPBP1    | chr3       | ENSG00000163781 | Frame shift del | c.72del                 |
| 3133   | TOPBP1    | chr3       | ENSG00000163781 | Frame shift del | c.72del                 |
| 3134   | TOPORS    | chr9       | ENSG00000197579 | 3'UTR           | c.*638A>T               |
| 3135   | TOR1AIP1  | chr1       | ENSG00000143337 | 3'UTR           |                         |
| 3136   | TP53      | chr17      | ENSG00000141510 | Nonsense        | c.586C>T                |
| 3137   | TP53BP1   | chr15      | ENSG00000067369 | Silent          | c.3165C>A               |
| 3138   | TP53I3    | chr2       | ENSG00000115129 | 5'UTR           | c.-174G>T               |
| 3139   | TP53INP1  | chr8       | ENSG00000164938 | 3'UTR           | c.*1638T>C              |
| 3140   | TP63      | chr3       | ENSG00000073282 | Missense        | c.415G>A                |
| 3141   | TPD52     | chr8       | ENSG00000076554 | 5'UTR           | c.-153G>C               |
| 3142   | TPMT      | chr6       | ENSG00000137364 | Intron          | c.580+14del             |
| 3143   | TPRG1     | chr3       | ENSG00000188001 | 3'UTR           | c.*3871A>G              |
| 3144   | TPTE      | chr21      | ENSG00000274391 | Intron          | c.681+49G>A             |
| 3145   | TRAF1     | chr9       | ENSG00000056558 | 5'UTR           | c.-167T>C               |
| 3146   | TRAJ61    | chr14      | ENSG00000211831 | 3'Flank         |                         |
| 3147   | TRAK1     | chr3       | ENSG00000182606 | 3'UTR           | c.*1040del              |
| 3148   | TRANK1    | chr3       | ENSG00000168016 | Missense        | c.4930T>C               |
| 3149   | TRAPPC10  | chr21      | ENSG00000160218 | 3'UTR           | c.*315T>C               |
| 3150   | TRAPPC10  | chr21      | ENSG00000160218 | Frame shift del | c.858del                |
| 3151   | TRAPPC10  | chr21      | ENSG00000160218 | Frame shift del | c.858del                |
| 3152   | TRAPPC2   | chrX       | ENSG00000196459 | 3'UTR           | c.*594del               |
| 3153   | TRAPPC6B  | chr14      | ENSG00000182400 | 3'UTR           | c.*2331T>C              |
| 3154   | TRAPPC9   | chr8       | ENSG00000167632 | Intron          | c.3105-22465del         |
| 3155   | TRDN      | chr6       | ENSG00000186439 | 3'UTR           | c.*1112G>A              |
| 3156   | TRHDE     | chr12      | ENSG00000072657 | Missense        | c.2309G>A               |
| 3157   | TRHDE     | chr12      | ENSG00000072657 | 3'UTR           | c.*2347del              |
| 3158   | TRIM13    | chr13      | ENSG00000204977 | Intron          | c.-218+503del           |
| 3159   | TRIM14    | chr9       | ENSG00000106785 | Missense        | c.1022A>G               |
| 3160   | TRIM2     | chr4       | ENSG00000109654 | 3'UTR           | c.*3998 *3999del        |
| 3161   | TRIM38    | chr6       | ENSG00000112343 | 3'UTR           | c.*1166del              |
| 3162   | TRIM54    | chr2       | ENSG00000138100 | Intron          | c.513+41del             |
| 3163   | TRIP11    | chr14      | ENSG00000100815 | 3'UTR           | c.*1339del              |
| 3164   | TRIP13    | chr5       | ENSG00000071539 | 3'UTR           | c.*527del               |
| 3165   | TRIQK     | chr8       | ENSG00000205133 | 3'UTR           | c.*338T>C               |
| 3166   | TRIQK     | chr8       | ENSG00000205133 | 3'UTR           | c.*261G>T               |
| 3167   | TRMO      | chr9       | ENSG00000136932 | Intron          | c.73+75G>T              |
| 3168   | TRMT10B   | chr9       | ENSG00000165275 | Intron          | c.652+88 652+90del      |
| 3169   | TRMT11    | chr6       | ENSG00000066651 | Intron          | c.522+41dup             |
| 3170   | TRMT44    | chr4       | ENSG00000155275 | Missense        | c.133G>C                |
| 3171   | TRMT61A   | chr14      | ENSG00000166166 | 3'UTR           | c.*819C>G               |
| 3172   | TRNAU1AP  | chr1       | ENSG00000180098 | Missense        | c.23G>T                 |
| 3173   | TROAP     | chr12      | ENSG00000135451 | Frame shift Ins | c.2054dup               |
| 3174   | TRPM2     | chr21      | ENSG00000142185 | Silent          | c.2991G>A               |
| 3175   | TRPM3     | chr9       | ENSG00000083067 | 3'UTR           | c.*867A>G               |
| 3176   | TRPM6     | chr9       | ENSG00000119121 | Missense        | c.5540T>A               |
| 3177   | TRPM7     | chr15      | ENSG00000092439 | 5'UTR           | c.-138T>C               |
| 3178   | TRPS1     | chr8       | ENSG00000104447 | 3'UTR           | c.*1843del              |

| Number | Gene name | Chromosome | Gene_ID         | Mutation            | Nucleotide substitution |
|--------|-----------|------------|-----------------|---------------------|-------------------------|
| 3179   | TRPS1     | chr8       | ENSG00000104447 | 3'UTR               | c.*1504T>C              |
| 3180   | TRPV1     | chr17      | ENSG00000196689 | Missense            | c.863T>C                |
| 3181   | TRPV6     | chr7       | ENSG00000165125 | Silent              | c.1098G>A               |
| 3182   | TSC1      | chr9       | ENSG00000165699 | 3'UTR               | c.*988C>A               |
| 3183   | TSGA10P   | chr11      | ENSG00000175513 | Translation Start S | c.1A>G                  |
| 3184   | TSHZ2     | chr20      | ENSG00000182463 | 5'UTR               | c.-458del               |
| 3185   | TSPAN13   | chr7       | ENSG00000106537 | 3'UTR               | c.*631A>G               |
| 3186   | TSPAN14   | chr10      | ENSG00000108219 | 3'UTR               | c.*4067T>C              |
| 3187   | TSPAN16   | chr19      | ENSG00000130167 | Splice site         | c.69+2del               |
| 3188   | TSPAN17   | chr5       | ENSG00000048140 | Missense            | c.493G>C                |
| 3189   | TSPAN9    | chr12      | ENSG00000011105 | Splice site         | c.565-2A>G              |
| 3190   | TSPEAR    | chr21      | ENSG00000175894 | Intron              | c.82+11G>A              |
| 3191   | TSSK6     | chr19      | ENSG00000178093 | Silent              | c.537A>G                |
| 3192   | TTC13     | chr1       | ENSG00000143643 | Missense            | c.1319A>G               |
| 3193   | TTC26     | chr7       | ENSG00000105948 | Intron              | c.257-40T>C             |
| 3194   | TTC28     | chr22      | ENSG00000100154 | 3'UTR               | c.*1869C>T              |
| 3195   | TTC30A    | chr2       | ENSG00000197557 | Missense            | c.1918C>T               |
| 3196   | TTF1      | chr9       | ENSG00000125482 | Intron              | c.1857-72T>A            |
| 3197   | TTLL7     | chr1       | ENSG00000137941 | Missense            | c.2287T>G               |
| 3198   | TTYH3     | chr7       | ENSG00000136295 | 3'UTR               | c.*978del               |
| 3199   | TUBA1B    | chr12      | ENSG00000123416 | 3'Flank             |                         |
| 3200   | TUBGCP3   | chr13      | ENSG00000126216 | Splice site         | c.1555+2T>C             |
| 3201   | TULP3     | chr12      | ENSG00000078246 | Intron              | c.41+126A>G             |
| 3202   | TULP3     | chr12      | ENSG00000078246 | 3'UTR               | c.*894A>G               |
| 3203   | TXLNA     | chr1       | ENSG00000084652 | Frame shift Ins     | c.1204dup               |
| 3204   | TXNL4B    | chr16      | ENSG00000140830 | Intron              | c.132+342del            |
| 3205   | TYW1      | chr7       | ENSG00000198874 | 5'UTR               | c.-124C>A               |
| 3206   | TYW1      | chr7       | ENSG00000198874 | Splice site         | c.984+2T>C              |
| 3207   | TYW1      | chr7       | ENSG00000198874 | 3'UTR               | c.*101A>G               |
| 3208   | UBA6      | chr4       | ENSG00000033178 | 3'UTR               | c.*2837del              |
| 3209   | UBA6      | chr4       | ENSG00000033178 | 3'UTR               | c.*911del               |
| 3210   | UBA6      | chr4       | ENSG00000033178 | Intron              | c.897+37del             |
| 3211   | UBALD1    | chr16      | ENSG00000153443 | 5'UTR               | c.-60A>G                |
| 3212   | UBE2A     | chrX       | ENSG00000077721 | 3'UTR               | c.*1122del              |
| 3213   | UBE2C     | chr20      | ENSG00000175063 | Splice region       | c.217-2del              |
| 3214   | UBE2E1    | chr3       | ENSG00000170142 | Intron              | c.203+58T>G             |
| 3215   | UBE2F     | chr2       | ENSG00000184182 | Intron              | c.214+8566C>T           |
| 3216   | UBE2G2    | chr21      | ENSG00000184787 | 3'UTR               | c.*1110T>A              |
| 3217   | UBE2H     | chr7       | ENSG00000186591 | 5'UTR               | c.-1T>A                 |
| 3218   | UBE2J1    | chr6       | ENSG00000198833 | Intron              | c.105+87A>G             |
| 3219   | UBE2L3    | chr22      | ENSG00000185651 | 3'UTR               | c.*545A>G               |
| 3220   | UBE2V2    | chr8       | ENSG00000169139 | 5'UTR               | c.-899T>C               |
| 3221   | UBE3B     | chr12      | ENSG00000151148 | Intron              | c.2077-1380A>G          |
| 3222   | UBE4A     | chr11      | ENSG00000110344 | Intron              | c.562-13A>G             |
| 3223   | UBFD1     | chr16      | ENSG00000103353 | 3'UTR               | c.*454del               |
| 3224   | UBP1      | chr3       | ENSG00000153560 | Intron              | c.448+42T>C             |
| 3225   | UBQLN4    | chr1       | ENSG00000160803 | Missense            | c.34C>T                 |
| 3226   | UBR4      | chr1       | ENSG00000127481 | Intron              | c.3900-24T>A            |
| 3227   | UBR5      | chr8       | ENSG00000104517 | Missense            | c.4193T>C               |
| 3228   | UBXN10    | chr1       | ENSG00000162543 | 3'UTR               | c.*1508T>C              |
| 3229   | UBXN2A    | chr2       | ENSG00000173960 | 3'UTR               | c.*1594T>A              |
| 3230   | UBXN2A    | chr2       | ENSG00000173960 | 3'UTR               | c.*2104del              |
| 3231   | UBXN2A    | chr2       | ENSG00000173960 | 3'UTR               | c.*3489A>G              |

| Number | Gene name | Chromosome | Gene_ID         | Mutation        | Nucleotide substitution |
|--------|-----------|------------|-----------------|-----------------|-------------------------|
| 3232   | UFC1      | chr1       | ENSG00000143222 | 5'Flank         |                         |
| 3233   | UGCG      | chr9       | ENSG00000148154 | 3'UTR           | c.*835C>T               |
| 3234   | UGDH      | chr4       | ENSG00000109814 | Intron          | c.1263+63A>T            |
| 3235   | UHMK1     | chr1       | ENSG00000152332 | Intron          | c.754-4del              |
| 3236   | UHRF1     | chr19      | ENSG00000276043 | Silent          | c.390G>A                |
| 3237   | ULBP1     | chr6       | ENSG00000111981 | Missense        | c.152A>G                |
| 3238   | UMODL1    | chr21      | ENSG00000177398 | Missense        | c.451G>A                |
| 3239   | UNC13B    | chr9       | ENSG00000198722 | Missense        | c.2675C>T               |
| 3240   | UNC5B     | chr10      | ENSG00000107731 | Missense        | c.727G>A                |
| 3241   | UNC5D     | chr8       | ENSG00000156687 | Silent          | c.177G>A                |
| 3242   | UNCX      | chr7       | ENSG00000164853 | Missense        | c.527A>G                |
| 3243   | Unknown   | chr13      |                 | IGR             |                         |
| 3244   | Unknown   | chr20      |                 | IGR             |                         |
| 3245   | Unknown   | chr1       |                 | IGR             |                         |
| 3246   | Unknown   | chr1       |                 | IGR             |                         |
| 3247   | UQCC3     | chr11      | ENSG00000204922 | 3'UTR           | c.*122dup               |
| 3248   | UQCRB     | chr8       | ENSG00000156467 | 3'UTR           | c.*434del               |
| 3249   | UQCRC2    | chr16      | ENSG00000140740 | Missense        | c.929A>G                |
| 3250   | UQCRHL    | chr1       | ENSG00000233954 | Missense        | c.146G>A                |
| 3251   | USH2A     | chr1       | ENSG00000042781 | Missense        | c.1247C>T               |
| 3252   | USP14     | chr18      | ENSG00000101557 | Missense        | c.265G>A                |
| 3253   | USP15     | chr12      | ENSG00000135655 | Frame shift del | c.454del                |
| 3254   | USP18     | chr22      | ENSG00000184979 | Missense        | c.355C>T                |
| 3255   | USP19     | chr3       | ENSG00000172046 | Missense        | c.2045T>C               |
| 3256   | USP2      | chr11      | ENSG00000036672 | 3'UTR           | c.*787del               |
| 3257   | USP24     | chr1       | ENSG00000162402 | Missense        | c.4432T>C               |
| 3258   | USP34     | chr2       | ENSG00000115464 | Intron          | c.44-1180T>C            |
| 3259   | USP35     | chr11      | ENSG00000118369 | 3'UTR           | c.*565del               |
| 3260   | USP36     | chr17      | ENSG00000055483 | Missense        | c.812T>C                |
| 3261   | USP40     | chr2       | ENSG00000085982 | Intron          | c.2648-25del            |
| 3262   | USP47     | chr11      | ENSG00000170242 | Intron          | c.3559-17A>T            |
| 3263   | USP48     | chr1       | ENSG00000090686 | 3'UTR           | c.*45dup                |
| 3264   | USP8      | chr15      | ENSG00000138592 | 3'UTR           | c.*618del               |
| 3265   | USPL1     | chr13      | ENSG00000132952 | Intron          | c.1113-5del             |
| 3266   | UST       | chr6       | ENSG00000111962 | Missense        | c.479A>C                |
| 3267   | UTP18     | chr17      | ENSG00000011260 | Intron          | c.455+35T>C             |
| 3268   | UTP20     | chr12      | ENSG00000120800 | 5'UTR           | c.-155A>G               |
| 3269   | UTP4      | chr16      | ENSG00000141076 | Splice region   | c.-2-4del               |
| 3270   | UTP6      | chr17      | ENSG00000108651 | Intron          | c.621+40T>C             |
| 3271   | UTS2R     | chr17      | ENSG00000181408 | 5'UTR           | c.-24T>C                |
| 3272   | VAMP1     | chr12      | ENSG00000139190 | Frame shift del | c.351del                |
| 3273   | VAMP4     | chr1       | ENSG00000117533 | 3'UTR           | c.*1501del              |
| 3274   | VANGL1    | chr1       | ENSG00000173218 | Frame shift del | c.515del                |
| 3275   | VANGL1    | chr1       | ENSG00000173218 | Frame shift del | c.515del                |
| 3276   | VASP      | chr19      | ENSG00000125753 | Missense        | c.92A>T                 |
| 3277   | VAV1      | chr19      | ENSG00000141968 | Intron          | c.928-69T>G             |
| 3278   | VCP       | chr9       | ENSG00000165280 | Intron          | c.2315+32A>G            |
| 3279   | VDAC2     | chr10      | ENSG00000165637 | 5'UTR           | c.-64T>G                |
| 3280   | VGLL2     | chr6       | ENSG00000170162 | Missense        | c.920G>A                |
| 3281   | VGLL4     | chr3       | ENSG00000144560 | 3'UTR           | c.*1941del              |
| 3282   | VIPR1     | chr3       | ENSG00000114812 | 3'UTR           | c.*169del               |
| 3283   | VIRMA     | chr8       | ENSG00000164944 | Silent          | c.4281A>G               |
| 3284   | VIT       | chr2       | ENSG00000205221 | 3'UTR           | c.*294T>G               |

| Number | Gene name | Chromosome | Gene_ID         | Mutation        | Nucleotide substitution    |
|--------|-----------|------------|-----------------|-----------------|----------------------------|
| 3285   | VMA21     | chrX       | ENSG00000160131 | 3'UTR           | c.*4291del                 |
| 3286   | VPS13A    | chr9       | ENSG00000197969 | Missense        | c.5705C>A                  |
| 3287   | VPS13A    | chr9       | ENSG00000197969 | Intron          | c.6379-22 6379-21del       |
| 3288   | VPS13A    | chr9       | ENSG00000197969 | 3'UTR           | c.*3675A>T                 |
| 3289   | VPS13C    | chr15      | ENSG00000129003 | 3'UTR           | c.*308A>G                  |
| 3290   | VPS13D    | chr1       | ENSG00000048707 | Intron          | c.7274-10dup               |
| 3291   | VPS13D    | chr1       | ENSG00000048707 | Intron          | c.8495+28del               |
| 3292   | VPS26B    | chr11      | ENSG00000151502 | 3'UTR           | c.*766C>T                  |
| 3293   | VPS35L    | chr16      | ENSG00000103544 | Intron          | c.701-666del               |
| 3294   | VPS37B    | chr12      | ENSG00000139722 | 5'UTR           | c.-1102 -1099del           |
| 3295   | VPS41     | chr7       | ENSG00000006715 | 3'UTR           | c.*1142A>G                 |
| 3296   | VPS41     | chr7       | ENSG00000006715 | 3'UTR           | c.*824A>G                  |
| 3297   | VPS8      | chr3       | ENSG00000156931 | Missense        | c.1364T>C                  |
| 3298   | VPS8      | chr3       | ENSG00000156931 | Nonsense        | c.2683C>T                  |
| 3299   | VPS8      | chr3       | ENSG00000156931 | Intron          | c.3586-9del                |
| 3300   | VPS9D1    | chr16      | ENSG00000075399 | Intron          | c.1697+19A>G               |
| 3301   | VRK2      | chr2       | ENSG00000028116 | Frame shift del | c.1089del                  |
| 3302   | VRTN      | chr14      | ENSG00000133980 | 3'UTR           | c.*639del                  |
| 3303   | VSIG10    | chr12      | ENSG00000176834 | Missense        | c.752A>G                   |
| 3304   | VSIG10    | chr12      | ENSG00000176834 | Frame shift del | c.671del                   |
| 3305   | VSTM5     | chr11      | ENSG00000214376 | 3'UTR           | c.*2300del                 |
| 3306   | VTI1B     | chr14      | ENSG00000100568 | 3'UTR           | c.*1126A>C                 |
| 3307   | VWA1      | chr1       | ENSG00000179403 | 3'UTR           | c.*1623del                 |
| 3308   | VWC2      | chr7       | ENSG00000188730 | Intron          | c.827-36C>T                |
| 3309   | VWC2L     | chr2       | ENSG00000174453 | 3'UTR           | c.*473del                  |
| 3310   | VWDE      | chr7       | ENSG00000146530 | Missense        | c.2081T>C                  |
| 3311   | VXN       | chr8       | ENSG00000169085 | Missense        | c.236C>T                   |
| 3312   | VXN       | chr8       | ENSG00000169085 | 3'UTR           | c.*1254A>G                 |
| 3313   | WBP1      | chr2       | ENSG00000239779 | Frame shift del | c.552del                   |
| 3314   | WBP1      | chr2       | ENSG00000239779 | Frame shift del | c.552del                   |
| 3315   | WDCP      | chr2       | ENSG00000163026 | Intron          | c.1819-219T>C              |
| 3316   | WDFY2     | chr13      | ENSG00000139668 | Missense        | c.1103A>G                  |
| 3317   | WDFY3     | chr4       | ENSG00000163625 | Silent          | c.1749T>G                  |
| 3318   | WDHD1     | chr14      | ENSG00000198554 | Intron          | c.1153+29A>G               |
| 3319   | WDPCP     | chr2       | ENSG00000143951 | Intron          | c.1915+29414 1915+29415del |
| 3320   | WDR1      | chr4       | ENSG00000071127 | 3'UTR           | c.*630del                  |
| 3321   | WDR12     | chr2       | ENSG00000138442 | 5'UTR           | c.-599del                  |
| 3322   | WDR18     | chr19      | ENSG00000065268 | Missense        | c.402T>C                   |
| 3323   | WDR20     | chr14      | ENSG00000140153 | 3'UTR           | c.*1695G>A                 |
| 3324   | WDR24     | chr16      | ENSG00000127580 | Missense        | c.2444A>G                  |
| 3325   | WDR36     | chr5       | ENSG00000134987 | 3'UTR           | c.*1802A>G                 |
| 3326   | WDR41     | chr5       | ENSG00000164253 | Frame shift del | c.1101del                  |
| 3327   | WDR41     | chr5       | ENSG00000164253 | Frame shift del | c.1101del                  |
| 3328   | WDR44     | chrX       | ENSG00000131725 | Intron          | c.2648-1846 2648-1845del   |
| 3329   | WDR44     | chrX       | ENSG00000131725 | 3'UTR           | c.*418del                  |
| 3330   | WDR55     | chr5       | ENSG00000120314 | Frame shift del | c.1022del                  |
| 3331   | WDR60     | chr7       | ENSG00000126870 | 3'UTR           | c.*235G>A                  |
| 3332   | WDR7      | chr18      | ENSG00000091157 | 3'UTR           | c.*3229G>A                 |
| 3333   | WDR70     | chr5       | ENSG00000082068 | 5'Flank         |                            |
| 3334   | WDR70     | chr5       | ENSG00000082068 | 3'UTR           | c.*274A>G                  |
| 3335   | WDR73     | chr15      | ENSG00000177082 | 3'Flank         |                            |
| 3336   | WDR81     | chr17      | ENSG00000167716 | Missense        | c.2476C>A                  |
| 3337   | WDR83     | chr19      | ENSG00000123154 | Missense        | c.635A>G                   |

| Number | Gene name | Chromosome | Gene_ID         | Mutation        | Nucleotide substitution |
|--------|-----------|------------|-----------------|-----------------|-------------------------|
| 3338   | WDR87     | chr19      | ENSG00000171804 | Frame shift del | c.6187del               |
| 3339   | WDR90     | chr16      | ENSG00000161996 | Silent          | c.3594C>T               |
| 3340   | WIF1      | chr12      | ENSG00000156076 | Intron          | c.288+18T>C             |
| 3341   | WIPF3     | chr7       | ENSG00000122574 | Frame shift del | c.23del                 |
| 3342   | WIPI2     | chr7       | ENSG00000157954 | Missense        | c.521C>A                |
| 3343   | WNK1      | chr12      | ENSG00000060237 | Intron          | c.5584-6del             |
| 3344   | WNK2      | chr9       | ENSG00000165238 | 3'UTR           | c.*120del               |
| 3345   | WRAP53    | chr17      | ENSG00000141499 | Frame shift del | c.1565del               |
| 3346   | WRAP53    | chr17      | ENSG00000141499 | Frame shift del | c.1565del               |
| 3347   | WRN       | chr8       | ENSG00000165392 | 3'UTR           | c.*537A>G               |
| 3348   | WTAP      | chr6       | ENSG00000146457 | Splice region   | c.607+6G>T              |
| 3349   | WTAP      | chr6       | ENSG00000146457 | 3'UTR           | c.*103T>C               |
| 3350   | WWC2      | chr4       | ENSG00000151718 | 3'UTR           | c.*1455del              |
| 3351   | XDH       | chr2       | ENSG00000158125 | Missense        | c.3526C>T               |
| 3352   | XIAP      | chrX       | ENSG00000101966 | Missense        | c.695G>A                |
| 3353   | XIAP      | chrX       | ENSG00000101966 | 3'UTR           | c.*5505 *5506del        |
| 3354   | XIAP      | chrX       | ENSG00000101966 | 3'UTR           | c.*5507T>A              |
| 3355   | XIST      | chrX       | ENSG00000229807 | RNA             | n.2319T>C               |
| 3356   | XK        | chrX       | ENSG00000047597 | 3'UTR           | c.*1500A>G              |
| 3357   | XKR6      | chr8       | ENSG00000171044 | 3'UTR           | c.*359del               |
| 3358   | XPA       | chr9       | ENSG00000136936 | 3'UTR           | c.*134A>G               |
| 3359   | XPNPEP1   | chr10      | ENSG00000108039 | Missense        | c.125G>A                |
| 3360   | XPOT      | chr12      | ENSG00000184575 | 3'UTR           | c.*517del               |
| 3361   | XRCC2     | chr7       | ENSG00000196584 | 3'UTR           | c.*1812del              |
| 3362   | XYLB      | chr3       | ENSG00000093217 | 3'UTR           | c.*584T>C               |
| 3363   | YAF2      | chr12      | ENSG00000015153 | 3'UTR           | c.*858A>G               |
| 3364   | YARS2     | chr12      | ENSG00000139131 | Intron          | c.947+1009C>T           |
| 3365   | YBX1      | chr1       | ENSG00000065978 | Missense        | c.217C>T                |
| 3366   | YEATS2    | chr3       | ENSG00000163872 | Intron          | c.3583-4del             |
| 3367   | YKT6      | chr7       | ENSG00000106636 | Intron          | c.460-180T>C            |
| 3368   | YWHAZ     | chr8       | ENSG00000164924 | Intron          | c.-11-12del             |
| 3369   | ZBED1     | chrX       | ENSG00000214717 | 5'UTR           | c.-230dup               |
| 3370   | ZBTB10    | chr8       | ENSG00000205189 | Nonsense        | c.490C>T                |
| 3371   | ZBTB21    | chr21      | ENSG00000173276 | Missense        | c.2317A>G               |
| 3372   | ZBTB21    | chr21      | ENSG00000173276 | Silent          | c.555T>C                |
| 3373   | ZBTB34    | chr9       | ENSG00000177125 | Missense        | c.403G>A                |
| 3374   | ZBTB37    | chr1       | ENSG00000185278 | 5'Flank         |                         |
| 3375   | ZBTB4     | chr17      | ENSG00000174282 | Frame shift del | c.1479del               |
| 3376   | ZBTB4     | chr17      | ENSG00000174282 | Frame shift del | c.1479del               |
| 3377   | ZBTB40    | chr1       | ENSG00000184677 | 3'UTR           | c.*2013T>C              |
| 3378   | ZBTB44    | chr11      | ENSG00000196323 | 3'UTR           | c.*4923del              |
| 3379   | ZBTB44    | chr11      | ENSG00000196323 | 3'UTR           | c.*1247del              |
| 3380   | ZC3H18    | chr16      | ENSG00000158545 | Frame shift Ins | c.2037dup               |
| 3381   | ZCCHC7    | chr9       | ENSG00000147905 | 3'UTR           | c.*328del               |
| 3382   | ZCCHC7    | chr9       | ENSG00000147905 | Missense        | c.1376A>C               |
| 3383   | ZCWPW2    | chr3       | ENSG00000206559 | Frame shift del | c.392del                |
| 3384   | ZDHHC18   | chr1       | ENSG00000204160 | Intron          | c.532-27T>C             |
| 3385   | ZDHHC3    | chr3       | ENSG00000163812 | 3'UTR           | c.*2381C>A              |
| 3386   | ZEB2      | chr2       | ENSG00000169554 | 3'UTR           | c.*560del               |
| 3387   | ZFAND5    | chr9       | ENSG00000107372 | 3'UTR           | c.*4359 *4360insGT      |
| 3388   | ZFAND5    | chr9       | ENSG00000107372 | 3'UTR           | c.*2222G>T              |
| 3389   | ZFHX4     | chr8       | ENSG00000091656 | Frame shift del | c.4248del               |
| 3390   | ZFP1      | chr16      | ENSG00000184517 | 3'UTR           | c.*1698dup              |



| Number | Gene name | Chromosome | Gene_ID         | Mutation        | Nucleotide substitution |
|--------|-----------|------------|-----------------|-----------------|-------------------------|
| 3391   | ZFP14     | chr19      | ENSG00000142065 | Missense        | c.1232T>A               |
| 3392   | ZFP28     | chr19      | ENSG00000196867 | Missense        | c.2279G>A               |
| 3393   | ZFP36L2   | chr2       | ENSG00000152518 | 3'UTR           | c.*1544del              |
| 3394   | ZFPM2     | chr8       | ENSG00000169946 | RNA             | n.264A>G                |
| 3395   | ZFR       | chr5       | ENSG00000056097 | Intron          | c.2948-50del            |
| 3396   | ZFYVE9    | chr1       | ENSG00000157077 | Silent          | c.2421A>G               |
| 3397   | ZGLP1     | chr19      | ENSG00000220201 | Missense        | c.130C>T                |
| 3398   | ZGRF1     | chr4       | ENSG00000138658 | 3'UTR           | c.*175del               |
| 3399   | ZGRF1     | chr4       | ENSG00000138658 | Intron          | c.102+1904del           |
| 3400   | ZHX1      | chr8       | ENSG00000165156 | Frame shift del | c.1692del               |
| 3401   | ZHX1      | chr8       | ENSG00000165156 | Frame shift del | c.1692del               |
| 3402   | ZKSCAN1   | chr7       | ENSG00000106261 | 3'UTR           | c.*1233del              |
| 3403   | ZKSCAN8   | chr6       | ENSG00000198315 | 3'UTR           | c.*1150A>G              |
| 3404   | ZMAT3     | chr3       | ENSG00000172667 | 3'UTR           | c.*6568del              |
| 3405   | ZMAT3     | chr3       | ENSG00000172667 | 3'UTR           | c.*6353del              |
| 3406   | ZMYM3     | chrX       | ENSG00000147130 | Frame shift del | c.143del                |
| 3407   | ZMYM3     | chrX       | ENSG00000147130 | Frame shift del | c.143del                |
| 3408   | ZMYM4     | chr1       | ENSG00000146463 | Intron          | c.840+20del             |
| 3409   | ZMYM6     | chr1       | ENSG00000163867 | Intron          | c.2147-27T>C            |
| 3410   | ZMYM6     | chr1       | ENSG00000163867 | Missense        | c.1205G>A               |
| 3411   | ZMYM6     | chr1       | ENSG00000163867 | Missense        | c.655G>A                |
| 3412   | ZMYND12   | chr1       | ENSG00000066185 | Splice region   | c.110+6C>T              |
| 3413   | ZMYND8    | chr20      | ENSG00000101040 | 3'UTR           | c.*332del               |
| 3414   | ZMYND8    | chr20      | ENSG00000101040 | Silent          | c.2634T>C               |
| 3415   | ZNF131    | chr5       | ENSG00000172262 | 5'UTR           | c.-94del                |
| 3416   | ZNF157    | chrX       | ENSG00000147117 | 3'UTR           | c.*321del               |
| 3417   | ZNF175    | chr19      | ENSG00000105497 | 3'UTR           | c.*83A>G                |
| 3418   | ZNF204P   | chr6       | ENSG00000204789 | RNA             | n.550T>C                |
| 3419   | ZNF207    | chr17      | ENSG00000010244 | 3'UTR           | c.*11937del             |
| 3420   | ZNF211    | chr19      | ENSG00000121417 | 5'UTR           | c.-62C>T                |
| 3421   | ZNF213    | chr16      | ENSG00000085644 | Missense        | c.701A>G                |
| 3422   | ZNF236    | chr18      | ENSG00000130856 | Missense        | c.781G>A                |
| 3423   | ZNF250    | chr8       | ENSG00000196150 | 3'UTR           | c.*3983del              |
| 3424   | ZNF286A   | chr17      | ENSG00000187607 | 3'UTR           | c.*3139del              |
| 3425   | ZNF292    | chr6       | ENSG00000188994 | 3'UTR           | c.*462A>G               |
| 3426   | ZNF331    | chr19      | ENSG00000130844 | 3'UTR           | c.*1401T>A              |
| 3427   | ZNF331    | chr19      | ENSG00000130844 | 3'UTR           | c.*1407G>C              |
| 3428   | ZNF354A   | chr5       | ENSG00000169131 | 5'UTR           | c.-150C>T               |
| 3429   | ZNF365    | chr10      | ENSG00000138311 | 3'UTR           | c.*1900del              |
| 3430   | ZNF391    | chr6       | ENSG00000124613 | 3'UTR           | c.*1849C>A              |
| 3431   | ZNF410    | chr14      | ENSG00000119725 | 5'UTR           | c.-233del               |
| 3432   | ZNF420    | chr19      | ENSG00000197050 | 3'UTR           | c.*661_*662del          |
| 3433   | ZNF420    | chr19      | ENSG00000197050 | 3'UTR           | c.*702del               |
| 3434   | ZNF436    | chr1       | ENSG00000125945 | 3'UTR           | c.*1361T>C              |
| 3435   | ZNF438    | chr10      | ENSG00000183621 | Silent          | c.1275C>T               |
| 3436   | ZNF438    | chr10      | ENSG00000183621 | Missense        | c.4G>T                  |
| 3437   | ZNF445    | chr3       | ENSG00000185219 | 3'UTR           | c.*2818_*2819del        |
| 3438   | ZNF462    | chr9       | ENSG00000148143 | 3'UTR           | c.*2101del              |
| 3439   | ZNF469    | chr16      | ENSG00000225614 | Missense        | c.2114T>C               |
| 3440   | ZNF488    | chr10      | ENSG00000265763 | Silent          | c.861G>A                |
| 3441   | ZNF500    | chr16      | ENSG00000103199 | Missense        | c.131C>A                |
| 3442   | ZNF502    | chr3       | ENSG00000196653 | 3'UTR           | c.*1295_*1298del        |
| 3443   | ZNF512    | chr2       | ENSG00000243943 | 5'Flank         |                         |

| Number | Gene name | Chromosome | Gene_ID         | Mutation        | Nucleotide substitution |
|--------|-----------|------------|-----------------|-----------------|-------------------------|
| 3444   | ZNF513    | chr2       | ENSG00000163795 | Silent          | c.780G>A                |
| 3445   | ZNF516    | chr18      | ENSG00000101493 | 3'UTR           | c.*4006G>A              |
| 3446   | ZNF516    | chr18      | ENSG00000101493 | 3'UTR           | c.*469C>T               |
| 3447   | ZNF527    | chr19      | ENSG00000189164 | 3'UTR           | c.*644G>A               |
| 3448   | ZNF548    | chr19      | ENSG00000188785 | 5'UTR           | c.-91A>G                |
| 3449   | ZNF572    | chr8       | ENSG00000180938 | 3'UTR           | c.*1448T>C              |
| 3450   | ZNF575    | chr19      | ENSG00000176472 | Intron          | c.136-5del              |
| 3451   | ZNF576    | chr19      | ENSG00000124444 | 3'UTR           | c.*766A>G               |
| 3452   | ZNF583    | chr19      | ENSG00000198440 | 3'UTR           | c.*2693T>C              |
| 3453   | ZNF587    | chr19      | ENSG00000198466 | Splice region   | c.33+5T>G               |
| 3454   | ZNF606    | chr19      | ENSG00000166704 | Intron          | c.32-32T>C              |
| 3455   | ZNF610    | chr19      | ENSG00000167554 | Intron          | c.190+12T>C             |
| 3456   | ZNF611    | chr19      | ENSG00000213020 | Missense        | c.1460G>A               |
| 3457   | ZNF621    | chr3       | ENSG00000172888 | 3'UTR           | c.*851del               |
| 3458   | ZNF628    | chr19      | ENSG00000197483 | Missense        | c.2057C>T               |
| 3459   | ZNF639    | chr3       | ENSG00000121864 | 3'UTR           | c.*508T>C               |
| 3460   | ZNF652    | chr17      | ENSG00000198740 | 3'UTR           | c.*3076del              |
| 3461   | ZNF655    | chr7       | ENSG00000197343 | Intron          | c.137-933G>A            |
| 3462   | ZNF664    | chr12      | ENSG00000179195 | 3'UTR           | c.*1339G>A              |
| 3463   | ZNF682    | chr19      | ENSG00000197124 | Silent          | c.492T>C                |
| 3464   | ZNF697    | chr1       | ENSG00000143067 | Silent          | c.1497C>T               |
| 3465   | ZNF697    | chr1       | ENSG00000143067 | Missense        | c.1043C>T               |
| 3466   | ZNF7      | chr8       | ENSG00000147789 | Missense        | c.128T>C                |
| 3467   | ZNF704    | chr8       | ENSG00000164684 | 3'UTR           | c.*11958del             |
| 3468   | ZNF708    | chr19      | ENSG00000182141 | Intron          | c.4-15 4-14del          |
| 3469   | ZNF711    | chrX       | ENSG00000147180 | Intron          | c.917-859dup            |
| 3470   | ZNF738    | chr19      | ENSG00000172687 | 3'UTR           | c.*1141 *1142del        |
| 3471   | ZNF740    | chr12      | ENSG00000139651 | 3'UTR           | c.*1533del              |
| 3472   | ZNF772    | chr19      | ENSG00000197128 | 3'UTR           | c.*2911del              |
| 3473   | ZNF780A   | chr19      | ENSG00000197782 | Missense        | c.14C>T                 |
| 3474   | ZNF791    | chr19      | ENSG00000173875 | Missense        | c.332G>A                |
| 3475   | ZNF81     | chrX       | ENSG00000197779 | Intron          | c.278-9294del           |
| 3476   | ZNF836    | chr19      | ENSG00000196267 | Missense        | c.2584T>C               |
| 3477   | ZNF839    | chr14      | ENSG0000022976  | 3'UTR           | c.*425T>C               |
| 3478   | ZNF883    | chr9       | ENSG00000285447 | Frame shift Ins | c.571dup                |
| 3479   | ZNF90     | chr19      | ENSG00000213988 | Intron          | c.130+61del             |
| 3480   | ZNF90     | chr19      | ENSG00000213988 | 3'Flank         |                         |
| 3481   | ZNRF3     | chr22      | ENSG00000183579 | Missense        | c.853A>G                |
| 3482   | ZNRF4     | chr19      | ENSG00000105428 | Missense        | c.530G>A                |
| 3483   | ZP1       | chr11      | ENSG00000149506 | Silent          | c.276A>C                |
| 3484   | ZPLD1     | chr3       | ENSG00000170044 | Intron          | c.1120+95A>G            |
| 3485   | ZSCAN21   | chr7       | ENSG00000166529 | 3'UTR           | c.*45C>T                |
| 3486   | ZSCAN29   | chr15      | ENSG00000140265 | 3'UTR           | c.*2710 *2711del        |
| 3487   | ZSWIM8    | chr10      | ENSG00000214655 | Missense        | c.4151G>A               |
| 3488   | ZSWIM9    | chr19      | ENSG00000185453 | Intron          | c.589-5068del           |
| 3489   | ZSWIM9    | chr19      | ENSG00000185453 | Missense        | c.934G>A                |
| 3490   | ZZEF1     | chr17      | ENSG00000074755 | Missense        | c.485G>A                |
