# Supplementary material for: Stimulating T cell responses against patient-derived breast cancer cells with neoantigen peptide-loaded peripheral blood mononuclear cells
Source: Springer Nature journal article supplement (doi:10.1007/s00262-024-03627-3), 2024-02-13
Supplement: MOESM8 [file 26729214]

Supplementary Table S4b. List of 652 nonsynonymous mutations of PC-B-148CA

| Number | HUGO Symbol | Chromosome | Transcript ID   | HGVSp    | MT Epitope Seq | WT Epitope Seq |
|--------|-------------|------------|-----------------|----------|----------------|----------------|
| 1      | A4GALT      | chr22      | ENST00000249005 | p.M230V  | FERRHEFVCM     | FERRHEFMALCM   |
| 2      | ABCA13      | chr7       | ENST00000435803 | p.R4282H | LDLTHVLLRKFR   | LDLTRVLLRKFR   |
| 3      | ABCA2       | chr9       | ENST00000479446 | p.T1092A | YNNKGYHSMPLY   | YNNKGYHSMPTY   |
| 4      | ABCA2       | chr9       | ENST00000487109 | p.Y220C  | ARVDPPEVC      | ARVDPPEVY      |
| 5      | ABCC5       | chr3       | ENST00000334444 | p.A495V  | PHIKIEMKNVTL   | PHIKIEMKNATL   |
| 6      | ABCG4       | chr11      | ENST00000619701 | p.A417D  | LYLHIGDDDDSKV  | LYLHIGDDASKV   |
| 7      | ABHD17A     | chr19      | ENST00000250974 | p.G202S  | GYSASSGRPS     | GYGASSGRPS     |
| 8      | ABLIM2      | chr4       | ENST00000341937 | p.S399G  | SESGRSTPGLSV   | SESGRSTPSLSV   |
| 9      | ABLIM3      | chr5       | ENST00000309868 | p.Y229H  | AGGKHHHPTCAR   | AGGKHYHPTCAR   |
| 10     | ACAP3       | chr1       | ENST00000354700 | p.T24M   | FRATIDEVEMDV   | FRATIDEVETDV   |
| 11     | ACCS        | chr11      | ENST00000263776 | p.W115R  | SRRLSQRDMQRV   | SWRLSQRDMQRV   |
| 12     | ADAMTS13    | chr9       | ENST00000355699 | p.P288H  | VWDPPRHQPGSA   | VWDPPRPQPGSA   |
| 13     | ADAMTS17    | chr15      | ENST00000268070 | p.A242T  | VETLVVADTDMV   | VETLVVADADMV   |
| 14     | ADAMTS3     | chr4       | ENST00000286657 | p.Y42C   | YRECELVTPVST   | YREYELVTPVST   |
| 15     | ADCY10      | chr1       | ENST00000367848 | p.R397H  | LLGHNKEINYFM   | LLGRNKEINYFM   |
| 16     | ADCY9       | chr16      | ENST00000294016 | p.T492M  | VNMRVGVHMGTV   | VNMRVGVHTGTV   |
| 17     | ADGRA2      | chr8       | ENST00000412232 | p.A617T  | FHIKNSVTSI     | FHIKNSVASI     |
| 18     | ADGRG7      | chr3       | ENST00000273352 | p.Y385N  | KYACVNWNLS     | KYACVYWNLS     |
| 19     | ADGRL1      | chr19      | ENST00000340736 | p.M78V   | DPFQVENVQCYL   | DPFQMENVQCYL   |
| 20     | AFTPH       | chr2       | ENST00000238856 | p.T793A  | MNTCASDQFQES   | MNTCTSDQFQES   |
| 21     | AGAP3       | chr7       | ENST00000397238 | p.K420R  | LNREWKKKYVTL   | LNKEWKKKYVTL   |
| 22     | AGL         | chr1       | ENST00000294724 | p.M1414V | KKLLGPLGVKTL   | KKLLGPLGMKTL   |
| 23     | AGPAT3      | chr21      | ENST00000291572 | p.Q32H   | VINFVHLCTLAL   | VINFVQLCTLAL   |
| 24     | AGRN        | chr1       | ENST00000379370 | p.C479R  | FGATRAVKNGQA   | FGATCAVKNGQA   |
| 25     | AICDA       | chr12      | ENST00000229335 | p.R36C   | RCDSATSFSLDF   | RRDSATSFSLDF   |
| 26     | AIPL1       | chr17      | ENST00000381128 | p.Q40K   | RVSGAPPEK      | RVSGAPPEQ      |
| 27     | AK2         | chr1       | ENST00000354858 | p.R132C  | ITGEPLICR      | ITGEPLIRR      |
| 28     | ALKBH6      | chr19      | ENST00000252984 | p.V83M   | RYMDKVSNSLSF   | RYVDKVSNSLSF   |
| 29     | AMIGO3      | chr3       | ENST00000320431 | p.P220H  | HNNHLPDCRLY    | HNNPLPCDCRLY   |
| 30     | AMT         | chr3       | ENST00000273588 | p.V190A  | QALQAGVADDLR   | QVLQAGVADDLR   |
| 31     | ANGPTL7     | chr1       | ENST00000376819 | p.W11R   | MLKKPLSAVTRL   | MLKKPLSAVTWL   |
| 32     | ANK2        | chr4       | ENST00000357077 | p.N709S  | LHLAAQEDKVSV   | LHLAAQEDKVVV   |
| 33     | ANKFY1      | chr17      | ENST00000570535 | p.A580V  | EAASLTSLVDSV   | EAASLTSLADSV   |
| 34     | ANKIB1      | chr7       | ENST00000265742 | p.Y754C  | TWDWECLGF      | TWDWEYLGf      |
| 35     | ANKRD33     | chr12      | ENST00000340970 | p.Q245H  | PSSLAIPGAHDR   | PSSLAIPGAQDR   |
| 36     | ANKRD52     | chr12      | ENST00000267116 | p.Q879H  | GLRMLLHHQAEV   | GLRMLLQHQAEV   |
| 37     | ANO8        | chr19      | ENST00000159087 | p.L453I  | SYLSIFYIGF     | SYLSLFYIGF     |
| 38     | ANPEP       | chr15      | ENST00000300060 | p.Q343K  | LPKSDKIGLPDF   | LPKSDQIGLPDF   |
| 39     | AOC1        | chr7       | ENST00000360937 | p.E313D  | FRLDGNVAVL     | FRLEGNVAVL     |
| 40     | APAF1       | chr12      | ENST00000359972 | p.M470T  | CTYWYNFLAYHM   | CMYWYNFLAYHM   |
| 41     | APOA2       | chr1       | ENST00000367990 | p.L3P    | MKPLAATVLLLT   | MKLLAATVLLLT   |
| 42     | AQP3        | chr9       | ENST00000645858 | p.R187C  | LCVPADDRL      | LRVPADDRL      |
| 43     | ARHGAP10    | chr4       | ENST00000336498 | p.R58P   | SVAQPKFAHSLR   | SVAQRKFAHSLR   |
| 44     | ARHGAP20    | chr11      | ENST00000260283 | p.R702H  | LRRHRHCSEPSI   | LRRHRCSEPSI    |
| 45     | ARHGEF1     | chr19      | ENST00000337665 | p.R635W  | LRLKDYQWRDL    | LRLKDYQRRLDL   |
| 46     | ARHGEF11    | chr1       | ENST00000361409 | p.T1462M | GTPVGSFH       | GTPVGSFH       |
| 47     | ARHGEF15    | chr17      | ENST00000361926 | p.R239H  | HRDLRTS        | RRDLRTS        |
| 48     | ARID1A      | chr1       | ENST00000324856 | p.S2256L | FTLYELRLDIS    | FTLYESRLDIS    |
| 49     | ARMC12      | chr6       | ENST00000288065 | p.Q7K    | KYLGQLDIRKSV   | QYLGQLDIRKSV   |
| 50     | ARNTL2      | chr12      | ENST00000261178 | p.S453R  | SEESSRQSCMRV   | SEESSRQSCMSV   |
| 51     | DM          | chr1       | ENST00000294732 | p.K1247E | NTIPDEEVVITY   | NTIPDEKVVITY   |

| Number | HUGO Symbol | Chromosome | Transcript ID   | HGVSp    | MT Epitope Seq | WT Epitope Seq |
|--------|-------------|------------|-----------------|----------|----------------|----------------|
| 52     | ASXL2       | chr2       | ENST00000336112 | p.R613H  | AHFPVSITSPNR   | ARFPVSITSPNR   |
| 53     | ASXL2       | chr2       | ENST00000672666 | p.R84H   | SPRAHFPVSITS   | SPRARFPVSITS   |
| 54     | ATAD3B      | chr1       | ENST00000673477 | p.Y438H  | LHMGQHSNKFM    | LYHMGQHSNKFM   |
| 55     | ATP2B3      | chrX       | ENST00000263519 | p.I825T  | EASDTILTDDNF   | EASDIILTDDNF   |
| 56     | ATXN1       | chr6       | ENST00000244769 | p.P649L  | VLVEYLFFVF     | VLVEYPPFFVF    |
| 57     | ATXN3       | chr14      | ENST00000553570 | p.A88V   | ICQIVKLTNSCR   | ICQIAKLTNSCR   |
| 58     | AVIL        | chr12      | ENST00000257861 | p.N538S  | FASSLSSNDVFL   | FASSLNSNDVFL   |
| 59     | B4GALT6     | chr18      | ENST00000237019 | p.A166V  | FNRVMLFNVGFK   | FNRAMLFNVGFK   |
| 60     | BANF1       | chr11      | ENST00000312175 | p.R37M   | LEEMGFDKAYVV   | LEERGFDKAYVV   |
| 61     | BBS7        | chr4       | ENST00000264499 | p.N199S  | HNGSGGDSGEDL   | HNGNGGDSGEDL   |
| 62     | BCKDHA      | chr19      | ENST00000269980 | p.I78T   | QPNVISGIPY     | QPNVISGIPIYR   |
| 63     | BCL9        | chr1       | ENST00000234739 | p.A1366V | MIPGKDRGPVGL   | MIPGKDRGPAGL   |
| 64     | BCLAF1      | chr6       | ENST00000527613 | p.S602P  | TPESFIQHIVSL   | TSESFIQHIVSL   |
| 65     | BRAF        | chr7       | ENST00000288602 | p.N355I  | FRPADEDHRIQF   | FRPADEDHRNQF   |
| 66     | BRD3        | chr9       | ENST00000303407 | p.D64Y   | FYQPVYAIKLNL   | FYQPVDAIKLNL   |
| 67     | BTN3A2      | chr6       | ENST00000377708 | p.D239N  | TASISIANPFFR   | TASISIADPFFR   |
| 68     | C17orf67    | chr17      | ENST00000397861 | p.L14P   | VLSLTLPTVF     | VLSLTLPTVF     |
| 69     | C2CD3       | chr11      | ENST00000313663 | p.M1645V | SILVERAVHLSL   | SILVERAMHLSL   |
| 70     | C2orf42     | chr2       | ENST00000264434 | p.S317R  | MNRSLLPQDAVS   | MNSLLPQDAVS    |
| 71     | C5orf15     | chr5       | ENST00000231512 | p.N67K   | NSHTPKVNAL     | NSHTPNVNAL     |
| 72     | C7          | chr5       | ENST00000313164 | p.C838R  | GQSISVTSIRPR   | GQSISVTSIRPC   |
| 73     | CACNB4      | chr2       | ENST00000534999 | p.I396F  | ALSPYPTAF      | ALSPYPTAI      |
| 74     | CALCOCO1    | chr12      | ENST00000548263 | p.Q165R  | ERNDLMLKLQL    | ERNDLMLKLQL    |
| 75     | CAMTA1      | chr1       | ENST00000303635 | p.E1510G | EKVENGFAQLTL   | EKVENEFACLTL   |
| 76     | CAPN2       | chr1       | ENST00000295006 | p.T684A  | FKQLDPENAGTI   | FKQLDPENTGTI   |
| 77     | CASKIN2     | chr17      | ENST00000321617 | p.P884L  | LSSVSGPSL      | LSSVSGPSP      |
| 78     | CD3         | chr4       | ENST00000308394 | p.Y197C  | ACSTAPGYYSWR   | AYSTAPGYYSWR   |
| 79     | CASTOR2     | chr7       | ENST00000616305 | p.R128H  | FILVHERDLPFV   | FILVRERDLPFV   |
| 80     | CBWD1       | chr9       | ENST00000377447 | p.Y236H  | YRSMMLHTQNIYF  | YRSMMLYHTQNIYF |
| 81     | CCDC110     | chr4       | ENST00000307588 | p.C504R  | TEEYSKERLKEF   | TEEYSKECLKEF   |
| 82     | CCDC144NL   | chr17      | ENST00000650066 | p.S90L   | HRAARLGDVPGV   | HRAARSGDVPGV   |
| 83     | CCDC71      | chr3       | ENST00000321895 | p.R155W  | AWGAAVGF       | RAAVGF         |
| 84     | CCKBR       | chr11      | ENST00000334619 | p.T89A   | RRLRTVANAFLL   | RRLRTVTNAFLL   |
| 85     | CCN2        | chr6       | ENST00000367976 | p.Y279H  | TAKFCGVCTD     | YAKFCGVCTD     |
| 86     | CCNI2       | chr5       | ENST00000378731 | p.V154M  | DAFEEVMLWLLR   | DAFEEVVLWLLR   |
| 87     | CD1D        | chr1       | ENST00000368171 | p.R43H   | FANSSWHTDGL    | FANSSWTRTDGL   |
| 88     | CD59        | chr11      | ENST00000652086 | p.H84R   | SVVFQALRGIGV   | SVVFQALHGIGV   |
| 89     | CDC27       | chr17      | ENST00000066544 | p.Y646C  | YCKQEKFLAEM    | YYKQEKFLAEM    |
| 90     | CDC42       | chr1       | ENST00000652582 | p.N57D   | FARSAGRQDSSR   | FARSAGRQNSSR   |
| 91     | CDH15       | chr16      | ENST00000289746 | p.P487L  | HAPVLAPPL      | HAPVLAPPP      |
| 92     | CDH19       | chr18      | ENST00000262150 | p.A693T  | SLQVGPDSIFR    | SLQVGPDSAIRF   |
| 93     | CDHR1       | chr10      | ENST00000332904 | p.Q713R  | KKPHSSRGL      | KKPHSSQGL      |
| 94     | CDHR2       | chr5       | ENST00000261944 | p.L546P  | NGELPDRESQAV   | NGELLDRESQAV   |
| 95     | CDHR4       | chr3       | ENST00000343366 | p.R141W  | SWQGGGRHGLSR   | SRQGGGRHGLSR   |
| 96     | CDKN2AIP    | chr4       | ENST00000504169 | p.P570H  | ESRPVNLHPALK   | ESRPVNLPPALK   |
| 97     | CELSR3      | chr3       | ENST00000164024 | p.C2059R | NGQRHCKEFHYR   | NGQCHCKEFHYR   |
| 98     | CELSR3      | chr3       | ENST00000164024 | p.Y1357C | FSSEELQEQLCV   | FSSEELQEQLYV   |
| 99     | CELSR3      | chr3       | ENST00000164024 | p.A2834V | TVSSVSSVRSGR   | TVSSVSSARSGR   |
| 100    | CEMIP       | chr15      | ENST00000220244 | p.R1099H | FSILSDVHNHLL   | FSILSDVHNRL    |
| 101    | CEP70       | chr3       | ENST00000264982 | p.F442I  | KVEDLLIIVDTM   | KVEDLLFIVDTM   |
| 102    | CGAS        | chr6       | ENST00000370315 | p.Y415C  | MKCLLEQLKERF   | MKYLLLEQLKERF  |
| 103    | CHAT        | chr10      | ENST00000337653 | p.R117C  | KTPIKVPCKM     | KTPIKVPCKM     |
| 104    | CHD1        | chr5       | ENST00000284049 | p.W325R  | QYLIKWKGRSHI   | QYLIKWKGWWSHI  |

| Number | HUGO Symbol | Chromosome | Transcript ID   | HGVSp    | MT Epitope Seq | WT Epitope Seq |
|--------|-------------|------------|-----------------|----------|----------------|----------------|
| 105    | CHERP       | chr19      | ENST00000546361 | p.Y897C  | YENCRRNKSYSF   | YENYRRNKSYSF   |
| 106    | CHST3       | chr10      | ENST00000373115 | p.L80P   | AENASLLSPSEL   | AENASLLSSEL    |
| 107    | CIC         | chr19      | ENST00000575354 | p.S541P  | SASSPAPSS      | SASSPASS       |
| 108    | CILP2       | chr19      | ENST00000291495 | p.Q655R  | LRAPGSAERLQV   | LRAPGSAEQLQV   |
| 109    | CIT         | chr12      | ENST00000261833 | p.R701Q  | LEEKHQEAQVSA   | LEEKHREAQVSA   |
| 110    | CIZ1        | chr9       | ENST00000372938 | p.K717R  | LRSLEKEIAGQD   | LKSLEKEIAGQD   |
| 111    | CLEC10A     | chr17      | ENST00000576617 | p.V216F  | FREMFLKLGRTL   | FREMLVFLKLGRTL |
| 112    | CLIP3       | chr19      | ENST00000360535 | p.R105H  | KIDVIGNEILHR   | KIDVIGNEILRR   |
| 113    | CLPX        | chr15      | ENST00000300107 | p.P444S  | EKYLFGFTSSNL   | EKYLFGFTSPNL   |
| 114    | CLYBL       | chr13      | ENST00000339105 | p.L243M  | AKAFGLQAIDMV   | AKAFGLQAIDL    |
| 115    | CNOT1       | chr16      | ENST00000317147 | p.S1140G | KRVGIEPNF      | KRVSIEPNF      |
| 116    | CNST        | chr1       | ENST00000366512 | p.L318I  | SESKTCIGTESS   | SESKTCLGTESS   |
| 117    | CNTNAP1     | chr17      | ENST00000264638 | p.P710S  | YWGGSQSGIQRC   | YWGGSQPGIQRC   |
| 118    | COCH        | chr14      | ENST00000216361 | p.D83Y   | AYLLLLTCF      | ADLLLLTCF      |
| 119    | COL17A1     | chr10      | ENST00000650263 | p.Y109H  | HAHEASSSTRGR   | HAYEASSSTRGR   |
| 120    | COL17A1     | chr10      | ENST00000393211 | p.Y109H  | KTHVTRHAH      | KTHVTRHAY      |
| 121    | COL27A1     | chr9       | ENST00000356083 | p.G1604V | GLQGPRVPPGPR   | GLQGPRGPPGPR   |
| 122    | COL5A2      | chr2       | ENST00000374866 | p.G441V  | SVPPGSAGPPGS   | SGPPGSAGPPGS   |
| 123    | COPA        | chr1       | ENST00000241704 | p.A1190T | GTCPEFK        | GACPEFK        |
| 124    | COPB2       | chr3       | ENST00000333188 | p.F630L  | EKQGLKQQALTV   | EKQGFKQQALTV   |
| 125    | CPNE3       | chr8       | ENST00000517490 | p.R47H   | YEVEHTEKNC     | YEVERTERKNC    |
| 126    | CPNE7       | chr16      | ENST00000268720 | p.S153P  | FLCCTEPSHLAR   | FLCCTESSHLAR   |
| 127    | CR1         | chr1       | ENST00000400960 | p.A1073T | TITNGDFISTNR   | TIANGDFISTNR   |
| 128    | CRACR2B     | chr11      | ENST00000525077 | p.Q299R  | AREQIRRLSEEA   | AQEQIRRLSEEA   |
| 129    | CRELD1      | chr3       | ENST00000326434 | p.R204C  | YFEAECNASHLV   | YFEAERNASHLV   |
| 130    | CRY1        | chr12      | ENST00000008527 | p.R348C  | LCQEGWIHHLAR   | LRQEGWIHHLAR   |
| 131    | CRYBG1      | chr6       | ENST00000369066 | p.L214S  | GSKPRNHFGVGR   | GLKPRNHFGVGR   |
| 132    | CSAD        | chr12      | ENST00000267085 | p.I181T  | STSNMYAVNLAR   | SISNMYAVNLAR   |
| 133    | CSMD1       | chr8       | ENST00000335551 | p.G86W   | EYWNMNCVWL     | EYGNMNCVWLI    |
| 134    | CSMD2       | chr1       | ENST00000373381 | p.G33R   | ALVPGARSRWGR   | ALVPGAGSRWGR   |
| 135    | CSMD3       | chr8       | ENST00000297405 | p.R1574Q | ERITCIQVENQY   | ERITCIQVENRY   |
| 136    | CSPP1       | chr8       | ENST00000262210 | p.L1013V | HTLEIQQAVALR   | HTLEIQQAALLR   |
| 137    | CTAGE9      | chr6       | ENST00000314099 | p.I174M  | LMADISKSMQSL   | LMADISKSIQSL   |
| 138    | CTNNA2      | chr2       | ENST00000402739 | p.M858I  | SDSSILDSATSL   | SDSSMLDSATSL   |
| 139    | CTR9        | chr11      | ENST00000361367 | p.D1120G | RSHSGVSENGSR   | RSHSGVSENDNR   |
| 140    | CYP1A2      | chr15      | ENST00000343932 | p.V487M  | EFSVPPGMKVDL   | EFSVPPGVKVDL   |
| 141    | CYP3A7      | chr7       | ENST00000336374 | p.S180N  | LKHVFGAYNMDV   | LKHVFGAYSMDV   |
| 142    | CYYR1       | chr21      | ENST00000299340 | p.V8M    | MDAPRLPMRPGV   | MDAPRLPVRPGV   |
| 143    | DACT2       | chr6       | ENST00000607983 | p.R212H  | QSTVEISARAH    | QSTVEISARARL   |
| 144    | DAGLA       | chr11      | ENST00000257215 | p.H422Y  | GYHGTWLGHKGM   | GHHGTWLGHKGM   |
| 145    | DAGLB       | chr7       | ENST00000297056 | p.L630F  | AEFKIFIGPKM    | AEFKILIGPKM    |
| 146    | DCAF8L1     | chrX       | ENST00000441525 | p.D315E  | IELRQDRPASKV   | IDLRQDRPASKV   |
| 147    | DCHS1       | chr11      | ENST00000299441 | p.R866Q  | LEVQAGSGV      | LEVRAGSGV      |
| 148    | DDB1        | chr11      | ENST00000301764 | p.N1049S | LSESWYLLLDLDM  | LSESWYNLLLDLDM |
| 149    | DDI1        | chr11      | ENST00000302259 | p.R118C  | RPQHPPGQQQCT   | RPQHPPGQQQRT   |
| 150    | DDX1        | chr2       | ENST00000233084 | p.L418P  | SFDVKKPSEKIM   | SFDVKKLSEKIM   |
| 151    | DDX3X       | chrX       | ENST00000399959 | p.R375H  | VHHTMMFSATF    | VRHTMMFSATF    |
| 152    | DENND5A     | chr11      | ENST00000328194 | p.L1237P | WIAPLADCPITA   | WIALLADCPITA   |
| 153    | DENND5B     | chr12      | ENST00000354285 | p.M223V  | FVQACKKFLIQL   | FMQACKKFLIQL   |
| 154    | DHRS7       | chr14      | ENST00000536410 | p.S278P  | FKSGVDADPSYF   | FKSGVDADSSYF   |
| 155    | DLD         | chr7       | ENST00000205402 | p.D37N   | YANQPIDADVTV   | YADQPIDADVTV   |
| 156    | DMRT3       | chr9       | ENST00000190165 | p.N2S    | MSGYGSPYL      | MNGYGSPYL      |
| 157    | DNAH1       | chr3       | ENST00000420323 | p.I803V  | IVGPFYINTDNL   | IIGPFYINTDNL   |

| Number | HUGO Symbol | Chromosome | Transcript ID   | HGVSp    | MT Epitope Seq | WT Epitope Seq |
|--------|-------------|------------|-----------------|----------|----------------|----------------|
| 158    | DNAJA1      | chr9       | ENST00000330899 | p.H34R   | YRPDKNPNE      | YHPDKNPNE      |
| 159    | DNASE1      | chr16      | ENST00000246949 | p.R148G  | RFFSRFTEVGEF   | RFFSRFTEVREF   |
| 160    | DNM1        | chr9       | ENST00000341179 | p.A623V  | SWKASFLRVGVY   | SWKASFLRAGVY   |
| 161    | DNMT3B      | chr20      | ENST00000201963 | p.R160Q  | TRSLRQRATASA   | TRSLRRRATASA   |
| 162    | DOC2A       | chr16      | ENST00000350119 | p.G45S   | YFPRGPGPEGSG   | YFPRGPGPEGGG   |
| 163    | DOCK1       | chr10      | ENST00000280333 | p.L975P  | FKNPIGKNVYPF   | FKNLIGKNVYPF   |
| 164    | DOCK2       | chr5       | ENST00000524185 | p.G57D   | GYLIKHKMLQDI   | GYLIKHKMLQGI   |
| 165    | DOCK7       | chr1       | ENST00000454575 | p.N842S  | GNHDQHGRSSLL   | GNHDQHGRNSLL   |
| 166    | DPH5        | chr1       | ENST00000342173 | p.E264G  | IHPMEMGMLSLF   | IHPMEMEMLSLF   |
| 167    | DSG3        | chr18      | ENST00000257189 | p.T220N  | LSRNTGEVRNLT   | LSRNTGEVRTLT   |
| 168    | DUSP10      | chr1       | ENST00000366899 | p.Y363C  | YHCEKGLFNYKR   | YHYEKGLFNYKR   |
| 169    | DUSP7       | chr3       | ENST00000495880 | p.K160N  | ASVLGLLLQNLNR  | ASVLGLLLQKLR   |
| 170    | DYNLL1      | chr12      | ENST00000242577 | p.T26A   | AAQALEKYNIEK   | ATQALEKYNIEK   |
| 171    | ECEL1       | chr2       | ENST00000304546 | p.A45T   | RSTTGARSGLPR   | RSATGARSGLPR   |
| 172    | ECHDC3      | chr10      | ENST00000379215 | p.A153T  | NGLAAATGCQLV   | NGLAAAAGCQLV   |
| 173    | EEF1AKMT1   | chr13      | ENST00000382754 | p.Q57R   | FWYSRETALQLA   | FWYSQETALQLA   |
| 174    | EEF2KMT     | chr16      | ENST00000427587 | p.L11H   | ENAGTEHLLQSF   | ENAGTELLLQSF   |
| 175    | EFNB2       | chr13      | ENST00000646441 | p.R294G  | DIHPLGTADSV    | DIHPLRTADSV    |
| 176    | EFTUD2      | chr17      | ENST00000426333 | p.A382T  | LYKILTQVVGDV   | LYKILAQVVGDV   |
| 177    | EQ3         | chr14      | ENST00000250457 | p.N33S   | FCYLDNFLGEVV   | FCYLDNFLGEVV   |
| 178    | EHD2        | chr19      | ENST00000263277 | p.L512P  | FASHPI         | FASHLI         |
| 179    | EIF3L       | chr22      | ENST00000412331 | p.T511A  | RSFLKLYATMPV   | RSFLKLYTTPV    |
| 180    | EIF4G3      | chr1       | ENST00000400422 | p.A1510S | KASIIADSSTFR   | KAIIADSSTFR    |
| 181    | EIF5A       | chr17      | ENST00000336452 | p.Q125R  | NDFQLIGIRDGY   | NDFQLIGIQDGY   |
| 182    | ELMO2       | chr20      | ENST00000290246 | p.L289F  | LYVFQVLT       | LYVLQVLT       |
| 183    | ELP5        | chr17      | ENST00000396627 | p.H143Y  | LPCTTLCQVLYA   | LPCTTLCQVLHA   |
| 184    | EMC1        | chr1       | ENST00000375199 | p.P621H  | RHILQSLLPVM    | RPILQSLLPVM    |
| 185    | ENTPD6      | chr20      | ENST00000354989 | p.R400W  | IAAKYVCWTLET   | IAAKYVCRTLET   |
| 186    | EPB41L2     | chr6       | ENST00000337057 | p.V586M  | AMVQDGDGRREV   | AVVQDGDGRREV   |
| 187    | EPC1        | chr10      | ENST00000263062 | p.I74M   | KRDNMVMVPPEA   | KRDNMVIPVPEA   |
| 188    | EPG5        | chr18      | ENST00000282041 | p.N2096D | FLGSVLCEVDWV   | FLGSVLCEVNWV   |
| 189    | EPHA4       | chr2       | ENST00000281821 | p.G675R  | MRQFDHPNIIHL   | MGQFDHPNIIHL   |
| 190    | EPHB2       | chr1       | ENST00000374630 | p.N755S  | VSSNLVCKVSDF   | VNSNLVCKVSDF   |
| 191    | EPPK1       | chr8       | ENST00000568225 | p.D1629G | AERAVTGYTGPY   | AERAVTGYTDPY   |
| 192    | EPS8        | chr12      | ENST00000281172 | p.V398I  | LNYTINGDERQL   | LNYTVNGDERQL   |
| 193    | ERCC1       | chr19      | ENST00000013807 | p.K213R  | YRAYEQKPADLL   | YKAYEQKPADLL   |
| 194    | ERCC3       | chr2       | ENST00000285398 | p.N499D  | MELQNDGYIAKV   | MELQNNGYIAKV   |
| 195    | ERCC6       | chr10      | ENST00000374127 | p.V447I  | LKKKIQIQPNM    | LKKKIQQPNM     |
| 196    | ERG28       | chr14      | ENST00000256319 | p.T23A   | IIAMGNALQSFR   | IIAMGNLQSFR    |
| 197    | EXOC3       | chr5       | ENST00000512944 | p.R608W  | LWAVMQKRISFR   | LRAVMQKRISFR   |
| 198    | EXOC8       | chr1       | ENST00000366645 | p.A295T  | SEKRRREQETA    | SEKRRREQEAAA   |
| 199    | EYA1        | chr8       | ENST00000340726 | p.A411G  | TYNFGTDGFPGA   | TYNFGTDGFPAA   |
| 200    | EYA4        | chr6       | ENST00000355286 | p.A292V  | QYYSASTYGVYM   | QYYSASTYGAYM   |
| 201    | F11R        | chr1       | ENST00000368026 | p.L11M   | TKAQVERKMLCL   | TKAQVERKLLCL   |
| 202    | FAM13B      | chr5       | ENST00000033079 | p.A460T  | VQGETACVSI     | VQGEAACVSI     |
| 203    | FAM160A2    | chr11      | ENST00000265978 | p.P805H  | VFQHSVKSLQV    | VFQPSVKSLQV    |
| 204    | FAM160B1    | chr10      | ENST00000369248 | p.K297R  | AAARCLTQSTCL   | AAAKCLTQSTCL   |
| 205    | FAM161B     | chr14      | ENST00000286544 | p.V162I  | RSISSWASSITV   | RSVSSWASSITV   |
| 206    | FAM25G      | chr10      | ENST00000452267 | p.T42I   | AKEIGEKAIAEA   | AKETGEKAIAEA   |
| 207    | FAM3A       | chrX       | ENST00000447601 | p.L169P  | KLFSEPGSRNAK   | KLFSELGSRNAK   |
| 208    | FANCE       | chr6       | ENST00000229769 | p.L239P  | ERPEHKSPE      | ERPEHKSLE      |
| 209    | FARF1       | chr13      | ENST00000319562 | p.P10T   | MGEIEQRPTTGS   | MGEIEQRPTPGS   |
| 210    | FBN1        | chr15      | ENST00000316623 | p.D2801G | RYLIESGNEGGF   | RYLIESGNEDGF   |

| Number | HUGO Symbol | Chromosome | Transcript ID   | HGVSp    | MT Epitope Seq | WT Epitope Seq |
|--------|-------------|------------|-----------------|----------|----------------|----------------|
| 211    | FBN1        | chr15      | ENST00000316623 | p.Y1219C | TFCTNSEGSCEC   | TFCTNSEGSYEC   |
| 212    | FBN3        | chr19      | ENST00000270509 | p.R48W   | RRWGSPGIL      | RRRGSPGIL      |
| 213    | FBXO11      | chr2       | ENST00000403359 | p.Q56R   | PPPPQQQQQQR    | PPPPQQQQQQQP   |
| 214    | FCER2       | chr19      | ENST00000346664 | p.Y189C  | QVWHARCACDDM   | QVWHARYACDDM   |
| 215    | FCHO1       | chr19      | ENST00000597512 | p.R672H  | TFPAGIVHVF     | TFPAGIVRVF     |
| 216    | FCRL4       | chr1       | ENST00000271532 | p.N180T  | YGDENDVFRSTF   | YGDENDVFRSNF   |
| 217    | FGD3        | chr9       | ENST00000337352 | p.R552M  | KRMHHCKLCGAV   | KRRHHCKLCGAV   |
| 218    | FGF6        | chr12      | ENST00000228837 | p.G77D   | IAGVNWESDYLV   | IAGVNWESGYLV   |
| 219    | FGF6        | chr12      | ENST00000228837 | p.R105Q  | FHLQVLPDQIS    | FHLQVLPDGRIS   |
| 220    | FGF7        | chr15      | ENST00000267843 | p.T179M  | RGKKMKKEQKTA   | RGKKTKEQKTA    |
| 221    | FLII        | chr17      | ENST00000327031 | p.D1193G | FCQDDLADGDIM   | FCQDDLADDDIM   |
| 222    | FLNB        | chr3       | ENST00000295956 | p.Q2296R | TVMSLRESGLKV   | TVMSLQESGLKV   |
| 223    | FMNL3       | chr12      | ENST00000335154 | p.Q1003R | HCRPMVVRHQAR   | HCQPMVVRHQAR   |
| 224    | FMOD        | chr1       | ENST00000354955 | p.A267V  | YFRGVPKLLYVR   | YFRGAPKLLYVR   |
| 225    | FOXA1       | chr14      | ENST00000250448 | p.H382P  | AHGLAPPES      | AHGLAFS        |
| 226    | FOXD2       | chr1       | ENST00000334793 | p.A139D  | YSYIALITMDIL   | YSYIALITMAIL   |
| 227    | FOXP4       | chr6       | ENST00000307972 | p.A642V  | HQVQVKEEPVEA   | HQVQVKEEPAEA   |
| 228    | FOXRED2     | chr22      | ENST00000216187 | p.Y391C  | ILGTASHSVDCR   | ILGTASHSVDYR   |
| 229    | FRMD1       | chr6       | ENST00000283309 | p.D193G  | ACALQAGLGEHR   | ACALQADLGEHR   |
| 230    | FRMPD1      | chr9       | ENST00000377765 | p.S1284N | SEGKSDNSSICL   | SEGKSDSSICL    |
| 231    | FSD2        | chr15      | ENST00000334574 | p.C608R  | SDTHFTRRVAVM   | SDTHFTRCVAVM   |
| 232    | FZD2        | chr17      | ENST00000315323 | p.R89C   | KVQCSPFLCFFL   | KVQCSPFLRFFL   |
| 233    | GAA         | chr17      | ENST00000302262 | p.I823T  | LRAGYTIPL      | LRAGYIPL       |
| 234    | GAB1        | chr4       | ENST00000262994 | p.Q643H  | RKHKSSGSGSSV   | RKQKSSGSGSSV   |
| 235    | GABPA       | chr21      | ENST00000354828 | p.I210V  | EFSMTDIDLTL    | EFSMTDIDLTL    |
| 236    | GAL3ST4     | chr7       | ENST00000360039 | p.A292S  | LSWLDSVFDLVM   | LAWLDSVFDLVM   |
| 237    | GAREM1      | chr18      | ENST00000269209 | p.G758V  | SVSPDLSEDQYF   | SGSPDLSEDQYF   |
| 238    | GATA5       | chr20      | ENST00000252997 | p.S306P  | IAKRSSGPTR     | IAKRSSGSTR     |
| 239    | GCNT1       | chr9       | ENST00000376730 | p.A170T  | MGITSCFSNVFV   | MGIASCFSNVFV   |
| 240    | GET4        | chr7       | ENST00000265857 | p.S134G  | SGGSGKLGHPR    | SSGSGKLGHPR    |
| 241    | GJA4        | chr1       | ENST00000342280 | p.P59S   | ECNTAQSGCTNV   | ECNTAQPCTNV    |
| 242    | GLI2        | chr2       | ENST00000361492 | p.R914W  | MSLWTRLALLDA   | MSLRTRLALLDA   |
| 243    | GLMP        | chr1       | ENST00000362007 | p.G242S  | LEVATLSQGPDC   | LEVATLGGQPD    |
| 244    | GNAI2       | chr3       | ENST00000313601 | p.P289H  | ICFHEYTGANKY   | ICFPYTGANKY    |
| 245    | GPC6        | chr13      | ENST00000377047 | p.P305S  | ERLEGSFNIESV   | ERLEGPFNIESV   |
| 246    | GPR34       | chrX       | ENST00000378138 | p.R266H  | YATTAHNSFIVL   | YATTARNFIVL    |
| 247    | GRAMD1B     | chr11      | ENST00000529750 | p.V498A  | RNKSRLRASTEL   | RNKSRLRVSTEL   |
| 248    | GREM2       | chr1       | ENST00000318160 | p.R90C   | VSEEGCRSCTIL   | VSEEGCRSRTIL   |
| 249    | GRM5        | chr11      | ENST00000305432 | p.A1120V | VAKPDLEEL      | AAKPDLEEL      |
| 250    | G RTP1      | chr13      | ENST00000326039 | p.M141T  | ALTERLGVLWTL   | ALMERLGVLWTL   |
| 251    | GSTK1       | chr7       | ENST00000358406 | p.L43I   | RPSIITGIMKDS   | RPSLITGIMKDS   |
| 252    | GTF3C1      | chr16      | ENST00000356183 | p.T200A  | ELQRDLHTAAFK   | ELQRDLHTTAFK   |
| 253    | GTF3C6      | chr6       | ENST00000329970 | p.M105T  | YKCHTMKKLSTT   | YKCHTMKKLSTT   |
| 254    | GTPBP2      | chr6       | ENST00000307126 | p.V326A  | KIDLCAKTTAER   | KIDLCAKTTVER   |
| 255    | H1FNT       | chr12      | ENST00000335017 | p.A176V  | RRNVRAKAKANA   | RRNARAKAKANA   |
| 256    | HCFC1       | chrX       | ENST00000310441 | p.A812V  | KVMTSGTGAPVK   | KVMTSGTGAPAK   |
| 257    | HCN2        | chr19      | ENST00000251287 | p.A322V  | YKTARVLRVRF    | YKTARALRVRF    |
| 258    | HDAC9       | chr7       | ENST00000401921 | p.Y846H  | PMGDVEHLEAFR   | PMGDVEYLEAFR   |
| 259    | HECTD2      | chr10      | ENST00000298068 | p.A722T  | SDRVPVGGMTDL   | SDRVPVGGMADL   |
| 260    | HELZ2       | chr20      | ENST00000467148 | p.Y552H  | FGTGKHTTL      | FGTGKTYTL      |
| 261    | HERC1       | chr15      | ENST00000443617 | p.A171V  | LLFVLLRQSWMM   | LLFALLRQSWMM   |
| 262    | HIP1R       | chr12      | ENST00000253083 | p.R1000W | LEKTLEAERMWL   | LEKTLEAERMRL   |
| 263    | HIVEP2      | chr6       | ENST00000367603 | p.T2340M | AIASLRIAMEEA   | AIASLRIATEEA   |

| Number | HUGO Symbol | Chromosome | Transcript ID   | HGVSp            | MT Epitope Seq | WT Epitope Seq |
|--------|-------------|------------|-----------------|------------------|----------------|----------------|
| 264    | HMHB1       | chr5       | ENST00000289448 | p.K19T           | KRGSLSHVWTSEL  | KRGSLSHVWKSEL  |
| 265    | HOXA1       | chr7       | ENST00000643460 | p.Y123C          | QEADVSGGCPQC   | QEADVSGGYPQC   |
| 266    | HOXA9       | chr7       | ENST00000343483 | p.Y11C           | YCVDSFLLGADA   | YYVDSFLLGADA   |
| 267    | HRCT1       | chr9       | ENST00000354323 | p.H89L           | PNVGLHLHHHPR   | PNVGLHHHHHPR   |
| 268    | HRH3        | chr20      | ENST00000317393 | p.N75S           | NFFLLSLAISDF   | NFFLLNLAISDF   |
| 269    | HSPG2       | chr1       | ENST00000374695 | p.E2346K         | QPIRIKPSSSQV   | QPIRIEPPSSSQV  |
| 270    | HUWE1       | chrX       | ENST00000262854 | p.E4064G         | LRGWYMIISREM   | LREWYMIISREM   |
| 271    | IDH2        | chr15      | ENST00000330062 | p.V209M          | EMYNFPAGGVGM   | EVYNFPAGGVGM   |
| 272    | IFRD2       | chr3       | ENST00000417626 | p.R179C          | FLLECRLTLADA   | FLLETRLTLADA   |
| 273    | IFT140      | chr16      | ENST00000361339 | p.K64R           | YRKCRRHDL      | YRKCKRHDL      |
| 274    | IGLC2       | chr22      | ENST00000390323 | p.N22S           | SEELQASKATLV   | SEELQANKATLV   |
| 275    | IGSF11      | chr3       | ENST00000354673 | p.L207M          | IRNISAMSSG     | IRNISALSSG     |
| 276    | IKZF1       | chr7       | ENST00000331340 | p.A181V          | CNYVCCRRLDALT  | CNYACRRRDALT   |
| 277    | IL17RD      | chr3       | ENST00000296318 | p.N55S           | KITFKYDNCT     | LYNITFKYDNCT   |
| 278    | IL36RN      | chr2       | ENST00000346807 | p.R102W          | AKESKSFTFYWR   | AKESKSFTFYRR   |
| 279    | IMMT        | chr2       | ENST00000409258 | p.V10M           | LRACQLSGMTAA   | LRACQLSGVTAA   |
| 280    | ING3        | chr7       | ENST00000315870 | p.L126S          | ERRSLESSTPSQ   | ERRSLELDTPSQ   |
| 281    | INPP5K      | chr17      | ENST00000421807 | p.S353P          | DMMVSYSSPDF    | DMMVSYSSPDF    |
| 282    | IQCG        | chr3       | ENST00000265239 | p.L37M           | MPKETDIEI      | IPKETDIEI      |
| 283    | IQSEC1      | chr3       | ENST00000618604 | p.S808L          | RSALSSSLRDLL   | RSALSSSLRDLS   |
| 284    | IQSEC1      | chr3       | ENST00000273221 | p.S930L          | ALSSSLRDLEA    | ALSSSLRDLEA    |
| 285    | IRF1        | chr5       | ENST00000245414 | p.G45D           | AAKHDWDINKDA   | AAKHGWDINKDA   |
| 286    | IRX2        | chr5       | ENST00000302057 | p.N139S          | HRKSPYPTK      | HRKNPYPTK      |
| 287    | ITGA9       | chr3       | ENST00000264741 | p.Y513H          | EIQHVLMAADV    | EIQYVLMADV     |
| 288    | ITGAV       | chr2       | ENST00000261023 | p.S59G           | FFVPGASSRMFL   | FFVPSASSRMFL   |
| 289    | ITGB1BP2    | chrX       | ENST00000373829 | p.V288A          | FLMPSRAEISLV   | FLMPSRVEISLV   |
| 290    | ITGB6       | chr2       | ENST00000283249 | p.G561A          | NGDCDCAECVCR   | NGDCDCGECVCR   |
| 291    | ITM2C       | chr2       | ENST00000326407 | p.R95C           | ARDNFFCCGVLY   | ARDNFFRCGVLY   |
| 292    | JPH2        | chr20      | ENST00000342272 | p.P55H           | VYTWHSNGTF     | VYTWPSNGTF     |
| 293    | KATNBL1     | chr15      | ENST00000256544 | p.I211V          | QYVSLGCCVDLL   | QYISLGCCVDLL   |
| 294    | KCNAB1      | chr3       | ENST00000471742 | p.T76S           | ETTRAESGMAYR   | ETTRAETGMAYR   |
| 295    | KCNC3       | chr19      | ENST00000477616 | p.M685V          | IDQPAVSPEDKS   | IDQPAMSPEDKS   |
| 296    | KCTD6       | chr3       | ENST00000355076 | p.A49V           | FPTVRDPQGNFY   | FPTARDPQGNFY   |
| 297    | KDM4C       | chr9       | ENST00000381309 | p.L692F          | MCFFYSEENIEY   | MCFIYSEENIEY   |
| 298    | KDM6B       | chr17      | ENST00000254846 | p.T321A          | AAHPPGHRL      | TAHPPGHRL      |
| 299    | KIAA1109    | chr4       | ENST00000306802 | p.W1303R         | FMCNTRHLEPTL   | FMCNTWHLEPTL   |
| 300    | KIAA1324    | chr1       | ENST00000529753 | p.S146R          | LSANMELDDRAA   | LSANMELDDSA    |
| 301    | KIAA1324    | chr1       | ENST00000529753 | p.P746L          | TVPGSLLLGTC    | TVPGSLLLPGTC   |
| 302    | KIAA1671    | chr22      | ENST00000358431 | p.R1169C         | TLRSCPKDLVPR   | TLRSRPKDLVPR   |
| 303    | KIF26A      | chr14      | ENST00000315264 | p.A1469T         | ERPPTGPTL      | ERPPTGPAL      |
| 304    | KIFC2       | chr8       | ENST00000301332 | p.S612T          | VTLTLRAATPPR   | VTLTLRADPR     |
| 305    | KIT         | chr4       | ENST00000288135 | p.V532I          | VIIAGMMCHIVM   | VIVAGMMCHIVM   |
| 306    | KLF9        | chr9       | ENST00000377126 | p.C82Y           | KYRPIQTPSVYS   | KYRPIQTPSVCS   |
| 307    | KLHDC2      | chr14      | ENST00000298307 | p.H221R          | ARACATVGNRGF   | AHACATVGNRGF   |
| 308    | KLHL18      | chr3       | ENST00000232766 | p.L193P          | SRDEPNVKS      | SRDELNVKS      |
| 309    | KLHL4       | chrX       | ENST00000373114 | p.A430T          | PRKSTVGTL      | PRKSTVGAL      |
| 310    | KMT2A       | chr11      | ENST00000389506 | p.R158K          | FLGFGSDEEVKV   | FLGFGSDEEVRV   |
| 311    | KNG1        | chr3       | ENST00000644859 | p.G504R          | HRKHKNKKGK     | HGKHKNKKGK     |
| 312    | KRI1        | chr19      | ENST00000312962 | K331_R332delinsN | ENWEETRERKKR   | EKREETRERKKR   |
| 313    | KRT24       | chr17      | ENST00000264651 | p.A319V          | RVQYEELAEQNR   | RAQYEELAEQNR   |
| 314    | KRT35       | chr17      | ENST00000246639 | p.R408H          | GPSAAHTNCSPR   | GPSAARTNCSPR   |
| 315    | KRTAP26-1   | chr21      | ENST00000360542 | p.H177R          | YRPQSLRVVSSS   | YRPQSLHVVSSS   |
| 316    | KSR1        | chr17      | ENST00000644974 | p.L47R           | QKRIDISIGSLR   | QKLIDISIGSLR   |

| Number | HUGO Symbol | Chromosome | Transcript ID   | HGVSp    | MT Epitope Seq | WT Epitope Seq |
|--------|-------------|------------|-----------------|----------|----------------|----------------|
| 317    | L3HYPDH     | chr14      | ENST00000247194 | p.H72R   | LMFEPRGRRDMY   | LMFEPRGHRDMY   |
| 318    | LAMA4       | chr6       | ENST00000230538 | p.E503K  | VRDAKDMNRATA   | VRDAEDMNRATA   |
| 319    | LAMB1       | chr7       | ENST00000222399 | p.E1202G | NRTFLGKAKA     | NRTFLEKAKA     |
| 320    | LATS1       | chr6       | ENST00000253339 | p.T487A  | ANSQPSATTVAA   | ANSQPSATTVTA   |
| 321    | LHCGR       | chr2       | ENST00000294954 | p.S420P  | ASVDPQTKGQYY   | ASVDSQTKGQYY   |
| 322    | LINGO1      | chr15      | ENST00000355300 | p.R473W  | LVSAKSNGWLV    | LVSAKSNGRLTV   |
| 323    | LMNTD1      | chr12      | ENST00000413632 | p.S44P   | VYSLVHFPPKML   | VYSLVHFSPKML   |
| 324    | LMTK3       | chr19      | ENST00000270238 | p.P1195L | RRLEPAPLR      | RRLEPAPPR      |
| 325    | LRP1B       | chr2       | ENST00000389484 | p.C1042R | FSDEAQINRTKE   | FSDEAQINCTKE   |
| 326    | LRR1        | chr14      | ENST00000298288 | p.R12W   | VISWHLPALGLR   | VISRHLPALGLR   |
| 327    | LRRC37A3    | chr17      | ENST00000319651 | p.S90P   | FDHLGPPASSEM   | FDHLGPSASSEM   |
| 328    | LRRC7       | chr1       | ENST00000370958 | p.K153E  | IKCCECLTIEA    | IKCKCLTIEA     |
| 329    | LRRC9       | chr14      | ENST00000647410 | p.R806G  | LGLSVIGRLKTL   | LRLSVIGRLKTL   |
| 330    | LRRFIP2     | chr3       | ENST00000336686 | p.V671A  | EKADELKAEKR    | EKVEDELKAEKR   |
| 331    | LRSAM1      | chr9       | ENST00000300417 | p.P214S  | YYSPSQYLL      | YYPPSQYLL      |
| 332    | LSR         | chr19      | ENST00000347609 | p.I158F  | YYQGRRTI       | YYQGRRITI      |
| 333    | LTC4S       | chr5       | ENST00000292596 | p.L14P   | AAVTLPGVLLQA   | AAVTLLGVLLQA   |
| 334    | LUC7L3      | chr17      | ENST00000393227 | p.R312Q  | SRSQDHKRSRSR   | SRSRDHKRSRSR   |
| 335    | LY75        | chr2       | ENST00000263636 | p.T1473A | FEWSDGSF       | FEWSDGSTF      |
| 336    | LYG2        | chr2       | ENST00000409238 | p.R64H   | IHGSEMFAEMDL   | IRGSEMFAEMDL   |
| 337    | LZTS2       | chr10      | ENST00000370220 | p.S570I  | GILRAQVERLRV   | GSLRAQVERLRV   |
| 338    | MACC1       | chr7       | ENST00000332878 | p.V609A  | KIGLAHCKNVKV   | KIGLVHCKNVKV   |
| 339    | MACF1       | chr1       | ENST00000671089 | p.R849W  | LEDNSQWTKWKV   | LEDNSQRTKWKV   |
| 340    | MAFB        | chr20      | ENST00000373313 | p.S56P   | TRLQPAGSV PST  | TRLQPAGSVSST   |
| 341    | MAGED1      | chrX       | ENST00000326587 | p.P353A  | IWQNAVIWPNI    | IWQNPVIWPNI    |
| 342    | MAN2A2      | chr15      | ENST00000360468 | p.V418I  | KSQLFRSNILLV   | KSQLFRSNVLLV   |
| 343    | MAP6        | chr11      | ENST00000304771 | p.G475C  | GLLKGQCPM      | GLLKGQGPM      |
| 344    | MAPK6       | chr15      | ENST00000261845 | p.E407G  | PRKYLDGDRGKY   | PRKYLDGDREKY   |
| 345    | MAST1       | chr19      | ENST00000251472 | p.P369L  | SKAKKPLGENDF   | SKAKKPPGENDF   |
| 346    | MC4R        | chr18      | ENST00000299766 | p.I289M  | FNLYLMLIMCNS   | FNLYLILIMCNS   |
| 347    | MCAT        | chr22      | ENST00000290429 | p.T282M  | MQALKAVDI      | TQALKAVDI      |
| 348    | MCM3AP      | chr21      | ENST00000291688 | p.F139C  | VNSGCGKTEFSF   | VNSGFGKTEFSF   |
| 349    | MCM7        | chr7       | ENST00000491245 | p.L33S   | ICENARPSPSR    | ICENARPSPLPR   |
| 350    | MDH1B       | chr2       | ENST00000374412 | p.M99T   | YYDVTSSMTTEL   | YYDVTSSMTTEL   |
| 351    | MECOM       | chr3       | ENST00000264674 | p.A899V  | GVILDDKEDAYF   | GAILDDKEDAYF   |
| 352    | MTL23       | chr17      | ENST00000341249 | p.Q12K   | VVLAKYLFHRR    | VVLAQYLFHRR    |
| 353    | MFAP1       | chr15      | ENST00000267812 | p.N24S   | RSEKGEISMEKV   | RNEKGEISMEKV   |
| 354    | MFS1        | chr3       | ENST00000264266 | p.Y417H  | LDSRGHLFLEVF   | LDSRGYLFLEVF   |
| 355    | MGAM        | chr7       | ENST00000549489 | p.G466V  | SSSKPYVPYDR    | SSSKPYGPYDR    |
| 356    | MGAT3       | chr22      | ENST00000341184 | p.R514H  | TAAGGWHR       | TAAGGWHR       |
| 357    | MGAT5B      | chr17      | ENST00000428789 | p.D114N  | RAGGNLHFPADR   | RAGGDLHFPADR   |
| 358    | MGAT5B      | chr17      | ENST00000428789 | p.R463Q  | KQLIKGGKNM     | KRLIKGGKNM     |
| 359    | MICALL2     | chr7       | ENST00000297508 | p.V384A  | RAAAPQTTL      | RVAAPQTTL      |
| 360    | MMP12       | chr11      | ENST00000571244 | p.R402M  | QYWYDERRQMN    | QYWRYDERRQMN   |
| 361    | MRPS31      | chr13      | ENST00000323563 | p.M106T  | KDLLGIKGTKV    | KDLLGIKGMKV    |
| 362    | MSTO1       | chr1       | ENST00000649846 | p.S428G  | DRACHTGHRLMV   | DRACHTSHRLMV   |
| 363    | MSTO1       | chr1       | ENST00000245564 | p.S428G  | IDRACHTGQLTP   | IDRACHTSQLTP   |
| 364    | MTA3        | chr2       | ENST00000407270 | p.Y13C   | VCFENSSNPYL    | VYFENSSNPYL    |
| 365    | MTHFD1L     | chr6       | ENST00000367321 | p.S690A  | FANIAHGNSVL    | FANIAHGNSSVL   |
| 366    | MTHFD1L     | chr6       | ENST00000367321 | p.D867E  | VEKIRTIAQAVY   | VDKIRTIAQAVY   |
| 367    | MUC17       | chr7       | ENST00000306151 | p.F4199V | SVKVTEELK      | SVKFTEELK      |
| 368    | MYH7B       | chr20      | ENST00000262873 | p.I217V  | LRNRDNQSMILT   | LRNRDNQSMILT   |
| 369    | MYLK        | chr3       | ENST00000475616 | p.W853R  | RYGSLRPGPAR    | RYGSLRPGWPAR   |

| Number | HUGO Symbol | Chromosome | Transcript ID   | HGVSp    | MT Epitope Seq | WT Epitope Seq |
|--------|-------------|------------|-----------------|----------|----------------|----------------|
| 370    | MYO18A      | chr17      | ENST00000527372 | p.T1698A | FACAAAVKARKA   | FTCAAAVKARKA   |
| 371    | MYO18B      | chr22      | ENST00000335473 | p.L1591M | LTCDLEDTCVML   | LTCDLEDTCVLL   |
| 372    | MYO5A       | chr15      | ENST00000356338 | p.R903H  | RMMAKHELKCLK   | RMMAKRELKCLK   |
| 373    | MYO7A       | chr11      | ENST00000409619 | p.K1297N | LYIALFDNVSSL   | LYIALFDKVSSL   |
| 374    | NAIF1       | chr9       | ENST00000373078 | p.R54M   | LRMVNAVATCRR   | LRRVNAVATCRR   |
| 375    | NAT10       | chr11      | ENST00000257829 | p.Y171H  | SRHRTEAHQDVV   | SRYRTEAHQDVV   |
| 376    | NCOA7       | chr6       | ENST00000368357 | p.E771A  | YYEDEDEAVLPV   | YYEDEDEEVLPV   |
| 377    | NDUFA11     | chr19      | ENST00000308961 | p.T74A   | FGLTACISAHVR   | FGLTTCISAHVR   |
| 378    | NF1         | chr17      | ENST00000356175 | p.K2534N | ISDTKAPNRQEM   | ISDTKAPKRQEM   |
| 379    | NFAM1       | chr22      | ENST00000329021 | p.L112P  | TENQSHTPDCQV   | TENQSHTLDCQV   |
| 380    | NHLH1       | chr1       | ENST00000302101 | p.R99H   | FNLAFAELHKLL   | FNLAFAELRKL    |
| 381    | NINL        | chr20      | ENST00000278886 | p.D371E  | LDNELMTVESAV   | LDNELMTVDSAV   |
| 382    | NOD1        | chr7       | ENST00000222823 | p.W820L  | SISEVGMLGNQV   | SISEVGMWGNQV   |
| 383    | NR1I2       | chr3       | ENST00000337940 | p.V68A   | PGKPSANADEEV   | PGKPSVNADEEV   |
| 384    | NRAS        | chr1       | ENST00000369535 | p.G12C   | EYKLVVVGACGV   | EYKLVVVGAGGV   |
| 385    | NRBF2       | chr10      | ENST00000277746 | p.Y40H   | HKKAAAHLSEAM   | HKKAAAYLSEAM   |
| 386    | NSMCE4A     | chr10      | ENST00000369023 | p.R300H  | FVVDPHSFPHTV   | FVVDPHSFPRTV   |
| 387    | NSUN4       | chr1       | ENST00000474844 | p.L244P  | EPEGDTYDRVLV   | ELEGDTYDRVLV   |
| 388    | NT5C1A      | chr1       | ENST00000235628 | p.A344T  | VAGAQEMGTVTA   | VAGAQEMGTVAA   |
| 389    | NT5DC1      | chr6       | ENST00000319550 | p.V84A   | NFLKLANNGTAL   | NFLKLANNGTVL   |
| 390    | NTN4        | chr12      | ENST00000343702 | p.Y159H  | YKHFATNCSATF   | YKYFATNCSATF   |
| 391    | NUAK2       | chr1       | ENST00000367157 | p.R378H  | LKKSHKENDMAQ   | LKKSrkENDMAQ   |
| 392    | NUP85       | chr17      | ENST00000245544 | p.Y268H  | CERHLQDSTFAT   | CERYLQDSTFAT   |
| 393    | NUTM2F      | chr9       | ENST00000253262 | p.S408Y  | MEELLYHPGDT    | MEELLYSHPGDT   |
| 394    | NXPH3       | chr17      | ENST00000328741 | p.C237F  | KVFPDYNH       | KVCPDYNH       |
| 395    | OBSCN       | chr1       | ENST00000636476 | p.R2408W | VWPPKWLLGKTV   | VRPPKWLLGKTV   |
| 396    | OR10G3      | chr14      | ENST00000303532 | p.A120V  | FLYTLMVYDRYL   | FLYTLMAYDRYL   |
| 397    | OR13D1      | chr9       | ENST00000318763 | p.M33V   | LEHVETRNYSAM   | LEHMRNYSAM     |
| 398    | OR4C16      | chr11      | ENST00000623907 | p.A186F  | QFCSEYVVNLL    | QACSEYVVNLL    |
| 399    | OR5I12      | chr11      | ENST00000341449 | p.R131H  | LHYATVLTTEVI   | LRYATVLTTEVI   |
| 400    | OR5B17      | chr11      | ENST00000357377 | p.M57V   | VYFFLSNLSL     | MYFFLSNLSL     |
| 401    | OSGIN2      | chr8       | ENST00000451899 | p.V42G   | YFGDNLGRKGA    | YFGDNLGRKVA    |
| 402    | P2RX1       | chr17      | ENST00000225538 | p.R25H   | VHNKKVGVIFRL   | VRNKKVGVIFRL   |
| 403    | PAMR1       | chr11      | ENST00000619888 | p.V607G  | WNVLADGRSPGF   | WNVLADVRSPGF   |
| 404    | PARP2       | chr14      | ENST00000250416 | p.T398A  | THSDYAMTLLDL   | THSDYTMTLLDL   |
| 405    | PCDHA5      | chr5       | ENST00000529619 | p.A99V   | RRRVECSIHLEV   | RRRAECSIHLEV   |
| 406    | PCDHA7      | chr5       | ENST00000356878 | p.P183S  | FFLDVSTSNQVQ   | FFLDVPTSNNQV   |
| 407    | PCDHB1      | chr5       | ENST00000306549 | p.E439K  | AETMIKVLISDV   | AETMIEVLISDV   |
| 408    | PCDHGA2     | chr5       | ENST00000394576 | p.A331V  | TRVKVIVTVLDV   | TRAKVIVTVLDV   |
| 409    | PDS5A       | chr4       | ENST00000303538 | p.P103S  | FRIYASEAPYTS   | FRIYAPEAPYTS   |
| 410    | PER2        | chr2       | ENST00000254657 | p.S99N   | CSNDQSSKVDTH   | CSSDQSSKVDTH   |
| 411    | PEX5        | chr12      | ENST00000266563 | p.L381P  | VSFTNESPQRQA   | VSFTNESLQRQA   |
| 412    | PGAP1       | chr2       | ENST00000354764 | p.Y158H  | LKLHKQGEFAPK   | LKLYKQGEFAPK   |
| 413    | PGBD4       | chr15      | ENST00000397766 | p.I462T  | KFFHLLHHTTVL   | KFFHLLHHTVTL   |
| 414    | PGM3        | chr6       | ENST00000512866 | p.E315G  | LVGIGESLNIGV   | LVEIGESLNIGV   |
| 415    | PHB         | chr17      | ENST00000300408 | p.R157Q  | SRQVSDDLTEQA   | SRQVSDDLTERA   |
| 416    | PHF7        | chr3       | ENST00000327906 | p.R362G  | ESSRGRGSYSWR   | ESSRGRRSYSWR   |
| 417    | PIGT        | chr20      | ENST00000279036 | p.Y456H  | EHTPDPNHGFYV   | EYTPDPNHGFYV   |
| 418    | PIK3C2B     | chr1       | ENST00000367187 | p.S480N  | NDDQNPSTLNYL   | NDDQSPSTLNYL   |
| 419    | PIP5K1C     | chr19      | ENST00000335312 | p.A494G  | YDLRGGRSYPTL   | YDLRGARSYPTL   |
| 420    | PITPNM2     | chr12      | ENST00000542749 | p.R1088G | KMVVGGDHTF     | KMVVRGDHTF     |
| 421    | PITPNM2     | chr12      | ENST00000542749 | p.R650C  | SRSNVDIPC      | SRSNVDIPR      |
| 422    | PJA2        | chr5       | ENST00000361189 | p.I160V  | QNGVVHTDSY     | QNGIALVHTDSY   |



| Number | HUGO Symbol | Chromosome | Transcript ID   | HGVSp    | MT Epitope Seq | WT Epitope Seq |
|--------|-------------|------------|-----------------|----------|----------------|----------------|
| 423    | PKD1L2      | chr16      | ENST00000525539 | p.W1855R | GRASSLRRLISM   | GRASSLRWLISM   |
| 424    | PKN1        | chr19      | ENST00000242783 | p.V328A  | ARVVGCRDL      | VRVVGCRDL      |
| 425    | PKP4        | chr2       | ENST00000389757 | p.R521G  | SIQKDPGEFAWR   | SIQKDPREFAWR   |
| 426    | PLA2G4C     | chr19      | ENST00000599921 | p.M98T   | YTNDGDTEALEA   | YTNDGDMEALEA   |
| 427    | PLCB3       | chr11      | ENST00000279230 | p.L310P  | ILPPEALDL      | ILPLEALDL      |
| 428    | PLCH1       | chr3       | ENST00000334686 | p.P1056H | HVVNPTQDL      | PVVNPTQDL      |
| 429    | PLEKHG3     | chr14      | ENST00000247226 | p.S700P  | RPSCKKKESALS   | RSSCKKKESALS   |
| 430    | PLOD3       | chr7       | ENST00000223127 | p.R181C  | TIHQIVCQWKYK   | TIHQIVRQWKYK   |
| 431    | PLPP3       | chr1       | ENST00000371250 | p.R107Q  | IITGEFYQIYYL   | IITGEFYRIYYL   |
| 432    | PLXNC1      | chr12      | ENST00000258526 | p.R1417C | SLPLCFWVNILK   | SLPLRFWVNILK   |
| 433    | PLXNC1      | chr12      | ENST00000549217 | p.S403L  | LSTKPSSLLGK    | LSTKPSSLLGK    |
| 434    | PMF1        | chr1       | ENST00000368277 | p.Y140C  | APCFLQQRDTLR   | APYFLQQRDTLR   |
| 435    | PNPT1       | chr2       | ENST00000447944 | p.R26W   | PRWDRALTQLQV   | PRRDRALTQLQV   |
| 436    | POLD2       | chr7       | ENST00000452185 | p.R255G  | HSTQSGDSI      | HSTQSRDSI      |
| 437    | POLE        | chr12      | ENST00000320574 | p.Y539C  | DDGHVLDSETCV   | DDGHVLDSETYV   |
| 438    | POLQ        | chr3       | ENST00000264233 | p.C1475W | GVEGEWLPVPET   | GVEGECLPVPET   |
| 439    | POLR2A      | chr17      | ENST00000617998 | p.R967G  | MREDREVLGVIF   | MREDREVLRVIF   |
| 440    | POU5F2      | chr5       | ENST00000606183 | p.R166H  | QTTICHFEAQQ    | QTTICRFEAQQ    |
| 441    | PPRC1B      | chr5       | ENST00000309241 | p.L775P  | ETAPEEEDL      | ETALEEEDL      |
| 442    | PPFIA1      | chr11      | ENST00000253925 | p.S458P  | TVDKLLSEPNER   | TVDKLLSESNER   |
| 443    | PIIH        | chr1       | ENST00000304979 | p.V140L  | VLFGKIIDGLLV   | VVFGKIIDGLLV   |
| 444    | PPM1M       | chr3       | ENST00000323588 | p.R32G   | SPVPYGRPRFLR   | SPVPYRRPRFLR   |
| 445    | PPP1R27     | chr17      | ENST00000330261 | p.R16Q   | ARYSPRQRRRM    | ARYSPRQRRRM    |
| 446    | PPP4R1      | chr18      | ENST00000400555 | p.H211R  | EMCCDCRMFVR    | EMCCDCRMFVR    |
| 447    | PPP6R1      | chr19      | ENST00000412770 | p.D381V  | LALVVPNTMLDL   | LALDVPNTMLDL   |
| 448    | PRDM16      | chr1       | ENST00000270722 | p.V17I   | LAKSDGDIVNNM   | LAKSDGDVVNNM   |
| 449    | PRDX2       | chr19      | ENST00000301522 | p.E27D   | KDVKLSDYKGY    | KEVKLSDYKGY    |
| 450    | PRDX3       | chr10      | ENST00000298510 | p.G80R   | NREFKDSLDDF    | NGEFKDSLDDF    |
| 451    | PRKCZ       | chr1       | ENST00000378567 | p.W296G  | ELVHDEDEDIGV   | ELVHDEDEDIWV   |
| 452    | PRKDC       | chr8       | ENST00000314191 | p.Y3413C | PAAGVIDACMTL   | PAAGVIDAYMTL   |
| 453    | PRLHR       | chr10      | ENST00000239032 | p.V316M  | PYAFGLMQLL     | PYAFGLVQLL     |
| 454    | PRMT6       | chr1       | ENST00000370078 | p.T142S  | RVHVLPGPVESV   | RVHVLPGPVETV   |
| 455    | PRMT7       | chr16      | ENST00000441236 | p.R363C  | ERVRQMCPVDC    | ERVRQMRPVDC    |
| 456    | PRMT9       | chr4       | ENST00000322396 | p.V308A  | AAECAEIRRHHR   | AVECAEIRRHHR   |
| 457    | PCR         | chr20      | ENST00000216968 | p.Y44C   | FRDPYHWC       | FRDPYHVWY      |
| 458    | PS3         | chr19      | ENST00000396908 | p.T167I  | TAVPTAVNVISA   | TAVPTAVNV TSA  |
| 459    | PRPF19      | chr11      | ENST00000227524 | p.S503G  | DRSLKFYGL      | DRSLKFYSL      |
| 460    | PRRC2C      | chr1       | ENST00000426496 | p.D162G  | TNDGNYGPGPSL   | TNDDNYGPGPSL   |
| 461    | PRRT4       | chr7       | ENST00000489835 | p.P129L  | RASSLLESTSR    | RASSLLPESTSR   |
| 462    | PSD         | chr10      | ENST0000020673  | p.G198A  | SLPNGLGAPPER   | SLPNGLGGPPER   |
| 463    | PTCD2       | chr5       | ENST00000308077 | p.K131E  | FTLGEYEFGPLF   | FTLGEYKFGPLF   |
| 464    | PTCD3       | chr2       | ENST00000254630 | p.N455D  | FIGPDQHRDFYY   | FIGPDQHRNFYY   |
| 465    | PTGER3      | chr1       | ENST00000306666 | p.V201I  | QYTIQWPGTWCF   | QYTVQWPGTWCF   |
| 466    | PTPN3       | chr9       | ENST00000412145 | p.P706S  | VRSLRVDSESVL   | VRSLRVDSEPVL   |
| 467    | PTPRG       | chr3       | ENST00000295874 | p.M1392V | STKENGNGPVTV   | STKENGNGPMTV   |
| 468    | PTPRJ       | chr11      | ENST00000418331 | p.W474R  | ARSSHDAESFQM   | AWSSHDAESFQM   |
| 469    | PWWP2A      | chr5       | ENST00000307063 | p.S584C  | ASVCCIDSTDDL   | ASVCSIDSTDDL   |
| 470    | PXDN        | chr2       | ENST00000252804 | p.D828G  | GQFLDHGLDSTV   | GQFLDHGLDSTV   |
| 471    | PXK         | chr3       | ENST00000383716 | p.F515L  | STSVEHAPL      | STSVEHAPF      |
| 472    | RAB38       | chr11      | ENST00000243662 | p.L61P   | RPQLWDIAGQER   | RLQLWDIAGQER   |
| 473    | RAB3GAP2    | chr1       | ENST00000358951 | p.P470T  | RVAQFLVIYATR   | RVAQFLVIYAPR   |
| 474    | RAB3GAP2    | chr1       | ENST00000358951 | p.A1130V | PVLDTEDVWLSV   | PVLDTEDAWLSV   |
| 475    | RASGRP2     | chr11      | ENST00000354024 | p.F435L  | IEKMVESVLRNF   | IEKMVESVFRNF   |

| Number | HUGO Symbol | Chromosome | Transcript ID   | HGVSp    | MT Epitope Seq | WT Epitope Seq |
|--------|-------------|------------|-----------------|----------|----------------|----------------|
| 476    | RBL1        | chr20      | ENST00000344359 | p.T719A  | VAIPLHGVANDA   | VTIPLHGVANDA   |
| 477    | RD3         | chr1       | ENST00000367002 | p.I159T  | RARTSPFASDIR   | RARISPFASDIR   |
| 478    | RECQL4      | chr8       | ENST00000617875 | p.A889V  | LSHQVAPGPRRV   | LSHQAAPGPRRV   |
| 479    | RECQL5      | chr17      | ENST00000423245 | p.I47T   | ATMAVVKGITTV   | ATMAVVKGITIV   |
| 480    | RECQL5      | chr17      | ENST00000317905 | p.I74T   | LPALLAKGITTV   | LPALLAKGITIV   |
| 481    | REST        | chr4       | ENST00000309042 | p.P479A  | KKNNVSVIQV     | KKPSNNVSVIQV   |
| 482    | RET         | chr10      | ENST00000340058 | p.R180Q  | FRIRENQPPGTF   | FRIRENRPPGTF   |
| 483    | RHO         | chr3       | ENST00000296271 | p.Y30C   | QYCLAEPWQF     | QYYLAEPWQF     |
| 484    | RIC1        | chr9       | ENST00000251879 | p.T79A   | YKQAEWRPDSAM   | YKQAEWRPDSTM   |
| 485    | RIC1        | chr9       | ENST00000251879 | p.I774V  | QRIMLPFHVNIY   | QRIMLPFHINIY   |
| 486    | RIOK3       | chr18      | ENST00000339486 | p.V59A   | VFPEAAVAEGPF   | VFPEVAVAEGPF   |
| 487    | RNF126      | chr19      | ENST00000292363 | p.N248S  | RQLPCSHLF      | RQLPCNHLF      |
| 488    | RNF208      | chr9       | ENST00000391553 | p.M33T   | MEATKIVHPEKF   | MEAMKIVHPEKF   |
| 489    | RNF26       | chr11      | ENST00000311413 | p.S125G  | VVSGGHALLRQA   | VVSSGHALLRQA   |
| 490    | RNPEP       | chr1       | ENST00000295640 | p.T309A  | FVAPCLLAGDRS   | FVTPCLLAGDRS   |
| 491    | ROR1        | chr1       | ENST00000371079 | p.V145A  | KEVVSSTGALFV   | KEVVSSTGVLV    |
| 492    | RPAP2       | chr1       | ENST00000610020 | p.A85T   | RFITPTHYSVV    | RFITPAHYSVV    |
| 493    | RPS6KA4     | chr11      | ENST00000334205 | p.L531I  | VHRDIKPENILY   | VHRDLKPENILY   |
| 494    | RPS6KB1     | chr17      | ENST00000225577 | p.V96A   | FELLRALGKGGY   | FELLRVLGKGGY   |
| 495    | RPS6KB1     | chr17      | ENST00000225577 | p.D393N  | TRQTPVNSPDDS   | TRQTPVDSPDDS   |
| 496    | RRBP1       | chr20      | ENST00000246043 | p.E1222D | YAKDVAGLRQLL   | YAKEVAGLRQLL   |
| 497    | RYR1        | chr19      | ENST00000355481 | p.M4985T | EHNLANYTFFLM   | EHNLANYMFFLM   |
| 498    | RYR1        | chr19      | ENST00000355481 | p.A4295P | GATARVVAPAGR   | GATARVVAAGR    |
| 499    | RYR2        | chr1       | ENST00000366574 | p.N3085D | QFTHTRDQPKG    | QFTHTRNQPKG    |
| 500    | SAP18       | chr13      | ENST00000382533 | p.V70A   | FSRGNAPSELQ    | FSRGNVPSELQ    |
| 501    | SASS6       | chr1       | ENST00000287482 | p.V324A  | EKHVNQLQTKAA   | EKHVNQLQTKVA   |
| 502    | SCN11A      | chr3       | ENST00000668754 | p.E415D  | EIDAKEKMFQEA   | EIEAKEKMFQEA   |
| 503    | SCN2A       | chr2       | ENST00000283256 | p.R684W  | RWSSSYHVSMDL   | RRSSSYHVSMDL   |
| 504    | SCN4A       | chr17      | ENST00000435607 | p.A459T  | NEATLTEDKEKE   | NEATLAEDKEKE   |
| 505    | SCUBE2      | chr11      | ENST00000450649 | p.Y726C  | GNSRFQVPCV     | GNSRFQVPYV     |
| 506    | SEL1L       | chr14      | ENST00000336735 | p.Y299N  | LGNRYWAGIGVL   | LGRYWAGIGVL    |
| 507    | SELENOS     | chr15      | ENST00000398226 | p.Y45C   | FSCILLCVFQK    | FSCILLYVVFQK   |
| 508    | SELPLG      | chr12      | ENST00000550948 | p.Y51H   | YEYLDHDFLPET   | YEYLDYDFLPET   |
| 509    | SELPLG      | chr12      | ENST00000550948 | p.T254A  | AQTAPLAAM      | AQTTPLAAM      |
| 510    | SEMA6C      | chr1       | ENST00000341697 | p.W103R  | TRRSQDVENCAV   | TWRSQDVENCAV   |
| 511    | SEPHS1      | chr10      | ENST00000327347 | p.E374K  | ARIIDKPRIKV    | ARIIDKPRIEV    |
| 512    | SEPTIN7     | chr7       | ENST00000432293 | p.R52H   | EAQHKELEEKHR   | EAQHKELEEKRR   |
| 513    | SPINC1      | chr1       | ENST00000367698 | p.M283V  | SVMYQEGKFRYR   | SMMYQEGKFRYR   |
| 514    | STAD2       | chr2       | ENST00000313349 | p.Q147R  | TFCTSRAMQPTA   | TFCTSQAMQPTA   |
| 515    | SEZ6L       | chr22      | ENST00000248933 | p.A192V  | WLDRKESVVPTT   | WLDRKESAVPTT   |
| 516    | SHC4        | chr15      | ENST00000332408 | p.R432G  | EQSGAIGNVHPR   | EQSRAIGNVHPR   |
| 517    | SHA6        | chr17      | ENST00000409168 | p.A456T  | NSYTTLGQSQTA   | NSYATLGQSQTA   |
| 518    | SHKBP1      | chr19      | ENST00000291842 | p.G310R  | LIATSHTGRIRV   | LIATSHTGRIGV   |
| 519    | SLC12A4     | chr16      | ENST00000316341 | p.L558P  | TWAPLLTALI     | TWALLLTALI     |
| 520    | SLC16A4     | chr1       | ENST00000369779 | p.L178H  | AHILFGAIALNL   | ALILFGAIALNL   |
| 521    | SLC22A4     | chr5       | ENST00000200652 | p.A310T  | NIAVPTVIFDSV   | NIAVPAVIFDSV   |
| 522    | SLC22A5     | chr5       | ENST00000245407 | p.I551T  | MLKDGQERPTTL   | MLKDGQERPTIL   |
| 523    | SLC25A3     | chr12      | ENST00000188376 | p.E238D  | FACFDRTVEALY   | FACFERTVEALY   |
| 524    | SLC26A6     | chr3       | ENST00000358747 | p.L650I  | FHSIILDGALS    | FHSLILDGALS    |
| 525    | SLC26A9     | chr1       | ENST00000340781 | p.M588T  | QRRSLFTKTKTV   | QRRSLFMKTKTV   |
| 526    | SLC2A4RG    | chr20      | ENST00000266077 | p.V363M  | CRKMYGMERRDL   | CRKVYGMERRDL   |
| 527    | SLC30A10    | chr1       | ENST00000366926 | p.V285A  | QCYIDPSLTALM   | QCYIDPSLTVLM   |
| 528    | SLC30A7     | chr1       | ENST00000357650 | p.V237A  | QGAFLHILADTL   | QGVFLHILADTL   |

| Number | HUGO Symbol | Chromosome | Transcript ID   | HGVSp    | MT Epitope Seq | WT Epitope Seq |
|--------|-------------|------------|-----------------|----------|----------------|----------------|
| 529    | SLC9A1      | chr1       | ENST00000263980 | p.H120R  | GFRVIPTISSIV   | GFHVIPITISSIV  |
| 530    | SMARCC2     | chr12      | ENST00000267064 | p.I912T  | FEELETTMDRER   | FEELETIMDRER   |
| 531    | SMG8        | chr17      | ENST00000300917 | p.S476T  | ELTTKILSSIKV   | ELTSKILSSIKV   |
| 532    | SMIM29      | chr6       | ENST00000636500 | p.Y44C   | RWCMAGR VATST  | RWYMAGR VATST  |
| 533    | SNTA1       | chr20      | ENST00000217381 | p.M219I  | HMSLKIAYVSKR   | HMSLKMAYVSKR   |
| 534    | SON         | chr21      | ENST00000300278 | p.R1986H | RTPSRRSHTPSR   | RTPSRRSRTPSR   |
| 535    | SORCS3      | chr10      | ENST00000369701 | p.R678H  | FSLHSEWQLVKV   | FSLRSEWQLVKV   |
| 536    | SPAG5       | chr17      | ENST00000321765 | p.W645R  | LQQDRRSMQLDY   | LQQDWRSMQLDY   |
| 537    | SPDYE1      | chr7       | ENST00000258704 | p.Q319R  | VSPEELEIRAY    | VSPEELEIQAY    |
| 538    | SPOP        | chr17      | ENST00000393328 | p.G49D   | NFSFCREEMDEV   | NFSFCREEMGEV   |
| 539    | SPPL2A      | chr15      | ENST00000261854 | p.A12V   | QRRLSPAGVL     | QRRLSPAGAALL   |
| 540    | SPSB1       | chr1       | ENST00000328089 | p.R36Q   | CKPTQLDLLLDM   | CKPTRLDLLLDM   |
| 541    | SPSB2       | chr12      | ENST00000523102 | p.S126N  | GNNSESWGWDIG   | GSNSESWGWDIG   |
| 542    | SPTA1       | chr1       | ENST00000643759 | p.P339H  | SHPSDAHQIQEM   | SHPSDAPQIQEM   |
| 543    | SPTAN1      | chr9       | ENST00000358161 | p.M988T  | EVTTKKGDILT    | EVTMKKGDILT    |
| 544    | SPTBN5      | chr15      | ENST00000320955 | p.A2200V | FEAEVQVHEEVM   | FEAEVQAHEEVM   |
| 545    | SRPRA       | chr11      | ENST00000332118 | p.R401H  | ILQPQHRVDMLR   | ILQPQRRVDMLR   |
| 546    | SSC5D       | chr19      | ENST00000389623 | p.S1396P | SRPSTATSM      | SRSSTATSM      |
| 547    | SSH2        | chr17      | ENST00000269033 | p.Y411C  | MKECGWNLDRAY   | MKEYGWNLDRAY   |
| 548    | SSX3        | chrX       | ENST00000298396 | p.S155C  | INMICGPKRGEH   | INMISGPKRGEH   |
| 549    | STEAP3      | chr2       | ENST00000393106 | p.M185T  | MATGFMPVDM     | MAMGFMPVDM     |
| 550    | STRBP       | chr9       | ENST00000348403 | p.M15V   | DRHV VVKHSTIY  | DRHVMVKHSTIY   |
| 551    | SUCO        | chr1       | ENST00000263688 | p.V1000A | LSATAAELKREV   | LSATVAELKREV   |
| 552    | SUPT6H      | chr17      | ENST00000314616 | p.E1406K | FKDLDEIVARYV   | FEDLDEIVARYV   |
| 553    | SUSD1       | chr9       | ENST00000374264 | p.R246Q  | GNPPEMQHAILV   | GNPPEMRHAILV   |
| 554    | SV2A        | chr1       | ENST00000369146 | p.A653D  | FGNSESAMIDLL   | FGNSESAMIALL   |
| 555    | SYNE1       | chr6       | ENST00000367251 | p.R1124C | LRRYCQEVFGCV   | LRRYCQEVFGRV   |
| 556    | TAF6L       | chr11      | ENST00000294168 | p.M600V  | RYVQKLPVI      | RYVQKLPMI      |
| 557    | TANC2       | chr17      | ENST00000424789 | p.R1287Q | FQELKVSLLLNL   | FRELKVSLLLNL   |
| 558    | TATDN2      | chr3       | ENST00000287652 | p.C30S   | RKRSCLEPSDV    | RKRSCLEPCDV    |
| 559    | TBC1D9B     | chr5       | ENST00000356834 | p.Y857C  | LEQCRIDASQFR   | LEQYRIDASQFR   |
| 560    | TBKB1       | chr17      | ENST00000361722 | p.A297V  | VYTELTEL       | AYTELTEL       |
| 561    | TBL3        | chr16      | ENST00000332704 | p.V608I  | LRFCITWNTNSR   | LRFCVTWNTNSR   |
| 562    | TCF25       | chr16      | ENST00000263346 | p.V546A  | NRRKALYQRAPR   | NRRKVLYQRAPR   |
| 563    | TDRD7       | chr9       | ENST00000355295 | p.R830C  | KNFPDPHCSINR   | KNFPDPHRSINR   |
| 564    | TEAD3       | chr6       | ENST00000338863 | p.R85W   | YIKLRTGKTWTR   | YIKLRTGKTRTR   |
| 565    | TESK2       | chr1       | ENST00000372084 | p.S448L  | LLSDGPPPR      | SLSDGPPPR      |
| 566    | TET3        | chr2       | ENST00000409262 | p.E1564G | KLWNP MKGEGGF  | KLWNP MKGEEGR  |
| 567    | TGM2        | chr20      | ENST00000361475 | p.R651K  | EAGEEVKVKMDL   | EAGEEVKVRMDL   |
| 568    | TGM2        | chr20      | ENST00000361475 | p.V604M  | EPKQKRKLMAEV   | EPKQKRKLVAEV   |
| 569    | TGM5        | chr15      | ENST00000220420 | p.L610Q  | EKIQV NKIITLS  | EKILV NKIITLS  |
| 570    | THEM5       | chr1       | ENST00000368817 | p.P195H  | FKNLIHVDSL VV  | FKNLIPVDSL VV  |
| 571    | THOC1       | chr18      | ENST00000261600 | p.A90T   | TTSTPFVLLGDV   | TASTPFVLLGDV   |
| 572    | TICRR       | chr15      | ENST00000560985 | p.E1803D | REDSEVSKSKDG   | REDSEVSKSKEG   |
| 573    | TIGD6       | chr5       | ENST00000296736 | p.T43A   | ITPSALSTF      | ITPSTLSTF      |
| 574    | TIMM44      | chr19      | ENST00000270538 | p.D238E  | KESK WYQQWKDF  | KDSK WYQQWKDF  |
| 575    | TJP2        | chr9       | ENST00000348208 | p.R689C  | DFWRMCGQRSGV   | DFWRMRGQRSGV   |
| 576    | TLN2        | chr15      | ENST00000472902 | p.A226T  | VGGMVDAITEAM   | VGGMVDAIAEAM   |
| 577    | TMCO4       | chr1       | ENST00000294543 | p.T30M   | LPMGRELTEANR   | LPTGRELTEANR   |
| 578    | TMEM145     | chr19      | ENST00000673187 | p.S327L  | YELPAGYGLIGL   | YESPAGYGLIGL   |
| 579    | TMEM171     | chr5       | ENST00000454765 | p.V31I   | IFCFFVFGAILL   | IFCFFVFGAVLL   |
| 580    | TMEM201     | chr1       | ENST00000340305 | p.T23M   | GVMACAAAGVLL   | GVTACAAAGVLL   |
| 581    | TMEM259     | chr19      | ENST00000333175 | p.Y209H  | KVWPQDEHIVEY   | KVWPQDEYIVEY   |

| Number | HUGO Symbol | Chromosome | Transcript ID   | HGVSp    | MT Epitope Seq | WT Epitope Seq |
|--------|-------------|------------|-----------------|----------|----------------|----------------|
| 582    | TMEM26      | chr10      | ENST00000399298 | p.Y36H   | RHWLLALLNLLL   | RYWLLALLNLLL   |
| 583    | TMPRSS12    | chr12      | ENST00000398458 | p.V106I  | KYGRVLVHI      | KYGRVLVHV      |
| 584    | TMX2        | chr11      | ENST00000278422 | p.Q262R  | NLNELYRRAKKL   | NLNELYQRAKKL   |
| 585    | TNFAIP2     | chr14      | ENST00000333007 | p.L447M  | QNWQVPQDTMSI   | QNWQVPQDTLSL   |
| 586    | TOMM40L     | chr1       | ENST00000367987 | p.P27H   | RREEPLPNH      | RREEPLPNP      |
| 587    | TOPBP1      | chr3       | ENST00000260810 | p.K959E  | YESVKERGVHIV   | YKSVKERGVHIV   |
| 588    | TP63        | chr3       | ENST00000264731 | p.A139T  | YNTDHTQNSVTA   | YNTDHAQNSVTA   |
| 589    | TRANK1      | chr3       | ENST00000645898 | p.Y1688H | LHTAITRARVNL   | LYTAITRARVNL   |
| 590    | TRHDE       | chr12      | ENST00000261180 | p.R770H  | ALYPLDKLLDHM   | ALYPLDKLLDRM   |
| 591    | TRIM14      | chr9       | ENST00000341469 | p.Y341C  | WVGAACASLRRR   | WVGAAYASLRRR   |
| 592    | TRNAU1AP    | chr1       | ENST00000373830 | p.G8V    | ASLWMVDLEPYM   | ASLWMGDLEPYM   |
| 593    | WM6         | chr9       | ENST00000360774 | p.V1847E | IYTFNQEKQTI    | IYTFNQVKQTI    |
| 594    | WV1         | chr17      | ENST00000310522 | p.V288A  | ARDSVGN TALHA  | ARDSVGN TVLHA  |
| 595    | TTC13       | chr1       | ENST00000366661 | p.H440R  | SRYLRAHLDTPL   | SRYLHAHLDTPL   |
| 596    | TTC30A      | chr2       | ENST00000355689 | p.H640Y  | IEQPLEEERMYV   | IEQPLEEERMHV   |
| 597    | TTLL7       | chr1       | ENST00000474957 | p.L448V  | NVYRIFNRVFN    | NLYRIFNRVFN    |
| 598    | UBQLN4      | chr1       | ENST00000368309 | p.P12S   | GAEWSIRVTV     | GAEWPIRVTV     |
| 599    | UBR5        | chr8       | ENST00000220959 | p.L1398S | CTADILLSDTLL   | CTADILLDTLL    |
| 600    | ULBP1       | chr6       | ENST00000229708 | p.E51G   | PKSRPEPQWCGV   | PKSRPEPQWCEV   |
| 601    | UMODL1      | chr21      | ENST00000400421 | p.A59T   | GNTSTTVSRLLL   | GNASTTVSRLLL   |
| 602    | UMODL1      | chr21      | ENST00000468982 | p.R91H   | WEHLHHSVAAAT   | WERLHHSVAAAT   |
| 603    | UNC13B      | chr9       | ENST00000378495 | p.S892F  | ERLQDLKFTVDL   | ERLQDLKSTVDL   |
| 604    | UNC5B       | chr10      | ENST00000335350 | p.V243I  | RRSTTATVVIYV   | RRSTTATVIVYV   |
| 605    | UNCX        | chr7       | ENST00000316333 | p.N176S  | GRPAHSSHPTTC   | GRPAHNSHPTTC   |
| 606    | UQCRC2      | chr16      | ENST00000268379 | p.H310R  | GSNTTSHLRQAV   | GSNTTSHLHQAV   |
| 607    | UQCRHL      | chr1       | ENST00000483273 | p.R49Q   | AREQLELYDEHV   | ARERLELYDEHV   |
| 608    | USH2A       | chr1       | ENST00000307340 | p.A416V  | QYFVRNCGAF     | QYFARNCGAF     |
| 609    | USP14       | chr18      | ENST00000261601 | p.V89I   | EPSAKTVFIEDM   | EPSAKTVFVEDM   |
| 610    | USP18       | chr22      | ENST00000215794 | p.R119W  | SRQKAVWPL      | SRQKAVRPL      |
| 611    | USP19       | chr3       | ENST00000398888 | p.V682A  | KQKALPVFYFAR   | KQKVLPVFYFAR   |
| 612    | USP36       | chr17      | ENST00000449938 | p.V271A  | YLDAALEIRQAA   | YLDVEIRQAA     |
| 613    | UST         | chr6       | ENST00000367463 | p.E160A  | IKNISTAAQPYL   | IKNISTAEQPYL   |
| 614    | VD          | chr19      | ENST00000245932 | p.Q31L   | RWLPAGTGPLAF   | RWLPAGTGPQAF   |
| 615    | VGLL2       | chr6       | ENST00000326274 | p.R307H  | ARHYSLCGASLL   | ARRYSLCGASLL   |
| 616    | VPS13A      | chr9       | ENST00000360280 | p.P1902H | SDSFSVLNIHMA   | SDSFSVLNIPMA   |
| 617    | VPS8        | chr3       | ENST00000287546 | p.L455P  | VYNSSHFKSPAT   | VYNSSHFKSLAT   |
| 618    | VSIG10      | chr12      | ENST00000359236 | p.Y251C  | CRWDGGCPDPDF   | CRWDGGYPDPDF   |
| 619    | VWDE        | chr7       | ENST00000452576 | p.L694S  | NSFLQEKKHINL   | NLFLQEKKHINL   |
| 620    | VXN         | chr8       | ENST00000305454 | p.A79V   | DRRRFGRLQTVR   | DRRRFGRLQTAR   |
| 621    | WDFY2       | chr13      | ENST00000298125 | p.N368S  | HSIVHVHFDATR   | HNIVHVHFDATR   |
| 622    | WDR18       | chr19      | ENST00000585809 | p.F136L  | SHLISGGKDCLV   | SHFISGGKDCLV   |
| 623    | WDR24       | chr16      | ENST00000293883 | p.Q685R  | YTSYIDLRRFR    | YTSYIDLLQRF    |
| 624    | WDR81       | chr17      | ENST00000409644 | p.L1877M | FDMYGSEVVTGT   | FDLYGSEVVTGT   |
| 625    | WDR83       | chr19      | ENST00000418543 | p.D212G  | CTLVSSLGSTLR   | CTLVSSLDSTLR   |
| 626    | WIPI2       | chr7       | ENST00000288828 | p.A174E  | LEYPGSATIGEV   | LAYPGSATIGEV   |
| 627    | XDH         | chr2       | ENST00000379416 | p.R1176C | HKNLCTDIVMDV   | HKNLRTDIVMDV   |
| 628    | XIAP        | chrX       | ENST00000371199 | p.G232D  | NCFVLDRLNLI    | NCFVLRNLI      |
| 629    | XPNPEP1     | chr10      | ENST00000322238 | p.G42D   | GVETDDRMPPKV   | GVETDGRMPPKV   |
| 630    | YBX1        | chr1       | ENST00000436427 | p.P73L   | GPAPRACLGAPR   | GPAPRACPGAPR   |
| 631    | ZBTB21      | chr21      | ENST00000310826 | p.K773E  | CEYEKLTCLCEM   | CEYKLTCLCEM    |
| 632    | ZBTB34      | chr9       | ENST00000319119 | p.V135I  | HSKISIGDVDSV   | HSKISVGDVDSV   |
| 633    | ZCCHC7      | chr9       | ENST00000534928 | p.K459T  | ETKADRHREV     | EKHRKADRHREV   |
| 634    | ZFP14       | chr19      | ENST00000270001 | p.L411H  | SSYSQHHQSI     | SSYSQLISHQSI   |

| Number | HUGO Symbol | Chromosome | Transcript ID   | HGVSp   | MT Epitope Seq | WT Epitope Seq |
|--------|-------------|------------|-----------------|---------|----------------|----------------|
| 635    | ZFP28       | chr19      | ENST00000301318 | p.S760N | ECNVCGKAFSHR   | ECSVCGKAFSHR   |
| 636    | ZGLP1       | chr19      | ENST00000403903 | p.R128W | SAPPQRRPW      | SAPPQRRPR      |
| 637    | ZMYM6       | chr1       | ENST00000357182 | p.A219T | QNVVHGLCSDTC   | QNVVHGLCSDAC   |
| 638    | ZMYM6       | chr1       | ENST00000357182 | p.R402H | IHGSAASL       | IRGSAASL       |
| 639    | ZNF213      | chr16      | ENST00000396878 | p.N234S | KRESSRNTTLGF   | KRENSRNTTLGF   |
| 640    | ZNF236      | chr18      | ENST00000253159 | p.A261T | ACAFCPATF      | ACAFCPAAF      |
| 641    | ZNF438      | chr10      | ENST00000331737 | p.D2Y   | MYSESNIPSGTI   | MSESNIPSGTI    |
| 642    | ZNF469      | chr16      | ENST00000565624 | p.F705S | EVGRGGLQGSPR   | EVGRGGLQGFPR   |
| 643    | ZNF500      | chr16      | ENST00000589422 | p.P44H  | DHSPETFRQLFR   | DPSPETFRQLFR   |
| 644    | ZNF611      | chr19      | ENST00000595798 | p.C418Y | EYGKTFGQNSDL   | ECGKTFGQNSDL   |
| 645    | ZNF628      | chr19      | ENST00000391718 | p.T686M | LPHLQAMLSLEV   | LPHLQATLSLEV   |
| 646    | ZNF7        | chr8       | ENST00000446747 | p.V43A  | YREAMLENHSSV   | YREVMLENHSSV   |
| 647    | ZNF791      | chr19      | ENST00000343325 | p.R111H | FMHLSSLTRHMR   | FMRLSSLTRHMR   |
| 648    | ZNRF3       | chr22      | ENST00000406323 | p.T285A | TRASMDSHGNPV   | TRTSMDSHGNPV   |
| 649    | ZNRF4       | chr19      | ENST00000222033 | p.R177H | TFDLKVLNAQHA   | TFDLKVLNAQRA   |
| 650    | ZSWIM8      | chr10      | ENST00000603187 | p.R719Q | NPNEIQQALVQC   | NPNEIQRALVQC   |
| 651    | ZSWIM9      | chr19      | ENST00000328759 | p.A312T | VRQLLPCTRVQI   | VRQLLPCTRVQI   |
| 652    | ZZEF1       | chr17      | ENST00000381638 | p.C162Y | AYSLVPGFTDIF   | ACSLVPGFTDIF   |
