# Supplementary material for: Stimulating T cell responses against patient-derived breast cancer cells with neoantigen peptide-loaded peripheral blood mononuclear cells
Source: Springer Nature journal article supplement (doi:10.1007/s00262-024-03627-3), 2024-02-13
Supplement: MOESM9 [file 26729214]

Supplementary Table S5a. List of candidate neoantigens of PC-B-142CA

| No. | Gene Name | HLA Allele  | HGVSp    | MT Epitope Seq | WT Epitope Seq | Best IC <sub>50</sub> MT algorithm | Best IC <sub>50</sub> MT (nM) | IC <sub>50</sub> corresponding WT (nM) | Corresponding Fold Change |
|-----|-----------|-------------|----------|----------------|----------------|------------------------------------|-------------------------------|----------------------------------------|---------------------------|
| 1   | ADGRL1    | HLA-A*11:01 | p.E274K  | KTDIDLAVDK     | KTDIDLAVDE     | NetMHC                             | 38.97                         | 24602.85                               | 631.33                    |
| 2   | AHCYL2    | HLA-A*11:01 | p.E555K  | ALIELYNAPK     | ALIELYNAPE     | MHCflurry                          | 19.92                         | 5064.81                                | 254.31                    |
| 3   | WNK4      | HLA-B*54:01 | p.P87A   | SPAPDPPDPA     | SPAPDPPDPP     | MHCnuggetsI                        | 52.65                         | 11855.12                               | 225.15                    |
| 4   | ATP5F1B   | HLA-A*11:01 | p.E448K  | AILGMDELSK     | AILGMDELSE     | MHCflurry                          | 20.93                         | 3508.97                                | 167.68                    |
| 5   | PARP1     | HLA-A*11:01 | p.E619K  | AIEHFMKLYK     | AIEHFMKLYE     | MHCflurry                          | 13.35                         | 2110.72                                | 158.16                    |
| 6   | HIST1H3C  | HLA-A*11:01 | p.E98K   | AVMALQEACK     | AVMALQEACE     | MHCflurry                          | 15.91                         | 2514.79                                | 158.03                    |
| 7   | CRLF3     | HLA-A*11:01 | p.E72K   | GTLGKLLDK      | GTLGKLLDE      | MHCflurry                          | 18.00                         | 2681.04                                | 148.94                    |
| 8   | TBC1D17   | HLA-A*11:01 | p.E76K   | SSGGDSCASK     | SSGGDSCASE     | MHCflurry                          | 57.47                         | 8406.15                                | 146.26                    |
| 9   | TAX1BP1   | HLA-B*54:01 | p.P724A  | CPMCSEQFPA     | CPMCSEQFPP     | MHCnuggetsI                        | 5.95                          | 790.24                                 | 132.87                    |
| 10  | PPP1R9B   | HLA-A*11:01 | p.E216K  | TVSQLSAVFK     | TVSQLSAVFE     | MHCflurry                          | 10.18                         | 725.24                                 | 71.27                     |
| 11  | ATIC      | HLA-A*11:01 | p.E347K  | VSDGIIAPGYK    | VSDGIIAPGYE    | SMM                                | 50.13                         | 2512.47                                | 50.12                     |
| 12  | HK1       | HLA-A*11:01 | p.P179V  | SVVEGADVVK     | SGVEGADVVK     | MHCflurry                          | 29.39                         | 1130.03                                | 38.45                     |
| 13  | SEC14L2   | HLA-A*11:01 | p.R43Q   | LQARSFDLQK     | LRARSFDLQK     | MHCnuggetsI                        | 118.43                        | 3646.32                                | 30.79                     |
| 14  | TFIP11    | HLA-A*24:02 | p.S691L  | WYLGWKSML      | WYLGWKSMS      | MHCflurry                          | 45.88                         | 1397.25                                | 30.45                     |
| 15  | IFT88     | HLA-A*11:01 | p.D684H  | HTYKDTHRK      | DTYKDTHRK      | MHCflurry                          | 21.60                         | 178.87                                 | 8.28                      |
| 16  | G3BP1     | HLA-A*11:01 | p.P124L  | KLYVHNDIFR     | KFYVHNDIFR     | MHCflurry                          | 94.68                         | 681.65                                 | 7.20                      |
| 17  | FLNA      | HLA-A*24:02 | p.E2056Q | TFQPAEFII      | TFEPAEFII      | MHCflurry                          | 122.91                        | 690.21                                 | 5.62                      |
| 18  | GLRX3     | HLA-A*11:01 | p.S94P   | FLFFKNFQK      | FLFFKNSQK      | NetMHC                             | 24.43                         | 105.72                                 | 4.33                      |
| 19  | MAP1LC3B  | HLA-A*11:01 | p.E18Q   | RVQDVRLIR      | RVEDVRLIR      | MHCnuggetsI                        | 61.05                         | 264.15                                 | 4.33                      |
| 20  | CC2D1A    | HLA-A*24:02 | p.E639Q  | RFQQRFSVI      | RFEQRFSVI      | MHCflurry                          | 34.76                         | 115.55                                 | 3.32                      |
| 21  | FCSK      | HLA-A*24:02 | p.E208Q  | YYQGTEAQI      | YYQGTEAEI      | MHCnuggetsI                        | 37.24                         | 104.02                                 | 2.79                      |
| 22  | TNPO3     | HLA-A*11:01 | p.L183V  | SVLMTCVEK      | SLLMTCVEK      | MHCflurry                          | 13.58                         | 33.33                                  | 2.45                      |
| 23  | DIAPH1    | HLA-C*07:02 | p.S28L   | GRSPDELPL      | GRSPDELPS      | SMMPMBEC                           | 18.73                         | 42.33                                  | 2.26                      |
| 24  | SHPK      | HLA-B*54:01 | p.Q80H   | LPRPHLRSV      | LPRPQLRSV      | NetMHC                             | 19.52                         | 43.17                                  | 2.21                      |
| 25  | SBF2      | HLA-A*11:01 | p.E987Q  | QVSPEVVEIFK    | EVSPEVVEIFK    | MHCnuggetsI                        | 12.75                         | 25.02                                  | 1.96                      |
| 26  | FAM13B    | HLA-A*11:01 | p.L712P  | ASFQKSLLYY     | ASLQKSLLYY     | MHCnuggetsI                        | 10.57                         | 18.93                                  | 1.79                      |
| 27  | SMG7      | HLA-C*07:02 | p.M1107I | IMHPGPSAL      | MMHPGPSAL      | SMM                                | 96.20                         | 172.25                                 | 1.79                      |
| 28  | SERHL2    | HLA-A*11:01 | p.S232P  | RELCAHFIRK     | RELCAHSIRK     | NetMHC                             | 64.01                         | 111.44                                 | 1.74                      |
| 29  | MAP4      | HLA-A*11:01 | p.D931N  | ATNTSAPNLK     | ATNTSAPDLK     | MHCnuggetsI                        | 17.47                         | 29.94                                  | 1.71                      |
| 30  | EAF2      | HLA-C*07:02 | p.D11H   | HRRRVLKLL      | DRRERVLKLL     | SMM                                | 18.93                         | 32.00                                  | 1.69                      |
| 31  | CEP57     | HLA-A*11:01 | p.R30W   | SMVWHSSSPY     | SMVRHSSSPY     | MHCflurry                          | 150.33                        | 239.70                                 | 1.59                      |
| 32  | PATZ1     | HLA-A*11:01 | p.P298D  | GILPCGLCDK     | GILPCGLCGK     | MHCnuggetsI                        | 21.21                         | 32.21                                  | 1.52                      |
| 33  | BHLHE41   | HLA-A*11:01 | p.P81A   | KLTTLAHLEK     | KLTTLGHLEK     | MHCnuggetsI                        | 53.03                         | 72.33                                  | 1.36                      |
| 34  | RUFY2     | HLA-C*07:02 | p.H153D  | FYEYDALMM      | FYEYHALMM      | MHCnuggetsI                        | 36.06                         | 49.08                                  | 1.36                      |
| 35  | USP31     | HLA-C*07:02 | p.S377Y  | YYDGFHRYF      | YYDGFHRSF      | MHCnuggetsI                        | 6.92                          | 9.16                                   | 1.32                      |
| 36  | ACP2      | HLA-A*24:02 | p.E314Q  | PYASCHIFQL     | PYASCHIFEL     | MHCflurry                          | 58.54                         | 73.90                                  | 1.26                      |
| 37  | TFIP11    | HLA-A*11:01 | p.P658L  | GLLEKHLFPK     | GLLEKHFFPK     | MHCnuggetsI                        | 20.12                         | 25.34                                  | 1.26                      |

| No. | Gene Name | HLA Allele  | HGVSp    | MT Epitope Seq | WT Epitope Seq | Best IC <sub>50</sub> MT algorithm | Best IC <sub>50</sub> MT (nM) | IC <sub>50</sub> corresponding WT (nM) | Corresponding Fold Change |
|-----|-----------|-------------|----------|----------------|----------------|------------------------------------|-------------------------------|----------------------------------------|---------------------------|
| 38  | PICALM    | HLA-B*54:01 | p.Q413E  | HPMSTASEVA     | HPMSTASQVA     | SMM                                | 8.72                          | 10.82                                  | 1.24                      |
| 39  | RABGAP1L  | HLA-A*11:01 | p.E320K  | ALMNKIQAAG     | ALMNEIQAAG     | MHCflurry                          | 23.43                         | 28.54                                  | 1.22                      |
| 40  | NAGA      | HLA-A*11:01 | p.M302I  | ILQNPLIK       | ILQNPLMIK      | MHCnuggetsI                        | 37.01                         | 45.00                                  | 1.22                      |
| 41  | LRRC41    | HLA-A*11:01 | p.E350Q  | ATSHQAPGTK     | ATSHEAPGTK     | MHCflurry                          | 25.72                         | 30.01                                  | 1.17                      |
| 42  | HSPA2     | HLA-A*24:02 | p.E107Q  | QYKGETKTFF     | EYKGETKTFF     | SMM                                | 46.85                         | 54.29                                  | 1.16                      |
| 43  | ADK       | HLA-A*11:01 | p.E340Q  | RTGCTFPQK      | RTGCTFPEK      | MHCflurry                          | 18.15                         | 20.91                                  | 1.15                      |
| 44  | RMDN1     | HLA-B*54:01 | p.R226T  | MPWYQTRIA      | MPWYQRRIA      | MHCnuggetsI                        | 1.87                          | 2.13                                   | 1.14                      |
| 45  | MAFG      | HLA-A*11:01 | p.V70M   | ASCRMKRVTQK    | ASCRVKRVTQK    | MHCflurry                          | 44.90                         | 50.24                                  | 1.12                      |
| 46  | MAZ       | HLA-A*11:01 | p.E181Q  | AVAPVASALQK    | AVAPVASALEK    | MHCflurry                          | 18.73                         | 20.95                                  | 1.12                      |
| 47  | AASDH     | HLA-A*11:01 | p.L144R  | LVLFRRHVK      | LVLFRRLHVK     | MHCnuggetsI                        | 25.00                         | 27.52                                  | 1.10                      |
| 48  | ACTR5     | HLA-A*11:01 | p.L476V  | LQYIVDRYPK     | LQYILDYYPK     | MHCflurry                          | 21.35                         | 22.78                                  | 1.07                      |
| 49  | POLD2     | HLA-A*24:02 | p.P403L  | VYLCGNTPSF     | VYFCGNTPSF     | MHCnuggetsI                        | 17.50                         | 18.54                                  | 1.06                      |
| 50  | ZNF326    | HLA-A*24:02 | p.S155P  | NYFSYSSF       | NYSSYSSF       | MHCflurry                          | 17.20                         | 17.73                                  | 1.03                      |
| 51  | RIF1      | HLA-C*07:02 | p.E1447K | RRKEKEKPL      | RRKEEEKPL      | MHCnuggetsI                        | 14.63                         | 15.05                                  | 1.03                      |
| 52  | TDRD7     | HLA-A*11:01 | p.E1089K | MSKYLIELSK     | MSEYLIELSK     | NetMHC                             | 36.04                         | 36.44                                  | 1.01                      |
