# Supplementary material for: Stimulating T cell responses against patient-derived breast cancer cells with neoantigen peptide-loaded peripheral blood mononuclear cells
Source: Springer Nature journal article supplement (doi:10.1007/s00262-024-03627-3), 2024-02-13
Supplement: MOESM10 [file 26729214]

**Supplementary Table S5b. List of candidate neoantigens of PC-B-148CA**

| No. | Gene Name | HLA Allele  | HGVSp   | MT Epitope Seq | WT Epitope Seq | Best IC <sub>50</sub> MT algorithm | Best IC <sub>50</sub> MT (nM) | IC <sub>50</sub> corresponding WT (nM) | Corresponding Fold Change |
|-----|-----------|-------------|---------|----------------|----------------|------------------------------------|-------------------------------|----------------------------------------|---------------------------|
| 1   | LSR       | HLA-A*24:02 | p.I158P | YYQGRRFTI      | YYQGRRITI      | MHCflurry                          | 10.19                         | 34.00                                  | 3.34                      |
| 2   | ALKBH6    | HLA-A*24:02 | p.V83M  | RYMDKVSNSLSLF  | RYVDKVSNSLSLF  | MHCnuggetsI                        | 8.18                          | 22.60                                  | 2.76                      |
| 3   | GAA       | HLA-C*07:02 | p.I823T | LRAGYTIPL      | LRAGYIPL       | MHCflurry                          | 61.56                         | 88.89                                  | 1.44                      |
| 4   | ELMO2     | HLA-A*24:02 | p.L289P | LYVFQVLTF      | LYVLQVLTF      | MHCflurry                          | 10.19                         | 11.10                                  | 1.09                      |
