# Supplementary material for: Stimulating T cell responses against patient-derived breast cancer cells with neoantigen peptide-loaded peripheral blood mononuclear cells
Source: Springer Nature journal article supplement (doi:10.1007/s00262-024-03627-3), 2024-02-13
Supplement: MOESM11 [file 26729214]

**Supplementary Table S6. List of candidate neoantigens of PC-B-142 tissue**

| No. | Gene Name | HLA Allele  | HGVSp    | MT Epitope Seq | WT Epitope Seq | Best IC <sub>50</sub> MT algorithm | Best IC <sub>50</sub> MT (nM) | IC <sub>50</sub> corresponding WT (nM) | Corresponding Fold Change |
|-----|-----------|-------------|----------|----------------|----------------|------------------------------------|-------------------------------|----------------------------------------|---------------------------|
| 1   | ADGRL1    | HLA-A*11:01 | p.E274K  | KTIDIDLAVDK    | KTIDIDLAVDE    | NetMHC                             | 38.97                         | 24602.85                               | 631.328                   |
| 2   | PARP1     | HLA-A*11:01 | p.E619K  | AIEHFMKLYK     | AIEHFMKLYE     | MHCflurry                          | 13.346                        | 2110.722                               | 158.156                   |
| 3   | TAX1BP1*  | HLA-B*54:01 | p.P724A  | CPMCSEQFPA     | CPMCSEQFPP     | MHCnuggetsI                        | 5.947                         | 790.244                                | 132.873                   |
| 4   | SEC14L2   | HLA-A*11:01 | p.R43Q   | LQARSFDLQK     | LRARSFDLQK     | MHCnuggetsI                        | 118.433                       | 3646.316                               | 30.788                    |
| 5   | IFT88     | HLA-A*11:01 | p.D684H  | HTYKDTHRK      | DTYKDTHRK      | MHCflurry                          | 21.599                        | 178.872                                | 8.282                     |
| 6   | G3BP1     | HLA-A*11:01 | p.F124L  | KLYVHNDIFR     | KFYVHNDIFR     | MHCflurry                          | 94.682                        | 681.646                                | 7.199                     |
| 7   | FLNA      | HLA-A*24:02 | p.E2056Q | TFQPAEFII      | TFEPAEFII      | MHCflurry                          | 122.91                        | 690.21                                 | 5.616                     |
| 8   | MAP1LC3B  | HLA-A*11:01 | p.E18Q   | RVQDVRLIR      | RVEDVRLIR      | MHCnuggetsI                        | 61.052                        | 264.145                                | 4.327                     |
| 9   | SHL2      | HLA-A*11:01 | p.S232F  | RELCAHFIRK     | RELCAHSIRK     | NetMHC                             | 64.01                         | 111.44                                 | 1.741                     |
| 10  | MAP4      | HLA-A*11:01 | p.D931N  | ATNTSAPNLK     | ATNTSAPDLK     | MHCnuggetsI                        | 17.467                        | 29.942                                 | 1.714                     |
| 11  | TBC1D19   | HLA-C*07:02 | p.E313Q  | YYFVFQDYL      | YYFVFEDYL      | SMM                                | 20.757                        | 32.447                                 | 1.563                     |
| 12  | PATZ1     | HLA-A*11:01 | p.G298D  | GILPCGLCDK     | GILPCGLCGK     | MHCnuggetsI                        | 21.209                        | 32.211                                 | 1.519                     |
| 13  | PAQR6     | HLA-A*11:01 | p.S14F   | ASFSPPTCLK     | ASSSPPTCLK     | MHCflurry                          | 6.969                         | 9.312                                  | 1.336                     |
| 14  | RABGAP1L  | HLA-A*11:01 | p.E320K  | ALMNKIQAAG     | ALMNEIQAAK     | MHCflurry                          | 23.428                        | 28.542                                 | 1.218                     |
| 15  | LRRC41    | HLA-A*11:01 | p.E350Q  | ATSHQAPGTK     | ATSHEAPGTK     | MHCflurry                          | 25.716                        | 30.014                                 | 1.167                     |
| 16  | ADK       | HLA-A*11:01 | p.E340Q  | RTGCTFPQK      | RTGCTFPEK      | MHCflurry                          | 18.146                        | 20.908                                 | 1.152                     |
| 17  | MAFG      | HLA-A*11:01 | p.V70M   | ASCRMKRVTQK    | ASCRVKRVTQK    | MHCflurry                          | 44.901                        | 50.237                                 | 1.119                     |
| 18  | PEX1      | HLA-A*11:01 | p.E484Q  | LVISQEEFIK     | LWISEEEFIK     | MHCflurry                          | 25.656                        | 27.836                                 | 1.085                     |
| 19  | ACTR5     | HLA-A*11:01 | p.L476V  | LQYIVDRYPK     | LQYILDYPK      | MHCflurry                          | 21.345                        | 22.778                                 | 1.067                     |
| 20  | POLD2     | HLA-A*24:02 | p.F403L  | VYLCGNTPSF     | VYFCGNTPSF     | MHCnuggetsI                        | 17.502                        | 18.544                                 | 1.06                      |
| 21  | RIF1      | HLA-C*07:02 | p.E1447K | RRKEKEKPL      | RRKEEEKPL      | MHCnuggetsI                        | 14.627                        | 15.051                                 | 1.029                     |

\* Unselected peptide due to no healthy donor expressing HLA-B\*54:01 is available
